# Supplementary material
Source: ML conference proceedings conference paper supplement (https://aclanthology.org/2021.teachingnlp-1.7)

$il$

$il$

$il$

$il$

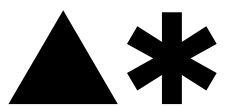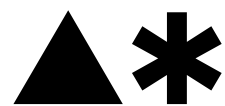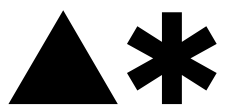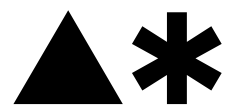

*lo*

*il*

*lo*

*lo*

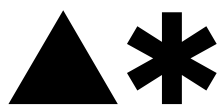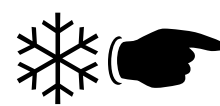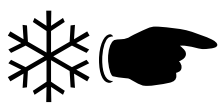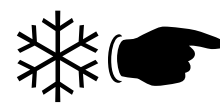

*lo*

*lo*

*la*

*la*

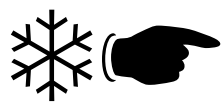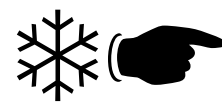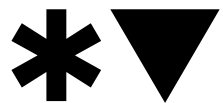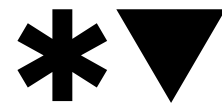

$la$

$la$

$l$

$la$

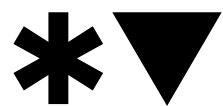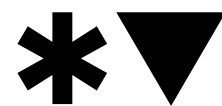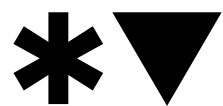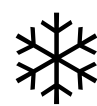



*l*

*l*

*l*

*l*

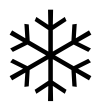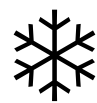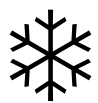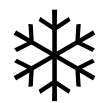

$i$

$i$

$i$

$i$

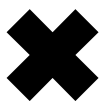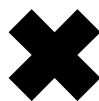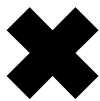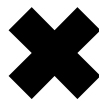

*un*

*i*

*un*

*un*

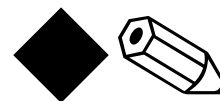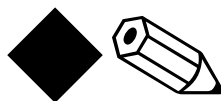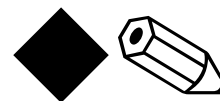

*un*

*un*

*uno*

*uno*

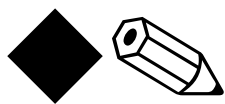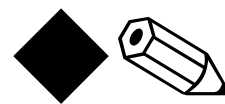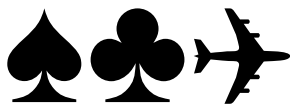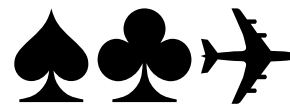



*uno*

*uno*

*una*

*uno*

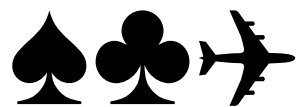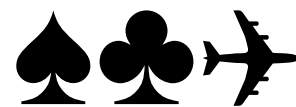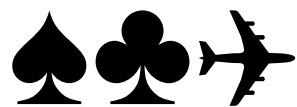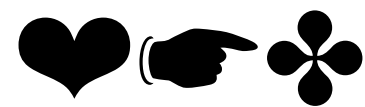

*una*

*una*

*una*

*una*

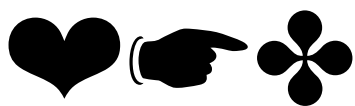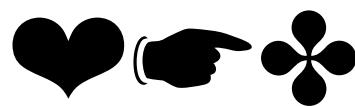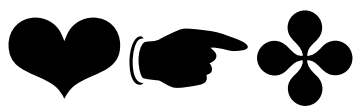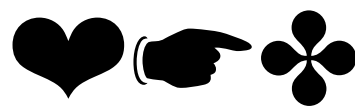

*quel*

*e*

*quel*

*e*

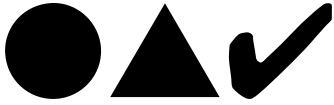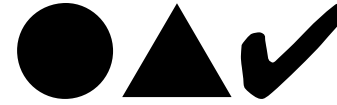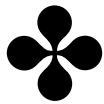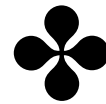

$e$

$e$

$i\eta$

$e$

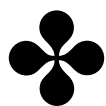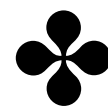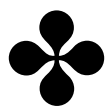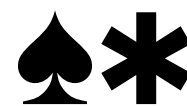



*in*

*in*

*a*

*a*

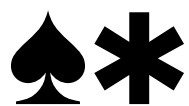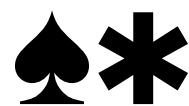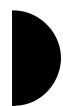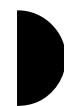

*di*

*a*

*di*

*di*

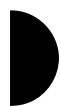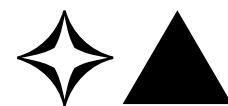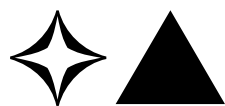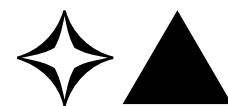

*con*

*con*

*lei*

*con*

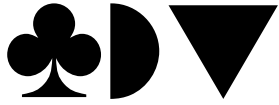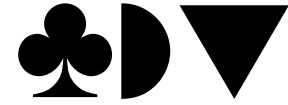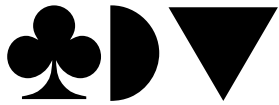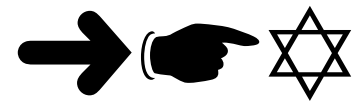

*lei*

*lei*

*non*

*non*

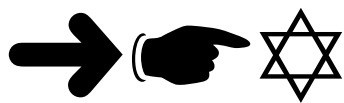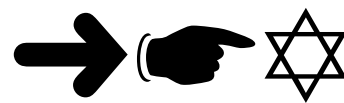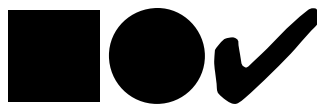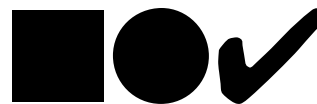



*inganno*

*non*

*donna*

*nani*

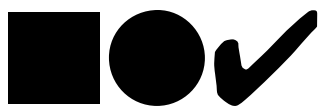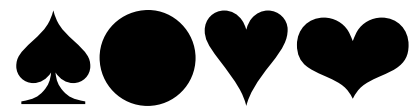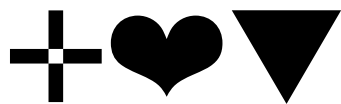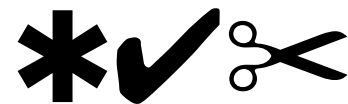

*biancaneve*

*bambina*

*specchio*

*regina*

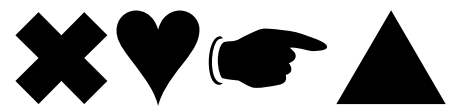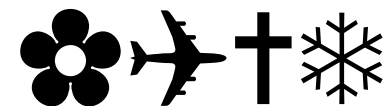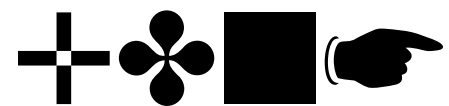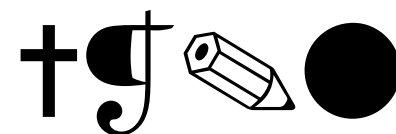

*principe*

*re*

*giorno*

*casina*

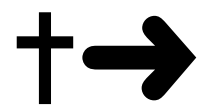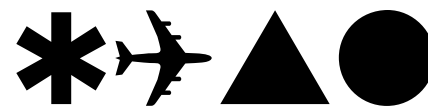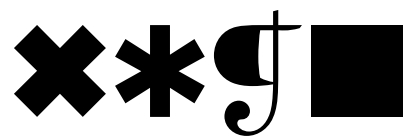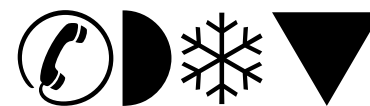

*morso*

*sera*

*gentilezza*

*mela*

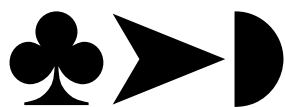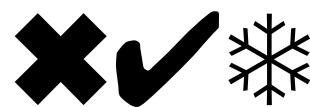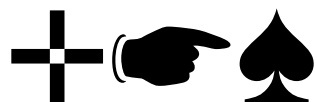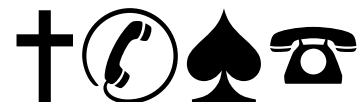



*bacio*

*bosco*

*ragazza*

*finestra*

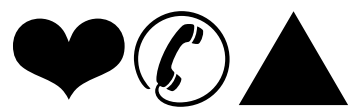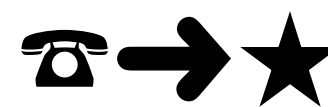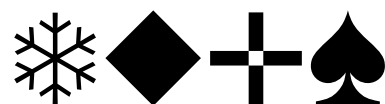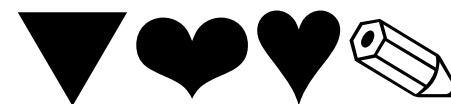

*chiese*

*ordine*

*rispose*

*chiesero*

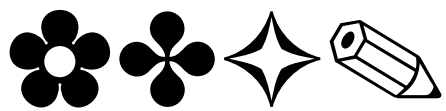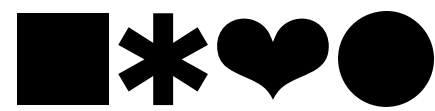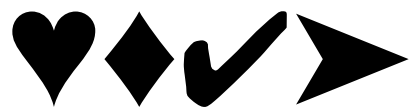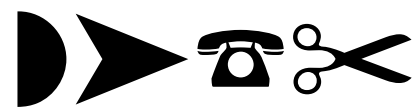

*diede*

*era*

*disse*

*si svegliò*

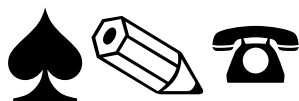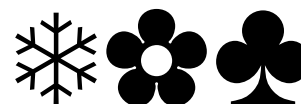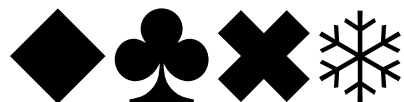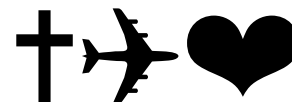

*riconobbe*

*spezzò*

*candida*

*correva*

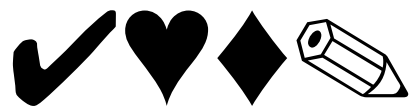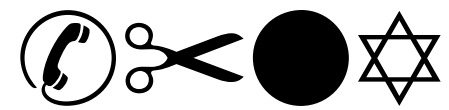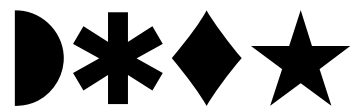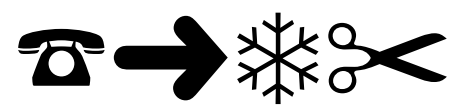



*felice*

*avvelenata*

*ordinò*

*foresta*

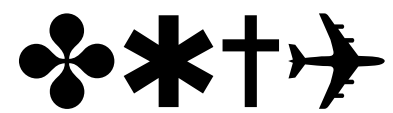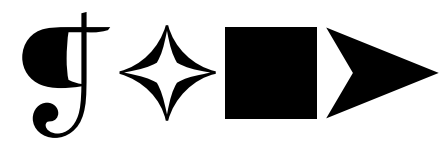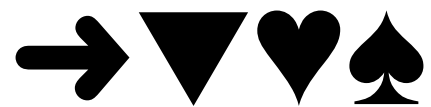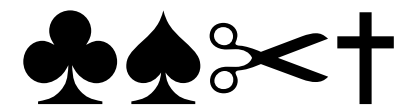

*ha dato*

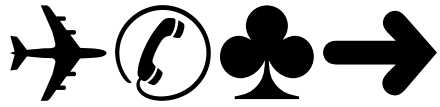

Supplement: OptionalSupplementaryMaterial [file Biancaneve_en_dings_cards_activity_1.pdf › materials/out/Biancaneve_en_dings_cards_activity_1.pdf]
