# Supplementary material
Source: ML conference proceedings conference paper supplement (https://aclanthology.org/2021.teachingnlp-1.7)

*nano*

*un*

*la*

*riconobbe*

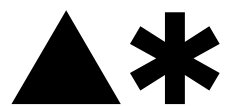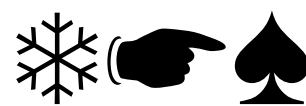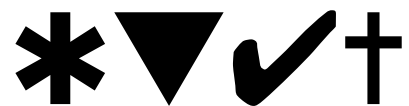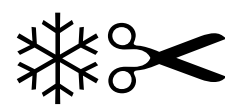

*casina*

*nostra*

*specchio*

*lo*

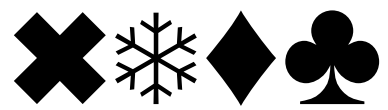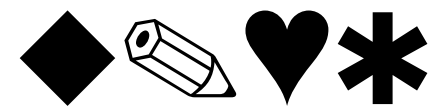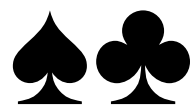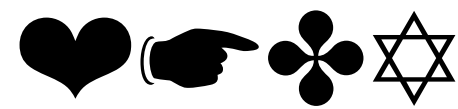

*a*

*rispose*

*altro*

*un*

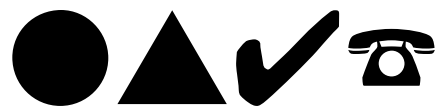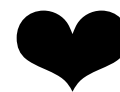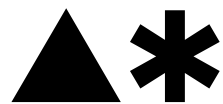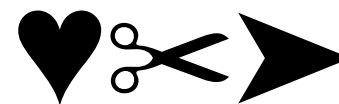

*biancaneve*

*nano*

*riconobbe*

*non*

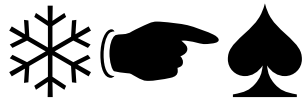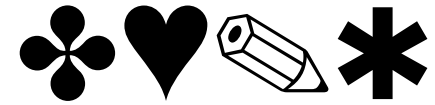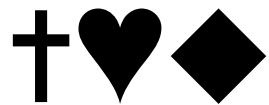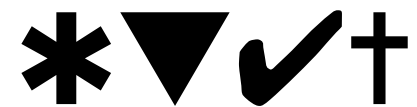



*casina*

*la*

*specchio*

*lo*

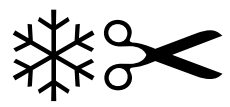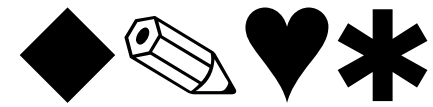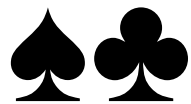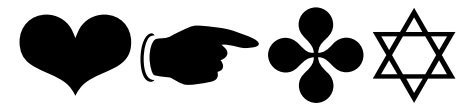

*a*

*disse*

*vecchia*

*la*

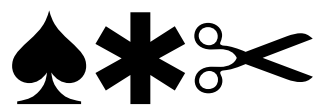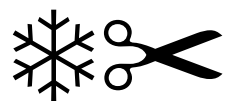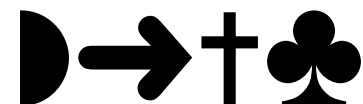

*specchio*

*lo*

*a*

*disse*

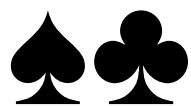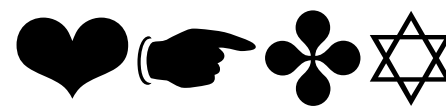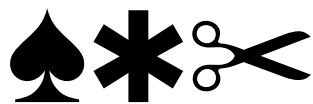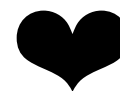

*lo*

*biancaneve*

*disse*

*specchio*

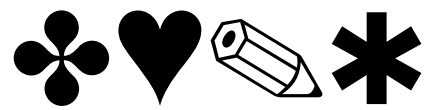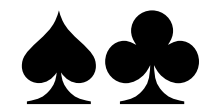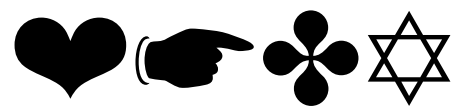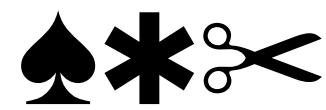



*il*

*a*

*quel*

*re*

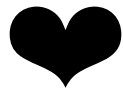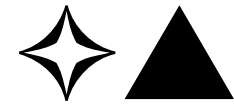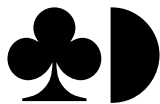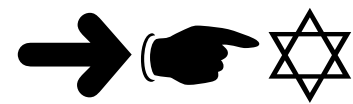

*i*

*giorno*

*chiesero*

*nani*

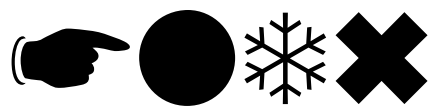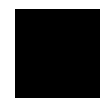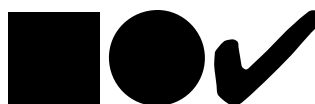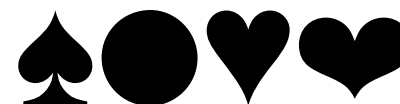

*la*

*a*

*pidocchio*

*vecchia*

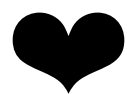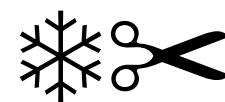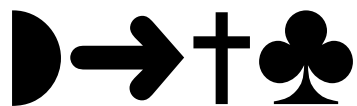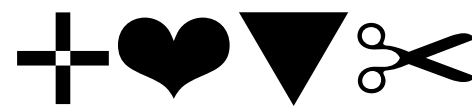

Supplement: OptionalSupplementaryMaterial [file Biancaneve_it_dings_cards_activity_1.pdf › materials/out/Biancaneve_it_dings_cards_activity_1.pdf]
