# Supplementary material
Source: ML conference proceedings conference paper supplement (https://aclanthology.org/2021.teachingnlp-1.7)

1. ♠\*<sup>3</sup> ♦📎<sup>4</sup> ☎️❄️▼<sup>6</sup> ♦■\*☎️<sup>2</sup> ♥👉♣️<sup>4</sup> ✚♣️■👉<sup>6</sup> ♣️➤●❄️<sup>1</sup> ♠\*<sup>3</sup> ❄️★⬠♦<sup>6</sup> 🌑<sup>3</sup> \*▼<sup>4</sup> ❄️♦✚♠<sup>6</sup>

2. ♦❄️☎️<sup>3</sup> ➤📎♦⬠<sup>7</sup> ✂️✕👉<sup>6</sup> \*▼<sup>4</sup> ✚♣️■👉<sup>6</sup> ♥♦✂️<sup>1</sup> ♥👉♣️<sup>4</sup> ✕♥👉▲<sup>6</sup> ☎️➔❄️✂️<sup>2</sup> ✂️▼●<sup>3</sup> \*▼<sup>4</sup> ✓★✂️<sup>6</sup>

3. ▲\*<sup>4</sup> ✚➔<sup>6</sup> ♣️<sup>9</sup> \*▼<sup>4</sup> ✚♣️■👉<sup>6</sup> ⬠✚▼👉<sup>1</sup> \*▼<sup>4</sup> ✕♥👉▲<sup>6</sup> ♣️✈️✚❄️<sup>6</sup>

4. ♦❄️☎️<sup>3</sup> \*▼<sup>4</sup> ▲♠♥<sup>6</sup> ✧▲<sup>3</sup> \*▼<sup>4</sup> ✚♣️■👉<sup>6</sup> ♥👉♣️<sup>4</sup> ♦✓▼<sup>2</sup> \*✓✂️<sup>6</sup> ♦📎🅒️<sup>1</sup> ▲\*<sup>4</sup> ✚➔<sup>6</sup>

5. \*▼<sup>4</sup> \*✓✂️<sup>6</sup> ➔📎☎️✕<sup>1</sup> ♠♣️✈️<sup>4</sup> ✚🅒️📎●<sup>6</sup>

6. ♦📎<sup>4</sup> ☎️❄️▼<sup>6</sup> \*▼<sup>4</sup> \*✓✂️<sup>6</sup> ■\*♥●<sup>1</sup> 🌑<sup>3</sup> ❄️👉<sup>4</sup> ✚🅒️📎●<sup>6</sup>

7. ■☎️🅒️<sup>0</sup> ➤<sup>1</sup> ♣️●🅒️<sup>2</sup> ♠▼♣️<sup>3</sup> ♣️♥👉♦<sup>6</sup> ♠\*<sup>3</sup> ♥★➤✂️<sup>7</sup> ●■♣️✈️<sup>6</sup>

8. ❄️👉<sup>4</sup> ✚🅒️📎●<sup>6</sup> 🌑➤☎️✂️<sup>1</sup> 🌑<sup>3</sup> \*▼<sup>4</sup> ✚♣️■👉<sup>6</sup>

9. ✈️✚<sup>0</sup> ✂️✚♣️<sup>1</sup> ♣️●🅒️<sup>2</sup> ♠▼♣️<sup>3</sup> ♣️♥👉♦<sup>6</sup>

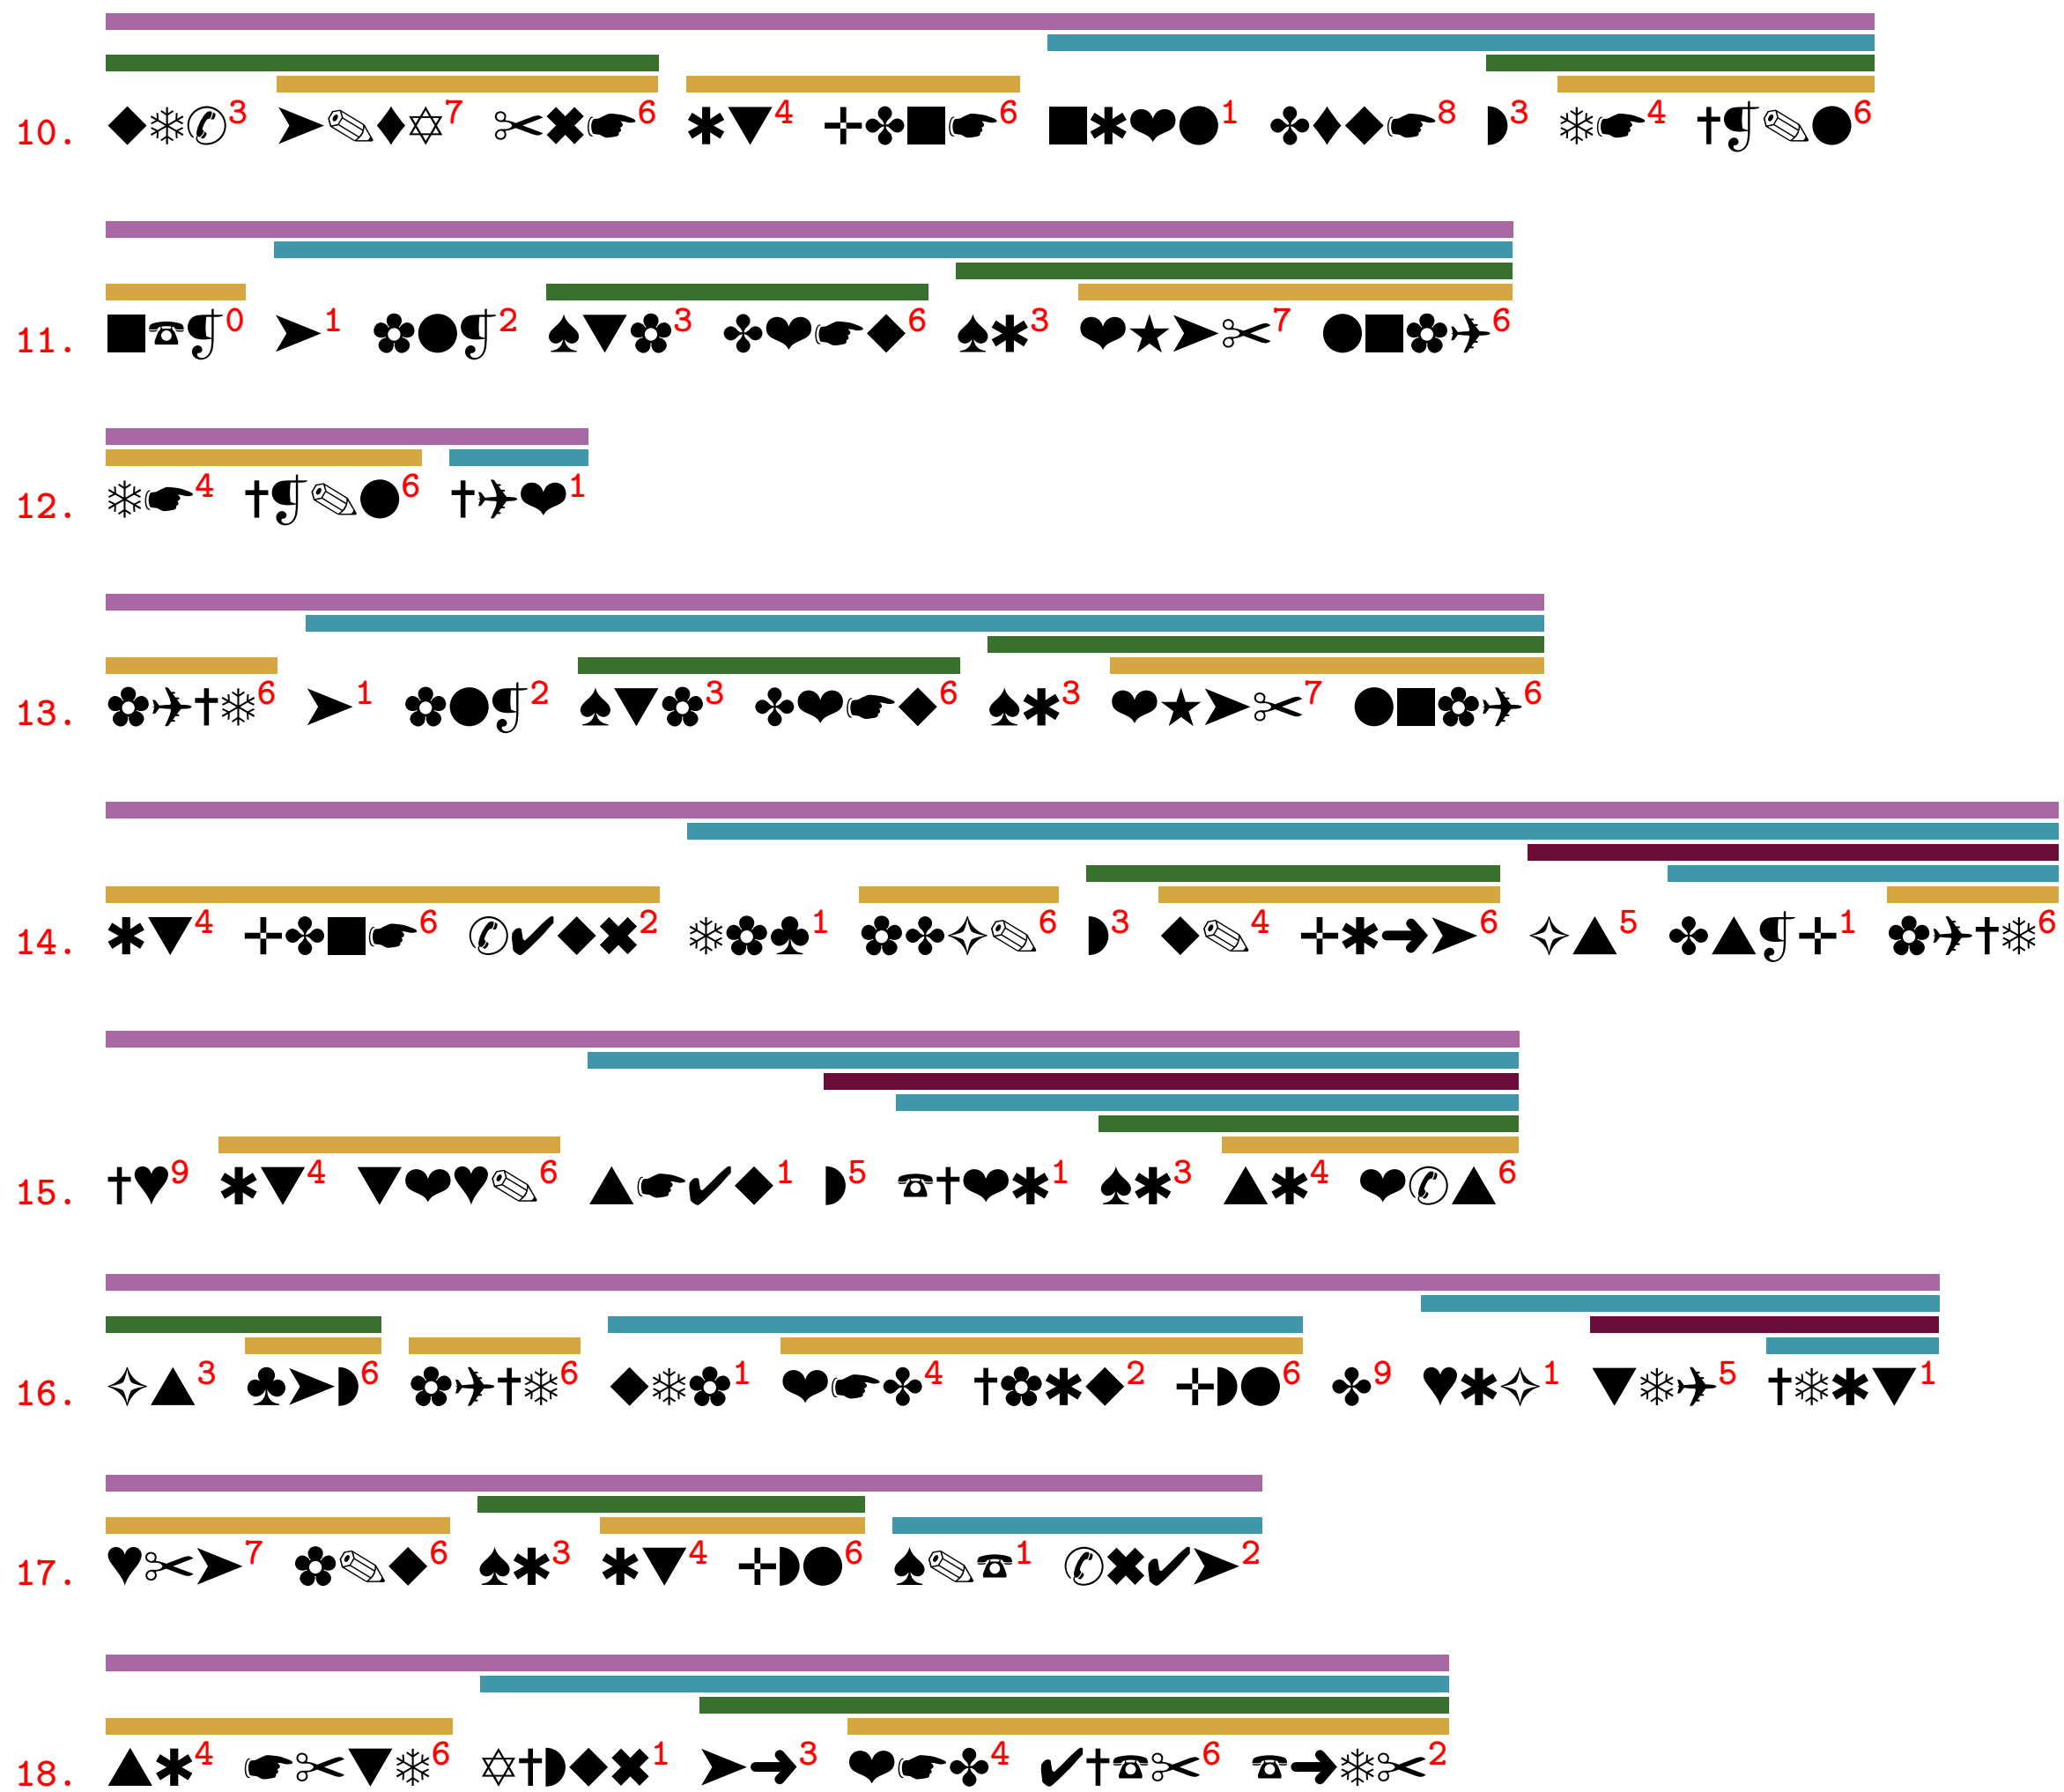

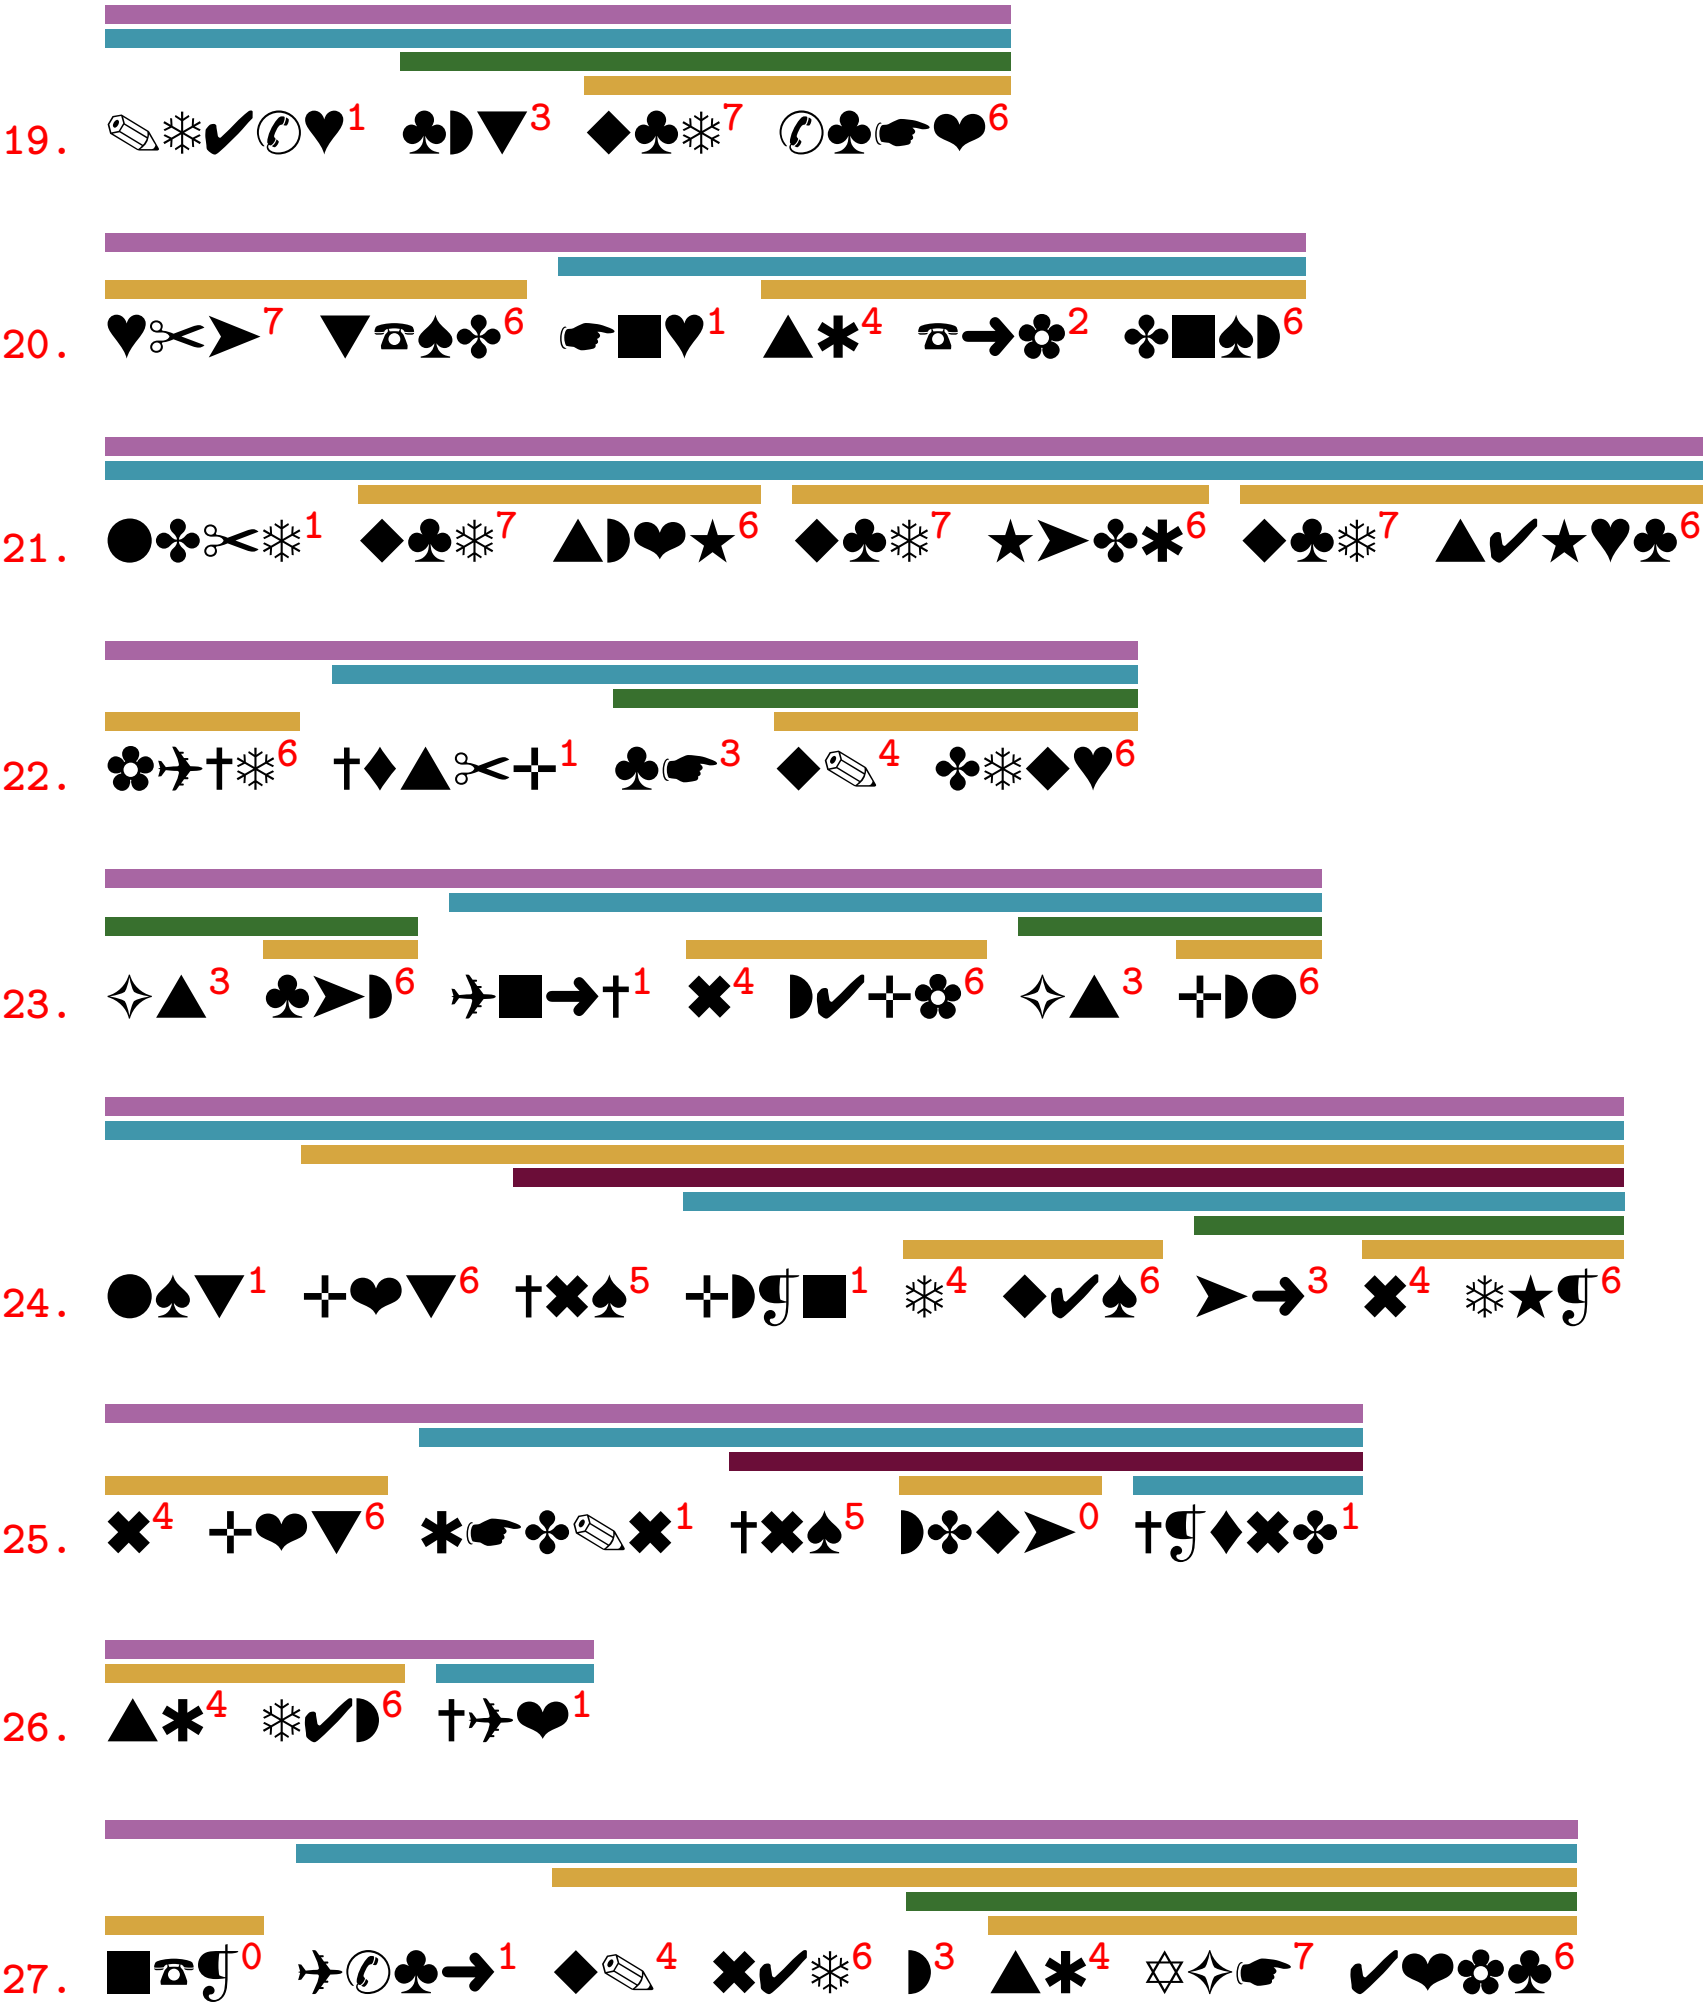

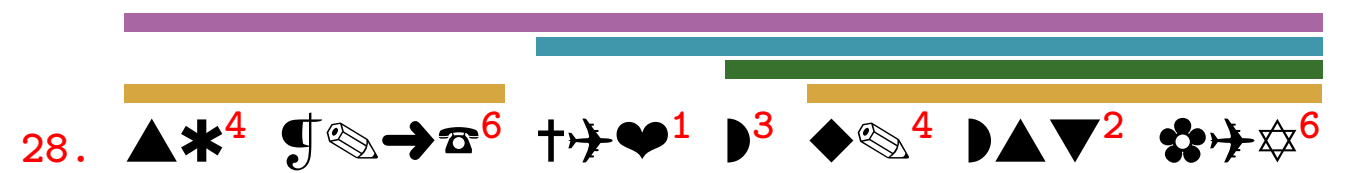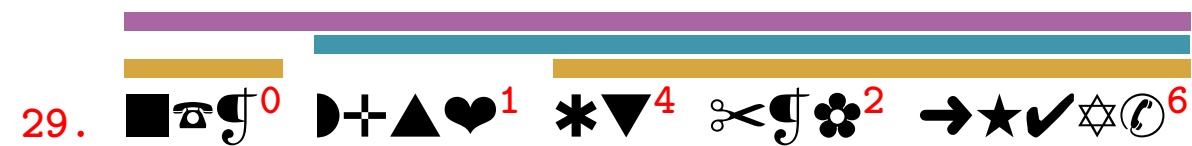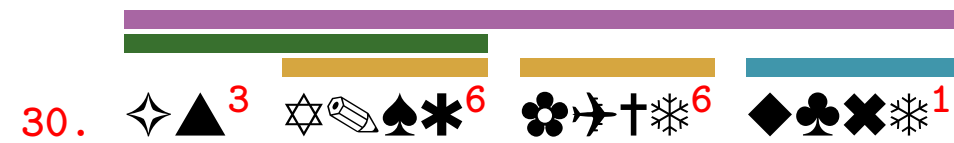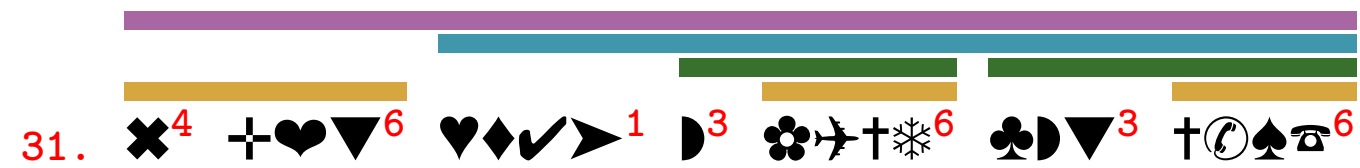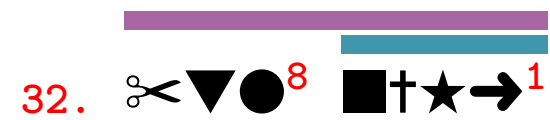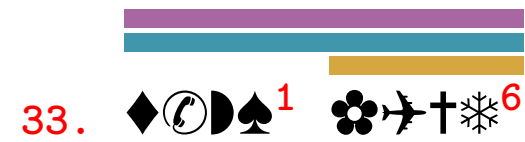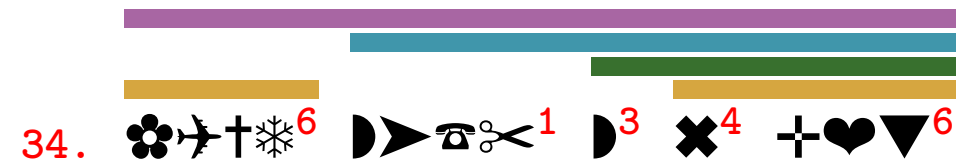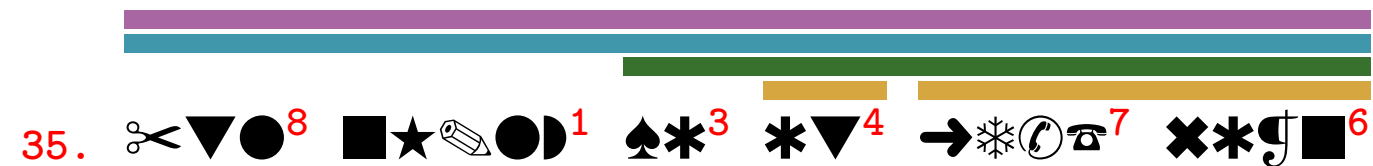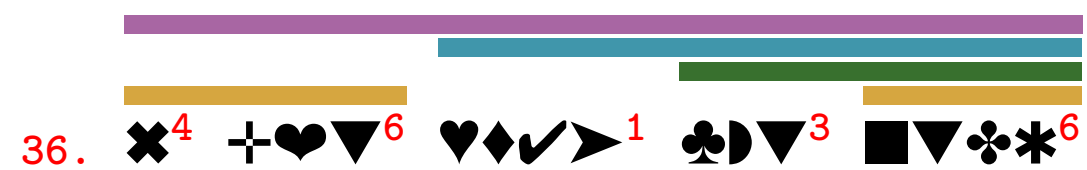

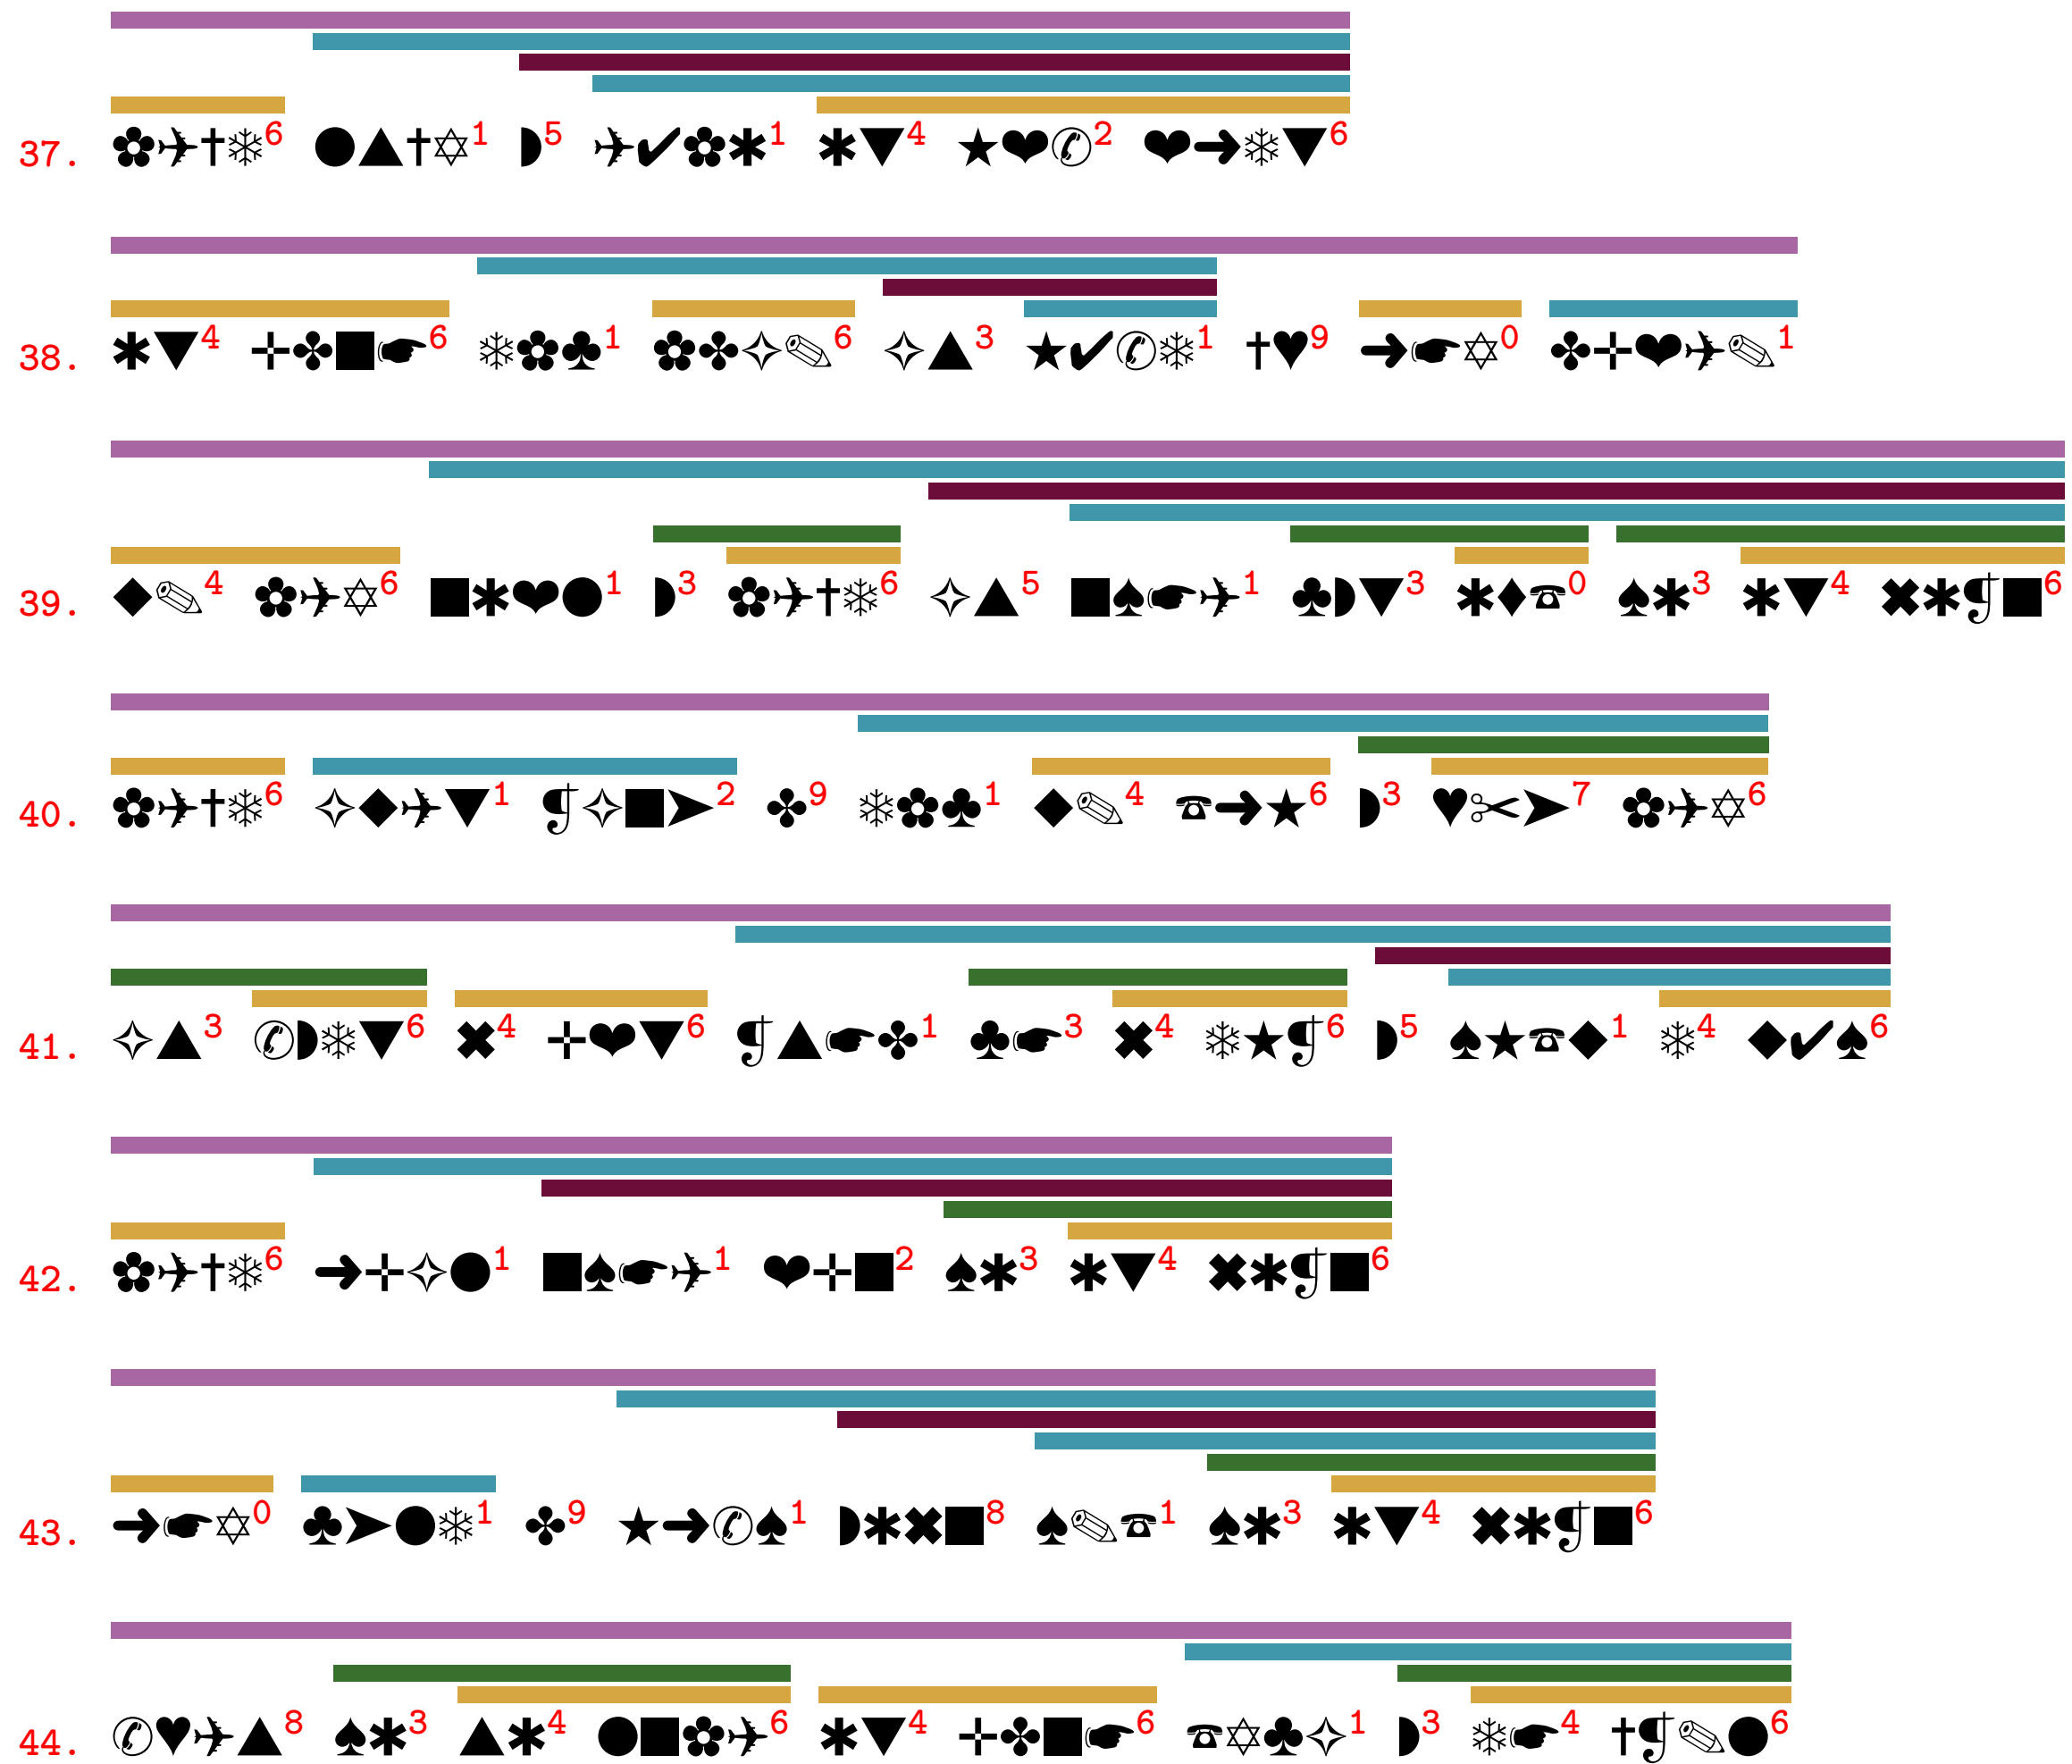

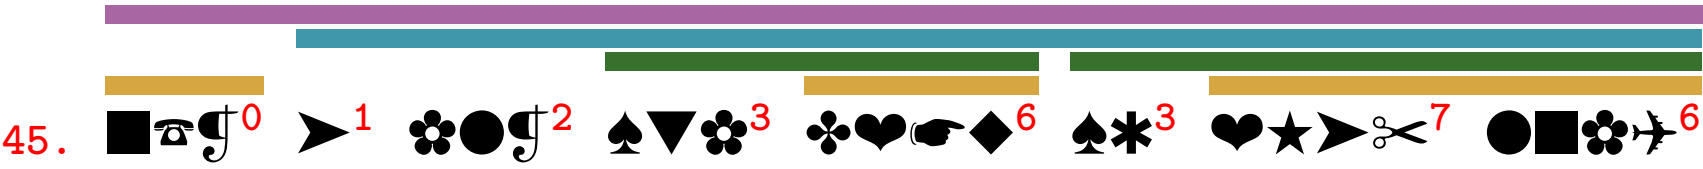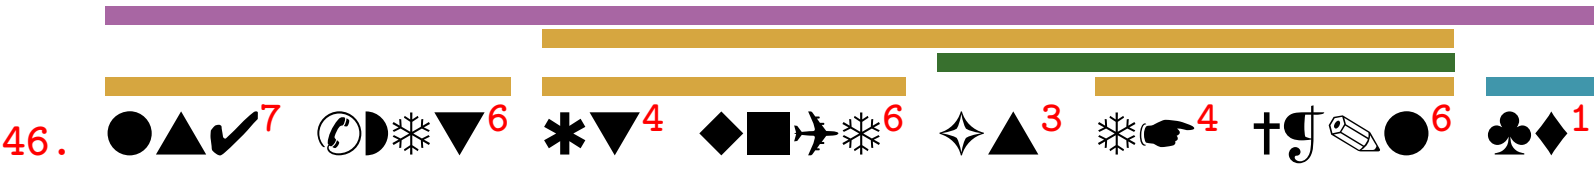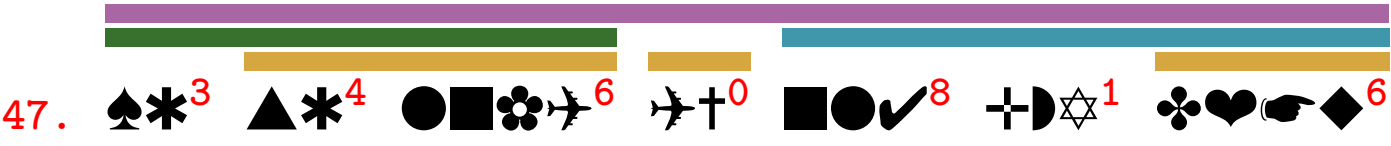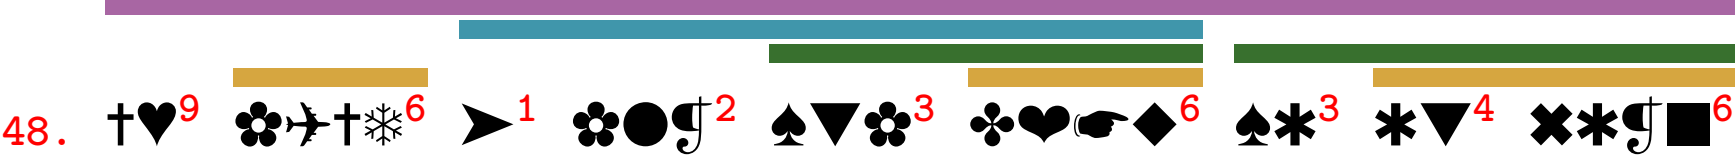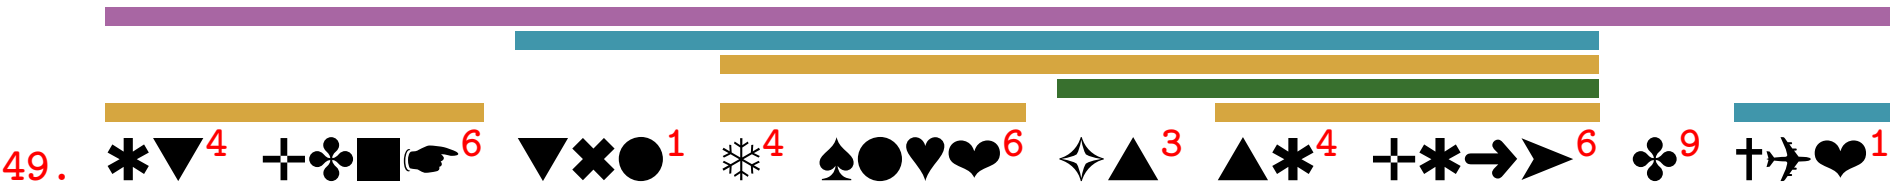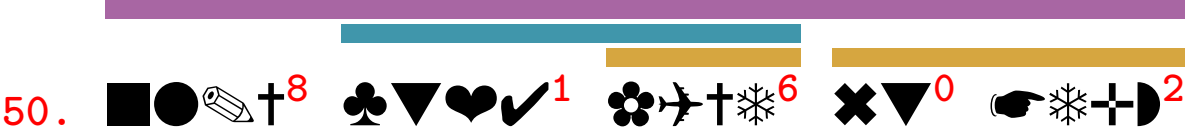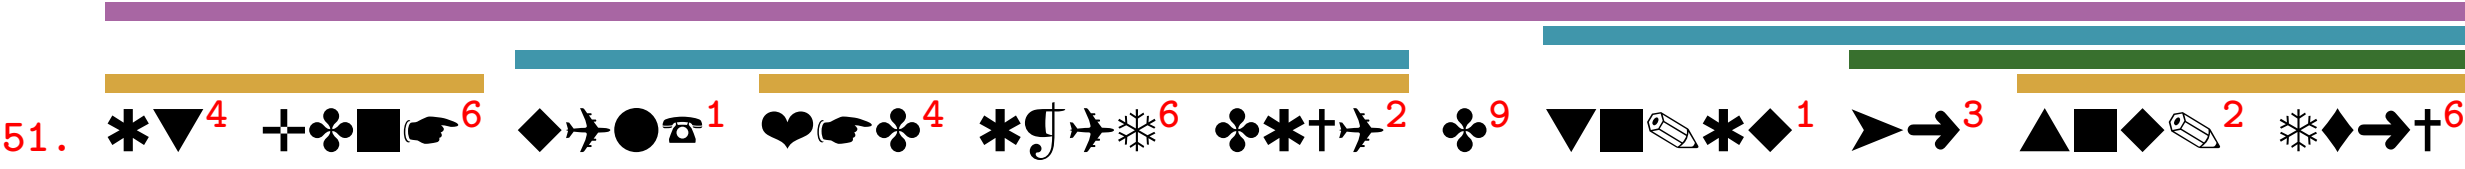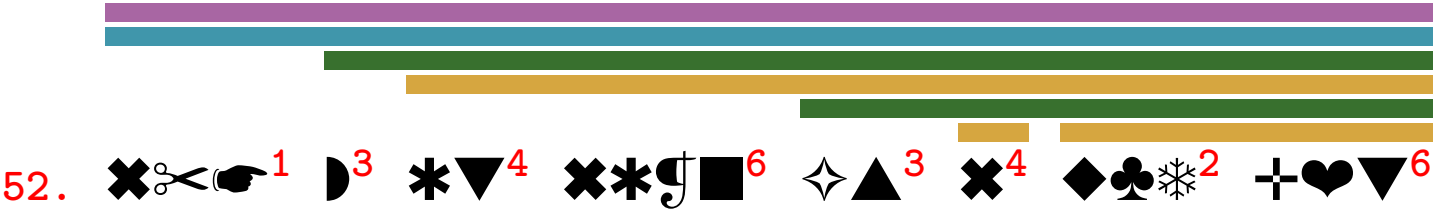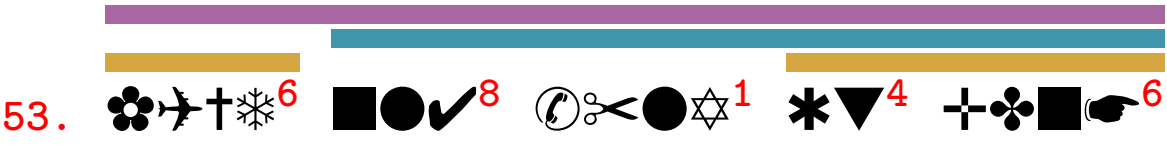

54. 

1 4 6 3 4 6 6

55. 

4 6 2 1 3 6

56. 

1 4 6

57. 

6 8 1 5 4 6 1 2

58. 

4 6 1 4 6 3 4 6 2 9 1 8 3 4 6 2

59. 

4 6 4 6 1 3 6 9 1 4 6 6 2

60. 

4 6 1 4 6 3 4 6

61. 

4 6 1 4 6 3 6

62. 

4 6 1 4 6

63.

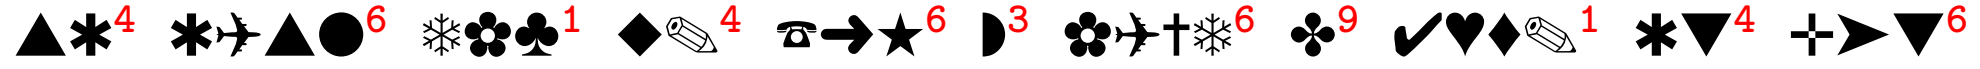

Supplement: OptionalSupplementaryMaterial [file 0210_dings_translated.pdf › materials/out/0210_dings_translated.pdf]
