# Supplementary material
Source: ML conference proceedings conference paper supplement (https://aclanthology.org/2021.teachingnlp-1.7)

1. tmo<sup>3</sup> em<sup>4</sup> cekap<sup>2</sup> sece<sup>6</sup> em<sup>4</sup> ecrev<sup>6</sup> lamykle<sup>1</sup> rat<sup>3</sup> arcy<sup>4</sup> oplak<sup>6</sup>

2. cyket<sup>3</sup> sote<sup>7</sup> kovo<sup>6</sup> orel<sup>4</sup> ecrev<sup>6</sup> memy<sup>1</sup> em<sup>4</sup> lceras<sup>6</sup> ryr<sup>3</sup> sosyv<sup>2</sup> ryr<sup>3</sup> elme<sup>6</sup>

3. cyvykre<sup>3</sup> apre<sup>0</sup> ymyv<sup>0</sup> yrmat<sup>1</sup> orel<sup>4</sup> orrok<sup>6</sup> ytocec<sup>6</sup>

4. cyket<sup>3</sup> orel<sup>4</sup> lemom<sup>6</sup> cso<sup>3</sup> orel<sup>4</sup> ecrev<sup>6</sup> orel<sup>4</sup> atlo<sup>6</sup> asaty<sup>1</sup> em<sup>4</sup> cemyso<sup>2</sup> ylcel<sup>6</sup>

5. orel<sup>4</sup> ylcel<sup>6</sup> rycse<sup>1</sup> em<sup>4</sup> arace<sup>6</sup>

6. atas<sup>9</sup> pete<sup>0</sup> vreve<sup>1</sup> tmo<sup>3</sup> orel<sup>4</sup> arace<sup>6</sup>

7. pete<sup>0</sup> kratyk<sup>1</sup>

8. ycla<sup>0</sup> tmy<sup>1</sup> cemyso<sup>2</sup> tmesy<sup>3</sup> ysov<sup>7</sup> avapo<sup>0</sup> tmo<sup>3</sup> apre<sup>7</sup> atmek<sup>6</sup>

9. orel<sup>4</sup> arace<sup>6</sup> vryteka<sup>1</sup> ovo<sup>3</sup> orel<sup>4</sup> ecrev<sup>6</sup>

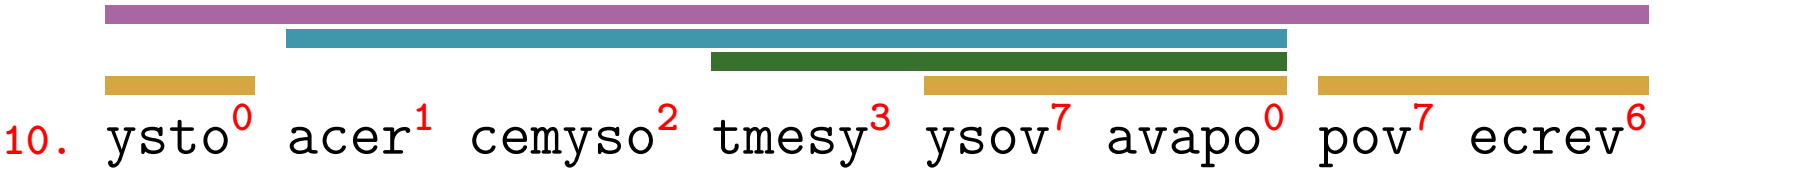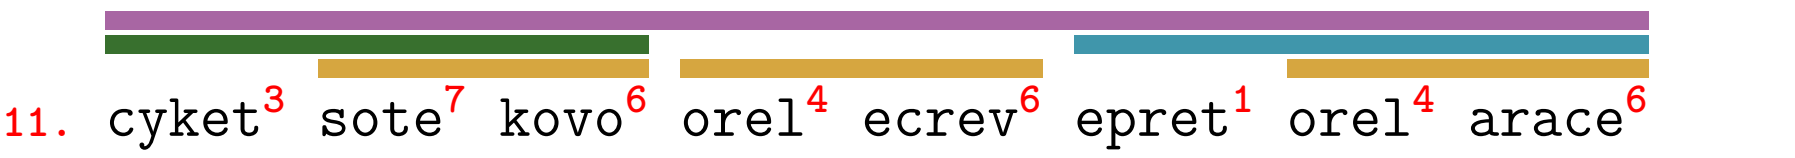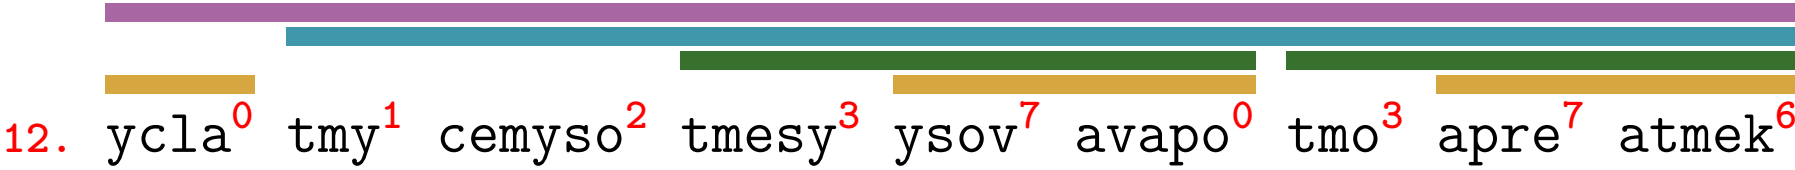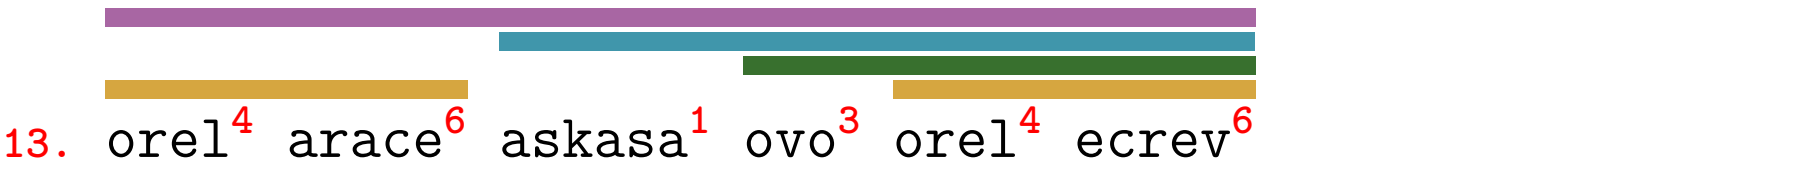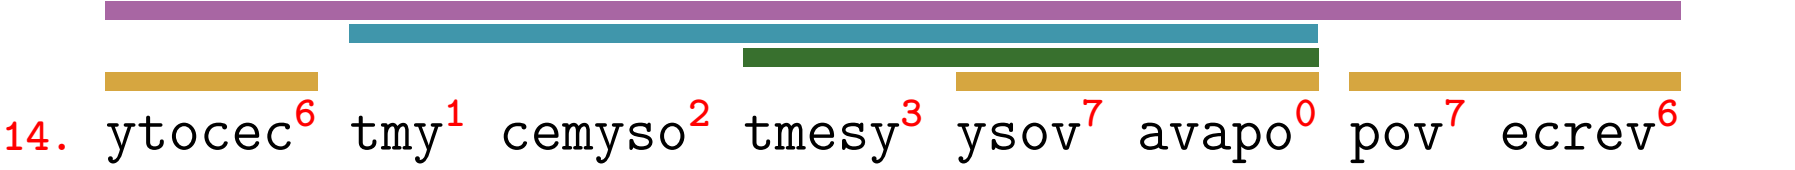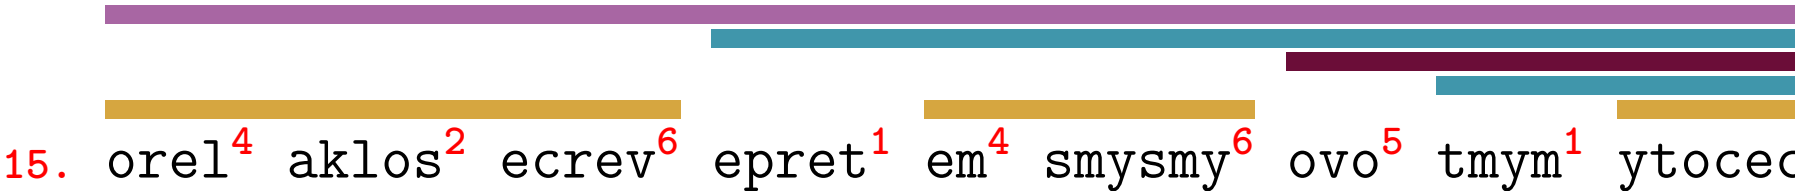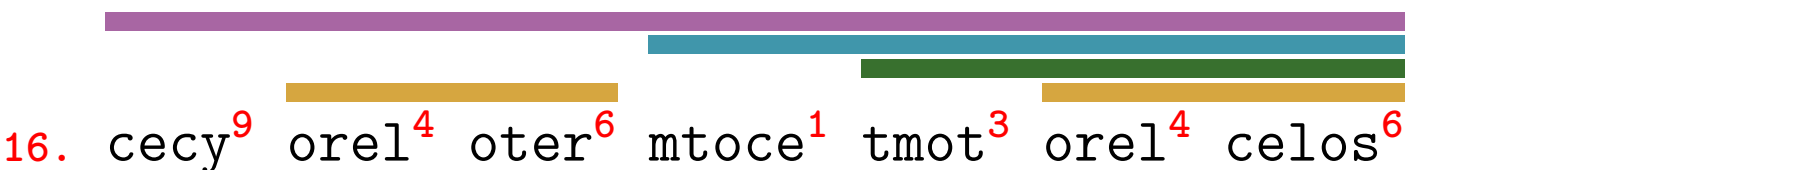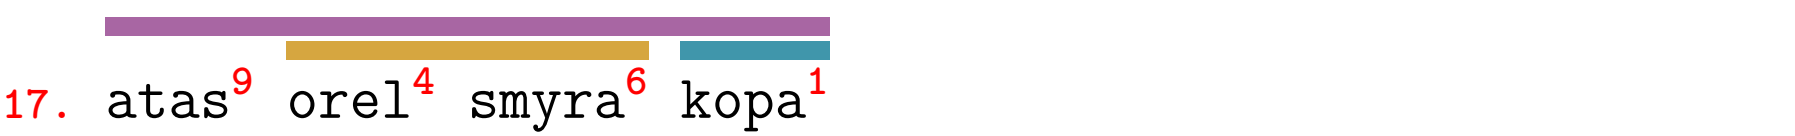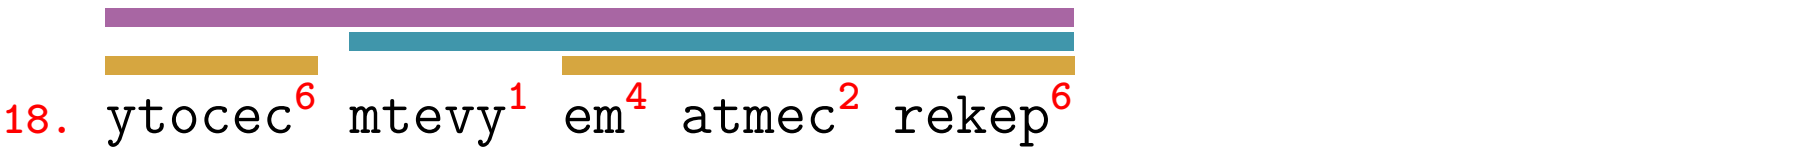

19. pete<sup>0</sup> rcere<sup>1</sup> ovo<sup>5</sup> arys<sup>1</sup>

20. emytery<sup>0</sup> tmo<sup>3</sup> orel<sup>4</sup> atmec<sup>2</sup> rekep<sup>6</sup> omak<sup>1</sup> vesy<sup>2</sup>

21. orel<sup>4</sup> lmepo<sup>6</sup> ykotory<sup>1</sup> prom<sup>3</sup> em<sup>4</sup> sosyv<sup>2</sup> opryk<sup>6</sup>

22. rta<sup>0</sup> smakac<sup>1</sup> prom<sup>3</sup> ertar<sup>7</sup> atmec<sup>2</sup> otlok<sup>6</sup>

23. kles<sup>7</sup> kelva<sup>6</sup> memy<sup>1</sup> lmyk<sup>7</sup> atmec<sup>2</sup> vylcy<sup>6</sup>

24. alotele<sup>1</sup> ertar<sup>7</sup> epasy<sup>6</sup> ertar<sup>6</sup> avlek<sup>6</sup> ertar<sup>7</sup> atmec<sup>2</sup> kempa<sup>6</sup>

25. ytocec<sup>6</sup> emta<sup>1</sup> etlev<sup>2</sup> clo<sup>3</sup> em<sup>4</sup> atmec<sup>2</sup> ycsy<sup>6</sup>

26. atas<sup>9</sup> orel<sup>4</sup> lelcy<sup>6</sup> kopa<sup>1</sup>

27. orel<sup>4</sup> ovale<sup>6</sup> cso<sup>3</sup> orel<sup>4</sup> rekep<sup>6</sup> rpotme<sup>1</sup>

28. ymyv<sup>0</sup> yset<sup>1</sup> kocry<sup>6</sup> syva<sup>5</sup> ytlo<sup>1</sup> ylve<sup>6</sup> klak<sup>3</sup> orel<sup>4</sup> krysva<sup>6</sup>

29. orel<sup>4</sup> kocry<sup>6</sup> mtevy<sup>1</sup> syva<sup>5</sup> pakry<sup>0</sup> alykevo<sup>1</sup>

30. em<sup>4</sup> klyra<sup>6</sup> epret<sup>1</sup>

31. ycla<sup>0</sup> acso<sup>1</sup> em<sup>4</sup> apas<sup>6</sup> klak<sup>3</sup> pov<sup>7</sup> amemym<sup>6</sup>

32. evlom<sup>7</sup> klyra<sup>6</sup> mota<sup>1</sup>

33. ycla<sup>0</sup> klet<sup>1</sup> pov<sup>7</sup> atmec<sup>2</sup> alap<sup>6</sup>

34. tmo<sup>3</sup> orel<sup>4</sup> croto<sup>6</sup> ytocec<sup>6</sup> kymyk<sup>1</sup>

35. orel<sup>4</sup> kocry<sup>6</sup> epret<sup>1</sup> ytocec<sup>6</sup> prom<sup>3</sup> mtecyc<sup>6</sup>

36. yrpa<sup>0</sup> tmy<sup>1</sup> lyly<sup>7</sup> oplo<sup>6</sup>

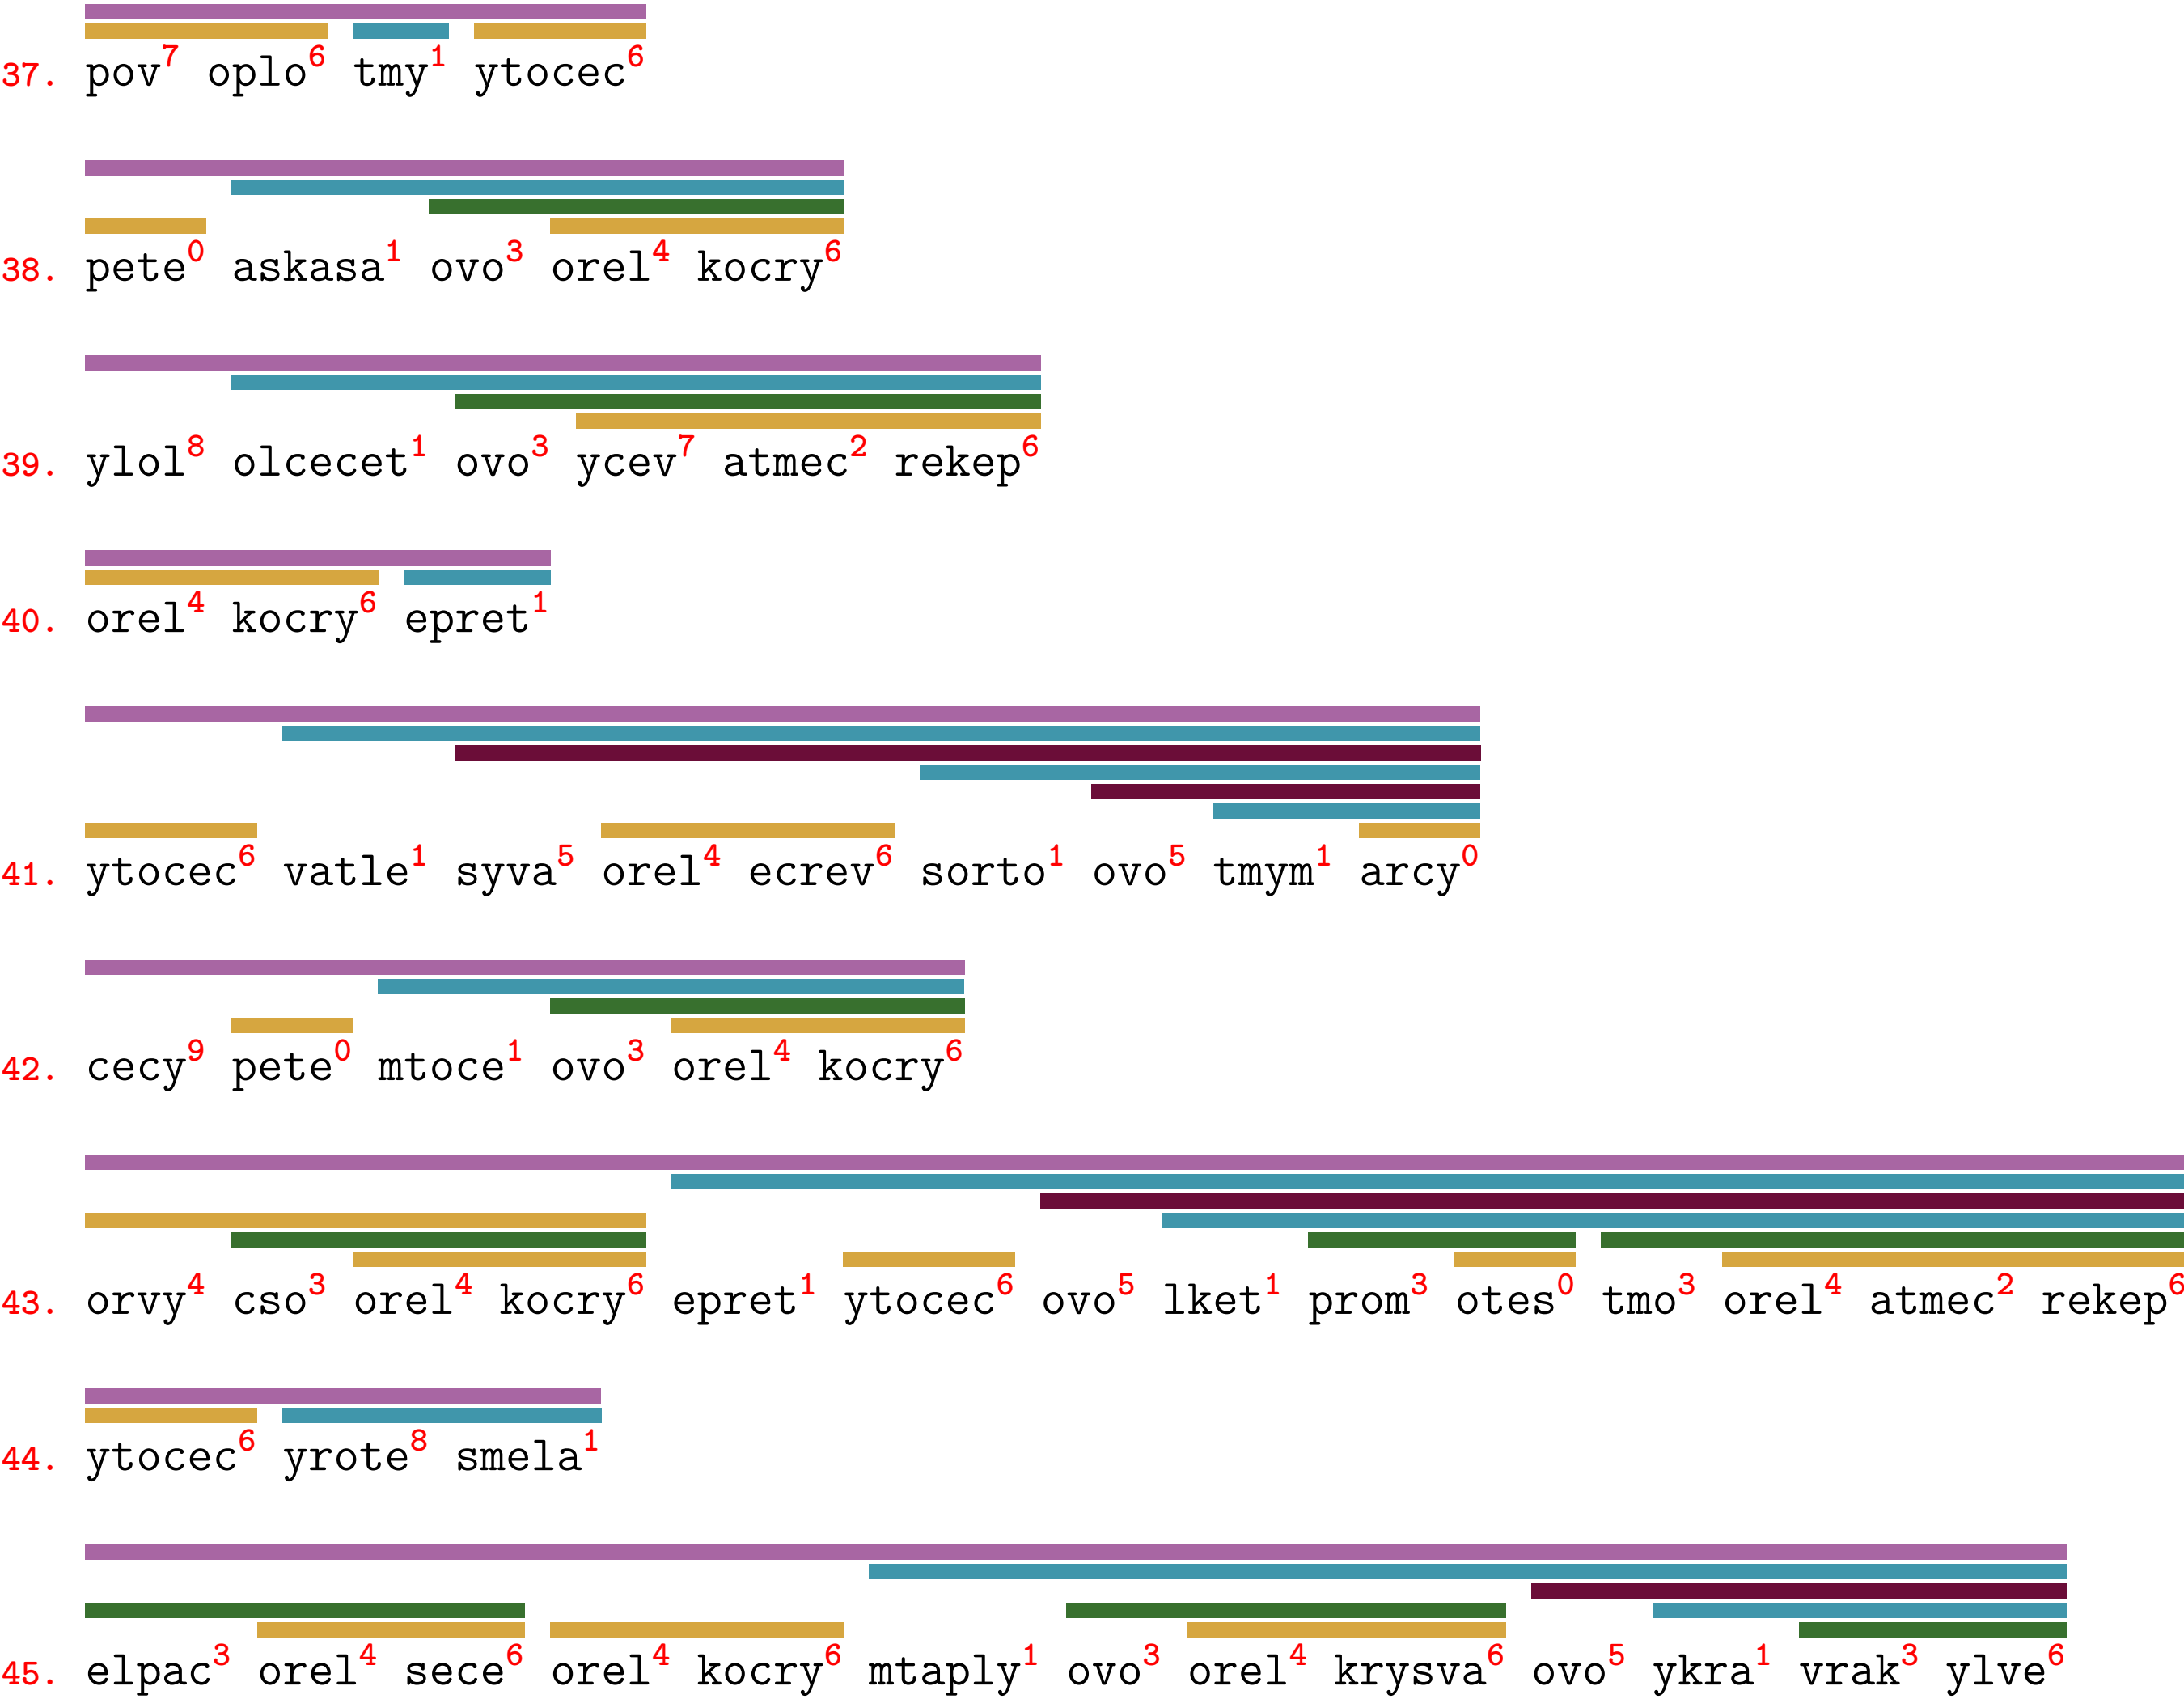

46. ytocec<sup>6</sup> tmemote<sup>1</sup> cylyc<sup>2</sup> tmo<sup>3</sup> orel<sup>4</sup> atmec<sup>2</sup> rekep<sup>6</sup>

47. lcyrat<sup>8</sup> tmo<sup>3</sup> orel<sup>4</sup> atmek<sup>6</sup> orel<sup>4</sup> ecrev<sup>6</sup> epret<sup>1</sup> orel<sup>4</sup> arace<sup>6</sup>

48. ycla<sup>0</sup> tmy<sup>1</sup> cemyso<sup>2</sup> tmesy<sup>3</sup> ysov<sup>7</sup> avapo<sup>0</sup> tmo<sup>3</sup> apre<sup>7</sup> atmek<sup>6</sup>

49. orel<sup>4</sup> arace<sup>6</sup> askasa<sup>1</sup>

50. ysto<sup>0</sup> acer<sup>1</sup> cemyso<sup>2</sup> tmesy<sup>3</sup> ysov<sup>7</sup> avapo<sup>0</sup> tmo<sup>3</sup> orel<sup>7</sup> atmek<sup>6</sup>

51. cecy<sup>9</sup> ytocec<sup>6</sup> tmo<sup>3</sup> orel<sup>4</sup> atmec<sup>2</sup> rekep<sup>6</sup> tmy<sup>1</sup> cemyso<sup>2</sup> tmesy<sup>3</sup> ysov<sup>7</sup> avapo<sup>0</sup>

52. orel<sup>4</sup> ecrev<sup>6</sup> elamem<sup>1</sup> orel<sup>4</sup> ampev<sup>6</sup> cso<sup>3</sup> orel<sup>4</sup> smysmy<sup>6</sup>

53. opro<sup>9</sup> pete<sup>0</sup> mota<sup>1</sup>

54. vrel<sup>8</sup> ym<sup>0</sup> emteta<sup>1</sup> ytocec<sup>6</sup> olymy<sup>0</sup>

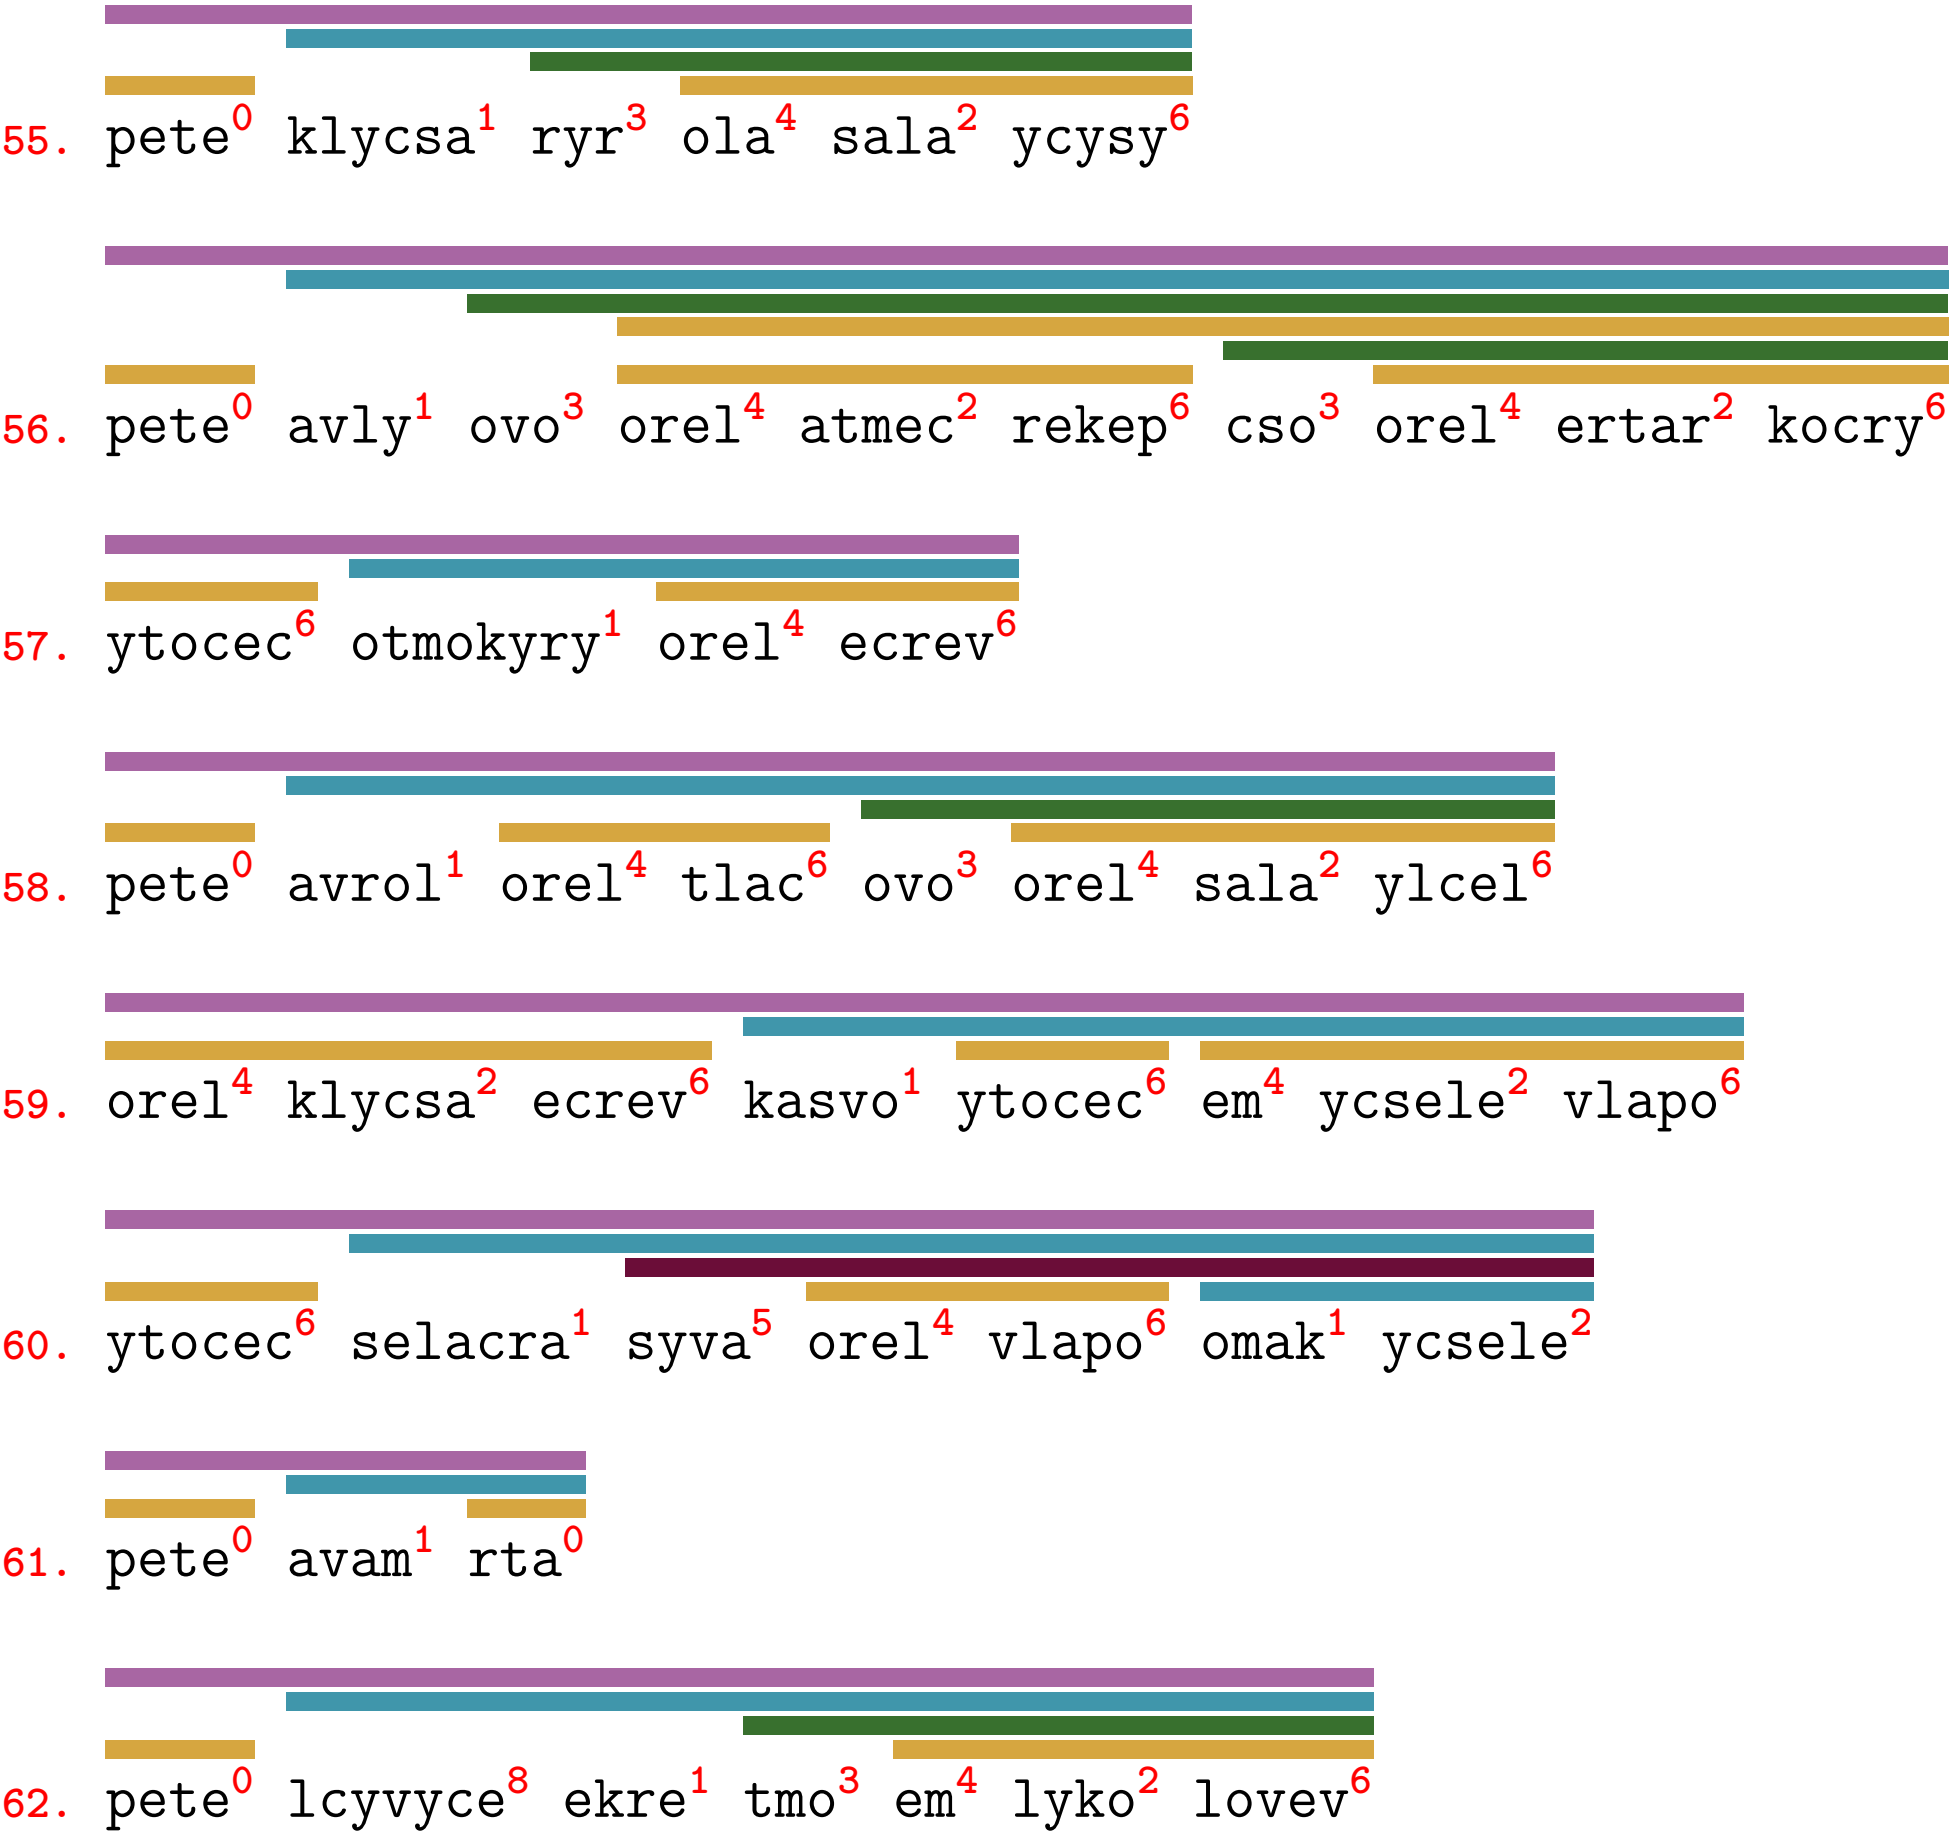

Supplement: OptionalSupplementaryMaterial [file Biancaneve_en_letters_translated.pdf › materials/out/Biancaneve_en_letters_translated.pdf]
