# Supplementary material
Source: ML conference proceedings conference paper supplement (https://aclanthology.org/2021.teachingnlp-1.7)

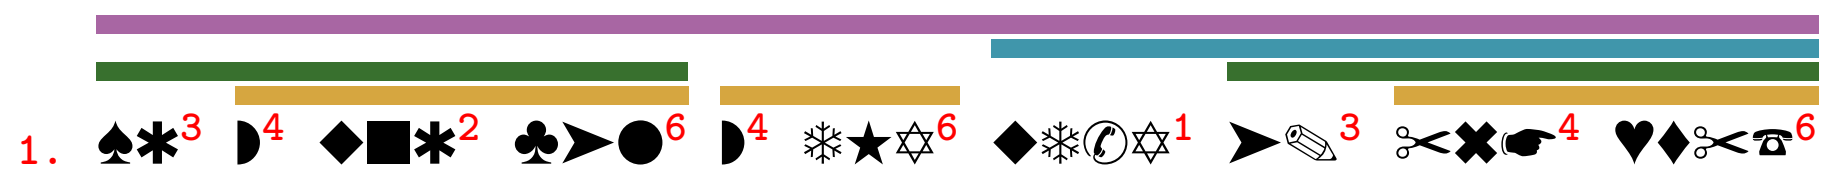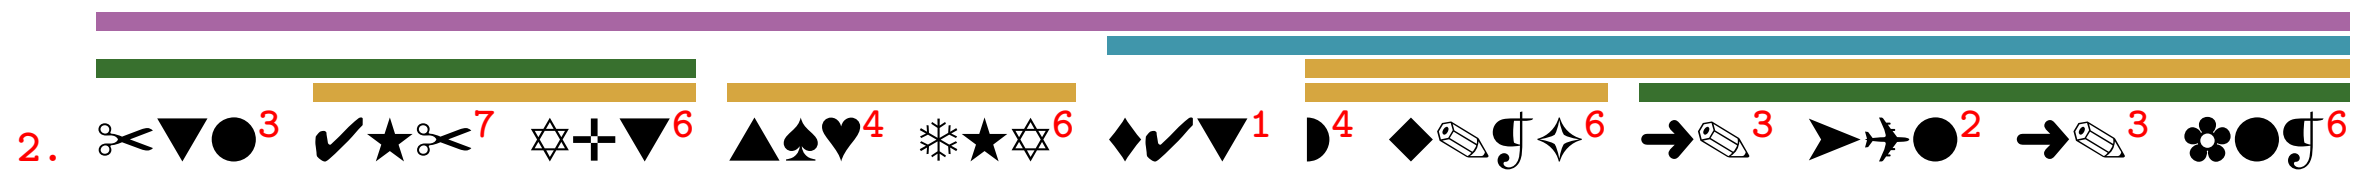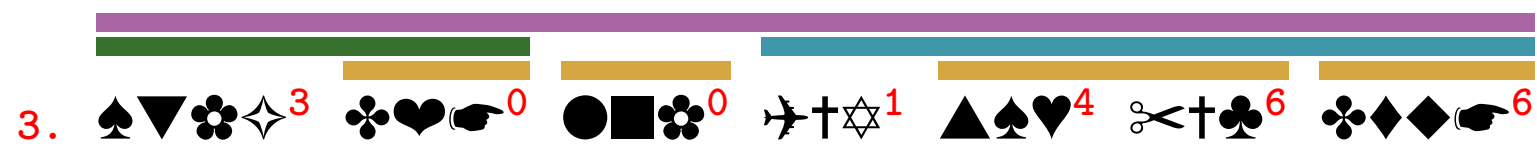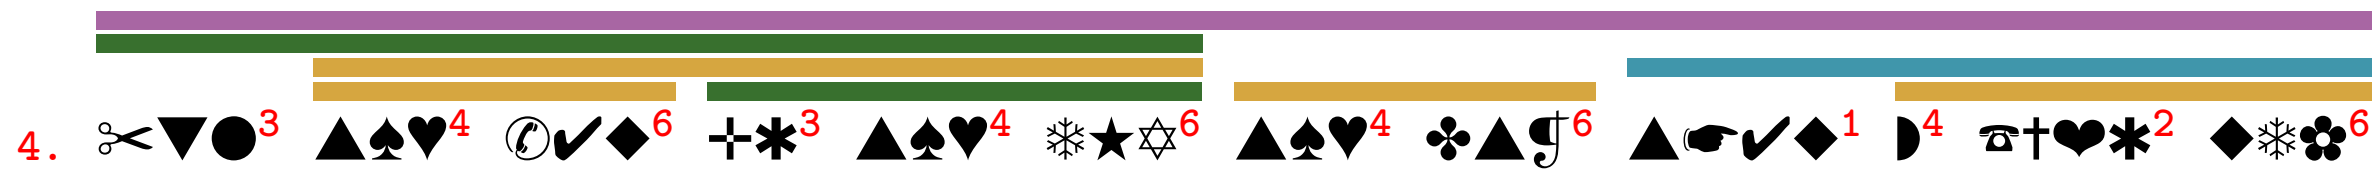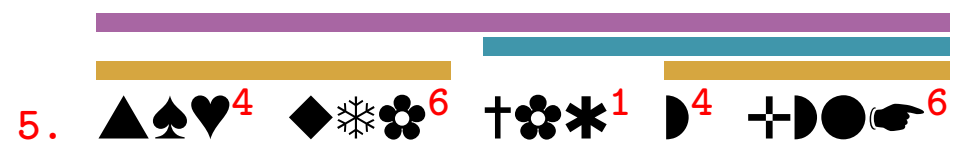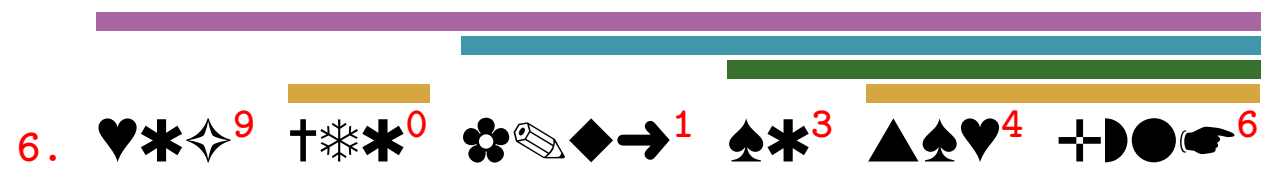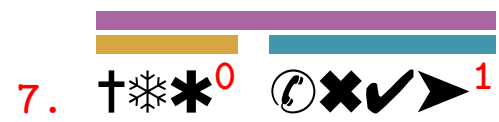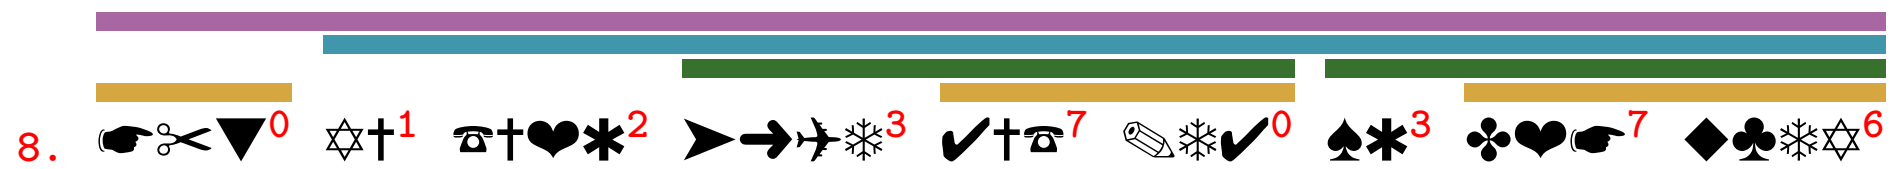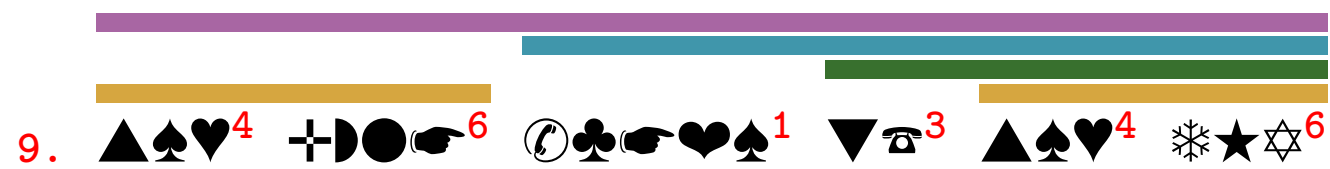

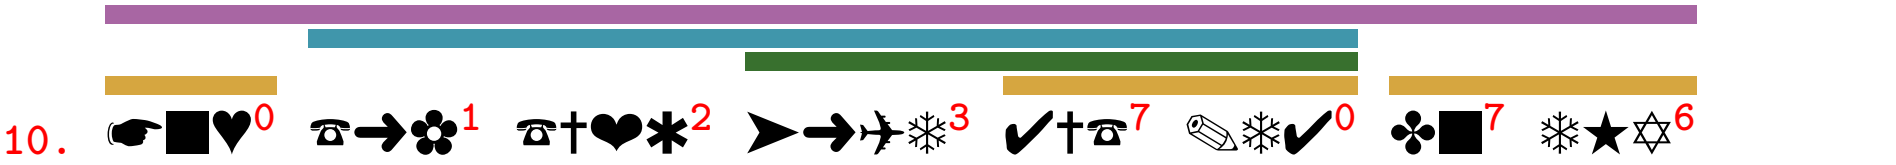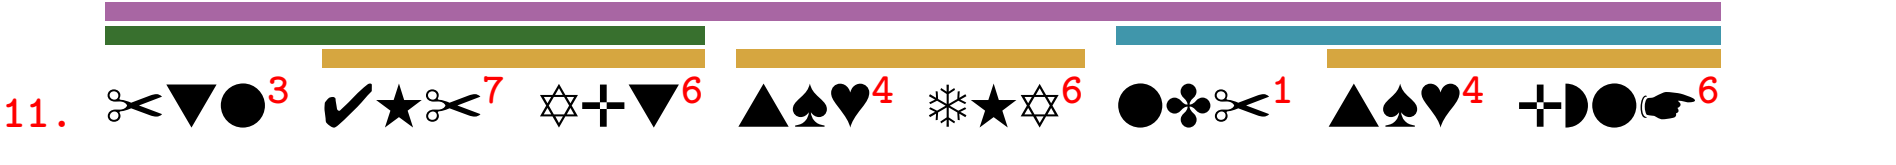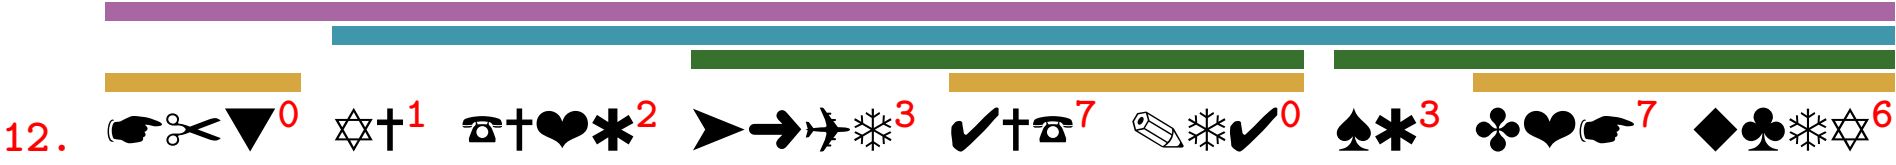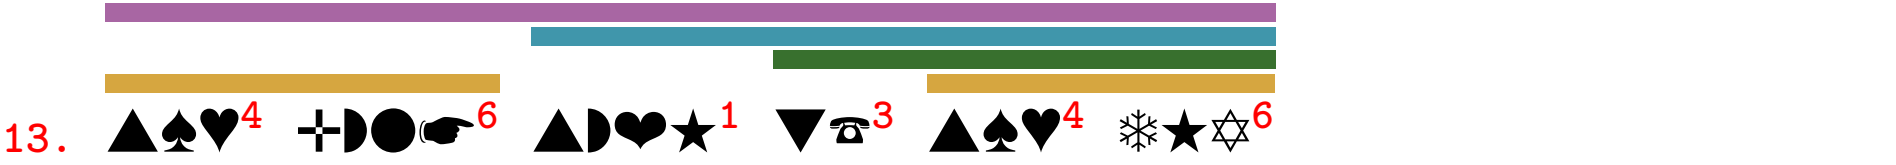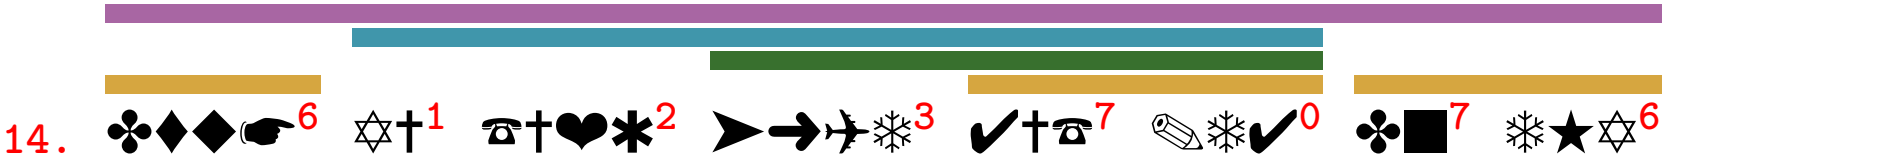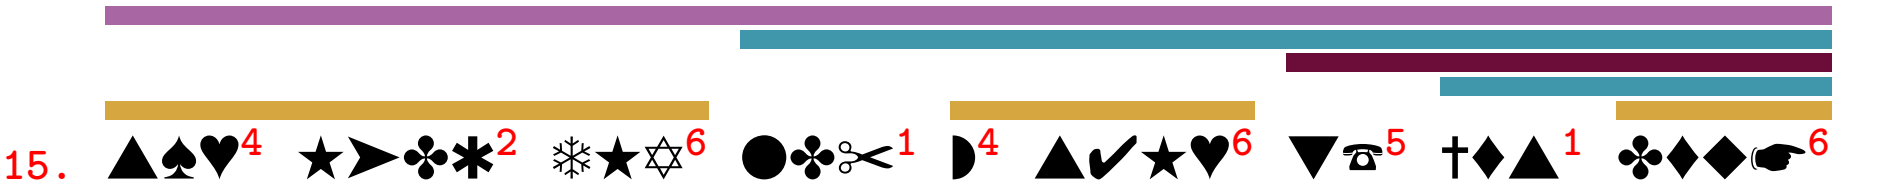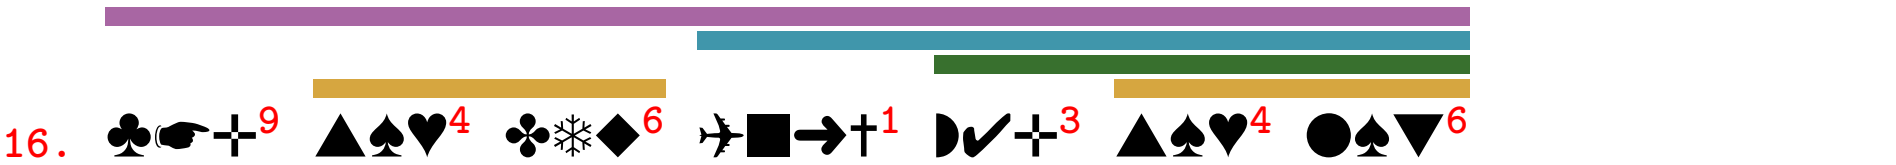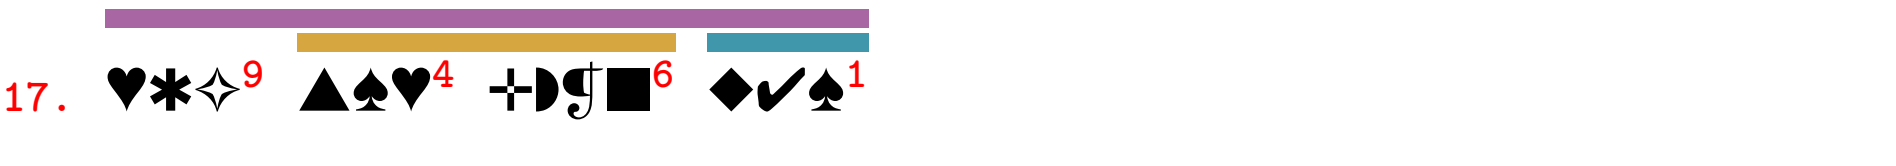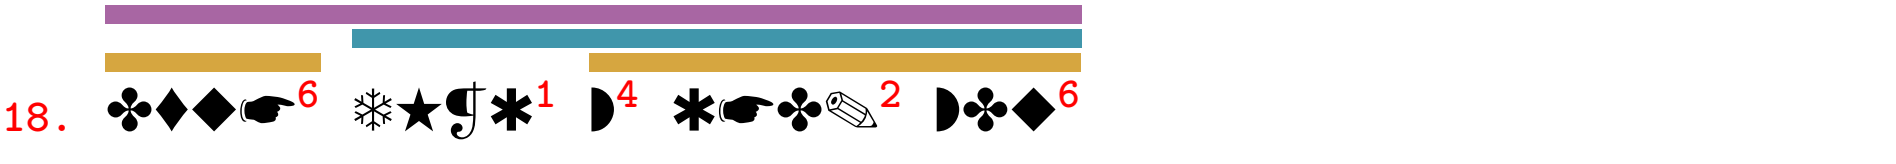

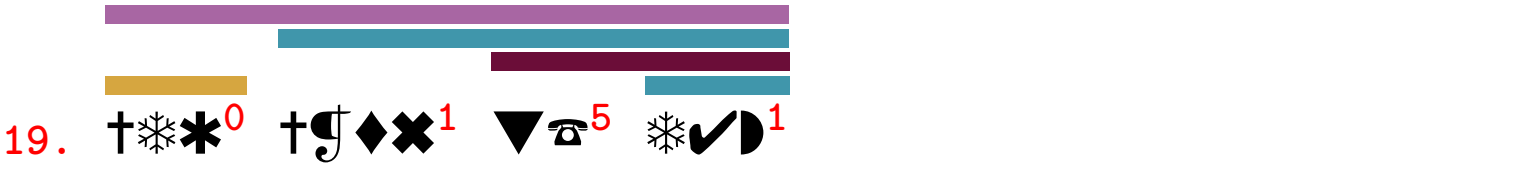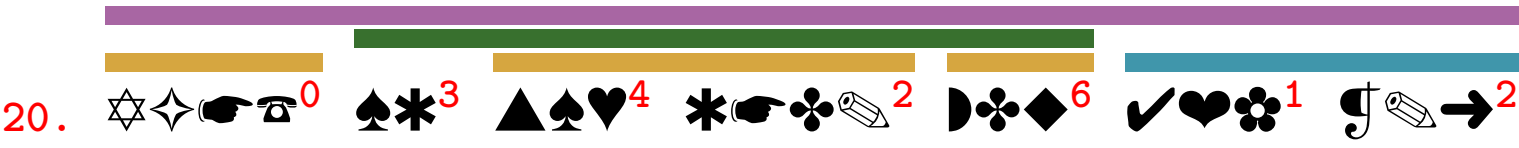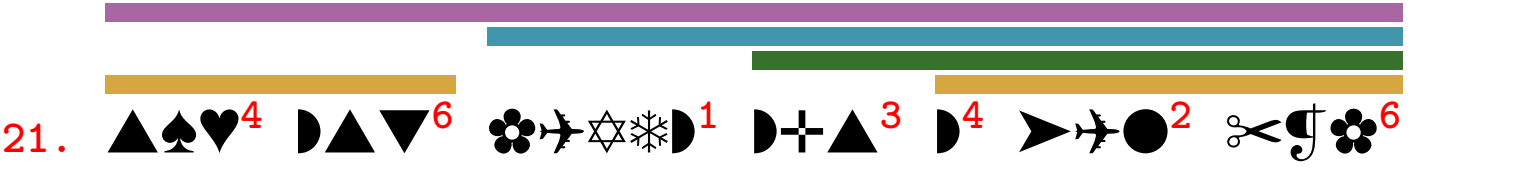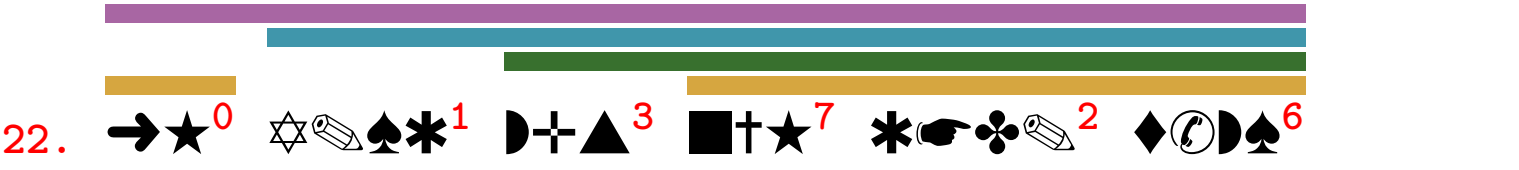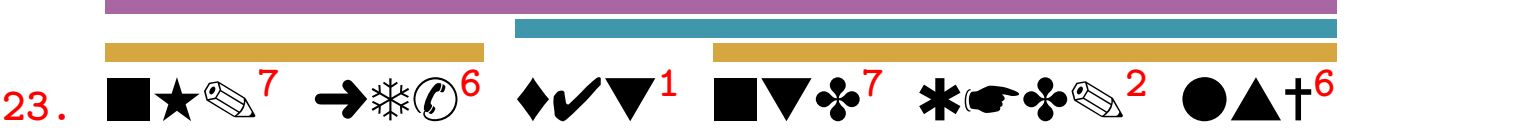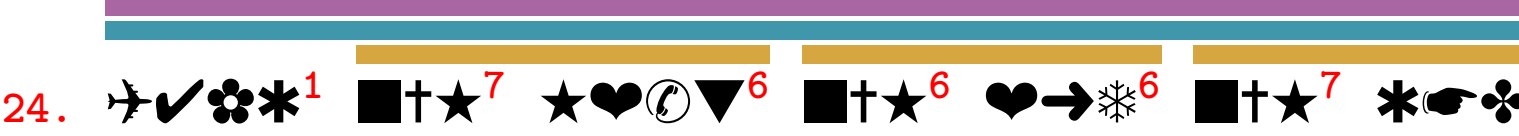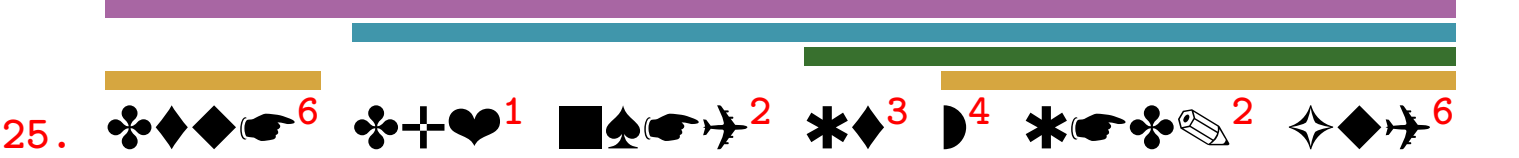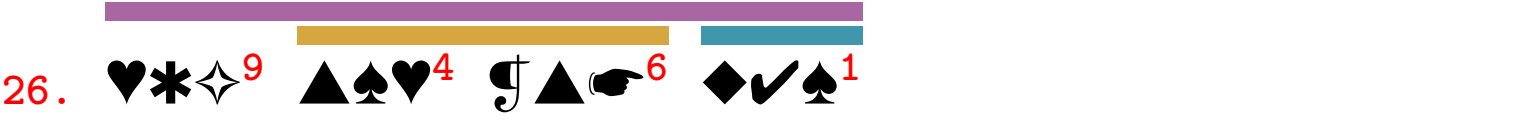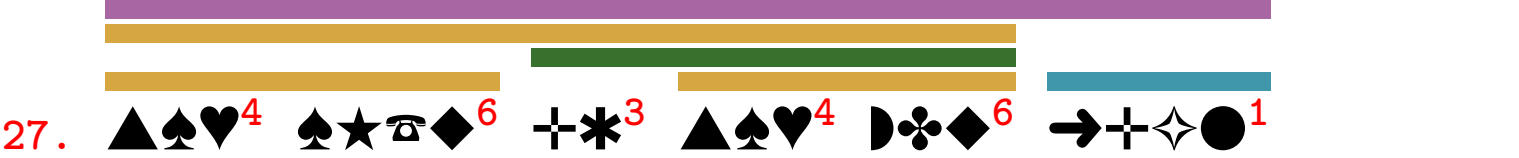

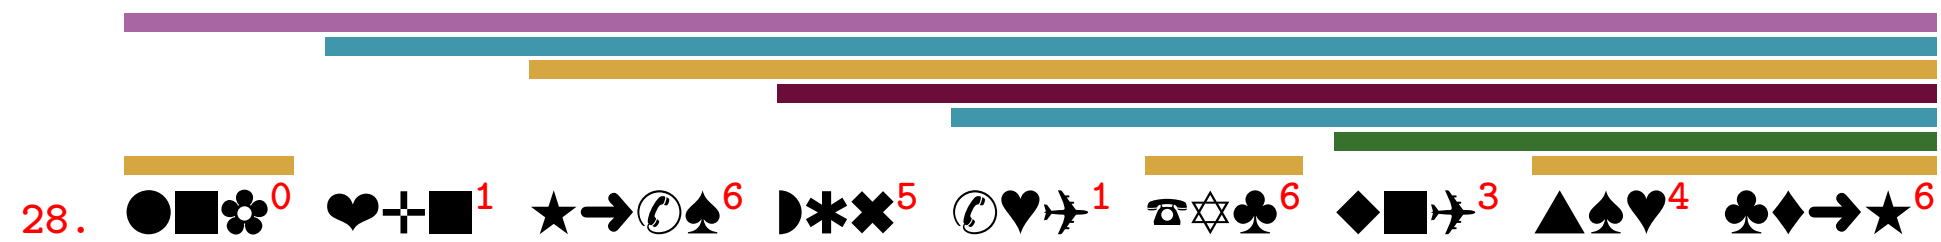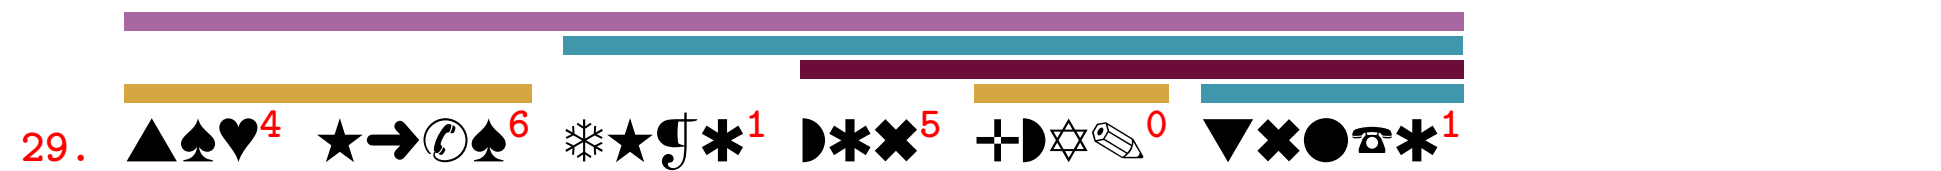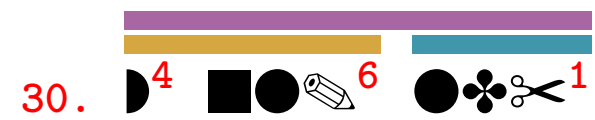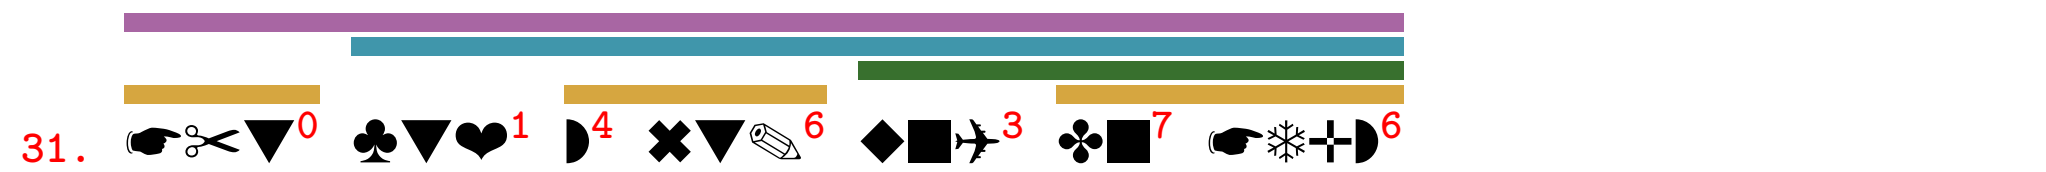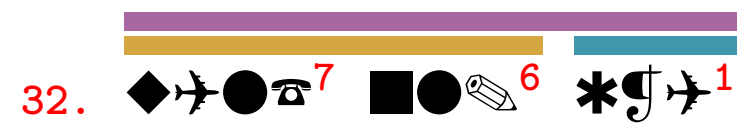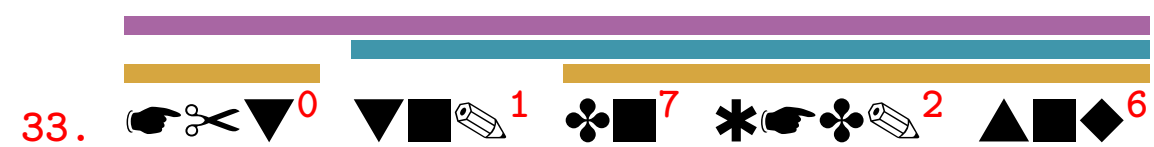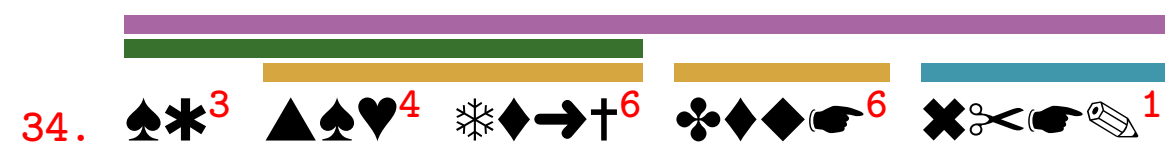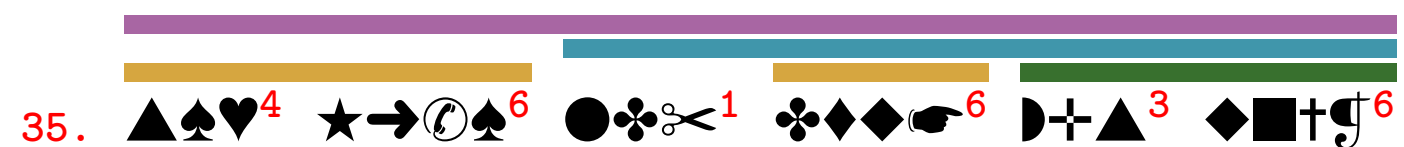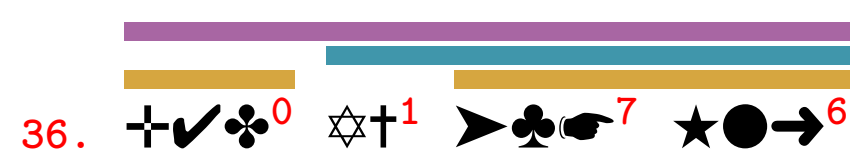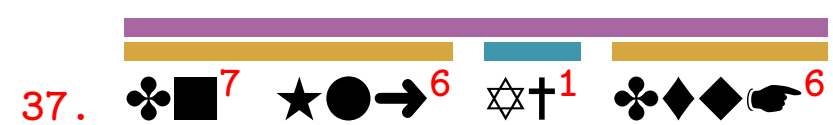

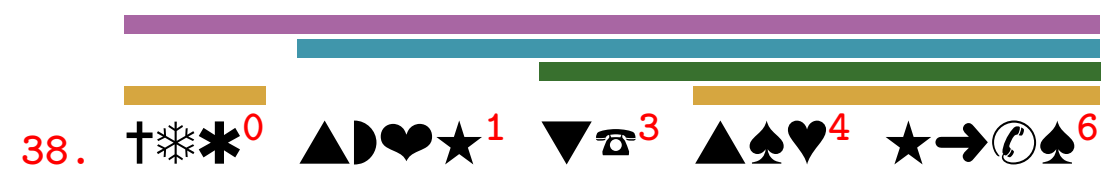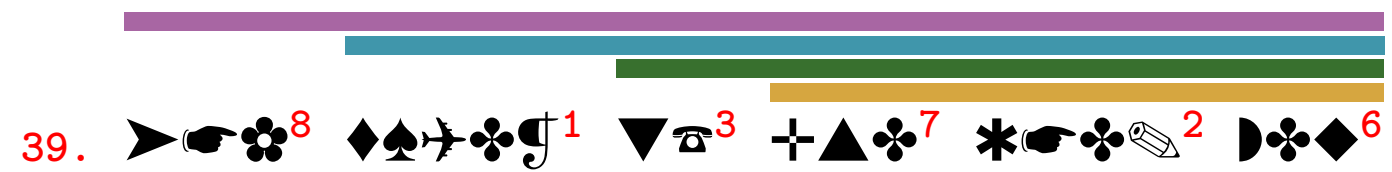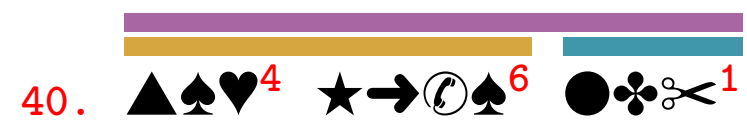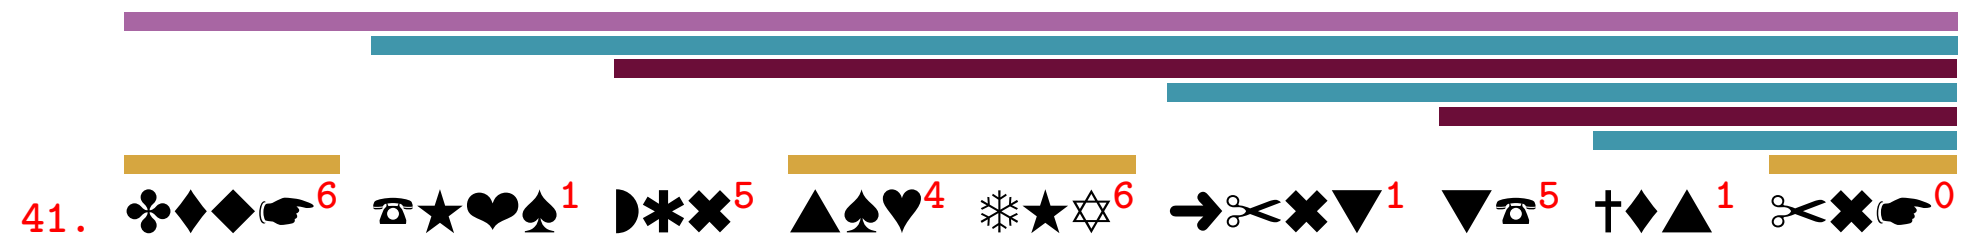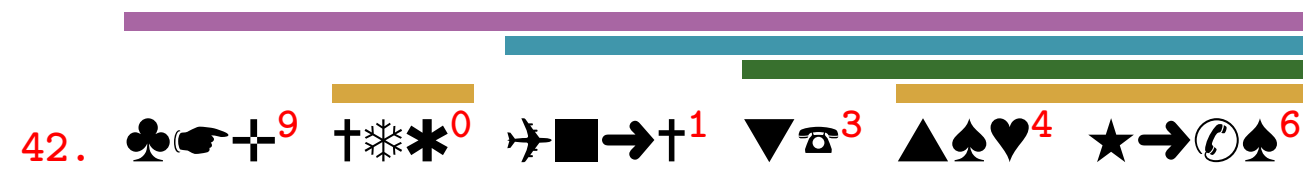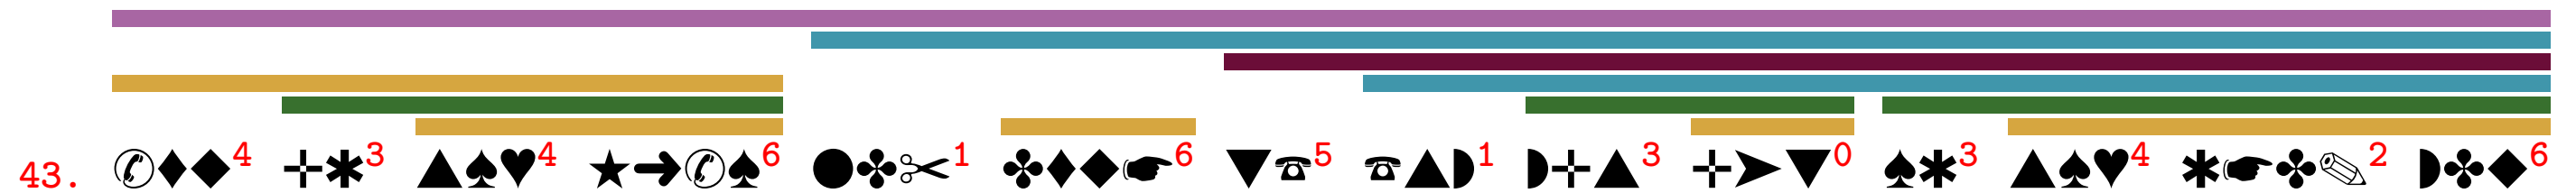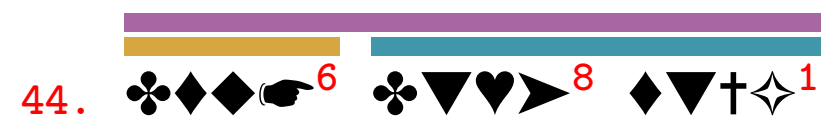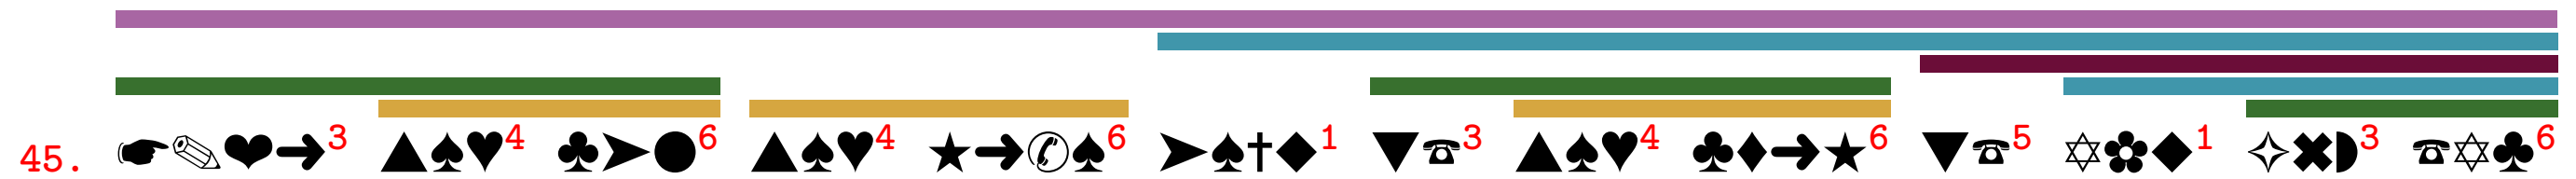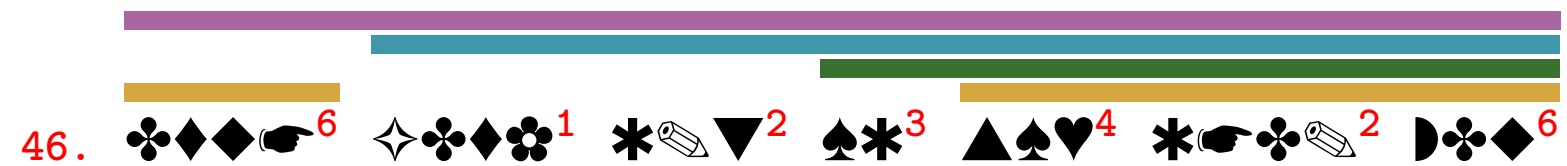

A horizontal bar chart showing the distribution of symbols across five categories. The categories are represented by colored bars: purple, blue, yellow, green, and orange. Below each bar, symbols are listed with their counts.

| Category (Bar Color) | Symbols and Counts                                                  |
|----------------------|---------------------------------------------------------------------|
| Purple               | 4 triangles, 4 spades, 4 hearts, 4 snowflakes, 6 stars, 6 hexagrams |
| Blue                 | 1 heart, 1 club, 1 diamond, 1 snowflake                             |
| Yellow               | 4 triangles, 4 spades, 4 hearts, 4 clubs, 4 stars, 6 hexagrams      |
| Green                | 3 plus signs, 3 asterisks                                           |
| Orange               | 4 triangles, 4 spades, 4 hearts, 4 checkmarks, 4 stars, 4 hearts    |




8

0




1




6




0

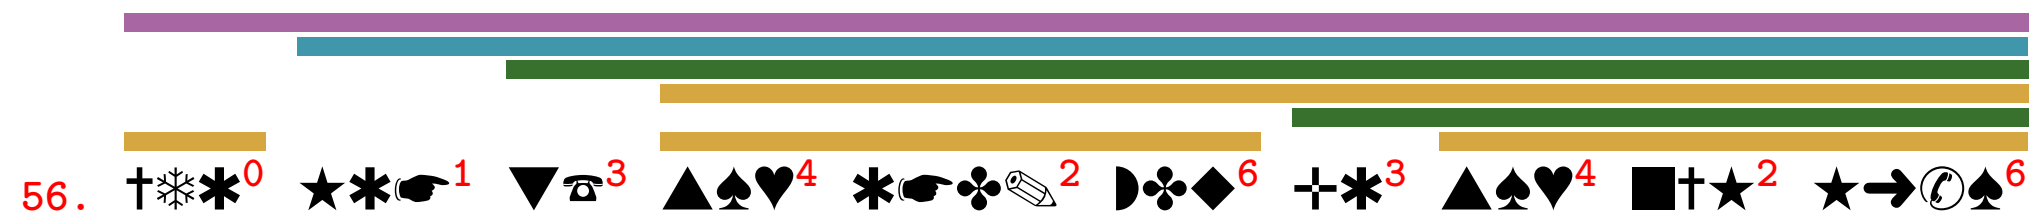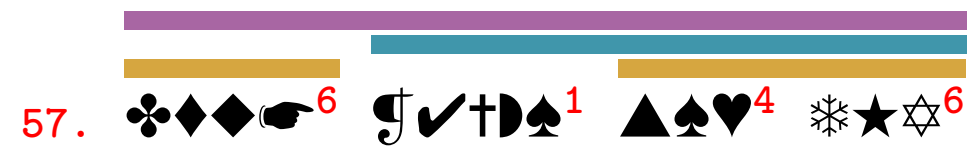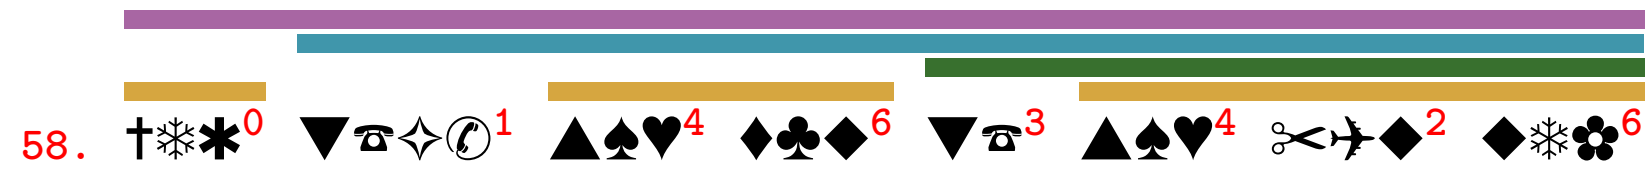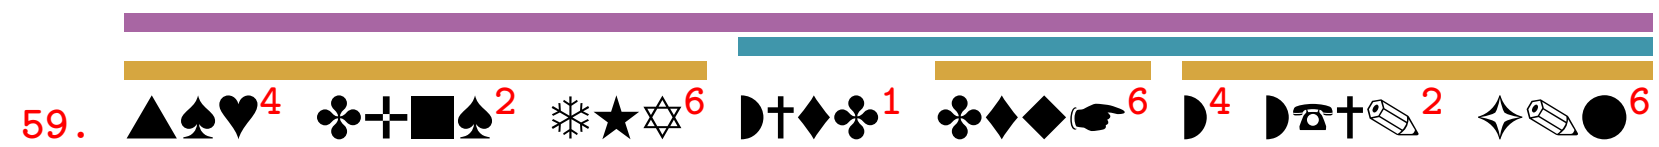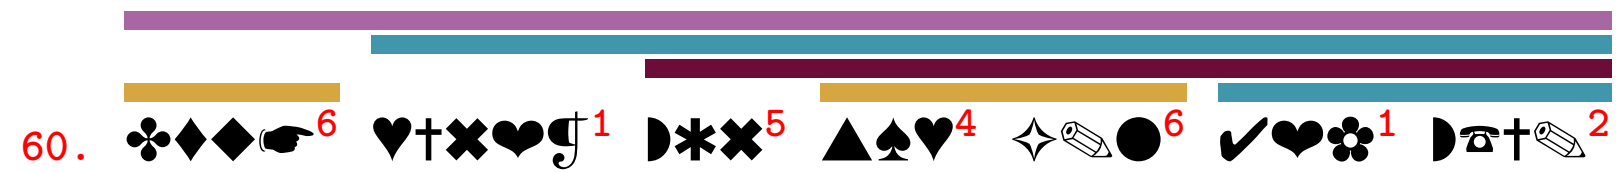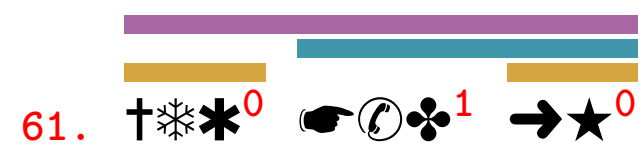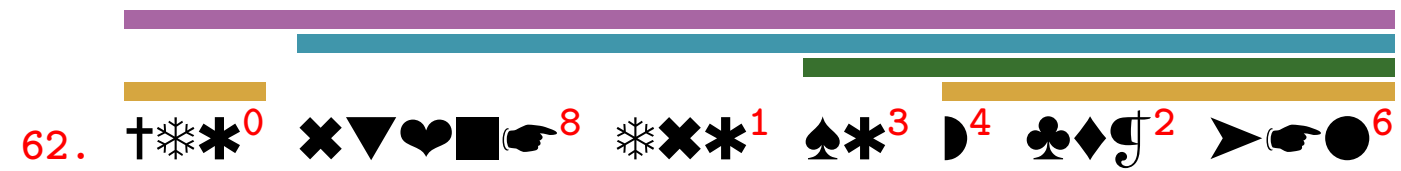

Supplement: OptionalSupplementaryMaterial [file Biancaneve_en_dings_translated.pdf › materials/out/Biancaneve_en_dings_translated.pdf]
