# Supplementary material
Source: ML conference proceedings conference paper supplement (https://aclanthology.org/2021.teachingnlp-1.7)
Supplement: OptionalSupplementaryMaterial [file 0210_cleartext.pdf › materials/out/0210_cleartext.pdf]

in un giorno nevoso una regina cuciva in silenzio a la finestra

dopo qualche tempo la regina ebbe una bambina candida come la neve

il re e la regina chiamarono la bambina biancaneve

dopo la morte di la regina una altra donna sposò il re

la donna possedeva uno specchio un giorno la donna chiese a lo specchio

chi è bella senza rivali in questo castello lo specchio rispose a la regina

tu sei bella senza rivali

dopo qualche tempo la regina chiese ancora a lo specchio

chi è bella senza rivali in questo castello

lo specchio disse

biancaneve è bella senza rivali in questo castello

la regina gelosa diede ordine a un cacciatore di uccidere biancaneve

ma la ragazza riuscì a scappare in il bosco

di sera biancaneve vide una piccola casa e entrò per riposare ogni cosa in la casa era minuscola

il tavolino era coperto da una tovaglia candida era apparecchiato con sette piattini

ogni piattino aveva il suo cucchiaino

ci erano sette coltelli sette forchette sette bicchierini

biancaneve si addormentò su un lettino di sera tornarono i padroni di casa

erano nani che estraevano l oro da i monti

i nani si accorsero che qualcuno era entrato  
il primo disse chi ha dato un morso a il mio panino  
il secondo disse a un altro nano  
chi ha usato la mia forchettina di mattina biancaneve si svegliò  
i nani chiesero a biancaneve con gentilezza Come ti chiami  
mi chiamo biancaneve biancaneve rispose a i nani  
come sei arrivata in la nostra casina i nani chiesero con curiosità  
biancaneve iniziò a raccontare la sua storia la regina diede ordine di ucciderla ma lei era scappata  
un nano chiese a biancaneve di rimanere con loro in la casina biancaneve accettò felice e diede  
un bacio a ogni nano  
di giorno i nani andavano su i monti a cercare l oro  
biancaneve era solita rimanere sola in la casina  
lei cuciva e leggeva quando era in la casina  
intanto in il castello la regina chiedeva a lo specchio  
chi è bella senza rivali in questo castello  
quel giorno la risposta di lo specchio fu  
in il castello tu non hai rivali  
ma disse biancaneve è bella senza rivali in la casina la regina capì l inganno di il cacciatore e  
allora ucciderò Biancaneve io stessa  
la regina preparò una pozione avvelenata e si travestì da vecchia strega

andò a la casina di i sette nani biancaneve non riconobbe la regina  
aprì la porta a la vecchia la regina travestita chiese a biancaneve  
desideri una mela  
e biancaneve non sapeva che la mela era avvelenata la ragazza diede un morso a la mela avvelenata  
cadde subito in un sonno profondissimo  
la sera i nani tornarono a casa e trovarono la ragazza svenuta  
un nano riconobbe la magia di la regina  
il nano preparò un lettino a biancaneve un giorno arrivò un principe  
il principe diede un bacio a biancaneve e spezzò la magia  
la ragazza si svegliò felice
