# Supplementary material
Source: ML conference proceedings conference paper supplement (https://aclanthology.org/2021.teachingnlp-1.7)
Supplement: OptionalSupplementaryMaterial [file 0210_dings_cards_activity_1.even.pdf › materials/tmp/0210_dings_cards_activity_1.even.pdf]

*il*

*il*

*lo*

*lo*

*lo*

*la*

*la*

*l*



*l*

*l*

*i*

*i*

*un*

*un*

*un*

*uno*



*uno*

*una*

*una*

*una*

*quel*

*e*

*e*

*in*



*in*

*a*

*di*

*di*

*con*

*lei*

*lei*

*non*



*inganno*

*donna*

*biancaneve*

*specchio*

*principe*

*giorno*

*morso*

*gentilezza*



*bacio*

*ragazza*

*chiese*

*rispose*

*diede*

*disse*

*riconobbe*

*candida*



*felice*

*ordinò*
