# Supplementary material
Source: ML conference proceedings conference paper supplement (https://aclanthology.org/2021.teachingnlp-1.7)
Supplement: OptionalSupplementaryMaterial [file 0210_dings_cards_activity_1.odd.pdf › materials/tmp/0210_dings_cards_activity_1.odd.pdf]

*il*

*il*

*il*

*lo*

*lo*

*la*

*la*

*la*

*l*

*l*

*i*

*i*

*i*

*un*

*un*

*uno*

*uno*

*uno*

*una*

*una*

*quel*

*e*

*e*

*e*

*in*

*a*

*a*

*di*

*con*

*con*

*lei*

*non*

*non*

*nani*

*bambina*

*regina*

*re*

*casina*

*sera*

*mela*

*bosco*

*finestra*

*ordine*

*chiesero*

*era*

*si svegliò*

*spezzò*

*correva*

*avvelenata*

*foresta*

*ha dato*
