# Supplementary material
Source: ML conference proceedings conference paper supplement (https://aclanthology.org/2021.teachingnlp-1.7)
Supplement: OptionalSupplementaryMaterial [file 0210_dings_cards_activity_1.pdf › materials/tmp/0210_dings_cards_activity_1.pdf]

*il*

*il*

*il*

*il*

*il*

*lo*

*lo*

*lo*



*lo*

*lo*

*la*

*la*

*la*

*la*

*la*

*l*



*l*

*l*

*l*

*l*

*i*

*i*

*i*

*i*



*i*

*un*

*un*

*un*

*un*

*un*

*uno*

*uno*



*uno*

*uno*

*uno*

*una*

*una*

*una*

*una*

*una*



*quel*

*quel*

*e*

*e*

*e*

*e*

*e*

*in*



*in*

*in*

*a*

*a*

*a*

*di*

*di*

*di*



*con*

*con*

*con*

*lei*

*lei*

*lei*

*non*

*non*



*non*

*inganno*

*nani*

*donna*

*bambina*

*biancaneve*

*regina*

*specchio*



*re*

*principe*

*casina*

*giorno*

*sera*

*morso*

*mela*

*gentilezza*



*bosco*

*bacio*

*finestra*

*ragazza*

*ordine*

*chiese*

*chiesero*

*rispose*



*era*

*diede*

*si svegliò*

*disse*

*spezzò*

*riconobbe*

*correva*

*candida*



*avvenata*

*felice*

*foresta*

*ordinò*

*ha dato*
