# Supplementary material
Source: ML conference proceedings conference paper supplement (https://aclanthology.org/2021.teachingnlp-1.7)
Supplement: OptionalSupplementaryMaterial [file 0210_dings_cards_activity_1.shuf-2x2.pdf › materials/tmp/0210_dings_cards_activity_1.shuf-2x2.pdf]

*il*

*il*

*il*

*il*

*lo*

*il*

*lo*

*lo*

*lo*

*lo*

*la*

*la*

$la$

$la$

$l$

$la$

*l*

*l*

*l*

*l*

$i$

$i$

$i$

$i$

*un*

*i*

*un*

*un*

*un*

*un*

*uno*

*uno*



*uno*

*uno*

*una*

*uno*

*una*

*una*

*una*

*una*

*quel*

*e*

*quel*

*e*

$e$

$e$

$i\eta$

$e$

*in*

*in*

*a*

*a*

*di*

*a*

*di*

*di*

*con*

*con*

*lei*

*con*

*lei*

*lei*

*non*

*non*



*inganno*

*non*

*donna*

*nani*

*biancaneve*

*bambina*

*specchio*

*regina*

*principe*

*re*

*giorno*

*casina*

*morso*

*sera*

*gentilezza*

*mela*

*bacio*

*bosco*

*ragazza*

*finestra*

*chiese*

*ordine*

*rispose*

*chiesero*

*diede*

*era*

*disse*

*si svegliò*

*riconobbe*

*spezzò*

*candida*

*correva*



*felice*

*avvelenata*

*ordinò*

*foresta*

*ha dato*
