# Supplementary material
Source: ML conference proceedings conference paper supplement (https://aclanthology.org/2021.teachingnlp-1.7)
Supplement: OptionalSupplementaryMaterial [file 0210_dings_cards_activity_1.shuf.pdf › materials/tmp/0210_dings_cards_activity_1.shuf.pdf]

*il*

*il*

*il*

*il*

*lo*

*il*

*lo*

*lo*



*lo*

*lo*

*la*

*la*

*la*

*la*

*l*

*la*



*l*

*l*

*l*

*l*

*i*

*i*

*i*

*i*



*un*

*i*

*un*

*un*

*un*

*un*

*uno*

*uno*



*uno*

*uno*

*una*

*uno*

*una*

*una*

*una*

*una*



*quel*

*quel*

*e*

*e*

*e*

*e*

*in*

*e*



*in*

*in*

*a*

*a*

*di*

*a*

*di*

*di*



*con*

*con*

*lei*

*con*

*lei*

*lei*

*non*

*non*



*inganno*

*non*

*donna*

*nani*

*biancaneve*

*bambina*

*specchio*

*regina*



*principe*

*re*

*giorno*

*casina*

*morso*

*sera*

*gentilezza*

*mela*



*bacio*

*bosco*

*ragazza*

*finestra*

*chiese*

*ordine*

*rispose*

*chiesero*



*diede*

*era*

*disse*

*si svegliò*

*riconobbe*

*spezzò*

*candida*

*correva*



*felice*

*avvelenata*

*ordinò*

*foresta*

*ha dato*
