# Supplementary material
Source: ML conference proceedings conference paper supplement (https://aclanthology.org/2021.teachingnlp-1.7)
Supplement: OptionalSupplementaryMaterial [file 0210_dings_cards_activity_2.pdf › materials/out/0210_dings_cards_activity_2.pdf]

$il$

R

$il$

R

$il$

R

$il$

R

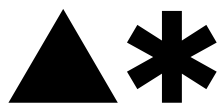

4

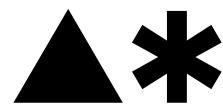

4

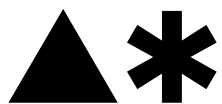

4

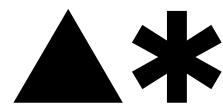

4

$l o$

R

$i l$

R

$l o$

R

$l o$

R

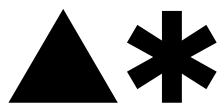

4

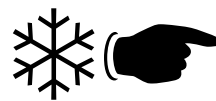

4

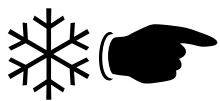

4

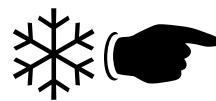

4

$l o$

R

$l a$

R

$l o$

R

$l a$

R

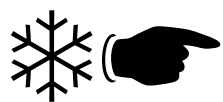

4

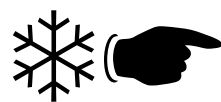

4

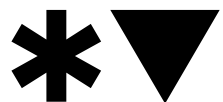

4

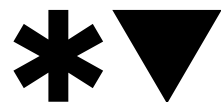

4

$la$

R

$l$

R

$la$

R

$la$

R

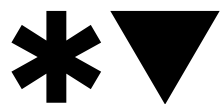

4

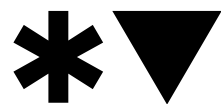

4

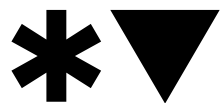

4

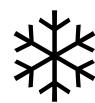

4

$l$   
 $R$

$l$   
 $R$

$l$   
 $R$

$l$   
 $R$

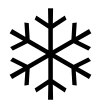

4

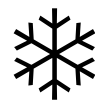

4

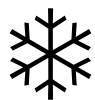

4

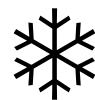

4

$i$   
 $\mathbb{R}$

$i$   
 $\mathbb{R}$

$i$   
 $\mathbb{R}$

$i$   
 $\mathbb{R}$

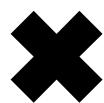

4

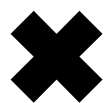

4

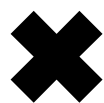

4

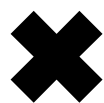

4

*un*

R

*i*

R

*un*

R

*un*

R

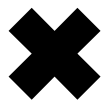

4

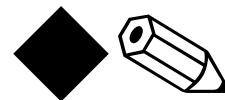

4

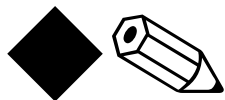

4

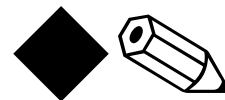

4

*un*

R

*un*

R

*uno*

R

*uno*

R

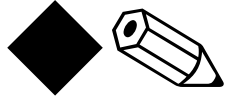

4

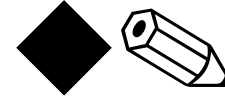

4

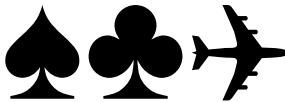

4

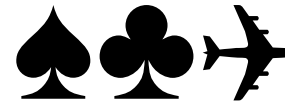

4

*uno*

R

*uno*

R

*una*

R

*uno*

R

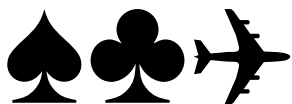

4

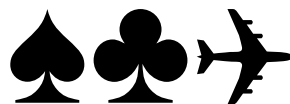

4

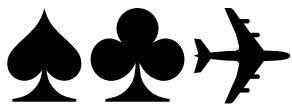

4

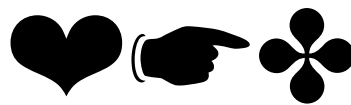

4

*una*

R

*una*

R

*una*

R

*una*

R

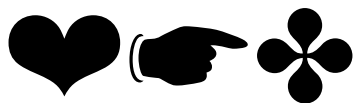

4

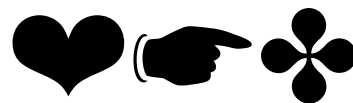

4

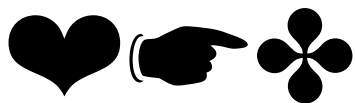

4

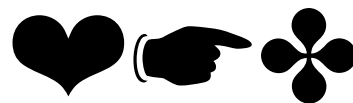

4

*quel*

D

*quel*

D

*questo*

D

*questo*

D

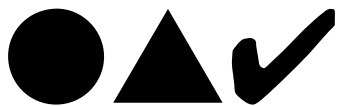

7

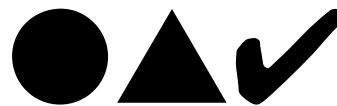

7

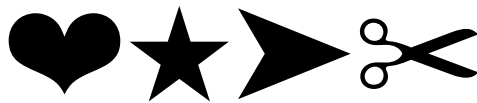

7

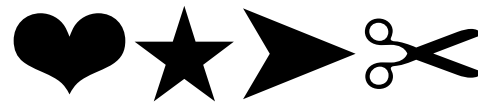

7

*ogni*

D

*e*

C

*ogni*

D

*e*

C

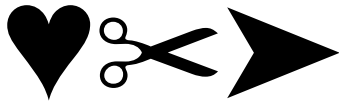

7

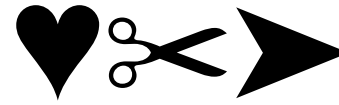

7

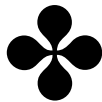

9

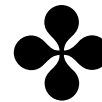

9

*e*  
C

*e*  
C

*ma*  
C

*e*  
C

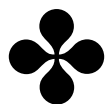

9

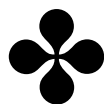

9

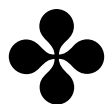

9

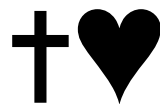

9

*ma*

C

*in*

E

*ma*

C

*in*

E

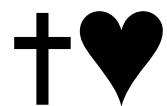

9

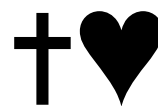

9

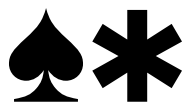

3

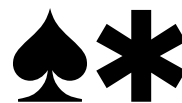

3

*a*

E

*in*

E

*a*

E

*a*

E

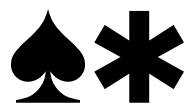

3

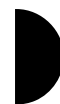

3

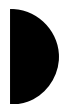

3

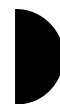

3

*di*

E

*di*

E

*con*

E

*di*

E

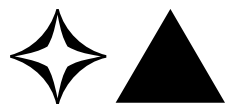

3

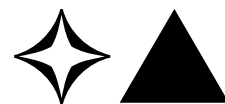

3

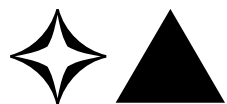

3

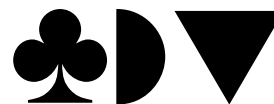

3

*con*

E

*lei*

P

*con*

E

*lei*

P

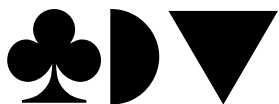

3

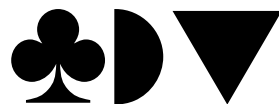

3

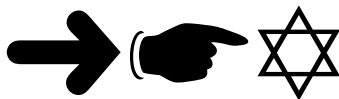

0

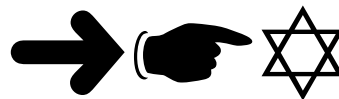

0

*lui*

P

*lei*

P

*lui*

P

*lui*

P

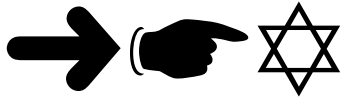

0

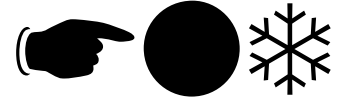

0

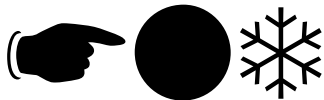

0

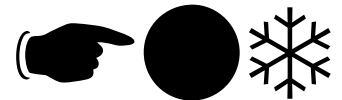

0

*chi*

P

*non*

B

*chi*

P

*chi*

P

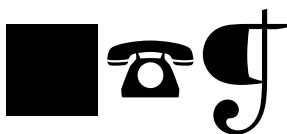

0

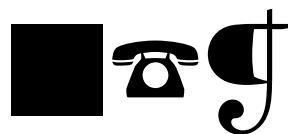

0

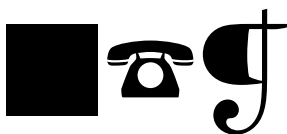

0

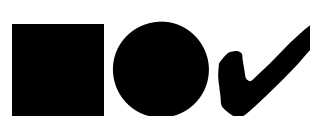

8

*non*

B

*non*

B

*nani*

S

*inganno*

S

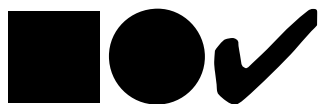

8

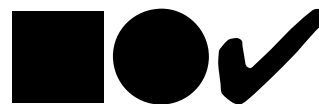

8

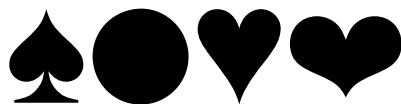

6

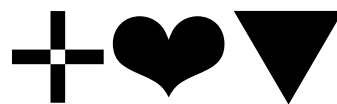

6

*bambina*

S

*donna*

S

*regina*

S

*biancaneve*

S

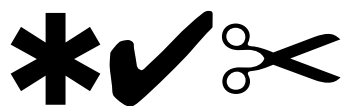

6

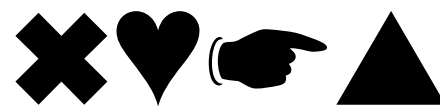

6

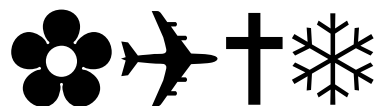

6

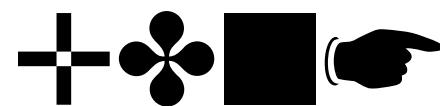

6

*re*

S

*specchio*

S

*casina*

S

*principe*

S

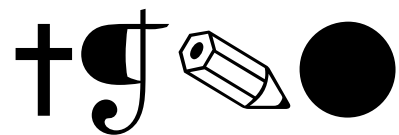

6

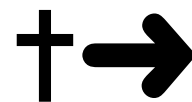

6

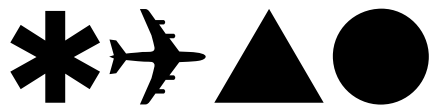

6

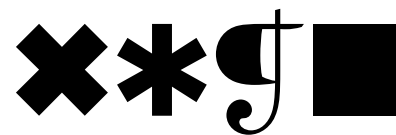

6

*sera*

S

*giorno*

S

*mela*

S

*morso*

S

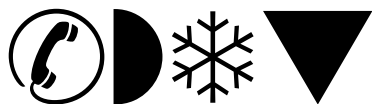

6

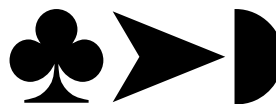

6

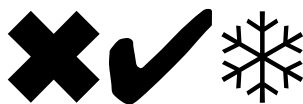

6

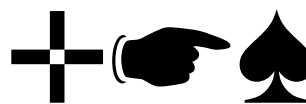

6

*bosco*

S

*gentilezza*

S

*finestra*

S

*bacio*

S

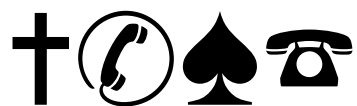

6

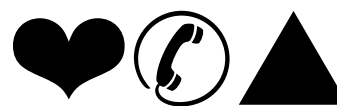

6

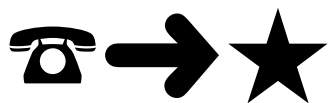

6

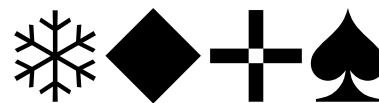

6

*ordine*

S

*ragazza*

S

*volpe*

S

*albero*

S

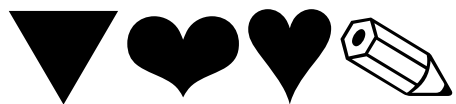

6

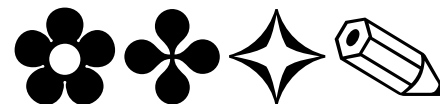

6

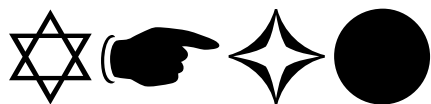

6

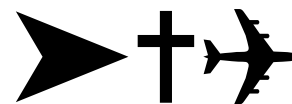

6

*chiese*

V

*bambino*

S

*rispose*

V

*chiesero*

V

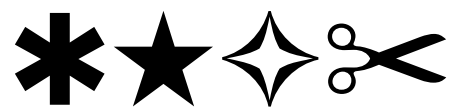

6

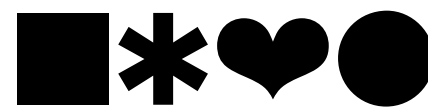

1

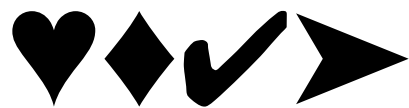

1

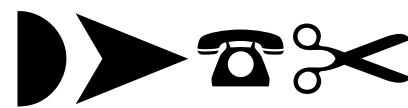

1

*diede*

V

*era*

V

*disse*

V

*si svegliò*

V

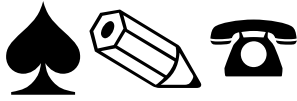

1

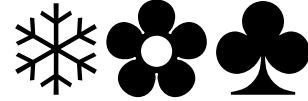

1

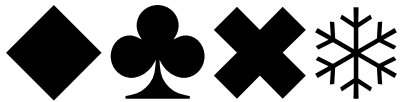

1

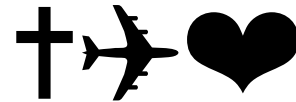

1

*riconobbe*

V

*spezzò*

V

*comprò*

V

*correva*

V

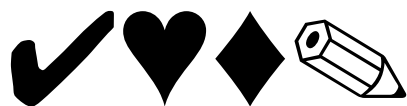

1

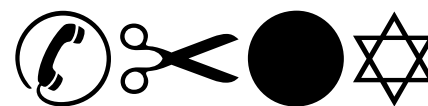

1

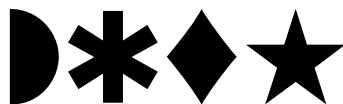

1

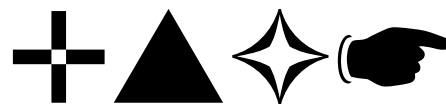

1

*avvelenata*

A

*candida*

A

*triste*

A

*felice*

A

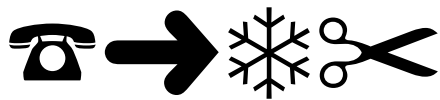

2

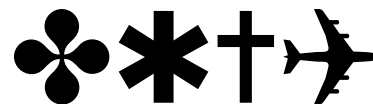

2

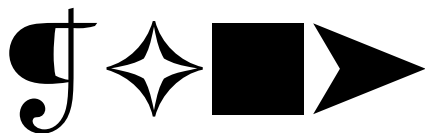

2

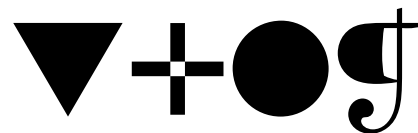

2

*che*

Z

*di*

Z

*per*

Z



5

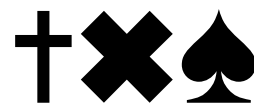

5

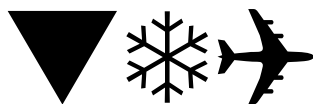

5
