# Supplementary material
Source: ML conference proceedings conference paper supplement (https://aclanthology.org/2021.teachingnlp-1.7)
Supplement: OptionalSupplementaryMaterial [file 0210_dings_dict.pdf › materials/out/0210_dings_dict.pdf]

# === WORD DICTIONARY

===

❄ 1  
 ❄♦+♠ finestra  
 ❄♦→† strega  
 ❄☞ lo  
 ❄✓D primo  
 ❄★♣ monti  
 ❄★☆♦ silenzio  
 ❄♣♣ diede  
 ●■♣✈ castello  
 ●▲✓ quel  
 ●▲†☆ iniziò  
 ●♠▼ erano  
 ●♣✂❄ ci erano  
 ■●✎† allora  
 ■●✓ non  
 ■▼♣\* curiosità  
 ■♠☞✈ rimanere  
 ■☞♣ chi  
 ■†★→ ti chiami  
 ■★✎●D sei arrivata  
 ■\*♥● chiese  
 ▲■♦✎ vecchia  
 ▲D♥★ coltelli  
 ▲♠♥ morte  
 ▲☞✓♦ riuscì  
 ▲✓★♥♣ bicchierini  
 ▲\* il  
 ▼❄✈ per  
 ▼■✎\*♦ si travestì  
 ▼♥♥✎ ragazza  
 ▼☞♠♣ piattino

▼✕● capì  
 ▼+●♣ triste  
 ♦❄☞ dopo  
 ♦❄♣ vide  
 ♦■✈❄ risposta  
 ♦■† aprì  
 ♦■\*☞ nevoso  
 ♦♣❄ sette  
 ♦♣✕❄ si svegliò  
 ♦✈●☞ preparò  
 ♦✎ un  
 ♦✎♣ sposò  
 ♦✓♠ oro  
 D a  
 D▲▼ altro  
 D➤☞✂ rispose  
 D✓+♣ padroni  
 D+▲♥ ha usato  
 D♣♦➤ qualcuno  
 D\*♦★ correva  
 D\*✕■ quando  
 ♣▲☞♣ andavano  
 ♣✎➤☞ secondo  
 ♣✧■➤ felice  
 ♥➤❄▼ storia  
 ♥☞▲ bosco  
 ♥☞♣ una  
 ♥+■ sola  
 ♥★➤✂ questo  
 ♣▼♥✓ ucciderò  
 ♣D▼ con  
 ♣♦ fu  
 ♣♠✂<† ordinò

♣➤●❄ cuciva

♣➤♠ sera

♣☞ su

♦♠✈ cadde

♦Ⓢ♠ mi chiamo

♦✓▼ altra

♥♦✂ ebbe

♥♦✓➤ chiesero

♥✂➤ ogni

♥\*✧ entrò

♠●♥♥ inganno

♠▼❁ senza

♠♣✈ uno

♠✎☎ era

♠★☎♦ cercare

♠\* in

➔❄Ⓢ☎ nostra

➔▼♥♠ foresta

➔✂✕▼● profondissimo

➔☞☆ lei

➔✎Ⓢ✕ possedeva

➔✚✧● era solita

➔★✓☆Ⓢ forchettina

➤ è

➤♣☞✚ travestita

➤➔ da

➤☞❁▲ sapeva

➤✎♦☆ qualche

➤✚✈ volpe

✂▼● come

✂♠❁ mia

✂✕☞ tempo

✂✚♣ sei

☎▲♠❁ svenuta

☎➔❄✂ candida

☎➔★ bacio

☎➔❁ suo

☎✚♥\* scappare

☎☆♣✧ chiedeva

☎★♥ sonno

Ⓢ♠❄▼ giorno

Ⓢ♣☞♥ piattini

Ⓢ♦♦❄ trovarono

Ⓢ♥✈▲ intanto

Ⓢ✂●☆ riconobbe

Ⓢ✓♦✕ gelosa

Ⓢ✕✓➤ minuscola

✈■➔✚ tornarono

✈Ⓢ♣➔ ha dato

✈✓❁\* raccontare

✈✚ tu

☞❄✚♠ stessa

☞●❄ lui

☞■♥ aveva

☞✂▼❄ tavolino

✎❄✓Ⓢ♥ era

apparecchiato

✓♥❁♣ panino

✓♥♦✎ spezzò

✓✚☎✂ tovaglia

✓★✂ neve

✕ i

✕▼ io

✕♥☞▲ bambina

✕✂☞ andò

✕✓❄ morso

✕\*♣■ casina  
 +▲♣■ subito  
 +▲✧☞ comprò  
 +♠● casa  
 +♠♣■ estraevano  
 +♠☆ hai  
 +♥▼ nani  
 +➤▼ magia  
 +☞♠ mela  
 +✓♣ porta  
 +♣■☞ regina  
 +\*➤➤ cacciatore  
 †\*♣▼ riposare  
 †♣♦✕♣ era entrato  
 †♣☞● specchio  
 †♦▲✂+ si addormentò  
 †♥ ma  
 †➤ re  
 †☞♠☞ gentilezza  
 †☞♥ disse  
 †✕♠ che  
 †♣\*♦ piccola  
 ☆☞✧● albero  
 ☆☞♠\* mattina  
 ☆+▼☞ chiamarono  
 ☆†♠✕ era coperto  
 ☆✧☞ mio  
 ♣ e  
 ♣\*♦♥ lettino  
 ♣■♠♠ cucchiaino  
 ♣▲♣+ uccidere  
 ♣▼♥➤ arrivò  
 ♣♥☞♦ rivali

♣♦♦☞ ancora  
 ♣+♥☞ era  
 scappata  
 ♣\*†☞ avvelenata  
 ✧▲ di  
 ✧♦☞▼ accettò  
 ★●➤♣ desideri  
 ★♥☞ sua  
 ★➤☞♠ leggeva  
 ★➤♣\* forchette  
 ★✓☞\* ucciderla  
 \*▼ la  
 \*♣☞\* pozione  
 \*♦☞ loro  
 \*☞▲● principe  
 \*☞♣☞✕ si  
 accorsero  
 \*✓✂ donna  
 \*★✧✂ bambino  
 ♣●♣ bella  
 ♣☞†\* biancaneve  
 ♣☞☆ nano  
 ♣☞♦ cosa  
 ♣♣✧☞ ordine  
 === POS DICTIONARY  
 ===  
 A 2  
 B 8  
 C 9  
 D 7  
 E 3  
 P 0  
 R 4

|   |   |
|---|---|
| S | 6 |
| V | 1 |
| Z | 5 |
