# Supplementary material
Source: ML conference proceedings conference paper supplement (https://aclanthology.org/2021.teachingnlp-1.7)
Supplement: OptionalSupplementaryMaterial [file 0210_letters_cards_activity_1.pdf › materials/out/0210_letters_cards_activity_1.pdf]

*il*

*il*

*il*

*il*

tmo

tmo

tmo

tmo

*lo*

*il*

*lo*

*lo*

tmo

set

set

set

*lo*

*lo*

*la*

*la*

set

set

csy

csy

$la$

$la$

$l$

$la$

csy

csy

csy

at



*l*

*l*

*l*

*l*

at

at

at

at

$i$

$i$

$i$

$i$

ec

ec

ec

ec

*un*

*i*

*un*

*un*

ec

pry

pry

pry

*un*

*un*

*uno*

*uno*

pry

pry

yram

yram



*uno*

*uno*

*una*

*uno*

yram

yram

yram

olme

*una*

*una*

*una*

*una*

olme

olme

olme

olme

*quel*

*e*

*quel*

*e*

tmym

sa

tmym

sa

$e$

$e$

$i\eta$

$e$

sa

sa

sa

tyr



*in*

*in*

*a*

*a*

tyr

tyr

re

re

*di*

*a*

*di*

*di*

re

oso

oso

oso

*con*

*con*

*lei*

*con*

memy

memy

memy

ocso

*lei*

*lei*

*non*

*non*

OCsO

OCsO

yCsO

yCsO



*inganno*

*non*

*donna*

*nani*

ycso

ecyvy

stym

temym

*biancaneve*

*bambina*

*specchio*

*regina*

kyrma

cykalys

polce

alcemo

*principe*

*re*

*giorno*

*casina*

cer

prolep

atyme

ysocy

*morso*

*sera*

*gentilezza*

*mela*

elyk

cympa

race

sataspa



*bacio*

*bosco*

*ragazza*

*finestra*

tmove

evryv

atykyv

potmy

*chiese*

*ordine*

*rispose*

*chiesero*

tmesy

sytny

kovoky

elepo

*diede*

*era*

*disse*

*si svegliò*

rapo

cepre

tekasat

cyrlo

*riconobbe*

*spezzò*

*candida*

*correva*

okely

tmympto

omote

otmot



*felice*

*avvelenata*

*ordinò*

*foresta*

celosos

cropa

mtyta

marek

*ha dato*

alope
