# Supplementary material
Source: ML conference proceedings conference paper supplement (https://aclanthology.org/2021.teachingnlp-1.7)
Supplement: OptionalSupplementaryMaterial [file 0210_letters_cards_activity_1_t-2x2.pdf › materials/tmp/0210_letters_cards_activity_1_t-2x2.pdf]

tmo

tmo

tmo

tmo

tmo

set

set

set

set

set

csy

csy

csy

csy

csy

at

at

at

at

at

ec

ec

ec

ec

ec

pry

pry

pry

pry

pry

yram

yram



yram

yram

yram

olme

olme

olme

olme

olme

tmym

sa

tmym

sa

sa

sa

sa

tyr

tyr

tyr

re

re

re

oso

oso

oso

memy

memy

memy

ocso

OCsO

OCsO

yCsO

yCsO



ycso

ecyvy

stym

temym

kyrma

cykalys

polce

alcemo

cer

prolep

atyme

ysocy

elyk

cympa

race

sataspa

tmove

evryv

atykyv

potmy

tmesy

sytny

kovoky

elepo

rapo

cepre

tekasat

cyrlo

okely

tmympto

omote

otmot



celosos

cropa

mtyta

marek

alope
