# Supplementary material
Source: ML conference proceedings conference paper supplement (https://aclanthology.org/2021.teachingnlp-1.7)
Supplement: OptionalSupplementaryMaterial [file 0210_letters_cards_activity_1_t.pdf › materials/tmp/0210_letters_cards_activity_1_t.pdf]

tmo

tmo

tmo

tmo

tmo

set

set

set



set

set

CSy

csy

csy

csy

CSy

at



at

at

at

at

ec

ec

ec

ec



ec

pry

pry

pry

pry

pry

yram

yram



yram

yram

yram

olme

olme

olme

olme

olme



tmy

tmy

sa

sa

sa

sa

sa

tyr



tyr

tyr

re

re

re

OSO

OSO

OSO



memy

memy

memy

OCSO

OCsO

OCSO

*y*CSO

*y*CSO



*y*CSO

ecyyvy

stym

temym

kyrma

cykalys

police

alcemo



cer

prolep

atyme

*ysocy*

elyk

супра

race

sataspā



tmove

evryv

atykyv

potmy

tmesy

sytmy

kovoky

e1epo



rapo

cepre

tekasat

cyr1o

okely

tmypo

omote

otmot



celosos

croPa

mtyta

marek

alope
