# Supplementary material
Source: ML conference proceedings conference paper supplement (https://aclanthology.org/2021.teachingnlp-1.7)
Supplement: OptionalSupplementaryMaterial [file 0210_letters_cards_activity_2.pdf › materials/out/0210_letters_cards_activity_2.pdf]

$il$

R

$il$

R

$il$

R

$il$

R

tmo

4

tmo

4

tmo

4

tmo

4

*lo*

R

*il*

R

*lo*

R

*lo*

R

tmo

4

set

4

set

4

set

4

$l o$

R

$l a$

R

$l o$

R

$l a$

R

set

4

set

4

csy

4

csy

4

$la$

R

$l$

R

$la$

R

$la$

R

csy

4

csy

4

csy

4

at

4



$l$   
 $R$

$l$   
 $R$

$l$   
 $R$

$l$   
 $R$

at

4

at

4

at

4

at

4

$i$   
 $\mathbb{R}$

$i$   
 $\mathbb{R}$

$i$   
 $\mathbb{R}$

$i$   
 $\mathbb{R}$

ec

4

ec

4

ec

4

ec

4

$un$

R

$i$

R

$un$

R

$un$

R

ec

4

pry

4

pry

4

pry

4

*un*

R

*un*

R

*uno*

R

*uno*

R

pry

4

pry

4

yram

4

yram

4



*uno*

R

*uno*

R

*una*

R

*uno*

R

yram

4

yram

4

yram

4

olme

4

*una*

R

*una*

R

*una*

R

*una*

R

olme

4

olme

4

olme

4

olme

4

*quel*

D

*quel*

D

*questo*

D

*questo*

D

tmym

7

tmym

7

rmopo

7

rmopo

7

*ogni*

D

*e*

C

*ogni*

D

*e*

C

akro

7

sa

9

akro

7

sa

9



*e*  
C

*e*  
C

*ma*  
C

*e*  
C

sa

9

sa

9

sa

9

sot

9

*ma*

C

*in*

E

*ma*

C

*in*

E

sot

9

tyr

3

sot

9

tyr

3

*a*

E

*in*

E

*a*

E

*a*

E

tyr

3

re

3

re

3

re

3

*di*

E

*di*

E

*con*

E

*di*

E

oso

3

oso

3

oso

3

memy

3



*con*

E

*lei*

P

*con*

E

*lei*

P

memy

3

ocso

0

memy

3

ocso

0

*lui*

P

*lei*

P

*lui*

P

*lui*

P

ocso

0

sary

0

sary

0

sary

0

*chi*

P

*non*

B

*chi*

P

*chi*

P

tmos

0

tmos

0

tmos

0

ycso

8

*non*

B

*non*

B

*nani*

S

*inganno*

S

ycso

8

ycso

8

ecyvy

6

stym

6



*bambina*

S

*donna*

S

*regina*

S

*biancaneve*

S

temym

6

kyрма

6

cykalys

6

polce

6

*re*

S

*specchio*

S

*casina*

S

*principe*

S

alcemo

6

cer

6

prolep

6

atyme

6

*sera*

S

*giorno*

S

*mela*

S

*morso*

S

ysocy

6

elyk

6

cympa

6

race

6

*bosco*

S

*gentilezza*

S

*finestra*

S

*bacio*

S

sataspā

6

tmove

6

evryv

6

atykyv

6



*ordine*

S

*ragazza*

S

*volpe*

S

*albero*

S

potmy

6

tmesy

6

ysove

6

vapoc

6

*chiese*

V

*bambino*

S

*rispose*

V

*chiesero*

V

temyc

6

sytny

1

kovoky

1

elepo

1

*diede*

V

*era*

V

*disse*

V

*si svegliò*

V

rapo

1

cepre

1

tekasat

1

cyrlo

1

*riconobbe*

V

*spezzò*

V

*comprò*

V

*correva*

V

okely

1

tmympo

1

omote

1

lmyra

1



*avvelenata*

A

*candida*

A

*triste*

A

*felice*

A

otmot

2

celosos

2

cropa

2

laple

2

*che*

Z

*di*

Z

*per*

Z

oso

5

etoc

5

este

5
