# Supplementary material
Source: ML conference proceedings conference paper supplement (https://aclanthology.org/2021.teachingnlp-1.7)
Supplement: OptionalSupplementaryMaterial [file 0210_letters_cards_activity_2.shuf.pdf › materials/tmp/0210_letters_cards_activity_2.shuf.pdf]

*il*

R

*il*

R

*il*

R

*il*

R

*lo*

R

*il*

R

*lo*

R

*lo*

R



*lo*

R

*lo*

R

*la*

R

*la*

R

*la*

R

*la*

R

*z*

R

*la*

R



*z*

R

*z*

R

*z*

R

*z*

R

*i*

R

*i*

R

*i*

R

*i*

R



*un*

R

*i*

R

*un*

R

*un*

R

*un*

R

*un*

R

*uno*

R

*uno*

R



*uno*

R

*uno*

R

*una*

R

*uno*

R

*una*

R

*una*

R

*una*

R

*una*

R



*quel*

D

*quel*

D

*questo*

D

*questo*

D

*ogni*

D

*ogni*

D

*e*

*c*

*e*

*c*



*e*

*c*

*e*

*c*

*ma*

C

*e*

*c*

*ma*

C

*ma*

C

*in*

E

*in*

E



*a*

E

*in*

E

*a*

E

*a*

E

*di*

E

*di*

E

*con*

E

*di*

E



*con*

E

*con*

E

*lei*

P

*lei*

P

*lui*

P

*lei*

P

*lui*

P

*lui*

P



*chi*

P

*chi*

P

*non*

B

*chi*

P

*non*

B

*non*

B

*nani*

S

*inganno*

S



*bambina*

S

*donna*

S

*regina*

S

*biancaneve*

S

*re*

*S*

*specchio*

S

*casina*

S

*principe*

S



*sera*

S

*giorno*

S

*mela*

S

*morso*

S

*bosco*

*S*

*gentilezza*

S

*finestra*

S

*bacio*

S



*ordine*

S

*ragazza*

S

*volpe*

S

*albero*

S

*chiese*

V

*bambino*

S

*rispose*

V

*chiesero*

V



*diede*

V

*era*

*V*

*disse*

*V*

*si sveglia*

*V*

*riconobbe*

*V*

*spezzò*

*V*

*comprò*

V

*correva*

V



*avvelenata*

A

*candida*

A

*triste*

A

*felice*

A

*che*

Z

*di*

Z

*per*

Z
