# Supplementary material
Source: ML conference proceedings conference paper supplement (https://aclanthology.org/2021.teachingnlp-1.7)
Supplement: OptionalSupplementaryMaterial [file 0210_letters_cards_activity_2_t.pdf › materials/tmp/0210_letters_cards_activity_2_t.pdf]

tmo

4

tmo

4

tmo

4

tmo

4

tmo

4

set

4

set

4

set

4

set

4

set

4

*csy*

4

*csy*

4

*csy*

4

*csy*

4

*csy*

4

at

4

at

4

at

4

at

4

at

4

ec

4

ec

4

ec

4

ec

4

ec

4

pry

4

pry

4

pry

4

pry

4

pry

4

yr am

4

olme

4

olme

4

o1me

4

o1me

4

o1me

4

tmym

7

tmym

7

rmopo

7

rmopo

7

akro

7

akro

7

sa

9

sa

9

sa

9

sa

9

sa

9

sot

9

sot

9

sot

9

tyr

3

tyr

3

tyr

3

re

3

re

3

re

3

oso

3

oso

3

oso

3

memy

3

memy

3

memy

3

o c s o

0

o c s o

0

o c s o

0

sary

0

sary

0

sary

0

tmos

0

tmos

0

tmos

0

$y_{CSO}$

8

$y_{CSO}$

8

$y_{CSO}$

8

*ecyvy*

6

stym

6

temym

6

kyrma

6

cykalys

6

police

6

al cemo

6

cer

6

prolep

6

atyme

6

*ysocy*

6

elyk

6

супра

6

race

6

sataspā

6

tmove

6

evryv

6

atykyv

6

potmy

6

tmesy

6

*ysove*

6

vapor

6

temyc

6

sytmy

1

kovoky

1

elepo

1

rapo

1

cepre

1

tekasat

1

cyrlo

1

okely

1

tmypo

1

omote

1

1myra

1

otmot

2

celosos

2

cropla

2

laple

2

oso

5

etoc

5

este

5
