# Supplementary material
Source: ML conference proceedings conference paper supplement (https://aclanthology.org/2021.teachingnlp-1.7)
Supplement: OptionalSupplementaryMaterial [file 0210_letters_dict.pdf › materials/out/0210_letters_dict.pdf]

=== WORD DICTIONARY  
===

acylyc qualcuno  
akatys riposare  
akro ogni  
alcemo specchio  
alope ha dato  
alylyvo cucchiaino  
alyma monti  
ampo aprì  
amtyr mattina  
aplevap estraevano  
armyka piattini  
asala sette  
asmet quando  
aspe sua  
asyk dopo  
at l  
atykyv finestra  
atyme casina  
avlokot travestita  
celosos avvelenata  
cepre diede  
cer re  
cesevo tornarono  
cetoklo era scappata  
cety sei  
clote bella  
cropa felice  
crova leggeva  
cseky altra  
csy la  
cykalys biancaneve

cympa morso  
cymta porta  
cyrlo disse  
ec i  
ecyvy inganno  
elepo rispose  
elvy casa  
elyk sera  
emy tu  
eply cosa  
esace magia  
esko hai  
esmep arrivò  
este per  
etlol allora  
etmasep era coperto  
etmyce forchette  
etoc che  
evlerar profondissimo  
evryv bacio  
klavra tavolino  
kokev entrò  
kovoky chiesero  
krepa sapeva  
kryl come  
kyрма bambina  
laple triste  
lcyrate era entrato  
lmyra comprò  
lokok morte  
lovevy rimanere  
lvavaro sei arrivata  
lvosyc ucciderò

ma è  
maky mio  
marek ordinò  
memy con  
motym cercare  
mpa da  
mpokem risposta  
mtace erano  
mtyta foresta  
myrok storia  
ocely iniziò  
ocso lei  
ocyso strega  
okalo sposò  
okely spezzò  
olme una  
olpok stessa  
omaka cuciva  
omote correva  
oplo capì  
oplosa trovarono  
oplymy piattino  
oprepol forchettina  
oprom tempo  
orce andò  
orykyko si addormentò  
oso di  
ostom pozione  
otese primo  
otmos padroni  
otmot candida  
palo nano  
parcy nevoso

pepero chiedeva  
pevaret si travestì  
plac neve  
polce regina  
potmy ragazza  
prolep principe  
provyt curiosità  
pry un  
pryk ebbe  
pryre preparò  
race mela  
rapo era  
re a  
rmopo questo  
rmyc loro  
rmym sola  
rmyvas scappare  
rokyl piccola  
rpolce coltelli  
rpotme uccidere  
rvamty mi chiamo  
rvyse vecchia  
ryvysy andavano  
sa e  
sary lui  
sataspa gentilezza  
set lo  
skorcy minuscola  
sokarmo chiamarono  
sot ma  
sposo lettino  
stepa senza  
stykos silenzio

styly accettò  
 stym nani  
 syk io  
 sytmy chiese  
 tavro intanto  
 tekasat si svegliò  
 temte altro  
 temyc bambino  
 temym donna  
 tepro svenuta  
 tlacy nostra  
 tlocy qualche  
 tlokoc ha usato  
 tmemoce raccontare  
 tmesy ordine  
 tmo il  
 tmos chi  
 tmotmoky era  
 apparecchiato  
 tmove bosco  
 tmym quel  
 tmympo riconobbe  
 tmyrom tovaglia  
 tyl fu  
 tyr in  
 tyvla sonno  
 vamyspe era solita  
 vapoc volpe  
 velymte cacciatore  
 vlatosy bicchierini  
 vlemat castello  
 vlo su  
 vlyk oro

vocre subito  
 vomylo ci erano  
 vramela si accorsero  
 vrase cadde  
 vrele secondo  
 vryso aveva  
 vrysyl ucciderla  
 ycevok ti chiami  
 ycsso non  
 ycylo gelosa  
 ykycyl possedeva  
 ykyvy ancora  
 ympe mia  
 ymyve rivali  
 yram uno  
 yrrel panino  
 ysety riuscì  
 ysocy giorno  
 ysove albero  
 ytly vide  
 ytosav desideri  
 yvlo suo

# === POS DICTIONARY

===

A 2  
 B 8  
 C 9  
 D 7  
 E 3  
 P 0  
 R 4  
 S 6  
 V 1
