# Supplementary material
Source: ML conference proceedings conference paper supplement (https://aclanthology.org/2021.teachingnlp-1.7)
Supplement: OptionalSupplementaryMaterial [file 0210_letters_translated.pdf › materials/out/0210_letters_translated.pdf]

1. tyr<sup>3</sup> pry<sup>4</sup> ysocy<sup>6</sup> parcy<sup>2</sup> olme<sup>4</sup> polce<sup>6</sup> omaka<sup>1</sup> tyr<sup>3</sup> stykos<sup>6</sup> re<sup>3</sup> csy<sup>4</sup> atykyv<sup>6</sup>
2. asyk<sup>3</sup> tlocy<sup>7</sup> oprom<sup>6</sup> csy<sup>4</sup> polce<sup>6</sup> pryk<sup>1</sup> olme<sup>4</sup> kyrma<sup>6</sup> otmot<sup>2</sup> kryl<sup>3</sup> csy<sup>4</sup> plac<sup>6</sup>
3. tmo<sup>4</sup> cer<sup>6</sup> sa<sup>9</sup> csy<sup>4</sup> polce<sup>6</sup> sokarmo<sup>1</sup> csy<sup>4</sup> kyrma<sup>6</sup> cykalys<sup>6</sup>
4. asyk<sup>3</sup> csy<sup>4</sup> lokok<sup>6</sup> oso<sup>3</sup> csy<sup>4</sup> polce<sup>6</sup> olme<sup>4</sup> cseky<sup>2</sup> temym<sup>6</sup> okalo<sup>1</sup> tmo<sup>4</sup> cer<sup>6</sup>
5. csy<sup>4</sup> temym<sup>6</sup> ykycyl<sup>1</sup> yram<sup>4</sup> alcemo<sup>6</sup>
6. pry<sup>4</sup> ysocy<sup>6</sup> csy<sup>4</sup> temym<sup>6</sup> sytmy<sup>1</sup> re<sup>3</sup> set<sup>4</sup> alcemo<sup>6</sup>
7. tmos<sup>0</sup> ma<sup>1</sup> clote<sup>2</sup> stepa<sup>3</sup> ymyve<sup>6</sup> tyr<sup>3</sup> rmopo<sup>7</sup> vlemat<sup>6</sup>
8. set<sup>4</sup> alcemo<sup>6</sup> elepo<sup>1</sup> re<sup>3</sup> csy<sup>4</sup> polce<sup>6</sup>
9. emy<sup>0</sup> cety<sup>1</sup> clote<sup>2</sup> stepa<sup>3</sup> ymyve<sup>6</sup>

10. asyk<sup>3</sup> tlocy<sup>7</sup> oprom<sup>6</sup> csy<sup>4</sup> polce<sup>6</sup> sytmy<sup>1</sup> ykyvy<sup>8</sup> re<sup>3</sup> set<sup>4</sup> alcemo<sup>6</sup>

11. tmos<sup>0</sup> ma<sup>1</sup> clote<sup>2</sup> stepa<sup>3</sup> ymyve<sup>6</sup> tyr<sup>3</sup> rmopo<sup>7</sup> vlemat<sup>6</sup>

12. set<sup>4</sup> alcemo<sup>6</sup> cyrlo<sup>1</sup>

13. cykalys<sup>6</sup> ma<sup>1</sup> clote<sup>2</sup> stepa<sup>3</sup> ymyve<sup>6</sup> tyr<sup>3</sup> rmopo<sup>7</sup> vlemat<sup>6</sup>

14. csy<sup>4</sup> polce<sup>6</sup> ycylo<sup>2</sup> cepre<sup>1</sup> tmesy<sup>6</sup> re<sup>3</sup> pry<sup>4</sup> velymte<sup>6</sup> oso<sup>5</sup> rpotme<sup>1</sup> cykalys<sup>6</sup>

15. sot<sup>9</sup> csy<sup>4</sup> potmy<sup>6</sup> ysety<sup>1</sup> re<sup>5</sup> rmyvas<sup>1</sup> tyr<sup>3</sup> tmo<sup>4</sup> tmove<sup>6</sup>

16. oso<sup>3</sup> elyk<sup>6</sup> cykalys<sup>6</sup> ytly<sup>1</sup> olme<sup>4</sup> rokyl<sup>2</sup> elvy<sup>6</sup> sa<sup>9</sup> kokev<sup>1</sup> este<sup>5</sup> akatys<sup>1</sup>

17. akro<sup>7</sup> eply<sup>6</sup> tyr<sup>3</sup> csy<sup>4</sup> elvy<sup>6</sup> rapo<sup>1</sup> skorcy<sup>2</sup>

18. tmo<sup>4</sup> klavra<sup>6</sup> etmasep<sup>1</sup> mpa<sup>3</sup> olme<sup>4</sup> tmyrom<sup>6</sup> otmot<sup>2</sup>

19. tmotmoky<sup>1</sup> memy<sup>3</sup> asala<sup>7</sup> armyka<sup>6</sup>

20. akro<sup>7</sup> oplymy<sup>6</sup> vryso<sup>1</sup> tmo<sup>4</sup> yvlo<sup>2</sup> alylyvo<sup>6</sup>

21. vomylo<sup>1</sup> asala<sup>7</sup> rpolce<sup>6</sup> asala<sup>7</sup> etmyce<sup>6</sup> asala<sup>7</sup> vlatosy<sup>6</sup>

22. cykalys<sup>6</sup> orykyko<sup>1</sup> vlo<sup>3</sup> pry<sup>4</sup> sposo<sup>6</sup>

23. oso<sup>3</sup> elyk<sup>6</sup> cesevo<sup>1</sup> ec<sup>4</sup> otmos<sup>6</sup> oso<sup>3</sup> elvy<sup>6</sup>

24. mtace<sup>1</sup> stym<sup>6</sup> etoc<sup>5</sup> aplevap<sup>1</sup> at<sup>4</sup> vlyk<sup>6</sup> mpa<sup>3</sup> ec<sup>4</sup> alyma<sup>6</sup>

25. ec<sup>4</sup> stym<sup>6</sup> vramela<sup>1</sup> etoc<sup>5</sup> acylyc<sup>0</sup> lcyrate<sup>1</sup>

26. tmo<sup>4</sup> otese<sup>6</sup> cyrlo<sup>1</sup>

27. tmos<sup>0</sup> alope<sup>1</sup> pry<sup>4</sup> cympa<sup>6</sup> re<sup>3</sup> tmo<sup>4</sup> maky<sup>7</sup> yrrel<sup>6</sup>

28. tmo<sup>4</sup> vrele<sup>6</sup> cyrlo<sup>1</sup> re<sup>3</sup> pry<sup>4</sup> temte<sup>2</sup> palo<sup>6</sup>

29. tmos<sup>0</sup> tlokoc<sup>1</sup> csy<sup>4</sup> ympe<sup>2</sup> oprepol<sup>6</sup>

30. oso<sup>3</sup> amtyr<sup>6</sup> cykalys<sup>6</sup> tekasat<sup>1</sup>

31. ec<sup>4</sup> stym<sup>6</sup> kovoky<sup>1</sup> re<sup>3</sup> cykalys<sup>6</sup> memy<sup>3</sup> sataspa<sup>6</sup>

32. kryl<sup>8</sup> ycevok<sup>1</sup>

33. rvamty<sup>1</sup> cykalys<sup>6</sup>

34. cykalys<sup>6</sup> elepo<sup>1</sup> re<sup>3</sup> ec<sup>4</sup> stym<sup>6</sup>

35. kryl<sup>8</sup> lvavaro<sup>1</sup> tyr<sup>3</sup> csy<sup>4</sup> tlacy<sup>7</sup> atyme<sup>6</sup>

36. ec<sup>4</sup> stym<sup>6</sup> kovoky<sup>1</sup> memy<sup>3</sup> provyt<sup>6</sup>

37. cykalys<sup>6</sup> ocely<sup>1</sup> re<sup>5</sup> tmemoce<sup>1</sup> csy<sup>4</sup> aspe<sup>2</sup> myrok<sup>6</sup>

38. csy<sup>4</sup> polce<sup>6</sup> cepre<sup>1</sup> tmesy<sup>6</sup> oso<sup>3</sup> vrysyl<sup>1</sup> sot<sup>9</sup> oco<sup>0</sup> cetoklo<sup>1</sup>

39. pry<sup>4</sup> palo<sup>6</sup> sytmy<sup>1</sup> re<sup>3</sup> cykalys<sup>6</sup> oso<sup>5</sup> lovevy<sup>1</sup> memy<sup>3</sup> rmyc<sup>0</sup> tyr<sup>3</sup> csy<sup>4</sup> atyme<sup>6</sup>

40. cykalys<sup>6</sup> styly<sup>1</sup> cropa<sup>2</sup> sa<sup>9</sup> cepre<sup>1</sup> pry<sup>4</sup> evryv<sup>6</sup> re<sup>3</sup> akro<sup>7</sup> palo<sup>6</sup>

41. oso<sup>3</sup> ysocy<sup>6</sup> ec<sup>4</sup> stym<sup>6</sup> ryvysy<sup>1</sup> vlo<sup>3</sup> ec<sup>4</sup> alyma<sup>6</sup> re<sup>5</sup> motym<sup>1</sup> at<sup>4</sup> vlyk<sup>6</sup>

42. cykalys<sup>6</sup> vamyspe<sup>1</sup> lovevy<sup>1</sup> rmy<sup>2</sup> tyr<sup>3</sup> csy<sup>4</sup> atyme<sup>6</sup>

43. oco<sup>0</sup> omaka<sup>1</sup> sa<sup>9</sup> crova<sup>1</sup> asmet<sup>8</sup> rapo<sup>1</sup> tyr<sup>3</sup> csy<sup>4</sup> atyme<sup>6</sup>

44. tavro<sup>8</sup> tyr<sup>3</sup> tmo<sup>4</sup> vlemat<sup>6</sup> csy<sup>4</sup> polce<sup>6</sup> pepero<sup>1</sup> re<sup>3</sup> set<sup>4</sup> alcemo<sup>6</sup>

45. tmos<sup>0</sup> ma<sup>1</sup> clote<sup>2</sup> stepa<sup>3</sup> ymyve<sup>6</sup> tyr<sup>3</sup> rmopo<sup>7</sup> vlemat<sup>6</sup>

46. tmym<sup>7</sup> ysocy<sup>6</sup> csy<sup>4</sup> mpokem<sup>6</sup> oso<sup>3</sup> set<sup>4</sup> alcemo<sup>6</sup> tyl<sup>1</sup>

47. tyr<sup>3</sup> tmo<sup>4</sup> vlemat<sup>6</sup> emy<sup>0</sup> ycso<sup>8</sup> esko<sup>1</sup> ymyve<sup>6</sup>

48. sot<sup>9</sup> cykalys<sup>6</sup> ma<sup>1</sup> clote<sup>2</sup> stepa<sup>3</sup> ymyve<sup>6</sup> tyr<sup>3</sup> csy<sup>4</sup> atyme<sup>6</sup>

49. csy<sup>4</sup> polce<sup>6</sup> oplo<sup>1</sup> at<sup>4</sup> ecyvy<sup>6</sup> oso<sup>3</sup> tmo<sup>4</sup> velymte<sup>6</sup> sa<sup>9</sup> cyrlo<sup>1</sup>

50. etlol<sup>8</sup> lvosyc<sup>1</sup> cykalys<sup>6</sup> syk<sup>0</sup> olpok<sup>2</sup>

51. csy<sup>4</sup> polce<sup>6</sup> pryre<sup>1</sup> olme<sup>4</sup> ostom<sup>6</sup> celosos<sup>2</sup> sa<sup>9</sup> pevaret<sup>1</sup> mpa<sup>3</sup> rvyse<sup>2</sup> ocyso<sup>6</sup>

52. orce<sup>1</sup> re<sup>3</sup> csy<sup>4</sup> atyme<sup>6</sup> oso<sup>3</sup> ec<sup>4</sup> asala<sup>2</sup> stym<sup>6</sup>

53. cykalys<sup>6</sup> ycso<sup>8</sup> tmym<sup>1</sup> csy<sup>4</sup> polce<sup>6</sup>

54. ampo<sup>1</sup> csy<sup>4</sup> cymta<sup>6</sup> re<sup>3</sup> csy<sup>4</sup> rvyse<sup>6</sup>

55. csy<sup>4</sup> polce<sup>6</sup> avlokot<sup>2</sup> sytmy<sup>1</sup> re<sup>3</sup> cykalys<sup>6</sup>

56. ytosav<sup>1</sup> olme<sup>4</sup> race<sup>6</sup>

57. cykalys<sup>6</sup> ycso<sup>8</sup> krepa<sup>1</sup> etoc<sup>5</sup> csy<sup>4</sup> race<sup>6</sup> rapo<sup>1</sup> celosos<sup>2</sup>

58. csy<sup>4</sup> potmy<sup>6</sup> cepre<sup>1</sup> pry<sup>4</sup> cympa<sup>6</sup> re<sup>3</sup> csy<sup>4</sup> race<sup>6</sup> celosos<sup>2</sup> sa<sup>9</sup> vrase<sup>1</sup> vocre<sup>8</sup> tyr<sup>3</sup> pry<sup>4</sup> tyvla<sup>6</sup> evlerar<sup>2</sup>

59. csy<sup>4</sup> elyk<sup>6</sup> ec<sup>4</sup> stym<sup>6</sup> cesevo<sup>1</sup> re<sup>3</sup> elvy<sup>6</sup> sa<sup>9</sup> oplosa<sup>1</sup> csy<sup>4</sup> potmy<sup>6</sup> tepro<sup>2</sup>

60. pry<sup>4</sup> palo<sup>6</sup> tmympo<sup>1</sup> csy<sup>4</sup> esace<sup>6</sup> oso<sup>3</sup> csy<sup>4</sup> polce<sup>6</sup>

61. tmo<sup>4</sup> palo<sup>6</sup> pryre<sup>1</sup> pry<sup>4</sup> sposo<sup>6</sup> re<sup>3</sup> cykalys<sup>6</sup>

62. pry<sup>4</sup> ysocy<sup>6</sup> esmep<sup>1</sup> pry<sup>4</sup> prolep<sup>6</sup>

63. tmo<sup>4</sup> prolep<sup>6</sup> cepre<sup>1</sup> pry<sup>4</sup> evryv<sup>6</sup> re<sup>3</sup> cykalys<sup>6</sup> sa<sup>9</sup> okely<sup>1</sup> csy<sup>4</sup> esace<sup>6</sup>

64. csy<sup>4</sup> potmy<sup>6</sup> tekasat<sup>1</sup> cropa<sup>2</sup>
