# Supplementary material
Source: ML conference proceedings conference paper supplement (https://aclanthology.org/2021.teachingnlp-1.7)
Supplement: OptionalSupplementaryMaterial [file 0210_plaintext.pdf › materials/out/0210_plaintext.pdf]

1. in<sup>E</sup> un<sup>R</sup> giorno<sup>S</sup> nevoso<sup>A</sup> una<sup>R</sup> regina<sup>S</sup> cuciva<sup>V</sup> in<sup>E</sup> silenzio<sup>S</sup> a<sup>E</sup> la<sup>R</sup> finestra<sup>S</sup>

2. dopo<sup>E</sup> qualche<sup>D</sup> tempo<sup>S</sup> la<sup>R</sup> regina<sup>S</sup> ebbe<sup>V</sup> una<sup>R</sup> bambina<sup>S</sup> candida<sup>A</sup> come<sup>E</sup> la<sup>R</sup> neve<sup>S</sup>

3. il<sup>R</sup> re<sup>S</sup> e<sup>C</sup> la<sup>R</sup> regina<sup>S</sup> chiamarono<sup>V</sup> la<sup>R</sup> bambina<sup>S</sup> biancaneve<sup>S</sup>

4. dopo<sup>E</sup> la<sup>R</sup> morte<sup>S</sup> di<sup>E</sup> la<sup>R</sup> regina<sup>S</sup> una<sup>R</sup> altra<sup>A</sup> donna<sup>S</sup> sposò<sup>V</sup> il<sup>R</sup> re<sup>S</sup>

5. la<sup>R</sup> donna<sup>S</sup> possedeva<sup>V</sup> uno<sup>R</sup> specchio<sup>S</sup>

6. un<sup>R</sup> giorno<sup>S</sup> la<sup>R</sup> donna<sup>S</sup> chiese<sup>V</sup> a<sup>E</sup> lo<sup>R</sup> specchio<sup>S</sup>

7. chi<sup>P</sup> è<sup>V</sup> bella<sup>A</sup> senza<sup>E</sup> rivali<sup>S</sup> in<sup>E</sup> questo<sup>D</sup> castello<sup>S</sup>

8. lo<sup>R</sup> specchio<sup>S</sup> rispose<sup>V</sup> a<sup>E</sup> la<sup>R</sup> regina<sup>S</sup>

9. tu<sup>P</sup> sei<sup>V</sup> bella<sup>A</sup> senza<sup>E</sup> rivali<sup>S</sup>

10. dopo<sup>E</sup> qualche<sup>D</sup> tempo<sup>S</sup> la<sup>R</sup> regina<sup>S</sup> chiese<sup>V</sup> ancora<sup>B</sup> a<sup>E</sup> lo<sup>R</sup> specchio<sup>S</sup>

11. chi<sup>P</sup> è<sup>V</sup> bella<sup>A</sup> senza<sup>E</sup> rivali<sup>S</sup> in<sup>E</sup> questo<sup>D</sup> castello<sup>S</sup>

12. lo<sup>R</sup> specchio<sup>S</sup> disse<sup>V</sup>

13. biancaneve<sup>S</sup> è<sup>V</sup> bella<sup>A</sup> senza<sup>E</sup> rivali<sup>S</sup> in<sup>E</sup> questo<sup>D</sup> castello<sup>S</sup>

14. la<sup>R</sup> regina<sup>S</sup> gelosa<sup>A</sup> diede<sup>V</sup> ordine<sup>S</sup> a<sup>E</sup> un<sup>R</sup> cacciatore<sup>S</sup> di<sup>Z</sup> uccidere<sup>V</sup> biancaneve<sup>S</sup>

15. ma<sup>C</sup> la<sup>R</sup> ragazza<sup>S</sup> riuscì<sup>V</sup> a<sup>Z</sup> scappare<sup>V</sup> in<sup>E</sup> il<sup>R</sup> bosco<sup>S</sup>

16. di<sup>E</sup> sera<sup>S</sup> biancaneve<sup>S</sup> vide<sup>V</sup> una<sup>R</sup> piccola<sup>A</sup> casa<sup>S</sup> e<sup>C</sup> entrò<sup>V</sup> per<sup>Z</sup> riposare<sup>V</sup>

17. ogni<sup>D</sup> cosa<sup>S</sup> in<sup>E</sup> la<sup>R</sup> casa<sup>S</sup> era<sup>V</sup> minuscola<sup>A</sup>

18. il<sup>R</sup> tavolino<sup>S</sup> era coperto<sup>V</sup> da<sup>E</sup> una<sup>R</sup> tovaglia<sup>S</sup> candida<sup>A</sup>

19. era apparecchiato<sup>V</sup> con<sup>E</sup> sette<sup>D</sup> piattini<sup>S</sup>

20. ogni<sup>D</sup> piattino<sup>S</sup> aveva<sup>V</sup> il<sup>R</sup> suo<sup>A</sup> cucchiaino<sup>S</sup>

21. ci erano<sup>V</sup> sette<sup>D</sup> coltelli<sup>S</sup> sette<sup>D</sup> forchette<sup>S</sup> sette<sup>D</sup> bicchierini<sup>S</sup>

22. biancaneve<sup>S</sup> si addormentò<sup>V</sup> su<sup>E</sup> un<sup>R</sup> lettino<sup>S</sup>

23. di<sup>E</sup> sera<sup>S</sup> tornarono<sup>V</sup> i<sup>R</sup> padroni<sup>S</sup> di<sup>E</sup> casa<sup>S</sup>

24. erano<sup>V</sup> nani<sup>S</sup> che<sup>Z</sup> estraevano<sup>V</sup> l<sup>R</sup> oro<sup>S</sup> da<sup>E</sup> i<sup>R</sup> monti<sup>S</sup>

25. i<sup>R</sup> nani<sup>S</sup> si accorsero<sup>V</sup> che<sup>Z</sup> qualcuno<sup>P</sup> era entrato<sup>V</sup>

26. il<sup>R</sup> primo<sup>S</sup> disse<sup>V</sup>

27. chi<sup>P</sup> ha dato<sup>V</sup> un<sup>R</sup> morso<sup>S</sup> a<sup>E</sup> il<sup>R</sup> mio<sup>D</sup> panino<sup>S</sup>

28. il<sup>R</sup> secondo<sup>S</sup> disse<sup>V</sup> a<sup>E</sup> un<sup>R</sup> altro<sup>A</sup> nano<sup>S</sup>

29. chi<sup>P</sup> ha usato<sup>V</sup> la<sup>R</sup> mia<sup>A</sup> forchettina<sup>S</sup>

30. di<sup>E</sup> mattina<sup>S</sup> biancaneve<sup>S</sup> si svegliò<sup>V</sup>

31. i<sup>R</sup> nani<sup>S</sup> chiesero<sup>V</sup> a<sup>E</sup> biancaneve<sup>S</sup> con<sup>E</sup> gentilezza<sup>S</sup>

32. come<sup>B</sup> ti chiami<sup>V</sup>

33. mi chiamo<sup>V</sup> biancaneve<sup>S</sup>

34. biancaneve<sup>S</sup> rispose<sup>V</sup> a<sup>E</sup> i<sup>R</sup> nani<sup>S</sup>

35. come<sup>B</sup> sei arrivata<sup>V</sup> in<sup>E</sup> la<sup>R</sup> nostra<sup>D</sup> casina<sup>S</sup>

36. i<sup>R</sup> nani<sup>S</sup> chiesero<sup>V</sup> con<sup>E</sup> curiosità<sup>S</sup>

37. biancaneve<sup>S</sup> iniziò<sup>V</sup> a<sup>Z</sup> raccontare<sup>V</sup> la<sup>R</sup> sua<sup>A</sup> storia<sup>S</sup>

38. la<sup>R</sup> regina<sup>S</sup> diede<sup>V</sup> ordine<sup>S</sup> di<sup>E</sup> ucciderla<sup>V</sup> ma<sup>C</sup> lei<sup>P</sup> era scappata<sup>V</sup>

39. un<sup>R</sup> nano<sup>S</sup> chiese<sup>V</sup> a<sup>E</sup> biancaneve<sup>S</sup> di<sup>Z</sup> rimanere<sup>V</sup> con<sup>E</sup> loro<sup>P</sup> in<sup>E</sup> la<sup>R</sup> casina<sup>S</sup>

40. biancaneve<sup>S</sup> accettò<sup>V</sup> felice<sup>A</sup> e<sup>C</sup> diede<sup>V</sup> un<sup>R</sup> bacio<sup>S</sup> a<sup>E</sup> ogni<sup>D</sup> nano<sup>S</sup>

41. di<sup>E</sup> giorno<sup>S</sup> i<sup>R</sup> nani<sup>S</sup> andavano<sup>V</sup> su<sup>E</sup> i<sup>R</sup> monti<sup>S</sup> a<sup>Z</sup> cercare<sup>V</sup> l<sup>R</sup> oro<sup>S</sup>

42. biancaneve<sup>S</sup> era solita<sup>V</sup> rimanere<sup>V</sup> sola<sup>A</sup> in<sup>E</sup> la<sup>R</sup> casina<sup>S</sup>

43. lei<sup>P</sup> cuciva<sup>V</sup> e<sup>C</sup> leggeva<sup>V</sup> quando<sup>B</sup> era<sup>V</sup> in<sup>E</sup> la<sup>R</sup> casina<sup>S</sup>

44. intanto<sup>B</sup> in<sup>E</sup> il<sup>R</sup> castello<sup>S</sup> la<sup>R</sup> regina<sup>S</sup> chiedeva<sup>V</sup> a<sup>E</sup> lo<sup>R</sup> specchio<sup>S</sup>

45. chi<sup>P</sup> è<sup>V</sup> bella<sup>A</sup> senza<sup>E</sup> rivali<sup>S</sup> in<sup>E</sup> questo<sup>D</sup> castello<sup>S</sup>

46. quel<sup>D</sup> giorno<sup>S</sup> la<sup>R</sup> risposta<sup>S</sup> di<sup>E</sup> lo<sup>R</sup> specchio<sup>S</sup> fu<sup>V</sup>

47. in<sup>E</sup> il<sup>R</sup> castello<sup>S</sup> tu<sup>P</sup> non<sup>B</sup> hai<sup>V</sup> rivali<sup>S</sup>

48. ma<sup>C</sup> biancaneve<sup>S</sup> è<sup>V</sup> bella<sup>A</sup> senza<sup>E</sup> rivali<sup>S</sup> in<sup>E</sup> la<sup>R</sup> casina<sup>S</sup>

49. la<sup>R</sup> regina<sup>S</sup> capì<sup>V</sup> l<sup>R</sup> inganno<sup>S</sup> di<sup>E</sup> il<sup>R</sup> cacciatore<sup>S</sup> e<sup>C</sup> disse<sup>V</sup>

50. allora<sup>B</sup> ucciderò<sup>V</sup> biancaneve<sup>S</sup> io<sup>P</sup> stessa<sup>A</sup>

51. la<sup>R</sup> regina<sup>S</sup> preparò<sup>V</sup> una<sup>R</sup> pozione<sup>S</sup> avvelenata<sup>A</sup> e<sup>C</sup> si travestì<sup>V</sup> da<sup>E</sup> vecchia<sup>A</sup> strega<sup>S</sup>

52. andò<sup>V</sup> a<sup>E</sup> la<sup>R</sup> casina<sup>S</sup> di<sup>E</sup> i<sup>R</sup> sette<sup>A</sup> nani<sup>S</sup>

53. biancaneve<sup>S</sup> non<sup>B</sup> riconobbe<sup>V</sup> la<sup>R</sup> regina<sup>S</sup>

54. aprì<sup>V</sup> la<sup>R</sup> porta<sup>S</sup> a<sup>E</sup> la<sup>R</sup> vecchia<sup>S</sup>

55. la<sup>R</sup> regina<sup>S</sup> travestita<sup>A</sup> chiese<sup>V</sup> a<sup>E</sup> biancaneve<sup>S</sup>

56. desideri<sup>V</sup> una<sup>R</sup> mela<sup>S</sup>

57. biancaneve<sup>S</sup> non<sup>B</sup> sapeva<sup>V</sup> che<sup>Z</sup> la<sup>R</sup> mela<sup>S</sup> era<sup>V</sup> avvelenata<sup>A</sup>

58. la<sup>R</sup> ragazza<sup>S</sup> diede<sup>V</sup> un<sup>R</sup> morso<sup>S</sup> a<sup>E</sup> la<sup>R</sup> mela<sup>S</sup> avvelenata<sup>A</sup> e<sup>C</sup> cadde<sup>V</sup> subito<sup>B</sup> in<sup>E</sup> un<sup>R</sup> sonno<sup>S</sup> profondis

59. la<sup>R</sup> sera<sup>S</sup> i<sup>R</sup> nani<sup>S</sup> tornarono<sup>V</sup> a<sup>E</sup> casa<sup>S</sup> e<sup>C</sup> trovarono<sup>V</sup> la<sup>R</sup> ragazza<sup>S</sup> svenuta<sup>A</sup>

60. un<sup>R</sup> nano<sup>S</sup> riconobbe<sup>V</sup> la<sup>R</sup> magia<sup>S</sup> di<sup>E</sup> la<sup>R</sup> regina<sup>S</sup>

61. il<sup>R</sup> nano<sup>S</sup> preparò<sup>V</sup> un<sup>R</sup> lettino<sup>S</sup> a<sup>E</sup> biancaneve<sup>S</sup>

62. un<sup>R</sup> giorno<sup>S</sup> arrivò<sup>V</sup> un<sup>R</sup> principe<sup>S</sup>

63. il<sup>R</sup> principe<sup>S</sup> diede<sup>V</sup> un<sup>R</sup> bacio<sup>S</sup> a<sup>E</sup> biancaneve<sup>S</sup> e<sup>C</sup> spezzò<sup>V</sup> la<sup>R</sup> magia<sup>S</sup>

64. la<sup>R</sup> ragazza<sup>S</sup> si svegliò<sup>V</sup> felice<sup>A</sup>
