# Supplementary material
Source: ML conference proceedings conference paper supplement (https://aclanthology.org/2021.teachingnlp-1.7)
Supplement: OptionalSupplementaryMaterial [file Biancaneve_en_dings_cards_activity_2.odd.pdf › materials/tmp/Biancaneve_en_dings_cards_activity_2.odd.pdf]

*il*

R

*il*

R

*il*

R

*lo*

R

*lo*

R

*la*

R

*la*

R

*la*

R

*z*

R

*z*

R

*i*

R

*i*

R

*i*

R

*un*

R

*un*

R

*uno*

R

*uno*

R

*uno*

R

*una*

R

*una*

R

*quel*

D

*questo*

D

*ogni*

D

*e*

*c*

*e*

*c*

*e*

*c*

*ma*

C

*in*

E

*in*

E

*a*

E

*di*

E

*di*

E

*con*

E

*lei*

P

*lei*

P

*l u i*

P

*chi*

P

*chi*

P

*non*

B

*inganno*

S

*donna*

S

*biancaneve*

S

*specchio*

S

*principe*

S

*giorno*

S

*morso*

S

*gentilezza*

S

*bacio*

S

*ragazza*

S

*albero*

S

*bambino*

S

*chiesero*

V

*era*

*V*

*si sveglia*

V

*spezzò*

*V*

*correva*

V

*candida*

A

*felice*

A

*di*

Z

*per*

Z
