# Supplementary material
Source: ML conference proceedings conference paper supplement (https://aclanthology.org/2021.teachingnlp-1.7)
Supplement: OptionalSupplementaryMaterial [file Biancaneve_en_dings_dict.pdf › materials/out/Biancaneve_en_dings_dict.pdf]

# === WORD DICTIONARY

===

\* 1  
 \*♦+♠ finestra  
 \*♦→† morning  
 \*☞ lo  
 \*✓☾ rest  
 \*✕\* fell  
 \*★♣\* noticed  
 \*★☆ queen  
 \*♣♣ diede  
 ●■♣ they  
 ●▲✓ quel  
 ●▲† spoon  
 ●♠▼ woods  
 ●♣✂ asked  
 ■●☞ dwarf  
 ■●✓ non  
 ■▼♣ its  
 ■♠☞✈ asleep  
 ■☞♣ chi  
 ■†★ seven  
 ■★☞ each  
 ■\*♥● chiese  
 ▲■♦ fork  
 ▲☾♥★ answered  
 ▲♠♥ the  
 ▲☞✓♦ married  
 ▲✓★♥ huntsman  
 ▲\* il  
 ▼❄✈ per  
 ▼■☞ used  
 ▼♥♥☞ ragazza

▼☞ to  
 ▼☞✧☞ opened  
 ▼✕●☞\* had entered  
 ▼+●♣ triste  
 ♦❄☞☆ was sewing  
 ♦❄♣ woman  
 ♦●♣✈ meanwhile  
 ♦■✈ from  
 ♦■†♣ kindness  
 ♦■\* snowy  
 ♦♣❄☆ castle  
 ♦♣✕❄ si svegliò  
 ♦✈●☞ another  
 ♦☞ un  
 ♦☞♣✧ daughter  
 ♦✓♠ came  
 ☾ a  
 ☾▲▼ table  
 ☾➤☞✂ rispose  
 ☾☞†☞ poisoned  
 ☾✓+ into  
 ☾+▲ with  
 ☾†♦♣ offered  
 ☾♣♦ house  
 ☾\*♦★ correva  
 ☾\*✕ that  
 ♣▲☞ night  
 ♣☞→ tiny  
 ♣✓†☾♠ didn't  
 recognise  
 ♣✧■➤ felice  
 ♥→❄ forks  
 ♥☞▲ bosco

♥☞♣ una  
 ♥+■ were  
 ♥♣♦❄ realised  
 ♥★➤✂ questo  
 ♣▼♥ took  
 ♣♠▼ con  
 ♣♦♠ deep  
 ♣♦➔★ mountains  
 ♣♠✂✂† ordinò  
 ♣➤● day  
 ♣➤♠ sera  
 ♣☞+ but  
 ♣✧★ trick  
 ♦▼†✧ agreed  
 ♦♠† witch  
 ♦♣♦ door  
 ♦♠♦✕ myself  
 ♦♠✈♣♠ did you get  
 ♦⌚♠ plates  
 ♦✓▼ had  
 ♥♦✂☞ window  
 ♥♦✓➤ chiesero  
 ♥✂➤ ogni  
 ♥†✕♥♠ didn't know  
 ♥\*✧ when  
 ♠●♥♥ inganno  
 ♠▼♣✧ because of  
 ♠♣✈ uno  
 ♠⌚☞ era  
 ♠★☞♦ masters  
 ♠\* in  
 ➔❄⌚ plate  
 ➔▼♥♠ foresta

➔✂✕▼ wanted  
 ➔☞☆ lei  
 ➔⌚ as  
 ➔+✧● came back  
 ➔★ it  
 ➤♣☞ your  
 ➤♠†♦ would go  
 ➤➔✈❄ unlike  
 ➤✈● white  
 ➤☞● sleep  
 ➤☞♣ how  
 ➤⌚ by  
 ➤†✈ volpe  
 ✂▼● after  
 ✂♠♣ cloth  
 ✂✈♦ old  
 ✂✕☞ her  
 ✂†♣ child  
 ☞▲♠ stay  
 ☞➔❄✂ candida  
 ☞➔★ bacio  
 ☞➔♣ are  
 ☞†♥\* beautiful  
 ☞☆♣ gold  
 ☞★♥♠ replied  
 ⌚♠❄▼ giorno  
 ⌚♣☞♥♠ would  
 answer  
 ⌚♦♦ one  
 ⌚♥✈ dug  
 ⌚✂●☆ riconobbe  
 ⌚✓♦ death  
 ⌚✕✓➤ would say

✈️➡️♠️ escaped  
 ✈️♦️★ and  
 ✈️🕒♣️➡️ ha dato  
 ✈️✔️🌸\* there were  
 ✈️†⬠ named  
 🖐️❄️+🍔 sandwich  
 🖐️●❄️ lui  
 🖐️■♥️ you  
 🖐️🍔✧♠️ will kill  
 🖐️✂️▼ who  
 🖐️🕒♣️ bit  
 🖐️📝♥️➡️ during  
 📝❄️✔️ other  
 📝†+ then  
 ✔️♥️🌸 was  
 ✔️♥️♦️📝 spezzò  
 ✔️†🗨️ any  
 ✔️★✂️ some  
 ✕ i  
 ✕▼♥️■🖐️ immediately  
 ✕▼📝 bite  
 ✕♥️🖐️▲ bambina  
 ✕✂️🖐️📝 woke up  
 ✕✔️❄️ morso  
 ✕\*🕒■ casina  
 +▲♣️ our  
 +▲✧🖐️ comprò  
 +🍔●🖐️ mirror  
 +🍔🕒■ evening  
 +🍔⬠📝 someone  
 +♥️▼ nani  
 +➡️▼ them  
 +🖐️♠️ mela

+✔️♣️ what  
 +♣️■🖐️ regina  
 +\* of  
 †❄️\* she  
 †🕒♦️✕ entered  
 †🕒📝● specchio  
 †♦️▲ kill  
 †♥️ ma  
 †➡️ re  
 †🕒♠️🗨️ gentilezza  
 †✈️♥️ disse  
 †✕♠️ che  
 †🌸\* owned  
 ⬠🖐️✧● albero  
 ⬠📝♠️\* was laid  
 ⬠+▼ time  
 ⬠† is  
 ⬠✧🖐️🗨️ everything  
 ⬠🌸♦️ dig  
 ♣️ e  
 ♣️❄️♦️ girl  
 ♣️■ my  
 ♣️▲🕒 king  
 ♣️▼♥️➡️ happily  
 ♣️♥️🖐️ this  
 ♣️♦️♦️🖐️ snowwhite  
 ♣️+■♠️ disguised  
 ♣️+♥️ feel  
 ♣️\*†✈️ avvelenata  
 ✧▲ di  
 ✧♦️✈️ bed  
 ✧📝● apple  
 ✧✕🍔 for

✧♣♦♣ would stay  
 ★●➔ name  
 ★♥☹▼ knives  
 ★➔☹♠ dwarfs  
 ★➤♣\* jealous  
 ★✓☹❄ glasses  
 ★\*☞ went  
 \*▲ an  
 \*▼ la  
 \*♫✈ said  
 \*♦ on  
 \*✈▲● principe  
 \*☞♣✎ little  
 \*✎▼ alone  
 \*✓✂ donna  
 \*★✧✂ bambino  
 ♣●♫ snow  
 ♣✈†❄ biancaneve  
 ♣✈✧❄☾ was covered  
 ♣✎♦➔ looked  
 ♣♣✧✎ ordine  
 === POS DICTIONARY

===

A 2  
 B 8  
 C 9  
 D 7  
 E 3  
 P 0  
 R 4  
 S 6  
 V 1  
 Z 5
