# Supplementary material
Source: ML conference proceedings conference paper supplement (https://aclanthology.org/2021.teachingnlp-1.7)
Supplement: OptionalSupplementaryMaterial [file Biancaneve_en_letters_dict.pdf › materials/out/Biancaneve_en_letters_dict.pdf]

=== WORD DICTIONARY  
===

acer are  
acso took  
aklos jealous  
alap fork  
alotele there were  
alykevo had entered  
amemym sandwich  
ampev trick  
apas bite  
apre this  
arace mirror  
arcy her  
arys rest  
asaty married  
askasa answered  
atas when  
atlo king  
atmec little  
atmek castle  
avam bit  
avapo other  
avlek forks  
avly went  
avrol opened  
cecy but  
cekap snowy  
celos woods  
cemyso beautiful  
clo on  
croto morning  
cso of

cyket after  
cylyc alone  
cyvykre because of  
ecrev queen  
ekre fell  
elamem realised  
elme snow  
elpac during  
em a  
emta feel  
emteta will kill  
emytery everything  
epasy knives  
epret asked  
ertar seven  
etlev asleep  
evlom another  
kasvo offered  
kelva plate  
kempa glasses  
klak from  
kles each  
klet used  
klycsa disguised  
klyra dwarf  
kocry dwarfs  
kopa came  
kovo time  
kratyk would say  
krysva mountains  
kymyk woke up  
lamykle was sewing  
lceras daughter

lcyrat meanwhile  
lcyvyce immediately  
lelcy night  
lemom death  
lket stay  
lmepo table  
lmyk its  
lovev sleep  
lyko deep  
lyly your  
memy had  
mota said  
mtaply would go  
mtecyc kindness  
mtevy noticed  
mtoce escaped  
ola an  
olcecet did you get  
olymy myself  
omak was  
oplak window  
oplo name  
opro and  
opryk cloth  
orel the  
orrok child  
orvy one  
oter girl  
otes them  
otlok plates  
otmokyry didn't  
recognise  
ovale masters

ovo to  
pakry someone  
pete she  
pov my  
prom with  
rat by  
rcere entered  
rekep house  
rpotme came back  
rta it  
rycse owned  
ryr as  
sala old  
sece day  
selacra didn't know  
smakac was laid  
smela agreed  
smyra evening  
smysmy huntsman  
sorto wanted  
sosyv white  
sote some  
syva that  
tlac door  
tmemote would stay  
tmesy unlike  
tmo in  
tmot into  
tmy is  
tmym kill  
vatle replied  
vesy tiny  
vlapo apple

|                      |     |
|----------------------|-----|
| vrak for             | R 4 |
| vrel then            | S 6 |
| vreve looked         | V 1 |
| vryteka would answer | Z 5 |
| vylcy spoon          |     |
| ycev our             |     |
| ycla who             |     |
| ycsele poisoned      |     |
| ycsy bed             |     |
| ycsy witch           |     |
| ykotory was covered  |     |
| ykra dig             |     |
| ylcel woman          |     |
| ylol how             |     |
| ylve gold            |     |
| ym i                 |     |
| ymyv they            |     |
| yrmат named          |     |
| yrote happily        |     |
| yrpa what            |     |
| yset were            |     |
| ysov any             |     |
| ysto you             |     |
| ytlo dug             |     |
| ytocec snowwhite     |     |

=== POS DICTIONARY

===

|   |   |
|---|---|
| A | 2 |
| B | 8 |
| C | 9 |
| D | 7 |
| E | 3 |
| P | 0 |
