# Supplementary material
Source: ML conference proceedings conference paper supplement (https://aclanthology.org/2021.teachingnlp-1.7)
Supplement: OptionalSupplementaryMaterial [file Biancaneve_en_plaintext.pdf › materials/out/Biancaneve_en_plaintext.pdf]

1. in<sup>E</sup> a<sup>R</sup> snowy<sup>A</sup> day<sup>S</sup> a<sup>R</sup> queen<sup>S</sup> was sewing<sup>V</sup> by<sup>E</sup> her<sup>R</sup> window<sup>S</sup>

2. after<sup>E</sup> some<sup>D</sup> time<sup>S</sup> the<sup>R</sup> queen<sup>S</sup> had<sup>V</sup> a<sup>R</sup> daughter<sup>S</sup> as<sup>E</sup> white<sup>A</sup> as<sup>E</sup> snow<sup>S</sup>

3. because of<sup>E</sup> this<sup>P</sup> they<sup>P</sup> named<sup>V</sup> the<sup>R</sup> child<sup>S</sup> snowwhite<sup>S</sup>

4. after<sup>E</sup> the<sup>R</sup> death<sup>S</sup> of<sup>E</sup> the<sup>R</sup> queen<sup>S</sup> the<sup>R</sup> king<sup>S</sup> married<sup>V</sup> a<sup>R</sup> beautiful<sup>A</sup> woman<sup>S</sup>

5. the<sup>R</sup> woman<sup>S</sup> owned<sup>V</sup> a<sup>R</sup> mirror<sup>S</sup>

6. when<sup>C</sup> she<sup>P</sup> looked<sup>V</sup> in<sup>E</sup> the<sup>R</sup> mirror<sup>S</sup>

7. she<sup>P</sup> would say<sup>V</sup>

8. who<sup>P</sup> is<sup>V</sup> beautiful<sup>A</sup> unlike<sup>E</sup> any<sup>D</sup> other<sup>P</sup> in<sup>E</sup> this<sup>D</sup> castle<sup>S</sup>

9. the<sup>R</sup> mirror<sup>S</sup> would answer<sup>V</sup> to<sup>E</sup> the<sup>R</sup> queen<sup>S</sup>

10. you<sup>P</sup> are<sup>V</sup> beautiful<sup>A</sup> unlike<sup>E</sup> any<sup>D</sup> other<sup>P</sup> my<sup>D</sup> queen<sup>S</sup>

11. after<sup>E</sup> some<sup>D</sup> time<sup>S</sup> the<sup>R</sup> queen<sup>S</sup> asked<sup>V</sup> the<sup>R</sup> mirror<sup>S</sup>

12. who<sup>P</sup> is<sup>V</sup> beautiful<sup>A</sup> unlike<sup>E</sup> any<sup>D</sup> other<sup>P</sup> in<sup>E</sup> this<sup>D</sup> castle<sup>S</sup>

13. the<sup>R</sup> mirror<sup>S</sup> answered<sup>V</sup> to<sup>E</sup> the<sup>R</sup> queen<sup>S</sup>

14. snowwhite<sup>S</sup> is<sup>V</sup> beautiful<sup>A</sup> unlike<sup>E</sup> any<sup>D</sup> other<sup>P</sup> my<sup>D</sup> queen<sup>S</sup>

15. the<sup>R</sup> jealous<sup>A</sup> queen<sup>S</sup> asked<sup>V</sup> a<sup>R</sup> huntsman<sup>S</sup> to<sup>Z</sup> kill<sup>V</sup> snowwhite<sup>S</sup>

16. but<sup>C</sup> the<sup>R</sup> girl<sup>S</sup> escaped<sup>V</sup> into<sup>E</sup> the<sup>R</sup> woods<sup>S</sup>

17. when<sup>C</sup> the<sup>R</sup> evening<sup>S</sup> came<sup>V</sup>

18. snowwhite<sup>S</sup> noticed<sup>V</sup> a<sup>R</sup> little<sup>A</sup> house<sup>S</sup>

19. she<sup>P</sup> entered<sup>V</sup> to<sup>Z</sup> rest<sup>V</sup>

20. everything<sup>P</sup> in<sup>E</sup> the<sup>R</sup> little<sup>A</sup> house<sup>S</sup> was<sup>V</sup> tiny<sup>A</sup>

21. the<sup>R</sup> table<sup>S</sup> was covered<sup>V</sup> with<sup>E</sup> a<sup>R</sup> white<sup>A</sup> cloth<sup>S</sup>

22. it<sup>P</sup> was laid<sup>V</sup> with<sup>E</sup> seven<sup>D</sup> little<sup>A</sup> plates<sup>S</sup>

23. each<sup>D</sup> plate<sup>S</sup> had<sup>V</sup> its<sup>D</sup> little<sup>A</sup> spoon<sup>S</sup>

24. there were<sup>V</sup> seven<sup>D</sup> knives<sup>S</sup> seven<sup>S</sup> forks<sup>S</sup> seven<sup>D</sup> little<sup>A</sup> glasses<sup>S</sup>

25. snowwhite<sup>S</sup> feel<sup>V</sup> asleep<sup>A</sup> on<sup>E</sup> a<sup>R</sup> little<sup>A</sup> bed<sup>S</sup>

26. when<sup>C</sup> the<sup>R</sup> night<sup>S</sup> came<sup>V</sup>

27. the<sup>R</sup> masters<sup>S</sup> of<sup>E</sup> the<sup>R</sup> house<sup>S</sup> came back<sup>V</sup>

28. they<sup>P</sup> were<sup>V</sup> dwarfs<sup>S</sup> that<sup>Z</sup> dug<sup>V</sup> gold<sup>S</sup> from<sup>E</sup> the<sup>R</sup> mountains<sup>S</sup>

29. the<sup>R</sup> dwarfs<sup>S</sup> noticed<sup>V</sup> that<sup>Z</sup> someone<sup>P</sup> had entered<sup>V</sup>

30. a<sup>R</sup> dwarf<sup>S</sup> asked<sup>V</sup>

31. who<sup>P</sup> took<sup>V</sup> a<sup>R</sup> bite<sup>S</sup> from<sup>E</sup> my<sup>D</sup> sandwich<sup>S</sup>

32. another<sup>D</sup> dwarf<sup>S</sup> said<sup>V</sup>

33. who<sup>P</sup> used<sup>V</sup> my<sup>D</sup> little<sup>A</sup> fork<sup>S</sup>

34. in<sup>E</sup> the<sup>R</sup> morning<sup>S</sup> snowwhite<sup>S</sup> woke up<sup>V</sup>

35. the<sup>R</sup> dwarfs<sup>S</sup> asked<sup>V</sup> snowwhite<sup>S</sup> with<sup>E</sup> kindness<sup>S</sup>

36. what<sup>P</sup> is<sup>V</sup> your<sup>D</sup> name<sup>S</sup>

37. my<sup>D</sup> name<sup>S</sup> is<sup>V</sup> snowwhite<sup>S</sup>

38. she<sup>P</sup> answered<sup>V</sup> to<sup>E</sup> the<sup>R</sup> dwarfs<sup>S</sup>

39. how<sup>B</sup> did you get<sup>V</sup> to<sup>E</sup> our<sup>D</sup> little<sup>A</sup> house<sup>S</sup>

40. the<sup>R</sup> dwarfs<sup>S</sup> asked<sup>V</sup>

41. snowwhite<sup>S</sup> replied<sup>V</sup> that<sup>Z</sup> the<sup>R</sup> queen<sup>S</sup> wanted<sup>V</sup> to<sup>Z</sup> kill<sup>V</sup> her<sup>P</sup>

42. but<sup>C</sup> she<sup>P</sup> escaped<sup>V</sup> to<sup>E</sup> the<sup>R</sup> dwarfs<sup>S</sup>

43. one<sup>R</sup> of<sup>E</sup> the<sup>R</sup> dwarfs<sup>S</sup> asked<sup>V</sup> snowwhite<sup>S</sup> to<sup>Z</sup> stay<sup>V</sup> with<sup>E</sup> them<sup>P</sup> in<sup>E</sup> the<sup>R</sup> little<sup>A</sup> house<sup>S</sup>

44. snowwhite<sup>S</sup> happily<sup>B</sup> agreed<sup>V</sup>

45. during<sup>E</sup> the<sup>R</sup> day<sup>S</sup> the<sup>R</sup> dwarfs<sup>S</sup> would go<sup>V</sup> to<sup>E</sup> the<sup>R</sup> mountains<sup>S</sup> to<sup>Z</sup> dig<sup>V</sup> for<sup>E</sup> gold<sup>S</sup>

46. snowwhite<sup>S</sup> would stay<sup>V</sup> alone<sup>A</sup> in<sup>E</sup> the<sup>R</sup> little<sup>A</sup> house<sup>S</sup>

47. meanwhile<sup>B</sup> in<sup>E</sup> the<sup>R</sup> castle<sup>S</sup> the<sup>R</sup> queen<sup>S</sup> asked<sup>V</sup> the<sup>R</sup> mirror<sup>S</sup>

48. who<sup>P</sup> is<sup>V</sup> beautiful<sup>A</sup> unlike<sup>E</sup> any<sup>D</sup> other<sup>P</sup> in<sup>E</sup> this<sup>D</sup> castle<sup>S</sup>

49. the<sup>R</sup> mirror<sup>S</sup> answered<sup>V</sup>

50. you<sup>P</sup> are<sup>V</sup> beautiful<sup>A</sup> unlike<sup>E</sup> any<sup>D</sup> other<sup>P</sup> in<sup>E</sup> the<sup>D</sup> castle<sup>S</sup>

51. but<sup>C</sup> snowwhite<sup>S</sup> in<sup>E</sup> the<sup>R</sup> little<sup>A</sup> house<sup>S</sup> is<sup>V</sup> beautiful<sup>A</sup> unlike<sup>E</sup> any<sup>D</sup> other<sup>P</sup>

52. the<sup>R</sup> queen<sup>S</sup> realised<sup>V</sup> the<sup>R</sup> trick<sup>S</sup> of<sup>E</sup> the<sup>R</sup> huntsman<sup>S</sup>

53. and<sup>C</sup> she<sup>P</sup> said<sup>V</sup>

54. then<sup>B</sup> i<sup>P</sup> will kill<sup>V</sup> snowwhite<sup>S</sup> myself<sup>P</sup>

55. she<sup>P</sup> disguised<sup>V</sup> as<sup>E</sup> an<sup>R</sup> old<sup>A</sup> witch<sup>S</sup>

56. she<sup>P</sup> went<sup>V</sup> to<sup>E</sup> the<sup>R</sup> little<sup>A</sup> house<sup>S</sup> of<sup>E</sup> the<sup>R</sup> seven<sup>A</sup> dwarfs<sup>S</sup>

57. snowwhite<sup>S</sup> didn't recognise<sup>V</sup> the<sup>R</sup> queen<sup>S</sup>

58. she<sup>P</sup> opened<sup>V</sup> the<sup>R</sup> door<sup>S</sup> to<sup>E</sup> the<sup>R</sup> old<sup>A</sup> woman<sup>S</sup>

59. the<sup>R</sup> disguised<sup>A</sup> queen<sup>S</sup> offered<sup>V</sup> snowwhite<sup>S</sup> a<sup>R</sup> poisoned<sup>A</sup> apple<sup>S</sup>

60. snowwhite<sup>S</sup> didn't know<sup>V</sup> that<sup>Z</sup> the<sup>R</sup> apple<sup>S</sup> was<sup>V</sup> poisoned<sup>A</sup>

61. she<sup>P</sup> bit<sup>V</sup> it<sup>P</sup>

62. she<sup>P</sup> immediately<sup>B</sup> fell<sup>V</sup> in<sup>E</sup> a<sup>R</sup> deep<sup>A</sup> sleep<sup>S</sup>
