# Supplementary material
Source: ML conference proceedings conference paper supplement (https://aclanthology.org/2021.teachingnlp-1.7)
Supplement: OptionalSupplementaryMaterial [file Biancaneve_it_dings_cards_activity_1.even.pdf › materials/tmp/Biancaneve_it_dings_cards_activity_1.even.pdf]

*nano*

*la*

*casina*

*specchio*

*a*

*altro*

*biancaneve*

*riconobbe*



*casina*

*specchio*

*a*

*vecchia*

*specchio*

*a*

*lo*

*disse*



*il*

*quel*

*i*

*chiesero*

*la*

*pidocchio*
