# Supplementary material
Source: ML conference proceedings conference paper supplement (https://aclanthology.org/2021.teachingnlp-1.7)
Supplement: OptionalSupplementaryMaterial [file Biancaneve_it_dings_cards_activity_1.odd.pdf › materials/tmp/Biancaneve_it_dings_cards_activity_1.odd.pdf]

*un*

*riconobbe*

*nostra*

*lo*

*rispose*

*un*

*nano*

*non*



*la*

*lo*

*disse*

*la*

*lo*

*disse*

*biancaneve*

*specchio*



*a*

*re*

*giorno*

*nani*

*a*

*vecchia*
