# Supplementary material
Source: ML conference proceedings conference paper supplement (https://aclanthology.org/2021.teachingnlp-1.7)
Supplement: OptionalSupplementaryMaterial [file Biancaneve_it_dings_cards_activity_1.pdf › materials/tmp/Biancaneve_it_dings_cards_activity_1.pdf]

*un*

*nano*

*riconobbe*

*la*

*nostra*

*casina*

*lo*

*specchio*



*rispose*

*a*

*un*

*altro*

*nano*

*biancaneve*

*non*

*riconobbe*



*la*

*casina*

*lo*

*specchio*

*disse*

*a*

*la*

*vecchia*



*lo*

*specchio*

*disse*

*a*

*biancaneve*

*lo*

*specchio*

*disse*



*a*

*il*

*re*

*quel*

*giorno*

*i*

*nani*

*chiesero*



*a*

*la*

*vecchia*

*pidocchio*
