# Supplementary material
Source: ML conference proceedings conference paper supplement (https://aclanthology.org/2021.teachingnlp-1.7)
Supplement: OptionalSupplementaryMaterial [file Biancaneve_it_dings_cards_activity_2.pdf › materials/out/Biancaneve_it_dings_cards_activity_2.pdf]

$il$

R

$il$

R

$il$

R

$il$

R

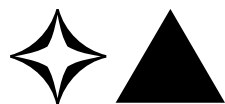

0

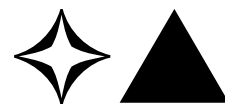

0

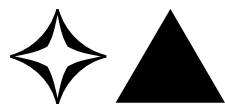

0

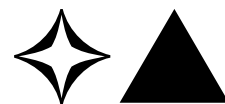

0

$l o$

R

$l a$

R

$l o$

R

$l a$

R

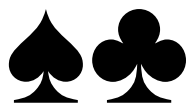

0

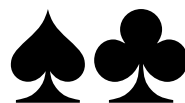

0

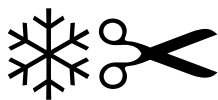

0

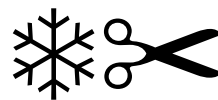

0

$la$

R

$i$

R

$la$

R

$i$

R

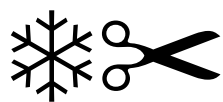

0

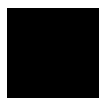

0

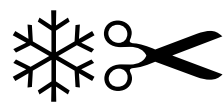

0

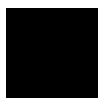

0

*un*

R

*un*

R

*un*

R

*un*

R

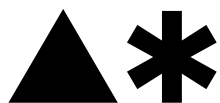

0

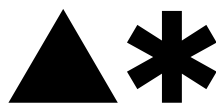

0

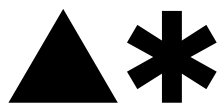

0

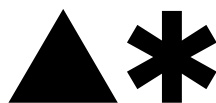

0

*uno*

R

*uno*

R

*uno*

R

*uno*

R

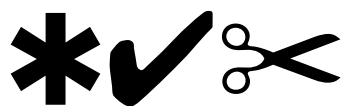

0

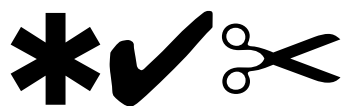

0

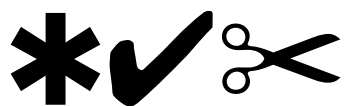

0

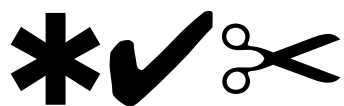

0

*una*

R

*una*

R

*una*

R

*una*

R

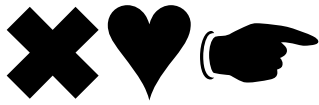

0

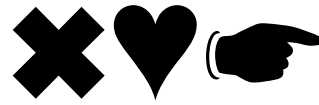

0

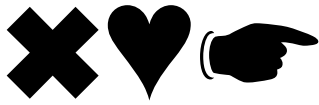

0

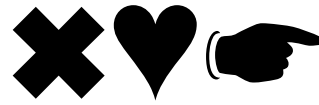

0

*quel*

D

*quel*

D

*questo*

D

*questo*

D

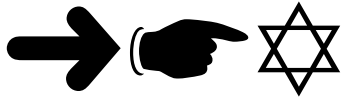

6

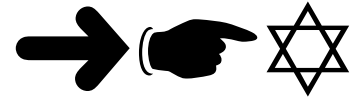

6

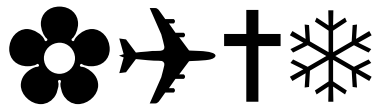

6

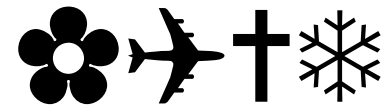

6

*ogni*

D

*e*

C

*ogni*

D

*e*

C

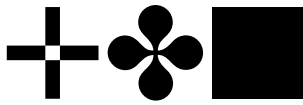

6

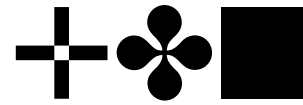

6

+

7

+

7

*e*  
C

*e*  
C

*ma*  
C

*ma*  
C

$\dagger$   
7

$\dagger$   
7

$\dagger \rightarrow$   
7

$\dagger \rightarrow$   
7

*in*

E

*in*

E

*a*

E

*a*

E

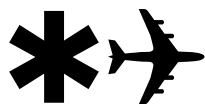

4

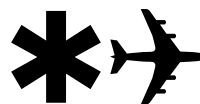

4

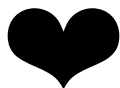

4

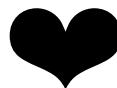

4

*di*

E

*di*

E

*con*

E

*con*

E

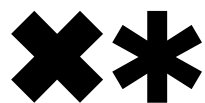

4

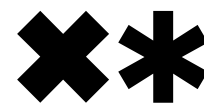

4

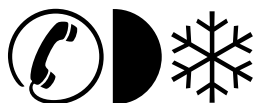

4

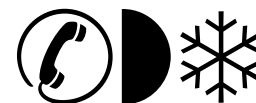

4

*lei*

P

*lei*

P

*lui*

P

*lui*

P

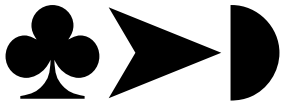

8

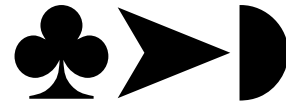

8

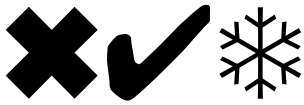

8

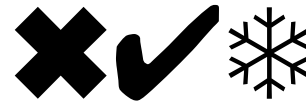

8

*chi*

P

*non*

B

*chi*

P

*non*

B

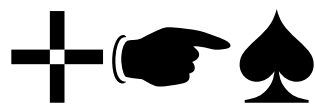

8

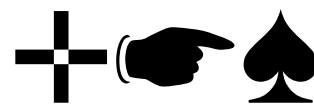

8

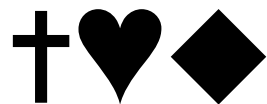

5

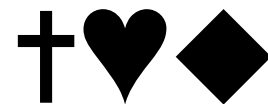

5

*donna*

S

*nani*

S

*biancaneve*

S

*bambina*

S

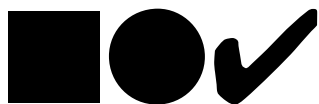

1

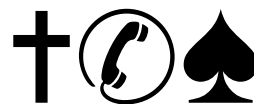

1

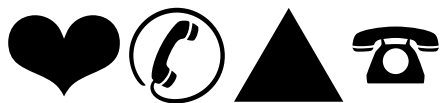

1

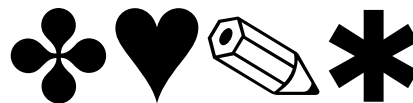

1

*specchio*

S

*regina*

S

*principe*

S

*re*

S

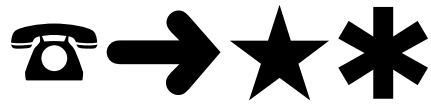

1

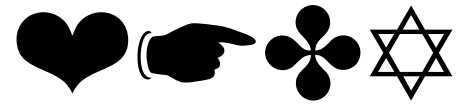

1

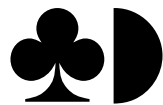

1

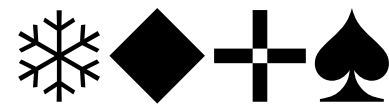

1

*pomeriggio*

S

*albergo*

S

*bottiglia*

S

*sera*

S

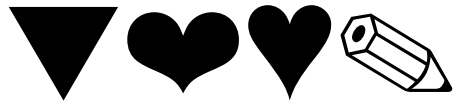

1

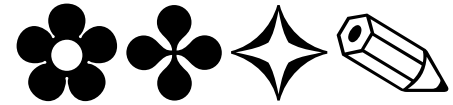

1

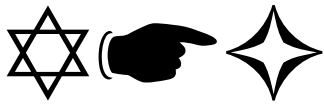

1

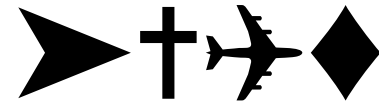

1

*gentilezza*

S

*banana*

S

*piscina*

S

*bosco*

S

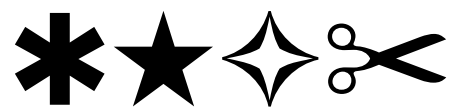

1

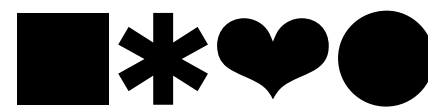

1

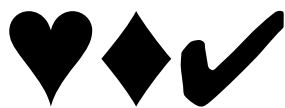

1

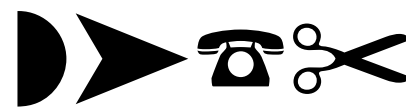

1

*lampada*

S

*finestra*

S

*sedano*

S

*ragno*

S

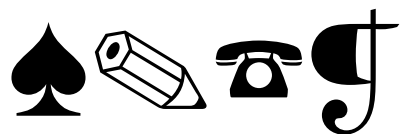

1

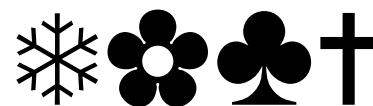

1

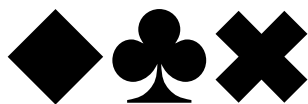

1

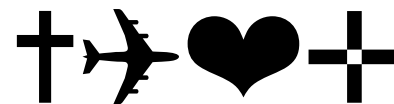

1

*bicicletta*

S

*volpe*

S

*rispose*

V

*foresta*

S

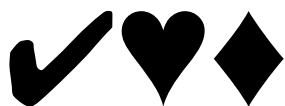

1

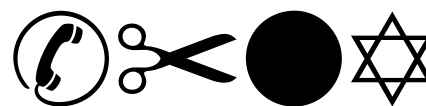

1

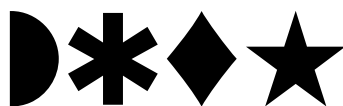

1

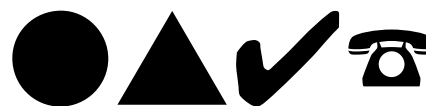

2

*diede*

V

*era*

V

*disse*

V

*si svegliò*

V

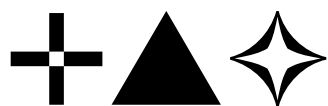

2

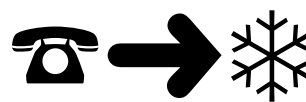

2

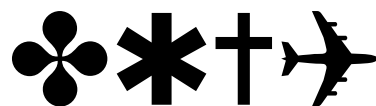

2

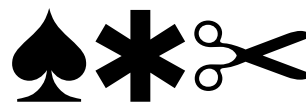

2

*riconobbe*

V

*spezzò*

V

*comprò*

V

*correva*

V

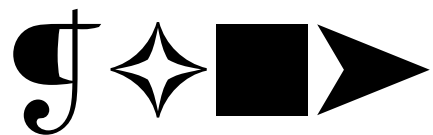

2

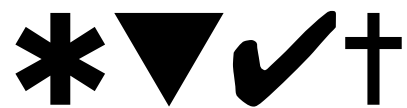

2

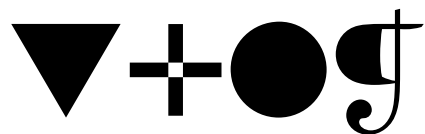

2

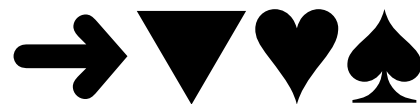

2

*dormiva*

V

*mangiava*

V

*allegra*

A

*allegro*

A

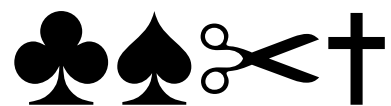

2

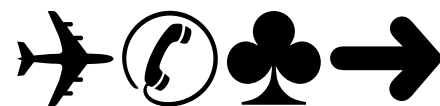

2

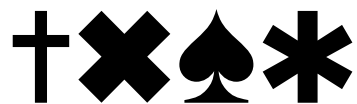

3

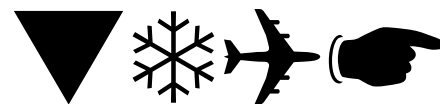

3

*triste*

A

*felice*

A

*di*

Z

*di*

Z

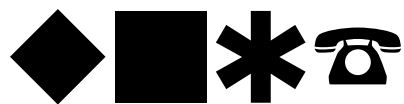

3

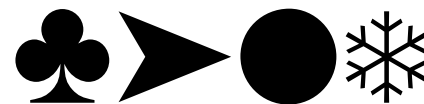

3

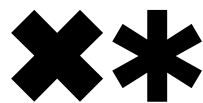

9

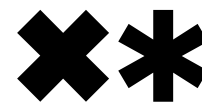

9

*che*

Z

*che*

Z

*per*

Z

*per*

Z

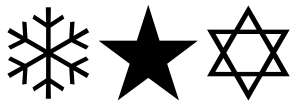

9

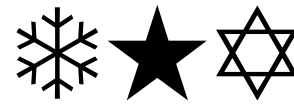

9

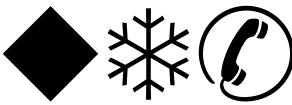

9

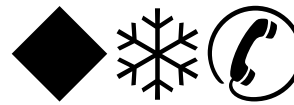

9
