# Supplementary material
Source: ML conference proceedings conference paper supplement (https://aclanthology.org/2021.teachingnlp-1.7)
Supplement: OptionalSupplementaryMaterial [file Biancaneve_it_dings_dict.pdf › materials/out/Biancaneve_it_dings_dict.pdf]

# === WORD DICTIONARY

===

❄️♦️+♠️ principe  
 ❄️♦️➡️† ucciderò  
 ❄️✂️ la  
 ❄️☞♠️ nano  
 ❄️✓☞✍️ forchette  
 ❄️★♣️ suo  
 ❄️★☆ che  
 ❄️♣️♣️† lampada  
 ●■♣️ sposò  
 ●▲✓☞ rispose  
 ●▲†☆☞ era entrato  
 ●♠️▼➡️ piattini  
 ●♣️✂️ cosa  
 ■ i  
 ■●✍️ sola  
 ■●✓ nani  
 ■▼♣️\*✂️ si accorsero  
 ■♠️☞✂️ ha usato  
 ■†★➡️ estraevano  
 ■★✍️ oro  
 ■\*♥️● gentilezza  
 ▲■♦️✍️ allora  
 ▲☞♥️★ minuscola  
 ▲♠️♥️ tempo  
 ▲☞✓ senza  
 ▲✓★♥️♣️ era  
 ricoperto  
 ▲\* un  
 ▼❄️✂️☞ allegra  
 ▼■✍️ del  
 ▼♥️♥️✍️ albergo

▼☞♠️♣️ piccola  
 ▼✂️●☞ rimaneva  
 ▼+●♣️ correva  
 ♦️❄️☞ per  
 ♦️❄️♣️✂️ castello  
 ♦️■✂️❄️ accettò  
 ♦️■†♣️ stessa  
 ♦️■\*☞ felice  
 ♦️♣️❄️☆ arrivò  
 ♦️♣️✂️ ragno  
 ♦️✂️● capì  
 ♦️✍️♣️ bimba  
 ♦️✍️♥️\* casina  
 ♦️✓♠️ aveva  
 ☞▲▼☞ lettino  
 ☞➡️†♣️ vecchia  
 ☞➡️☞✂️ piscina  
 ☞✓+ sette  
 ☞+▲ notte  
 ☞♣️♦️➡️ ci erano  
 ☞\*♦️★ foresta  
 ☞\*✂️■ voleva  
 ♣️▲☞♣️ mattino  
 ♣️☞ su  
 ♣️✂️☞ spezzò  
 ♥️ a  
 ♥️➡️❄️ pezzo  
 ♥️☞▲☞ bambina  
 ♥️☞♣️☆ specchio  
 ♥️+■▲✓ sei  
 arrivata  
 ♣️▼♥️✓ intanto  
 ♣️☞ re

♣♦→★ andavano  
 ♣♠✂<† mangiava  
 ♣➤●❄ triste  
 ♣➤♠ lei  
 ♣☞+➤ tovaglia  
 ♦▼†✧ subito  
 ♦♠✈ porta  
 ♦Ⓢ 1'  
 ♦✓▼ ebbe  
 ♥♦✂☞ nevosa  
 ♥♦✓ bosco  
 ♥✂➤ altro  
 ♥\*✧ sei  
 ♠●♥♥ chiesero  
 ♠▼♣✧ chiamarono  
 ♠♣ lo  
 ♠☞☞ finestra  
 ♠★☞♦ ti chiami  
 ♠\*✂ disse  
 →❄Ⓢ monti  
 →▼♥♠ comprò  
 →✂✕ mela  
 →☞☆ quel  
 →☞Ⓢ✕ bianca  
 →+✧● mi chiamo  
 →★✓☆ padroni  
 ➤♣☞+ strega  
 ➤♠†♦♥ profondissimo  
 ➤→✈❄ ragazza  
 ➤✈● come  
 ➤☞♣ aprì  
 ➤☞♦☆ durante  
 ➤†✈♦ bottiglia

✂▼●✓ cuciva  
 ✂☞♣+ tornarono  
 ✂✕☞★ giornata  
 ✂<†♣★ possedeva  
 ☞▲♠♣ sapeva  
 ☞→❄ diede  
 ☞→★\* regina  
 ☞→♣ entrò  
 ☞†♥\* rivali  
 ☞☆♣ loro  
 ☞★♥ offrì  
 Ⓢ♠❄ con  
 Ⓢ♣☞ vide  
 Ⓢ♦♦❄ avvelenata  
 Ⓢ♥✈▲ rimanere  
 Ⓢ✂●☆ bicicletta  
 Ⓢ✓♦✕ guardava  
 Ⓢ✕✓➤ ordinò  
 ✈■→†♦ era  
 apparecchiato  
 ✈Ⓢ♣→ dormiva  
 ✈✓♣\* qualcuno  
 ✈†☆ bella  
 ☞❄+ hai  
 ☞●❄✕ giorno  
 ☞■♥ casa  
 ☞✂▼❄ cacciatore  
 ☞☞♥ sonno  
 ☞❄✓Ⓢ scappare  
 ✓♥♣♣→ si  
 addormentò  
 ✓♥♦ volpe  
 ✓†☞✂ riuscì

✓★✂ dopo  
 ✕❄♦♣ nostra  
 ✕▼✍✓ chiedeva  
 ✕♥☞ una  
 ✕✂ io  
 ✕✓❄ lui  
 ✕\* di  
 +▲♣■ travestita  
 +▲✧ era  
 +♠ tu  
 +♠♠■ piattino  
 +♠✧✍ cercare  
 +♥▼✂ pidocchio  
 +➤▼ morse  
 +☞♠ chi  
 +✓♣♥▲ si travestì  
 +♣■ ogni  
 +\*➤➤ diceva  
 † e  
 †❄\*▼ chiese  
 †♠✕ coltelli  
 †♦ da  
 †♥♦ non  
 †➔ ma  
 †☞♠ donna  
 †✈♥+ sedano  
 †✕♠\* allegro  
 †♣\*♦ rispondeva  
 ✧☞✧ sera  
 ✧✍♠ erano  
 ✧+▼☞ qualche  
 ✧†♠ uccidere  
 ✧✧☞☞\* bicchierini

♣ è  
 ♣❄♦♥ candida  
 ♣■♠♠ riposare  
 ♣▼♥ cadde  
 ♣♥☞ morte  
 ♣♦♦☞ quando  
 ♣♥✍\* biancaneve  
 ♣+♥✈ panino  
 ♣\*†✈ si svegliò  
 ✧▲ il  
 ✧♦✈▼♥ forchettina  
 ★●➔ andò  
 ★♥☞▼ ha preso  
 ★➔ le  
 ★➤♣\* tavolino  
 ★✓☞ mio  
 \*▼✓† riconobbe  
 \*♠✈❄ inganno  
 \*♦☞ mia  
 \*✈ in  
 \*☞♣✍ cucchiaino  
 \*✓✂ uno  
 \*★✧✂ banana  
 ♣●♠ neve  
 ♣✈†❄ questo  
 ♣✈✧ scese  
 ♣✍♦➔ gelosa  
 ♣♣✧☞ pomeriggio  
 === POS DICTIONARY  
 ===  
 A 3  
 B 5  
 C 7

|   |   |
|---|---|
| D | 6 |
| E | 4 |
| P | 8 |
| R | 0 |
| S | 1 |
| V | 2 |
| Z | 9 |
