# Supplementary material
Source: ML conference proceedings conference paper supplement (https://aclanthology.org/2021.teachingnlp-1.7)
Supplement: OptionalSupplementaryMaterial [file Biancaneve_it_dings_translated.pdf › materials/out/Biancaneve_it_dings_translated.pdf]

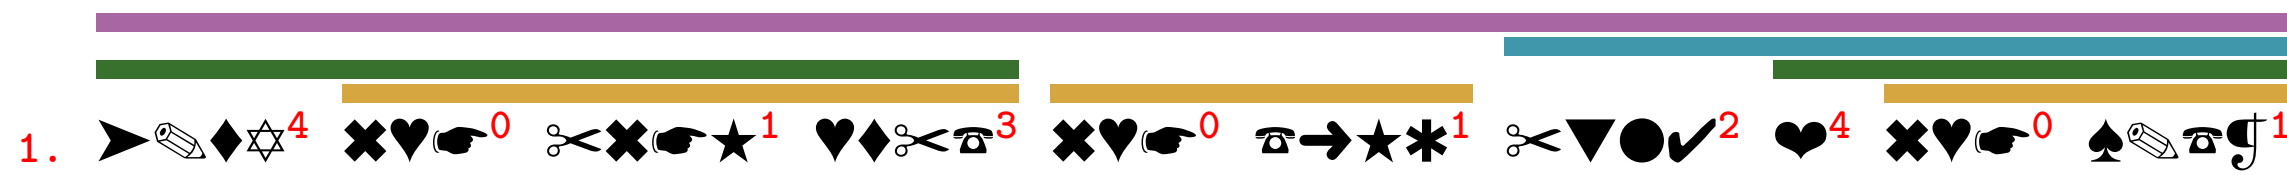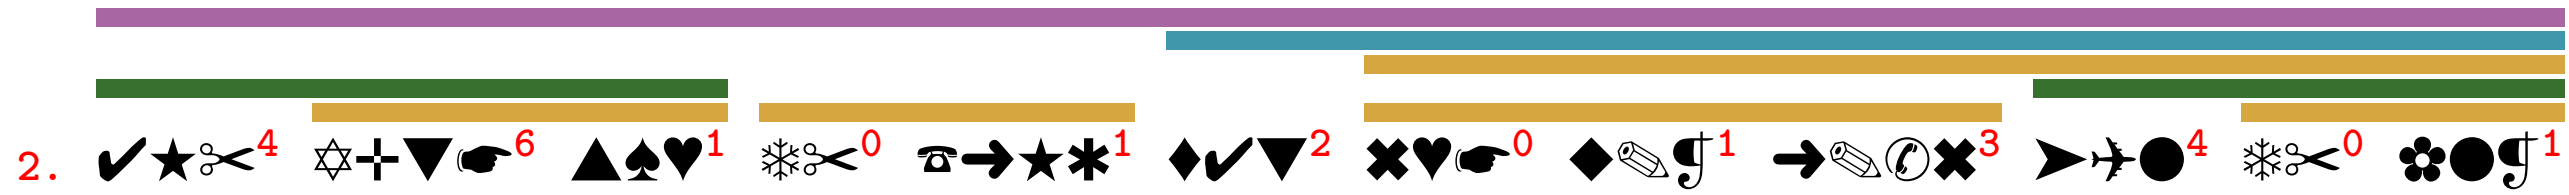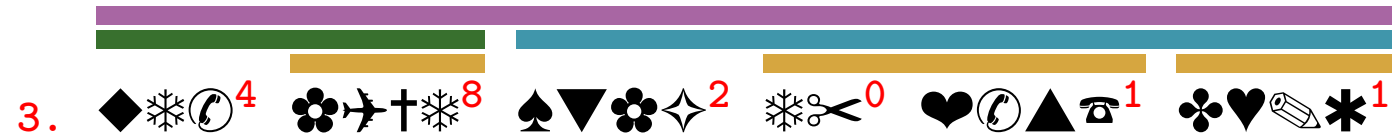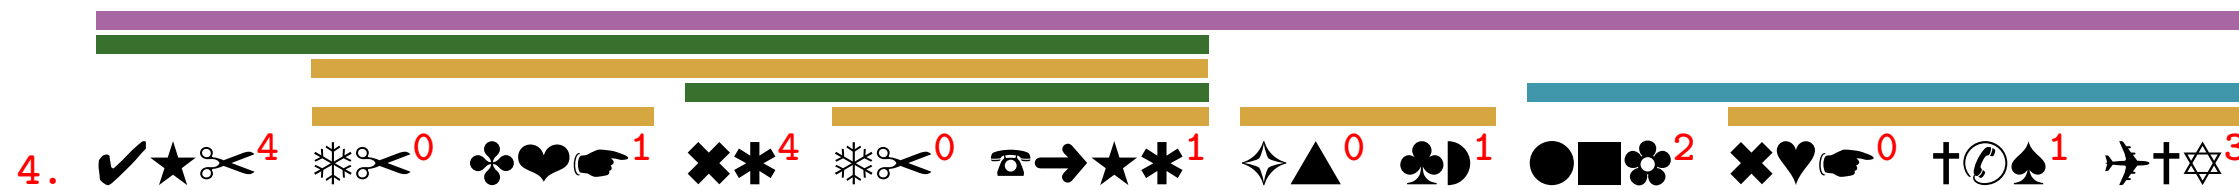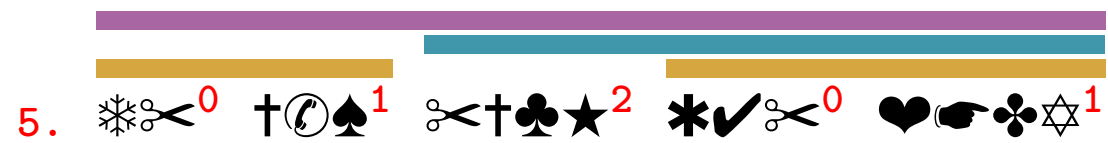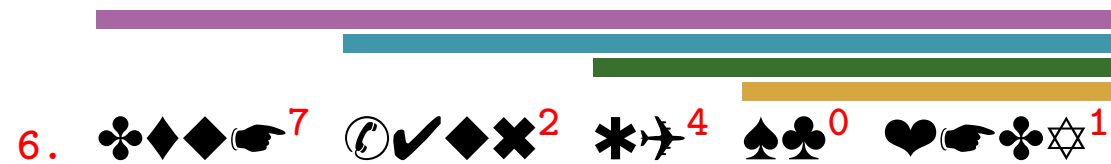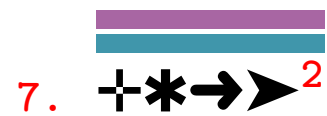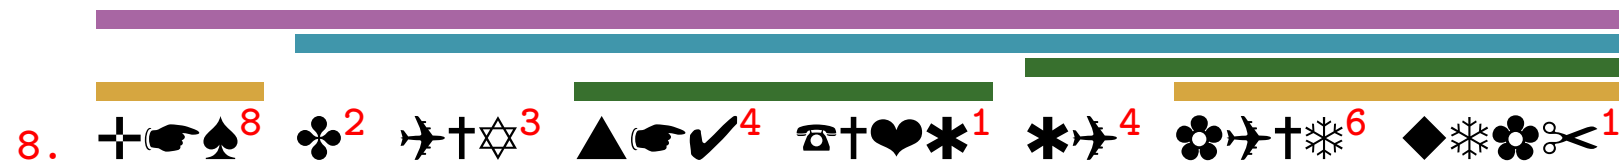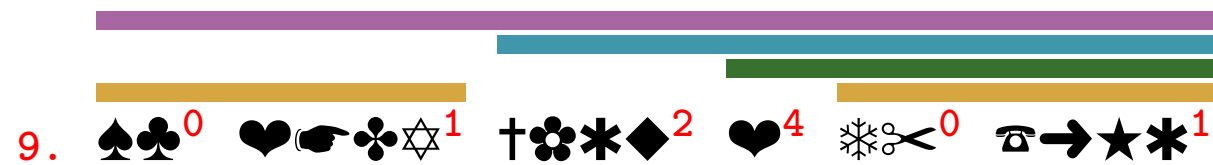

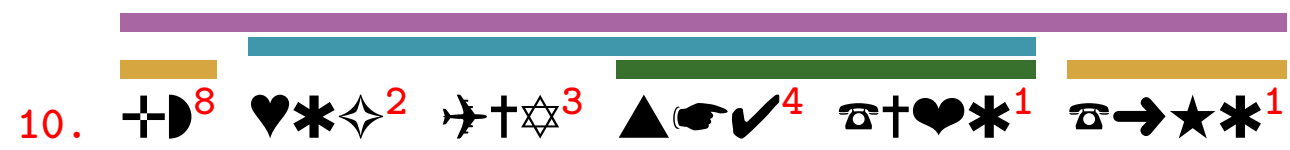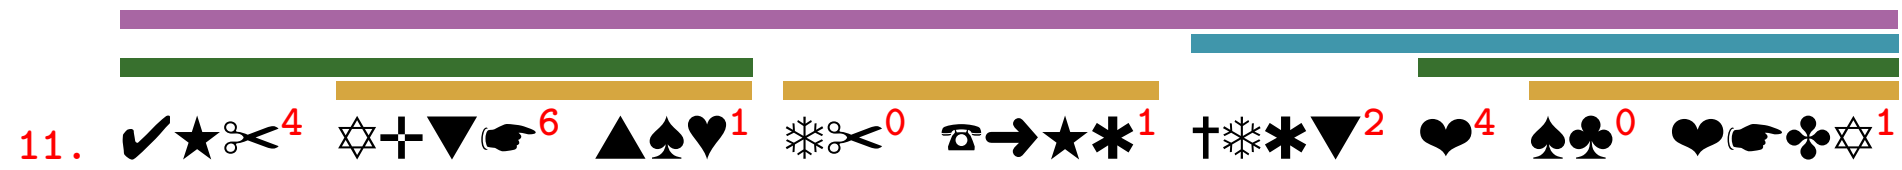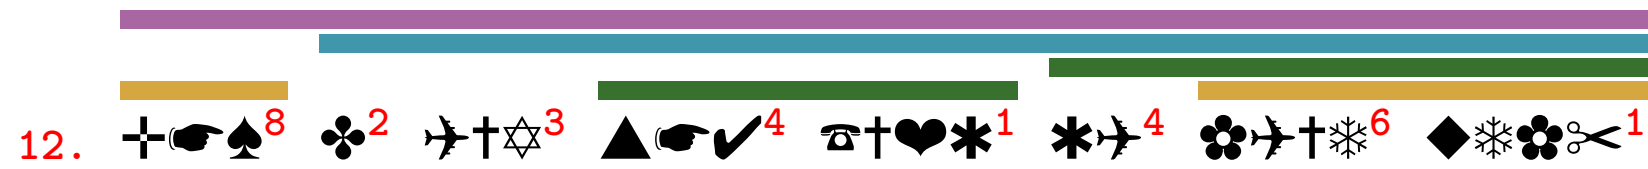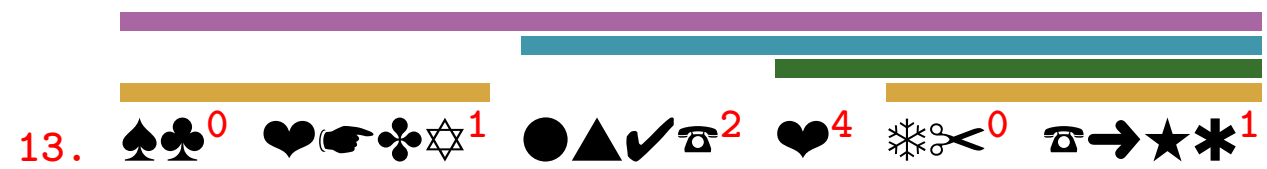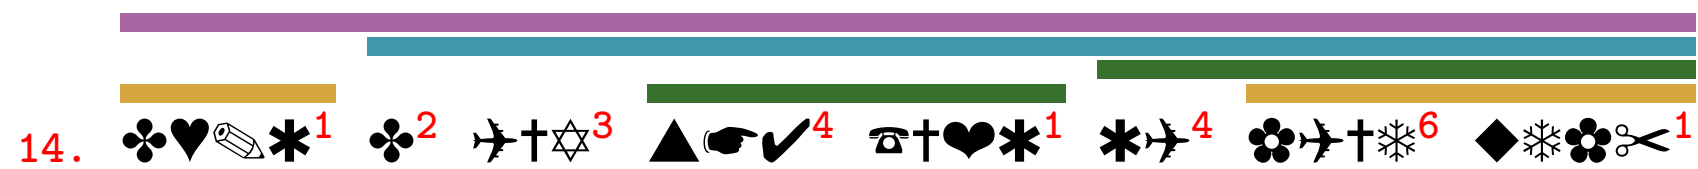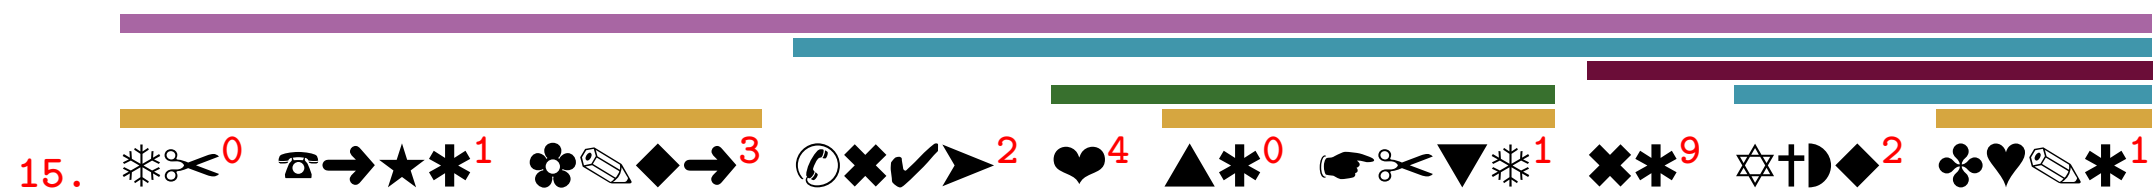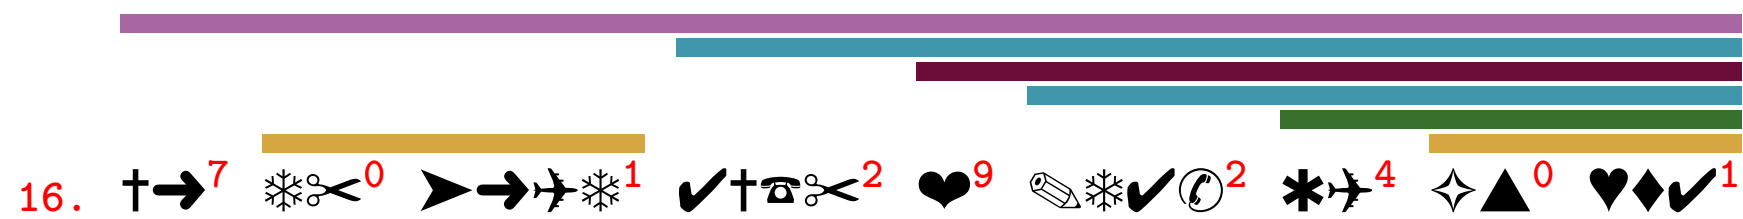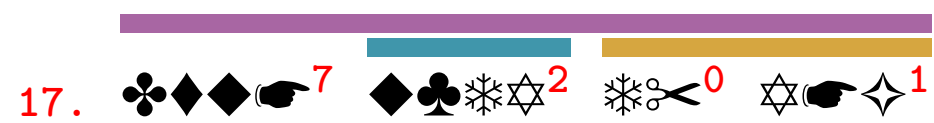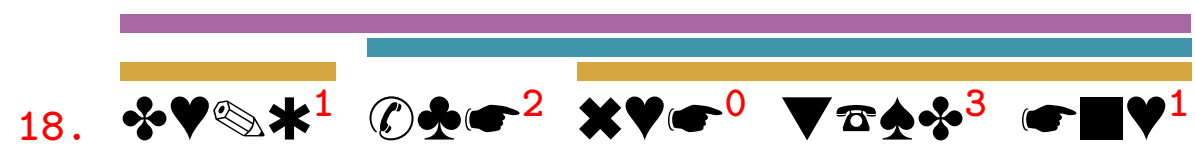

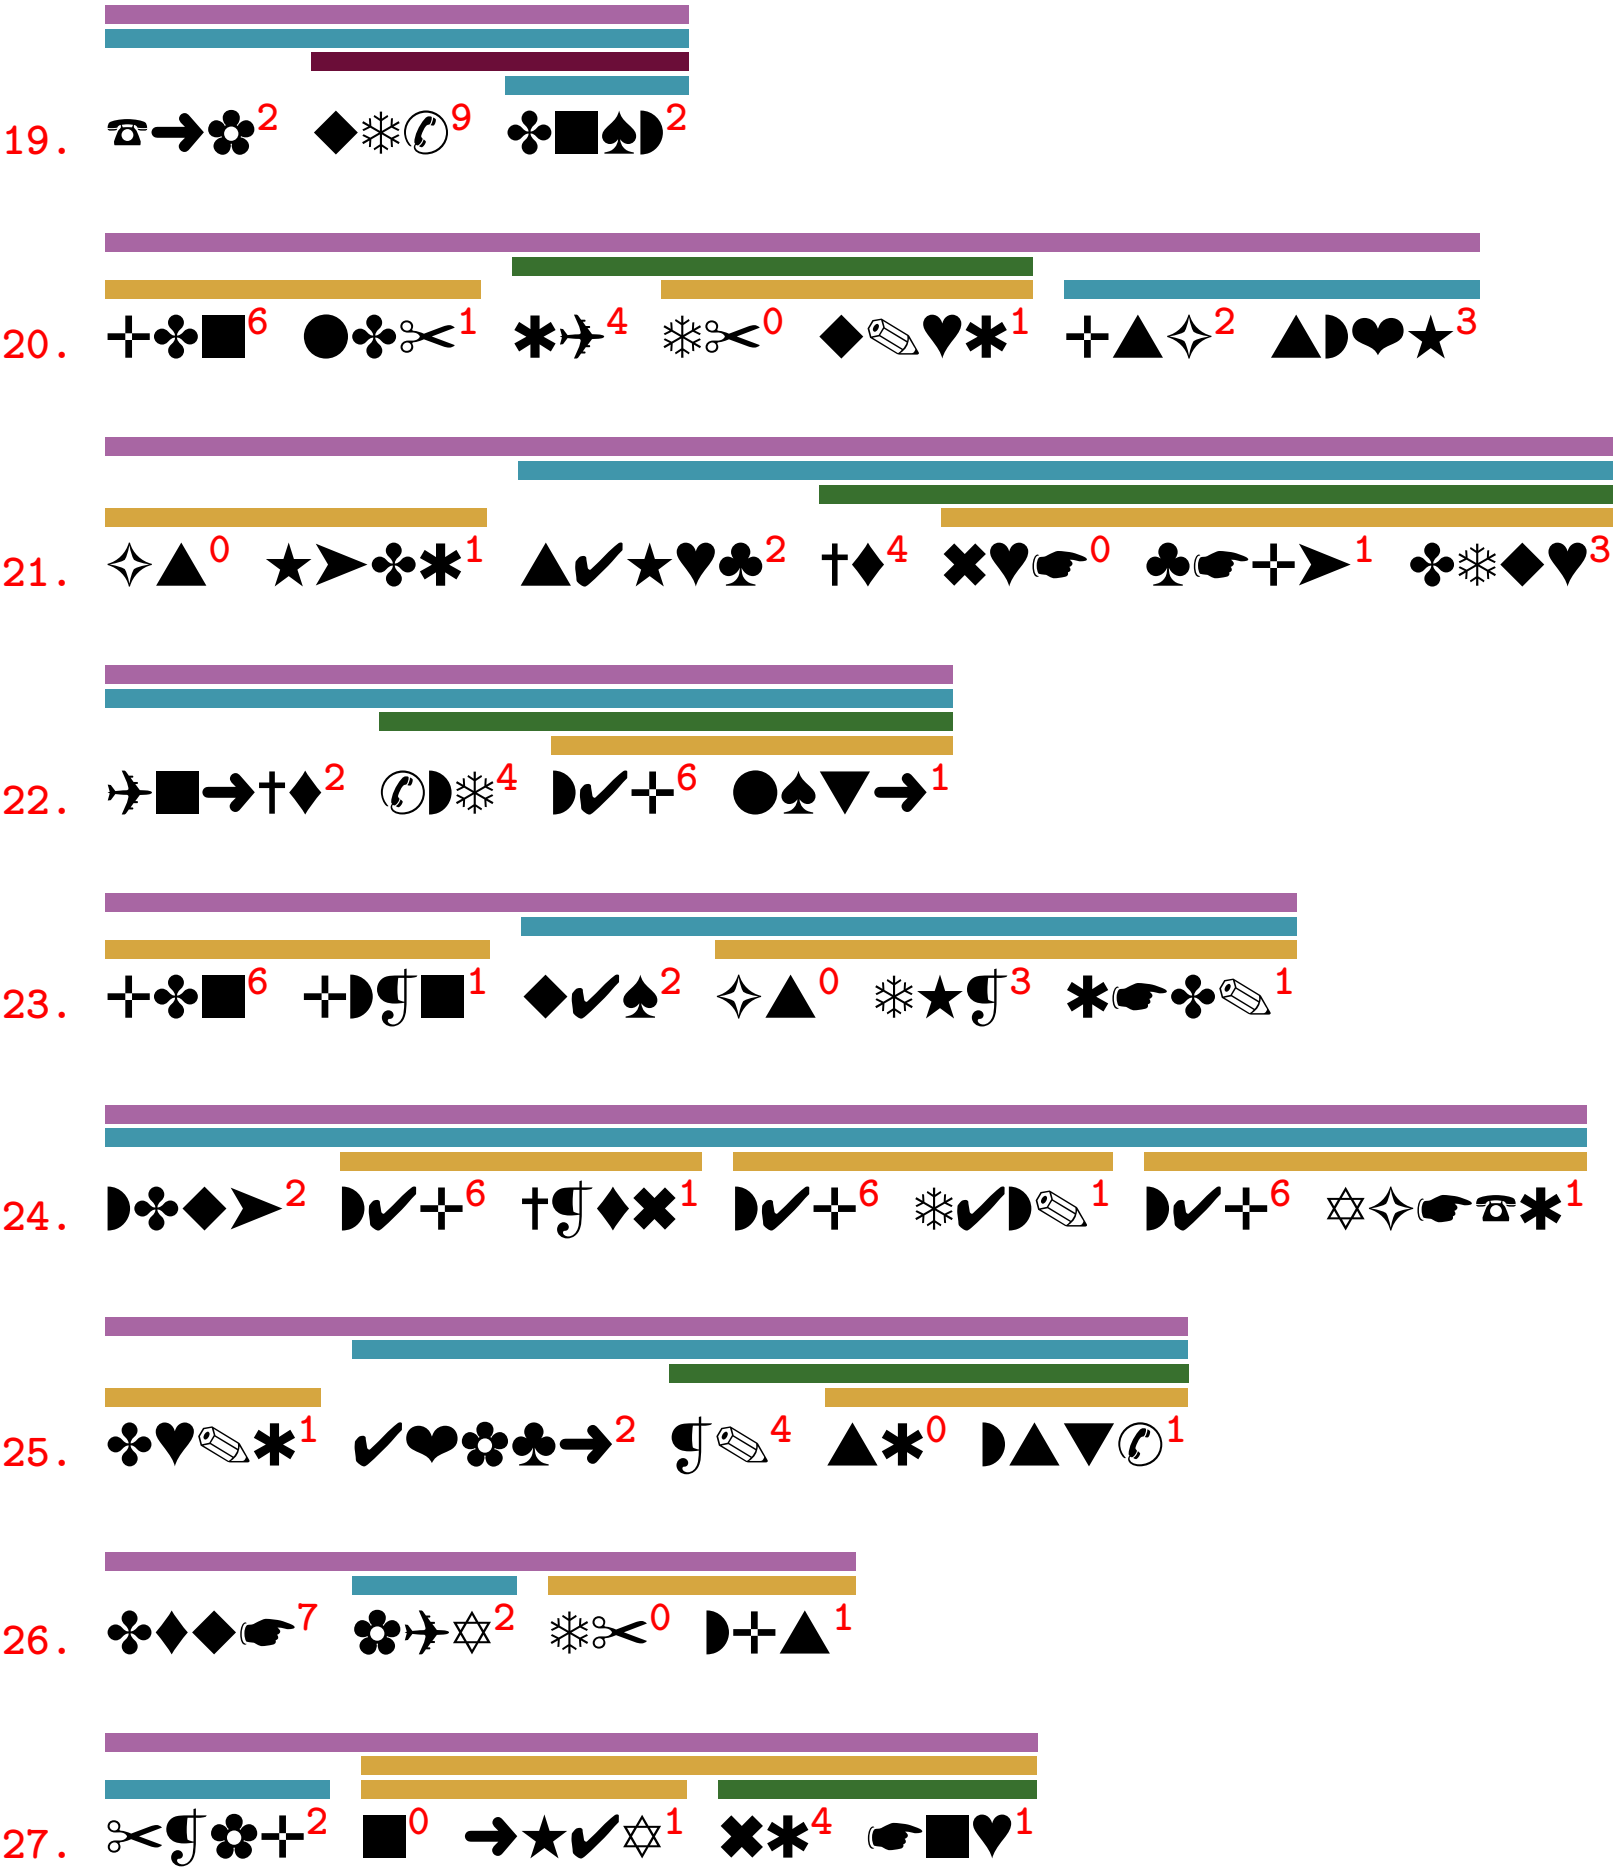

28. <sup>2</sup> <sup>1</sup> <sup>9</sup> <sup>2</sup> <sup>0</sup> <sup>1</sup> <sup>4</sup> <sup>0</sup> <sup>1</sup>

29. <sup>0</sup> <sup>1</sup> <sup>2</sup> <sup>9</sup> <sup>2</sup> <sup>8</sup>

30. <sup>0</sup> <sup>1</sup> <sup>2</sup>

31. <sup>8</sup> <sup>2</sup> <sup>0</sup> <sup>1</sup> <sup>4</sup> <sup>0</sup> <sup>6</sup> <sup>1</sup>

32. <sup>0</sup> <sup>3</sup> <sup>1</sup> <sup>2</sup>

33. <sup>8</sup> <sup>2</sup> <sup>0</sup> <sup>3</sup> <sup>1</sup>

34. <sup>4</sup> <sup>0</sup> <sup>1</sup> <sup>1</sup> <sup>2</sup>

35. <sup>0</sup> <sup>1</sup> <sup>2</sup> <sup>4</sup> <sup>1</sup> <sup>4</sup> <sup>1</sup>

36. <sup>5</sup> <sup>2</sup>

37. <sup>2</sup> <sup>1</sup>

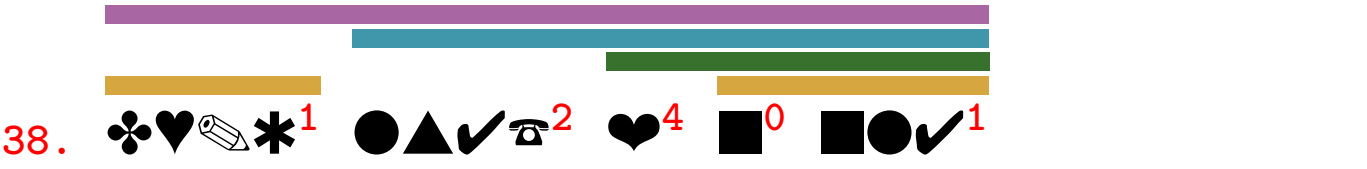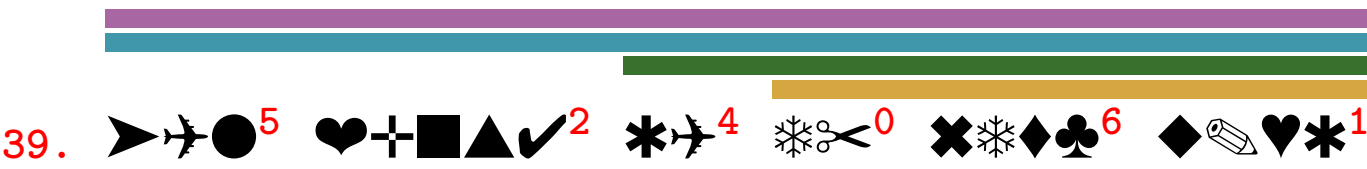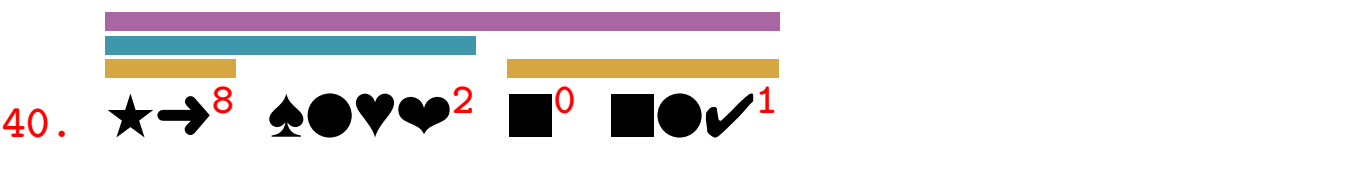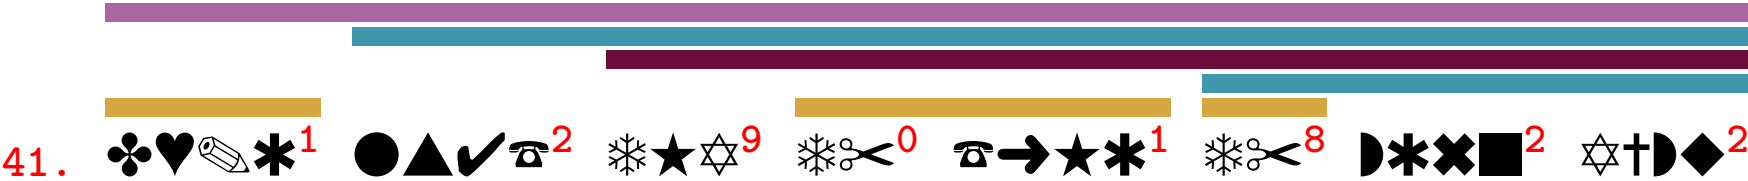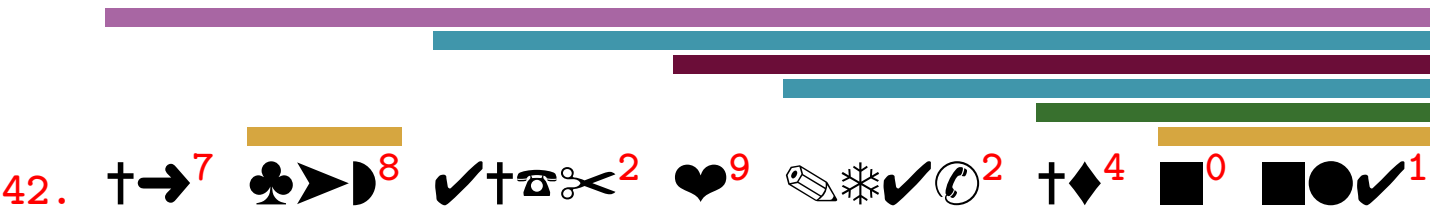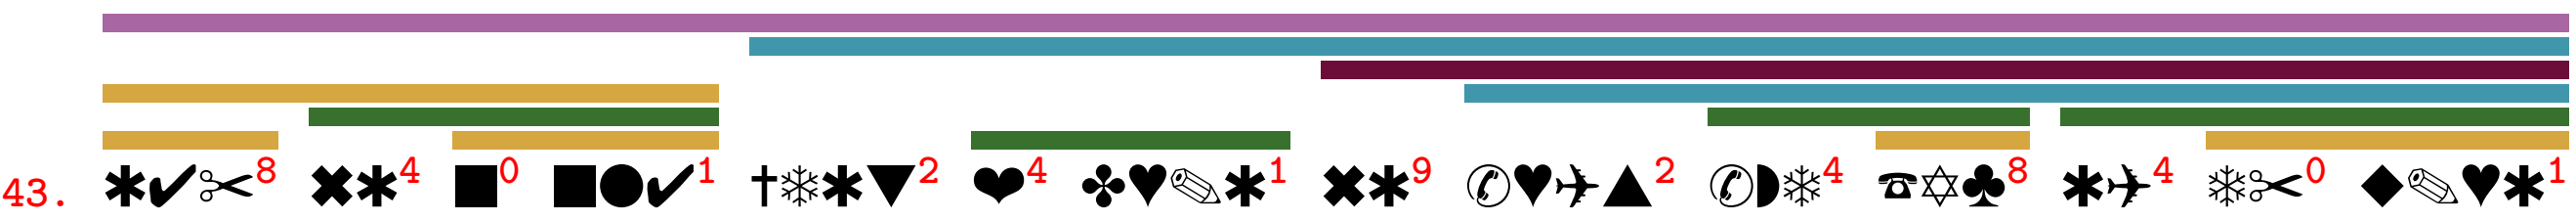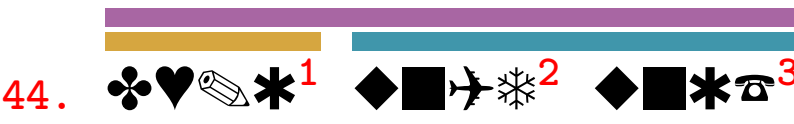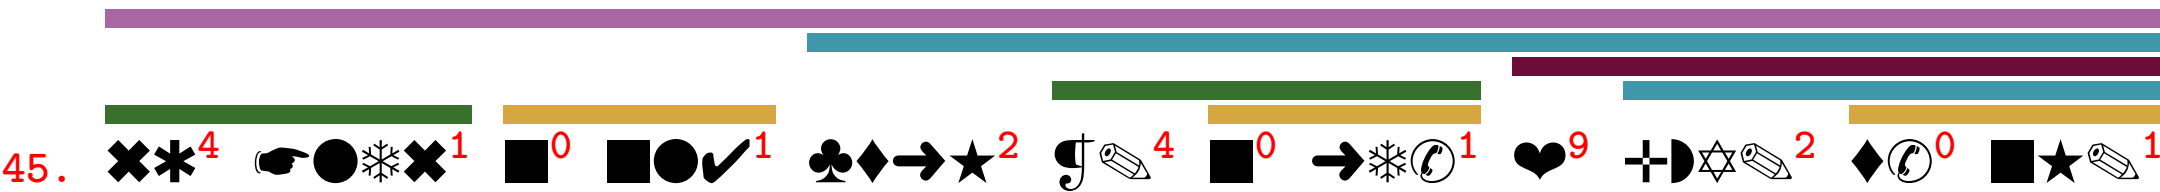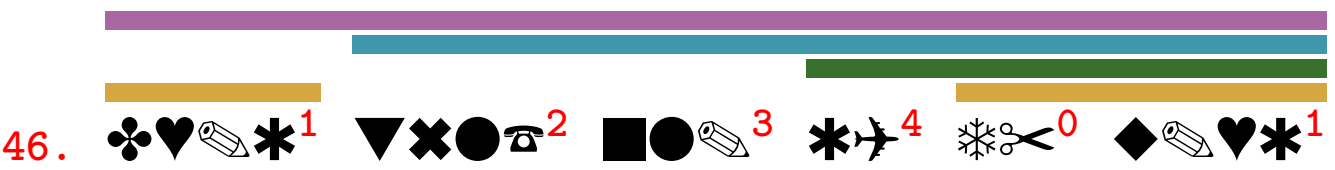



57. ♣♥✎✱<sup>1</sup> †♥♦<sup>5</sup> ✱▼✓†<sup>2</sup> ❄️✂️<sup>0</sup> ☎️➡️★✱<sup>1</sup>

58. †<sup>7</sup> ➡️☞✿<sup>2</sup> ❄️✂️<sup>0</sup> ♦♠✈️<sup>1</sup> ♥<sup>4</sup> ❄️✂️<sup>0</sup> 🕒➡️†♣<sup>1</sup>

59. ❄️✂️<sup>0</sup> ☎️➡️★✱<sup>1</sup> +▲♣■<sup>3</sup> ☎️★♥<sup>2</sup> ♥<sup>4</sup> ♣♥✎✱<sup>1</sup> ✕♥☞<sup>0</sup> ➡️✂️✕<sup>1</sup> ☎️♦♦♦❄️<sup>3</sup>

60. ♣♥✎✱<sup>1</sup> †♥♦<sup>5</sup> ☎️▲🕒✿<sup>2</sup> ❄️★☆<sup>9</sup> ❄️✂️<sup>0</sup> ➡️✂️✕<sup>1</sup> +▲✧<sup>2</sup> ☎️♦♦♦❄️<sup>3</sup>

61. ❄️✂️<sup>8</sup> +➡️▼<sup>2</sup>

62. †<sup>7</sup> ♣▼♥<sup>2</sup> ♦▼†✧<sup>5</sup> ✱✈️<sup>4</sup> ▲✱<sup>0</sup> ☞✎♥<sup>1</sup> ➡️♠†♦♥<sup>3</sup>
