# Supplementary material
Source: ML conference proceedings conference paper supplement (https://aclanthology.org/2021.teachingnlp-1.7)
Supplement: OptionalSupplementaryMaterial [file Biancaneve_it_letters_cards_activity_1.odd.pdf › materials/tmp/Biancaneve_it_letters_cards_activity_1.odd.pdf]

*un*



*riconobbe*



*nostra*



*lo*



*rispose*



*un*



*nano*



*non*



*la*



*lo*



*disse*



*la*



*lo*



*disse*



*biancaneve*



*specchio*



*a*



*re*



*giorno*



*nani*



*a*



*vecchia*
