# Supplementary material
Source: ML conference proceedings conference paper supplement (https://aclanthology.org/2021.teachingnlp-1.7)
Supplement: OptionalSupplementaryMaterial [file Biancaneve_it_letters_cards_activity_1.pdf › materials/out/Biancaneve_it_letters_cards_activity_1.pdf]

*nano*

*un*

*la*

*riconobbe*

tmo

emacs

kapase

pry

*casina*

*nostra*

*specchio*

*lo*

yramy

lmera

kar

lpovry

*a*

*rispose*

*altro*

*un*

cyket

el

tmo

sakov

*biancaneve*

*nano*

*riconobbe*

*non*

emac

erpalam

evyr

kapase



*casina*

*la*

*specchio*

*lo*

pry

lmera

kar

lpovry

*a*

*disse*

*vecchia*

*la*

erces

el

pry

ryras

*specchio*

*lo*

*a*

*disse*

kar

lpovry

erces

el

*lo*

*biancaneve*

*disse*

*specchio*

erpalam

kar

lpovry

erces



*il*

*a*

*quel*

*re*

el

rly

ysO

ecyv

*i*

*giorno*

*chiesero*

*nani*

ykrec

ta

meka

klocet

*la*

*a*

*pidocchio*

*vecchia*

el

pry

ryras

orroke
