# Supplementary material
Source: ML conference proceedings conference paper supplement (https://aclanthology.org/2021.teachingnlp-1.7)
Supplement: OptionalSupplementaryMaterial [file Biancaneve_it_letters_cards_activity_1.shuf.pdf › materials/tmp/Biancaneve_it_letters_cards_activity_1.shuf.pdf]

*nano*

*un*

*la*

*riconobbe*

*casina*

*nostra*

*specchio*

*lo*



*a*

*rispose*

*altro*

*un*

*biancaneve*

*nano*

*riconobbe*

*non*



*casina*

*la*

*specchio*

*lo*

*a*

*disse*

*vecchia*

*la*



*specchio*

*lo*

*a*

*disse*

*lo*

*biancaneve*

*disse*

*specchio*



*il*

*a*

*quel*

*re*

*i*

*giorno*

*chiesero*

*nani*



*la*

*a*

*pidocchio*

*vecchia*
