# Supplementary material
Source: ML conference proceedings conference paper supplement (https://aclanthology.org/2021.teachingnlp-1.7)
Supplement: OptionalSupplementaryMaterial [file Biancaneve_it_letters_cards_activity_1_t-2x2.pdf › materials/tmp/Biancaneve_it_letters_cards_activity_1_t-2x2.pdf]

tmo

emac

kapase

pry

yramy

lmera

kar

lpovry

cyket

el

tmo

sakov

emac

erpalam

evyr

kapase

pry

lmera

kar

lpovry

erces

el

pry

ryras

kar

lpovry

erces

el

erpalam

kar

lpovry

erces



el

rly

ysO

ecyv

ykrec

ta

meka

klocet

el

pry

ryras

orroke
