# Supplementary material
Source: ML conference proceedings conference paper supplement (https://aclanthology.org/2021.teachingnlp-1.7)
Supplement: OptionalSupplementaryMaterial [file Biancaneve_it_letters_cards_activity_1_t.pdf › materials/tmp/Biancaneve_it_letters_cards_activity_1_t.pdf]

tmo

emacs

kapase

pry

yr amy

Imera

kar

lpovry



cyket

e1

tmo

sakov

emacs

erpalam

evyr

kapase



pry

Imera

kar

lpovry

erces

e1

pry

ryras



kar

lpovry

erces

e1

erpalam

kar

lpovry

erces



e1

rl $y$

*yso*

ecyv

ykrec

ta

meka

klocet



e1

pry

ryras

orroke
