# Supplementary material
Source: ML conference proceedings conference paper supplement (https://aclanthology.org/2021.teachingnlp-1.7)
Supplement: OptionalSupplementaryMaterial [file Biancaneve_it_letters_cards_activity_2.even.pdf › materials/tmp/Biancaneve_it_letters_cards_activity_2.even.pdf]

*il*

R

*il*

R

*lo*

R

*la*

R

*la*

R

*i*

R

*un*

R

*un*

R



*uno*

R

*uno*

R

*una*

R

*una*

R

*quel*

D

*questo*

D

*ogni*

D

*e*

*c*



*e*

*c*

*ma*

C

*in*

E

*a*

E

*di*

E

*con*

E

*lei*

P

*lui*

P



*chi*

P

*non*

B

*donna*

S

*biancaneve*

S

*specchio*

S

*principe*

S

*pomeriggio*

S

*bottiglia*

S



*gentilezza*

S

*piscina*

S

*Lampada*

S

*sedano*

S

*bicicletta*

S

*rispose*

V

*diede*

V

*disse*

*V*



*riconobbe*

*V*

*comprò*

V

*dormiva*

V

*alleggra*

A

*triste*

A

*di*

Z

*che*

Z

*per*

Z
