# Supplementary material
Source: ML conference proceedings conference paper supplement (https://aclanthology.org/2021.teachingnlp-1.7)
Supplement: OptionalSupplementaryMaterial [file Biancaneve_it_letters_cards_activity_2.pdf › materials/out/Biancaneve_it_letters_cards_activity_2.pdf]

$il$

R

$il$

R

$il$

R

$il$

R

rly

0

rly

0

rly

0

rly

0

$l o$

R

$l a$

R

$l o$

R

$l a$

R

kar

0

pry

0

kar

0

pry

0

$la$

R

$i$

R

$la$

R

$i$

R

pry

0

ta

0

pry

0

ta

0

*un*

R

*un*

R

*un*

R

*un*

R

tmo

0

tmo

0

tmo

0

tmo

0



*uno*

R

*uno*

R

*uno*

R

*uno*

R

alice

0

alice

0

alice

0

alice

0

*una*

R

*una*

R

*una*

R

*una*

R

1emo

0

1emo

0

1emo

0

1emo

0

*quel*

D

*quel*

D

*questo*

D

*questo*

D

ecyv

6

ecyv

6

aryta

6

aryta

6

*ogni*

D

*e*

C

*ogni*

D

*e*

C

lmas

6

av

7

lmas

6

av

7



*e*  
C

*e*  
C

*ma*  
C

*ma*  
C

av

7

av

7

cem

7

cem

7

*in*

E

*in*

E

*a*

E

*a*

E

vro

4

vro

4

el

4

el

4

*di*

E

*di*

E

*con*

E

*con*

E

kre

4

kre

4

klyc

4

klyc

4

*lei*

P

*lei*

P

*lui*

P

*lui*

P

seto

8

seto

8

cesa

8

cesa

8



*chi*

P

*chi*

P

*non*

B

*non*

B

pata

8

pata

8

evyr

5

evyr

5

*donna*

S

*nani*

S

*biancaneve*

S

*bambina*

S

meka

1

tmove

1

evryv

1

erpalam

1

*specchio*

S

*regina*

S

*principe*

S

*re*

S

atyky

1

lpovry

1

yso

1

vrapery

1

*pomeriggio*

S

*albergo*

S

*bottiglia*

S

*sera*

S

sesys

1

mtylava

1

cete

1

ycylvt

1



*gentilezza*

S

*banana*

S

*piscina*

S

*bosco*

S

ytyry

1

ycselep

1

arrav

1

epret

1

*lampada*

S

*finestra*

S

*sedano*

S

*ragno*

S

askasa

1

aklos

1

smyso

1

rapla

1

*bicicletta*

S

*volpe*

S

*rispose*

V

*foresta*

S

cecys

1

asmomyr

1

acram

1

cyket

2

*diede*

V

*era*

V

*disse*

V

*si svegliò*

V

tmel

2

smely

2

atlopar

2

erces

2



*riconobbe*

V

*spezzò*

V

*comprò*

V

*correva*

V

omyva

2

kapase

2

tecer

2

ekral

2

*dormiva*

V

*mangiava*

V

*allegra*

A

*allegro*

A

plespe

2

ystem

2

parcy

3

omaka

3

*triste*

A

*felice*

A

*di*

Z

*di*

Z

sevlo

3

eposy

3

kre

9

kre

9

*che*

Z

*che*

Z

*per*

Z

*per*

Z

lper  
9

lper  
9

opro  
9

opro  
9
