# Supplementary material
Source: ML conference proceedings conference paper supplement (https://aclanthology.org/2021.teachingnlp-1.7)
Supplement: OptionalSupplementaryMaterial [file Biancaneve_it_letters_cards_activity_2.shuf.pdf › materials/tmp/Biancaneve_it_letters_cards_activity_2.shuf.pdf]

*il*

R

*il*

R

*il*

R

*il*

R

*lo*

R

*lo*

R

*la*

R

*la*

R

*la*

R

*la*

R

*i*

R

*i*

R

*un*

R

*un*

R

*un*

R

*un*

R

*uno*

R

*uno*

R

*uno*

R

*uno*

R

*una*

R

*una*

R

*una*

R

*una*

R

*quel*

D

*quel*

D

*questo*

D

*questo*

D

*ogni*

D

*ogni*

D

*e*

*c*

*e*

*c*

*e*

*c*

*e*

*c*

*ma*

C

*ma*

C

*in*

E

*in*

E

*a*

E

*a*

E

*di*

E

*di*

E

*con*

E

*con*

E

*lei*

P

*lei*

P

*lui*

P

*lui*

P

*chi*

P

*chi*

P

*non*

B

*non*

B

*donna*

S

*nani*

S

*biancaneve*

S

*bambina*

S

*specchio*

S

*regina*

S

*principe*

S

*re*

*S*

*pomeriggio*

S

*albergo*

S

*bottiglia*

S

*sera*

S

*gentilezza*

S

*b a n a n a*

S

*piscina*

S

*bosco*

*S*

*Lampada*

S

*finestra*

S

*sedano*

S

*ragno*

S

*bicicletta*

S

*volpe*

S

*rispose*

V

*foresta*

S

*diede*

V

*era*

*V*

*disse*

*V*

*si sveglia*

*V*

*riconobbe*

*V*

*spezzò*

*V*

*comprò*

V

*correva*

V

*dormiva*

V

*mangia va*

V

*allegra*

A

*allegro*

A

*triste*

A

*felice*

A

*di*

Z

*di*

Z

*che*

Z

*che*

Z

*per*

Z

*per*

Z
