# Supplementary material
Source: ML conference proceedings conference paper supplement (https://aclanthology.org/2021.teachingnlp-1.7)
Supplement: OptionalSupplementaryMaterial [file Biancaneve_it_letters_cards_activity_2_t-2x2.pdf › materials/tmp/Biancaneve_it_letters_cards_activity_2_t-2x2.pdf]

rly

0

rly

0

rly

0

rly

0

kar

0

pry

0

kar

0

pry

0

pry

0

ta

0

pry

0

ta

0

tmo

0

tmo

0

tmo

0

tmo

0

alice

0

alice

0

alice

0

alice

0

1emo

0

1emo

0

1emo

0

1emo

0

ecyv

6

ecyv

6

aryta

6

aryta

6

lmas

6

av

7

lmas

6

av

7

av

7

av

7

cem

7

cem

7

vro

4

el

4

vro

4

el

4

kre

4

kre

4

kl yc

4

kl yc

4

seto

8

seto

8

cesa

8

cesa

8

pata

8

pata

8

evyr

5

evyr

5

meka

1

tmove

1

evryv

1

erpalam

1

atyky

1

lpovry

1

yso

1

vraper

1

sesys

1

mtylava

1

cete

1

ycylvt

1

ytyry

1

ycselep

1

arrav

1

epret

1

askasa

1

aklos

1

smyso

1

rapla

1

cecys

1

asmomyr

1

acram

1

cyket

2

tmel

2

smely

2

atlopar

2

erces

2

omyva

2

kapase

2

tecer

2

ekral

2

plespe

2

ystem

2

parcy

3

omaka

3

sevlo

3

eposy

3

kre

9

kre

9

lper  
9

lper  
9

opro  
9

opro  
9
