# Supplementary material
Source: ML conference proceedings conference paper supplement (https://aclanthology.org/2021.teachingnlp-1.7)
Supplement: OptionalSupplementaryMaterial [file Biancaneve_it_letters_cards_activity_2_t.pdf › materials/tmp/Biancaneve_it_letters_cards_activity_2_t.pdf]

rl<sub>y</sub>

0

rl<sub>y</sub>

0

rl<sub>y</sub>

0

rl<sub>y</sub>

0

kar

0

kar

0

pry

0

pry

0

pry

0

pry

0

ta

0

ta

0

tmo

0

tmo

0

tmo

0

tmo

0

alice

0

alice

0

alice

0

alice

0

1emo

0

1emo

0

1emo

0

1emo

0

*ecyv*

6

*ecyv*

6

aryta

6

aryta

6

1mas

6

1mas

6

av

7

av

7

av

7

av

7

cem

7

cem

7

vro

4

vro

4

e1

4

e1

4

kre

4

kre

4

kl<sub>y</sub>c

4

kl<sub>y</sub>c

4

seto

8

seto

8

cesa

8

cesa

8

pata

8

pata

8

evyr

5

evyr

5

me $\kappa$ a

1

tmove

1

evryv

1

erpalam

1

atyky

1

lpovry

1

$y_{SO}$

1

vraper

1

sesys

1

mtylava

1

cete

1

*ycyl*yt

1

*ytyry*

1

ycselep

1

array

1

epr et

1

askasa

1

aklos

1

smyso

1

rapla

1

cecys

1

asmomyr

1

acram

1

cyket

2

tme1

2

smelly

2

at1opar

2

erces

2

omyva

2

kapase

2

tecer

2

ekra1

2

plespe

2

ystem

2

parcy

3

omaka

3

sev10

3

eposy

3

kre

9

kre

9

1per

9

1per

9

opro

9

opro

9
