# Supplementary material
Source: ML conference proceedings conference paper supplement (https://aclanthology.org/2021.teachingnlp-1.7)
Supplement: OptionalSupplementaryMaterial [file Biancaneve_it_letters_dict.pdf › materials/out/Biancaneve_it_letters_dict.pdf]

=== WORD DICTIONARY  
===

acram foresta  
acsasy minuscola  
aklopa tornarono  
aklos lampada  
akyky diceva  
alamy padroni  
alce uno  
alyk sei  
ampake guardava  
apalo lettino  
arrav bosco  
aryta questo  
askasa finestra  
asmomyr bicicletta  
atlopar si svegliò  
atly suo  
atme andò  
atyky regina  
av e  
avamyr ha preso  
avle neve  
avro oro  
cecys volpe  
celapo piattini  
cem ma  
cesa lui  
cesevlot era  
apparecchiato  
cete sera  
clyce notte  
cry da

cryk dopo  
csacyce profondissimo  
csycyt tavolino  
cyket rispose  
cytyc arrivò  
ecyte morte  
ecyv quel  
ekral comprò  
ekre mio  
el a  
elvymas era entrato  
emac nano  
epas come  
epomemy cacciatore  
eposy triste  
epret piscina  
erces disse  
erpalam biancaneve  
esvylyt forchettina  
etlol cercare  
evlerar travestita  
evryv bambina  
evyr non  
kakla senza  
kapase riconobbe  
kar lo  
kev tu  
keves accettò  
klatme coltelli  
klocet chiesero  
klyc con  
kove vide  
kre di

krora cuciva  
krylka giornata  
kycytel bicchierini  
lav io  
lavra gelosa  
lcyka stessa  
lcysky ha usato  
lekelov era  
ricoperto  
lelor quando  
lemo una  
lesky qualche  
lkol cosa  
lmas ogni  
lmera casina  
lokes inganno  
lper che  
lpovry specchio  
lvopel andavano  
lvosyc rimaneva  
lvyly rivali  
lykop panino  
lylyv entrò  
meka nani  
mekoty ucciderò  
mocry piccola  
motymy ti chiami  
mpop hai  
mtaply piattino  
mteceka rispondeva  
mtylava pomeriggio  
mysavo mi chiamo  
ocecym qualcuno

ocys del  
okalo tempo  
oklyl pezzo  
okytyk castello  
omaka allegra  
omale sapeva  
omapa morse  
omyva spezzò  
opako durante  
oplos offrì  
opro per  
orce casa  
orroke pidocchio  
orvyro tovaglia  
osomo sette  
otaly ragazza  
otmos bianca  
pa è  
pamotet cucchiaino  
parcy allegro  
pata chi  
plespe mangiava  
plomte riposare  
plopo intanto  
plorte rimanere  
pocle nevosa  
provyte si accorsero  
pry la  
pryma subito  
rapla sedano  
remetes avvelenata  
reram cadde  
rly il

rmyc mia  
rryty monti  
ryras vecchia  
sakov altro  
saspo riuscì  
sesys albergo  
seto lei  
sevlo felice  
smely diede  
smylky possedeva  
smyso ragno  
spopa ordinò  
sposo candida  
sto su  
syko sola  
syroma uccidere  
syspe bimba  
ta i  
tecer correva  
tepro strega  
tmel era  
tmempa forchette  
tmo un  
tmocro scappare  
tmove donna  
tym le  
tyrvy scese  
tyvla porta  
vasa mela  
velap voleva  
vevov sposò  
vlematy chiamarono  
vloty allora

vlysy mattino  
vocla sonno  
vokoram estraevano  
vompe aveva  
vosose chiedeva  
vraper principe  
vro in  
vrom capì  
ycselep gentilezza  
ycsyc bella  
ycy l'  
ycylyt bottiglia  
ykle aprì  
ykocho chiese  
ykrec giorno  
ykyc ebbe  
ylcycy ci erano  
ympesym si addormentò  
ymtykyt sei arrivata  
yramy nostra  
yrlyc erano  
ysem loro  
yso re  
ystem dormiva  
ytosavo si travestì  
ytyry banana  
=== POS DICTIONARY  
===  
A 3  
B 5  
C 7  
D 6  
E 4

|   |   |
|---|---|
| P | 8 |
| R | 0 |
| S | 1 |
| V | 2 |
| Z | 9 |
