# Supplementary material
Source: ML conference proceedings conference paper supplement (https://aclanthology.org/2021.teachingnlp-1.7)
Supplement: OptionalSupplementaryMaterial [file Biancaneve_it_letters_translated.pdf › materials/out/Biancaneve_it_letters_translated.pdf]

1. opako<sup>4</sup> lemo<sup>0</sup> krylka<sup>1</sup> pocle<sup>3</sup> lemo<sup>0</sup> atyky<sup>1</sup> krora<sup>2</sup> el<sup>4</sup> lemo<sup>0</sup> askasa<sup>1</sup>
2. cryk<sup>4</sup> lesky<sup>6</sup> okalo<sup>1</sup> pry<sup>0</sup> atyky<sup>1</sup> ykyc<sup>2</sup> lemo<sup>0</sup> syspe<sup>1</sup> otmos<sup>3</sup> epas<sup>4</sup> pry<sup>0</sup> avle<sup>1</sup>
3. opro<sup>4</sup> aryta<sup>8</sup> vlematy<sup>2</sup> pry<sup>0</sup> evryv<sup>1</sup> erpalam<sup>1</sup>
4. cryk<sup>4</sup> pry<sup>0</sup> ecyte<sup>1</sup> kre<sup>4</sup> pry<sup>0</sup> atyky<sup>1</sup> rly<sup>0</sup> yso<sup>1</sup> vevov<sup>2</sup> lemo<sup>0</sup> tmove<sup>1</sup> ycsyc<sup>3</sup>
5. pry<sup>0</sup> tmove<sup>1</sup> smylky<sup>2</sup> alce<sup>0</sup> lpovry<sup>1</sup>
6. lelor<sup>7</sup> ampake<sup>2</sup> vro<sup>4</sup> kar<sup>0</sup> lpovry<sup>1</sup>
7. akyky<sup>2</sup>
8. pata<sup>8</sup> pa<sup>2</sup> ycsyc<sup>3</sup> kakla<sup>4</sup> lvyly<sup>1</sup> vro<sup>4</sup> aryta<sup>6</sup> okytyk<sup>1</sup>
9. kar<sup>0</sup> lpovry<sup>1</sup> mteceka<sup>2</sup> el<sup>4</sup> pry<sup>0</sup> atyky<sup>1</sup>

10. kev<sup>8</sup> alyk<sup>2</sup> ycsyc<sup>3</sup> kakla<sup>4</sup> lvyly<sup>1</sup> atyky<sup>1</sup>

11. cryk<sup>4</sup> lesky<sup>6</sup> okalo<sup>1</sup> pry<sup>0</sup> atyky<sup>1</sup> ykoko<sup>2</sup> el<sup>4</sup> kar<sup>0</sup> lpovry<sup>1</sup>

12. pata<sup>8</sup> pa<sup>2</sup> ycsyc<sup>3</sup> kakla<sup>4</sup> lvyly<sup>1</sup> vro<sup>4</sup> aryta<sup>6</sup> okytyk<sup>1</sup>

13. kar<sup>0</sup> lpovry<sup>1</sup> cyket<sup>2</sup> el<sup>4</sup> pry<sup>0</sup> atyky<sup>1</sup>

14. erpalam<sup>1</sup> pa<sup>2</sup> ycsyc<sup>3</sup> kakla<sup>4</sup> lvyly<sup>1</sup> vro<sup>4</sup> aryta<sup>6</sup> okytyk<sup>1</sup>

15. pry<sup>0</sup> atyky<sup>1</sup> lavra<sup>3</sup> spopa<sup>2</sup> el<sup>4</sup> tmo<sup>0</sup> epomemy<sup>1</sup> kre<sup>9</sup> syroma<sup>2</sup> erpalam<sup>1</sup>

16. cem<sup>7</sup> pry<sup>0</sup> otaly<sup>1</sup> saspo<sup>2</sup> el<sup>9</sup> tmocro<sup>2</sup> vro<sup>4</sup> rly<sup>0</sup> arrav<sup>1</sup>

17. lelor<sup>7</sup> cytyc<sup>2</sup> pry<sup>0</sup> cete<sup>1</sup>

18. erpalam<sup>1</sup> kove<sup>2</sup> lemo<sup>0</sup> mocry<sup>3</sup> orce<sup>1</sup>

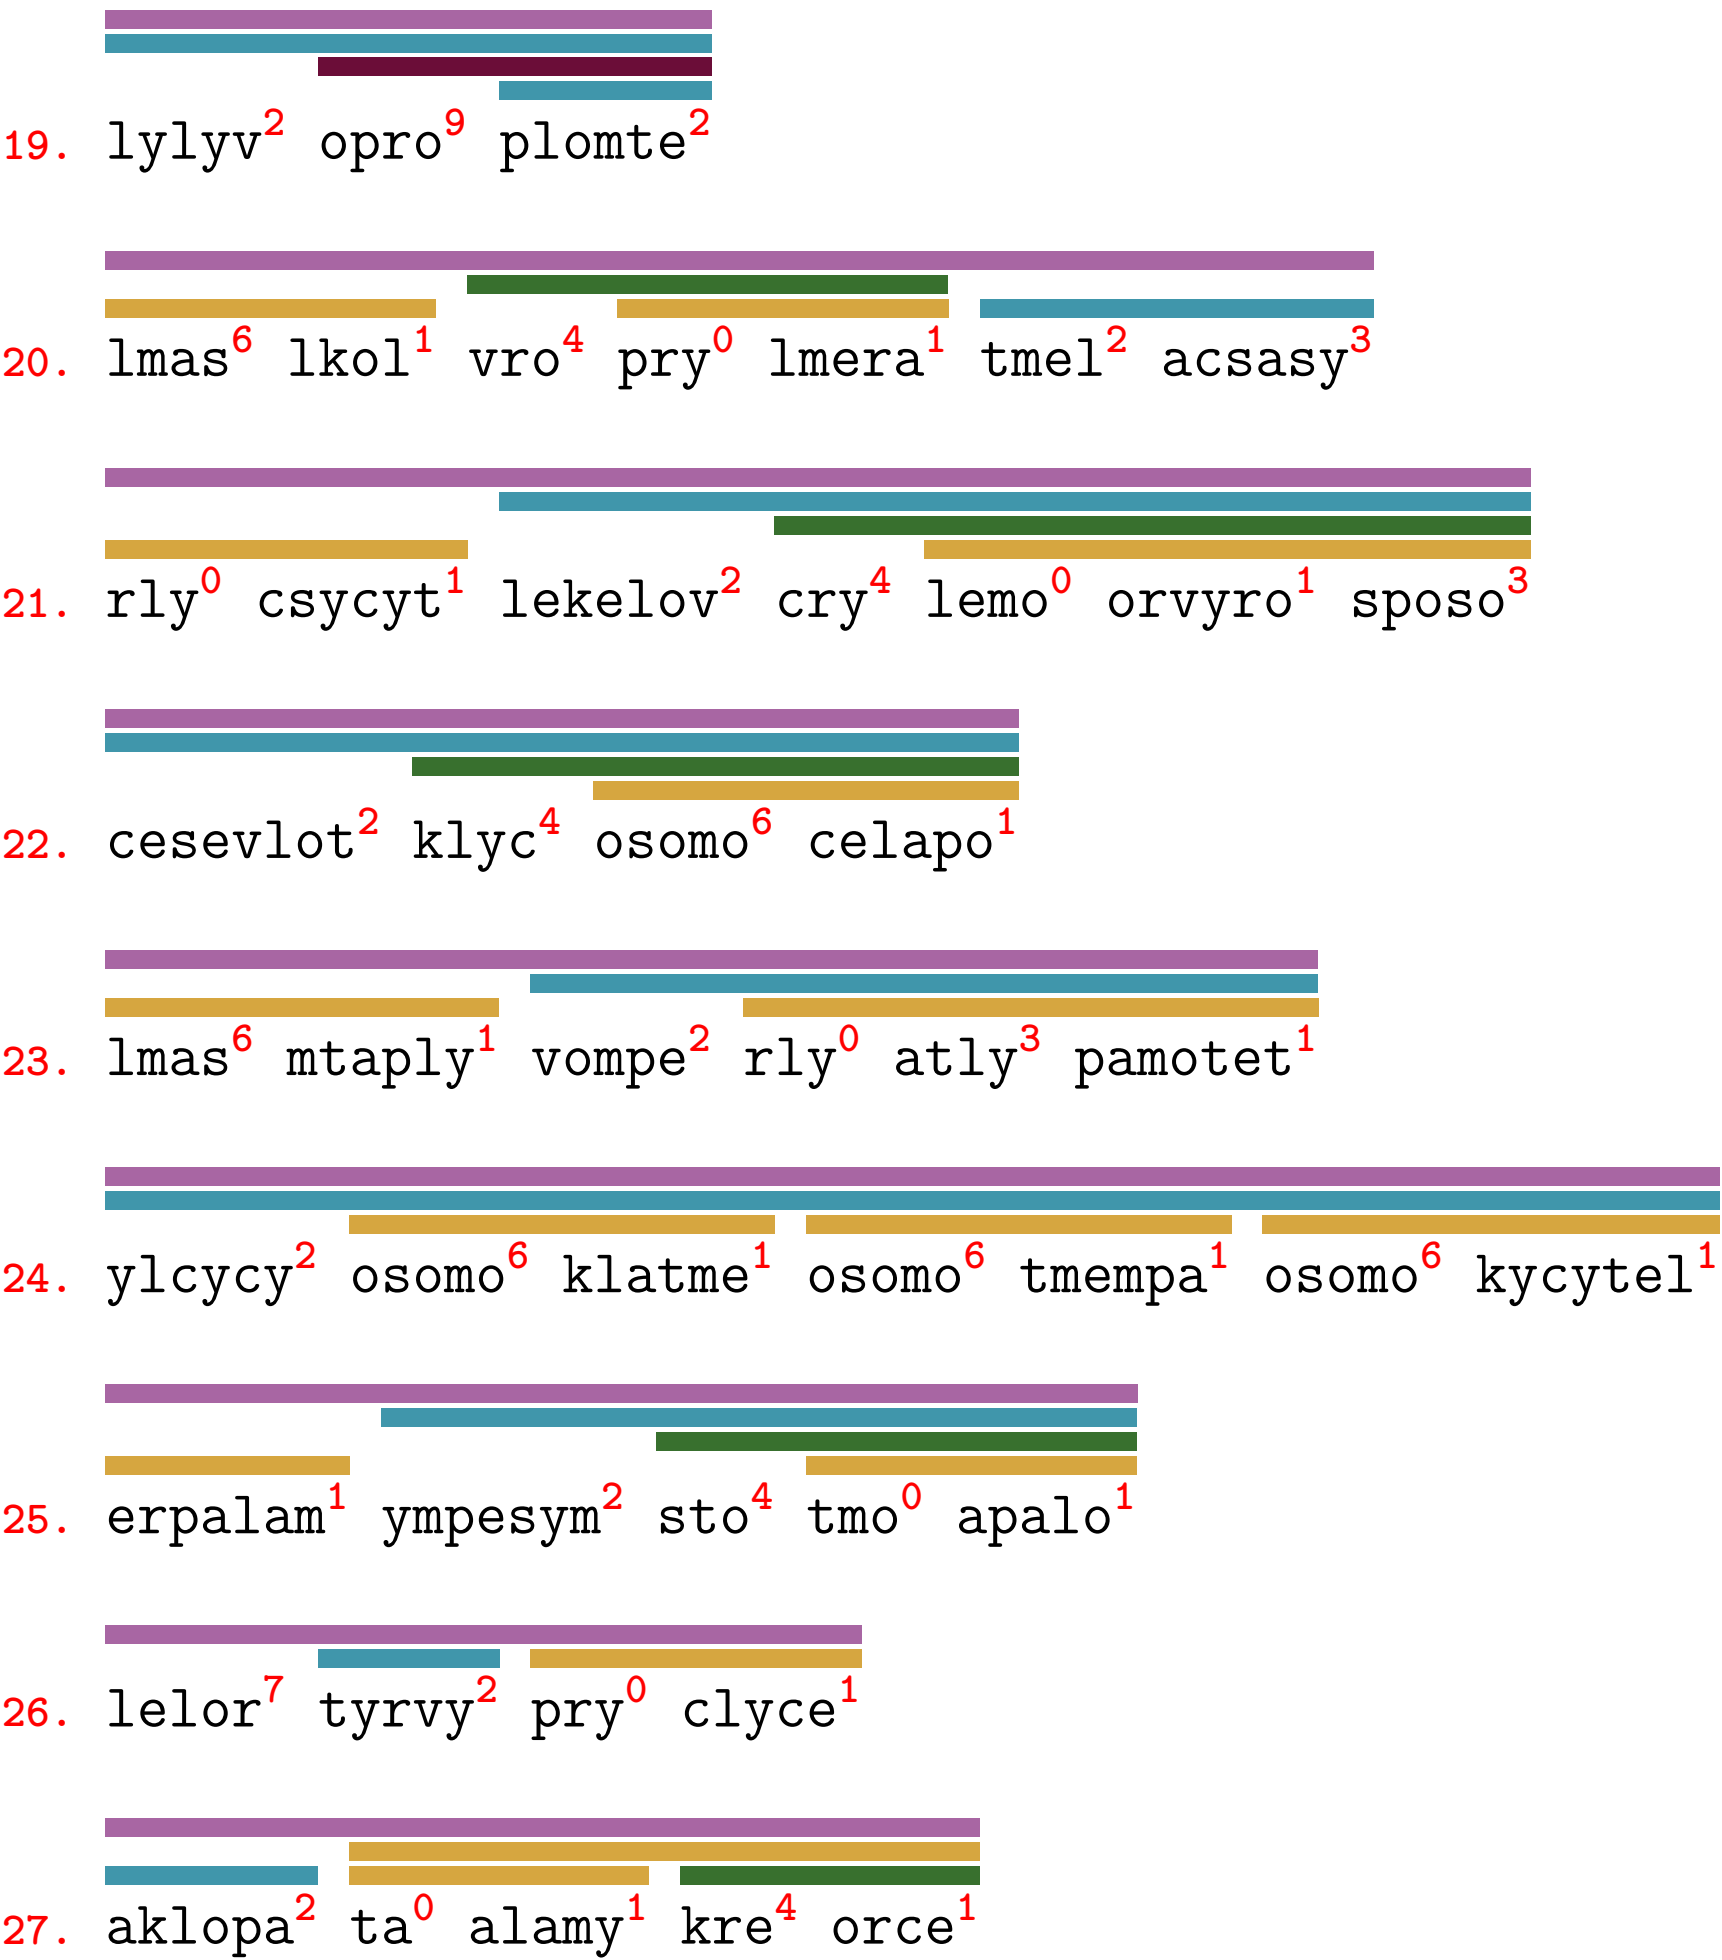

28. yrlyc<sup>2</sup> meka<sup>1</sup> lper<sup>9</sup> vokoram<sup>2</sup> ycy<sup>0</sup> avro<sup>1</sup> cry<sup>4</sup> ta<sup>0</sup> rryty<sup>1</sup>

29. ta<sup>0</sup> meka<sup>1</sup> provyte<sup>2</sup> lper<sup>9</sup> elvymas<sup>2</sup> ocecym<sup>8</sup>

30. tmo<sup>0</sup> emac<sup>1</sup> ykoko<sup>2</sup>

31. pata<sup>8</sup> avamyr<sup>2</sup> tmo<sup>0</sup> oklyl<sup>1</sup> kre<sup>4</sup> rly<sup>0</sup> ekre<sup>6</sup> lykop<sup>1</sup>

32. tmo<sup>0</sup> sakov<sup>3</sup> emac<sup>1</sup> erces<sup>2</sup>

33. pata<sup>8</sup> lcysky<sup>2</sup> pry<sup>0</sup> rmyc<sup>3</sup> esvylyt<sup>1</sup>

34. el<sup>4</sup> rly<sup>0</sup> vlysy<sup>1</sup> erpalam<sup>1</sup> atlopar<sup>2</sup>

35. ta<sup>0</sup> meka<sup>1</sup> klocet<sup>2</sup> el<sup>4</sup> erpalam<sup>1</sup> klyc<sup>4</sup> ycselep<sup>1</sup>

36. epas<sup>5</sup> motymy<sup>2</sup>

37. mysavo<sup>2</sup> erpalam<sup>1</sup>

38. erpalam<sup>1</sup> cyket<sup>2</sup> el<sup>4</sup> ta<sup>0</sup> meka<sup>1</sup>

39. epas<sup>5</sup> ymtykyt<sup>2</sup> vro<sup>4</sup> pry<sup>0</sup> yramy<sup>6</sup> lmera<sup>1</sup>

40. tym<sup>8</sup> klocet<sup>2</sup> ta<sup>0</sup> meka<sup>1</sup>

41. erpalam<sup>1</sup> cyket<sup>2</sup> lper<sup>9</sup> pry<sup>0</sup> atyky<sup>1</sup> pry<sup>8</sup> velap<sup>2</sup> syroma<sup>2</sup>

42. cem<sup>7</sup> seto<sup>8</sup> saspo<sup>2</sup> el<sup>9</sup> tmocro<sup>2</sup> cry<sup>4</sup> ta<sup>0</sup> meka<sup>1</sup>

43. alce<sup>8</sup> kre<sup>4</sup> ta<sup>0</sup> meka<sup>1</sup> ykoko<sup>2</sup> el<sup>4</sup> erpalam<sup>1</sup> kre<sup>9</sup> plorte<sup>2</sup> klyc<sup>4</sup> ysem<sup>8</sup> vro<sup>4</sup> pry<sup>0</sup> lmera<sup>1</sup>

44. erpalam<sup>1</sup> keves<sup>2</sup> sevlo<sup>3</sup>

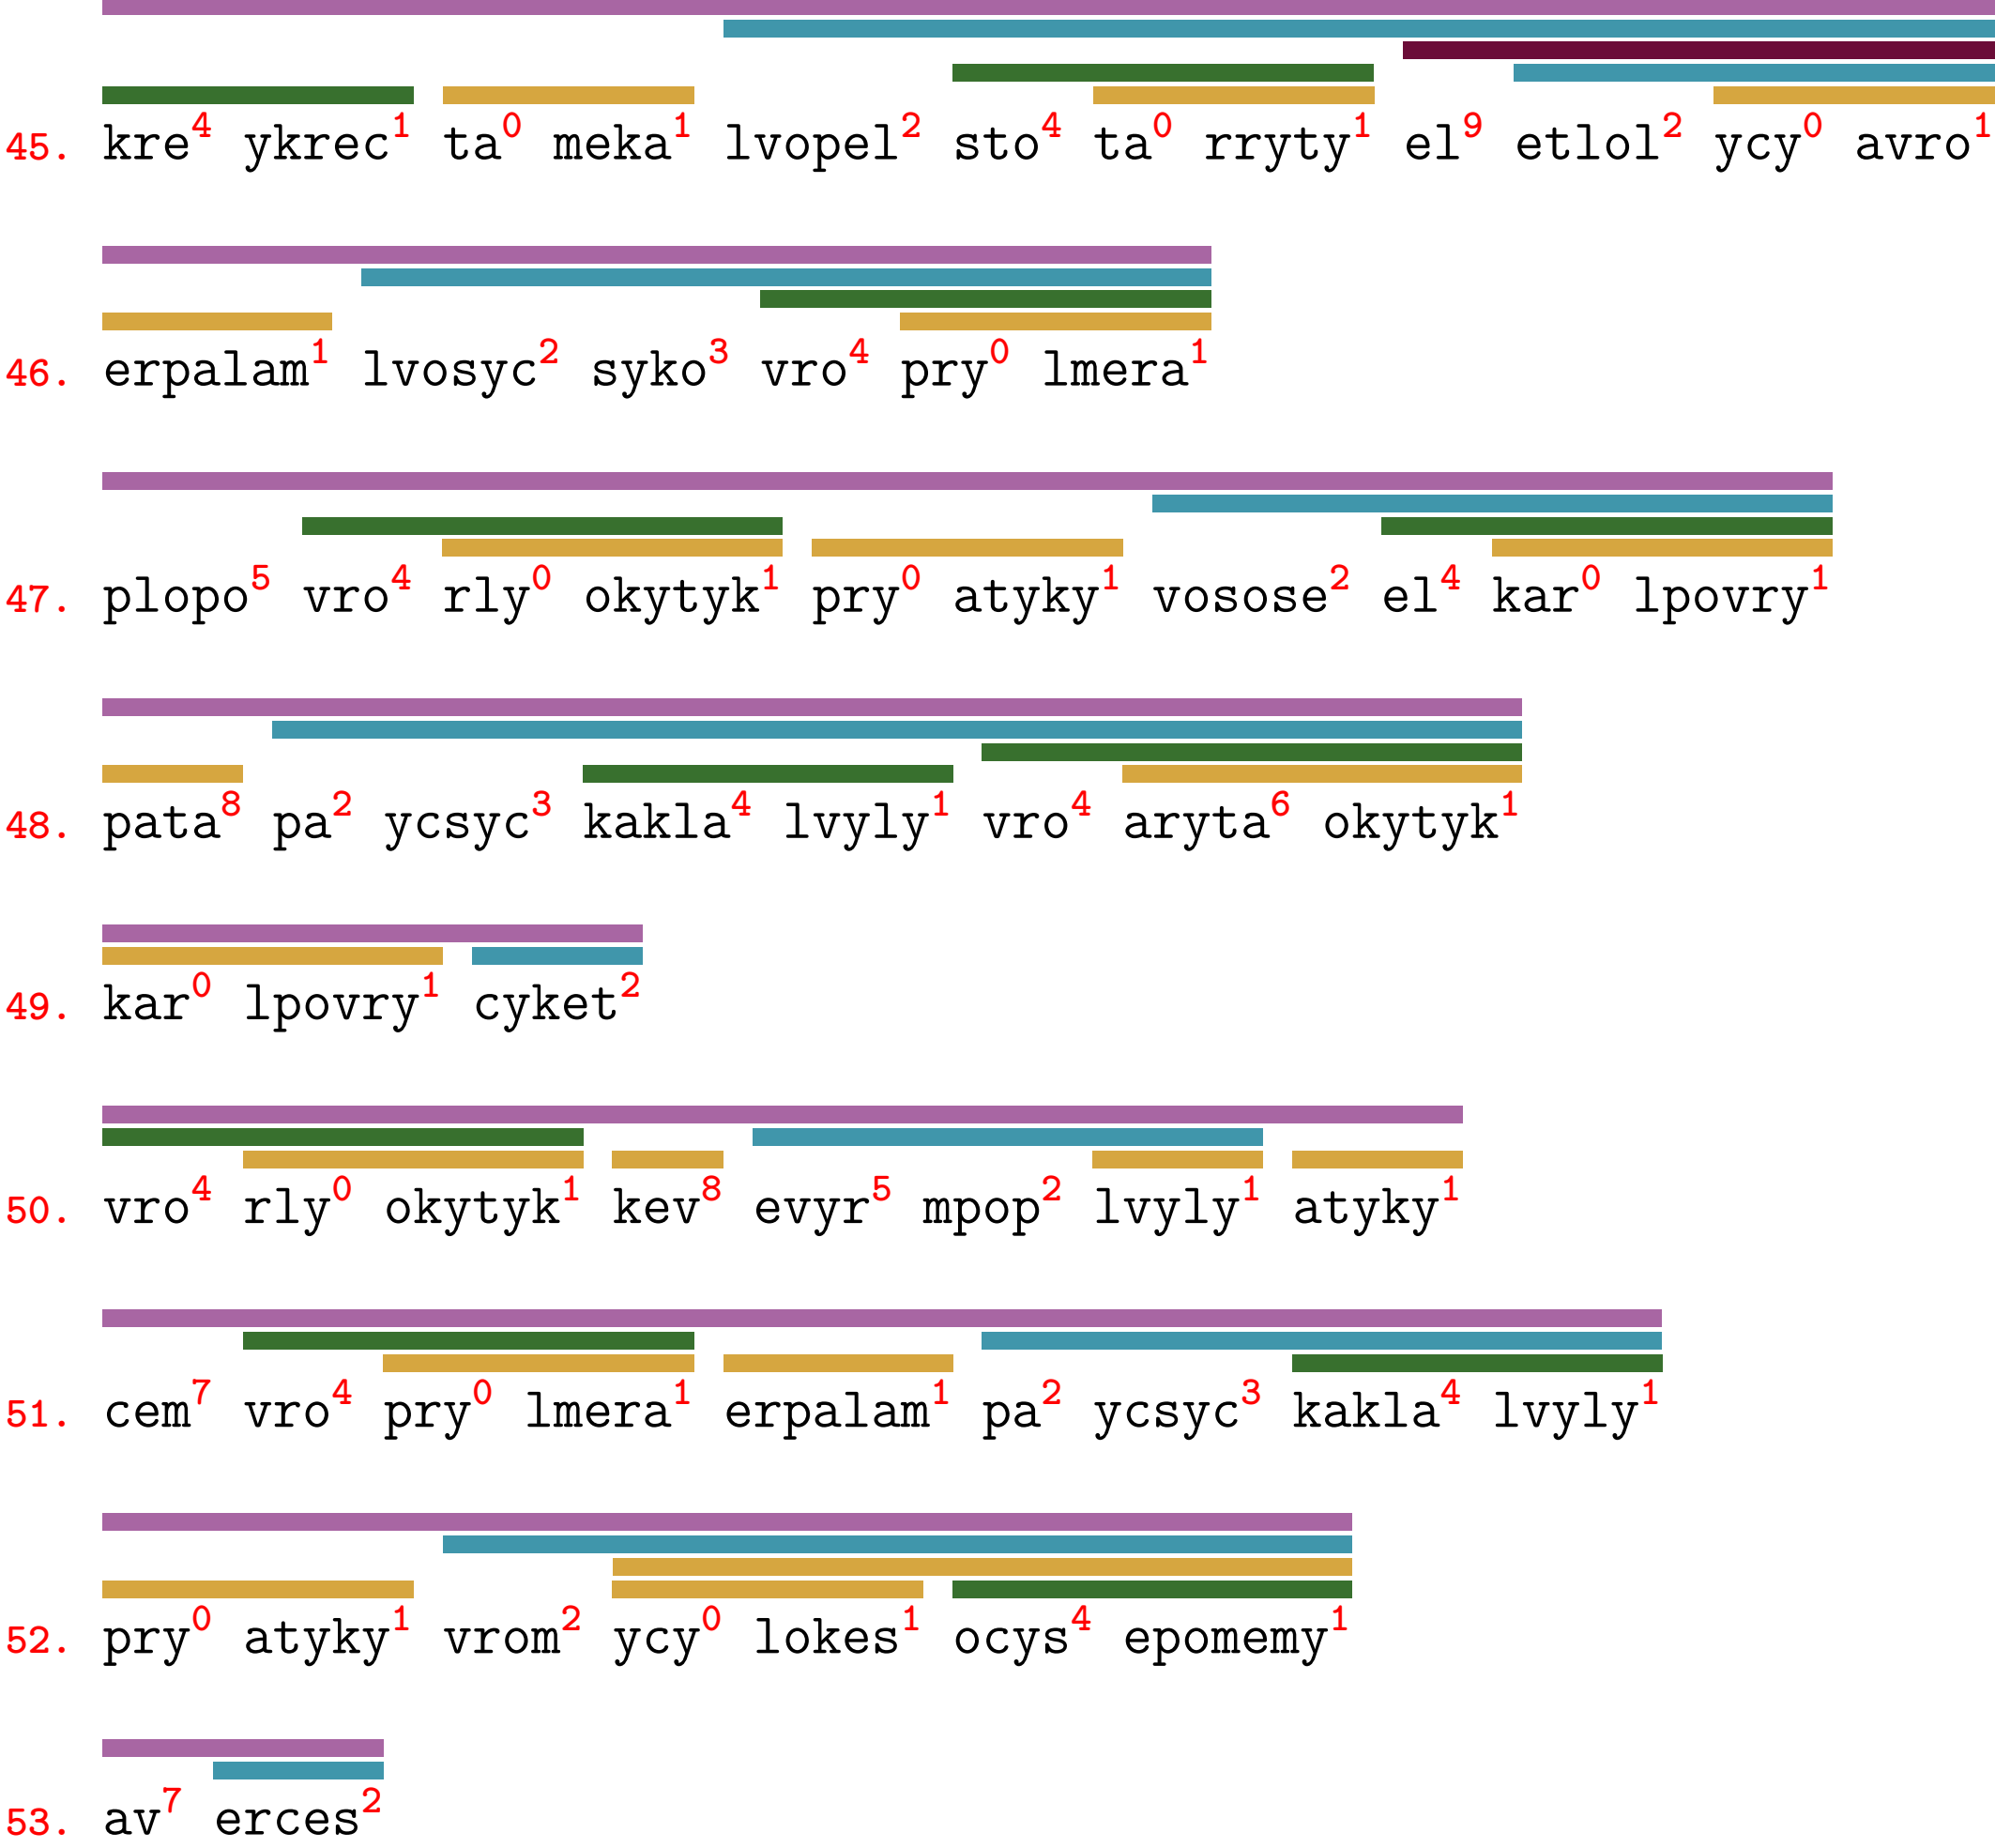

54. vloty<sup>5</sup> mekoty<sup>2</sup> erpalam<sup>1</sup> lav<sup>8</sup> lcyka<sup>3</sup>

55. ytosavo<sup>2</sup> cry<sup>4</sup> ryras<sup>3</sup> tepro<sup>1</sup>

56. atme<sup>2</sup> el<sup>4</sup> pry<sup>0</sup> orce<sup>1</sup> kre<sup>4</sup> ta<sup>0</sup> osomo<sup>3</sup> meka<sup>1</sup>

57. erpalam<sup>1</sup> evyr<sup>5</sup> kapase<sup>2</sup> pry<sup>0</sup> atyky<sup>1</sup>

58. av<sup>7</sup> ykle<sup>2</sup> pry<sup>0</sup> tyvla<sup>1</sup> el<sup>4</sup> pry<sup>0</sup> ryras<sup>1</sup>

59. pry<sup>0</sup> atyky<sup>1</sup> evlerar<sup>3</sup> oplos<sup>2</sup> el<sup>4</sup> erpalam<sup>1</sup> lemo<sup>0</sup> vasa<sup>1</sup> remetes<sup>3</sup>

60. erpalam<sup>1</sup> evyr<sup>5</sup> omale<sup>2</sup> lper<sup>9</sup> pry<sup>0</sup> vasa<sup>1</sup> tme1<sup>2</sup> remetes<sup>3</sup>

61. pry<sup>8</sup> omapa<sup>2</sup>

62. av<sup>7</sup> reram<sup>2</sup> pryma<sup>5</sup> vro<sup>4</sup> tmo<sup>0</sup> vocla<sup>1</sup> csacyce<sup>3</sup>
