# Supplementary material
Source: ML conference proceedings conference paper supplement (https://aclanthology.org/2021.teachingnlp-1.7)
Supplement: OptionalSupplementaryMaterial [file Biancaneve_it_plaintext.pdf › materials/out/Biancaneve_it_plaintext.pdf]

1. durante<sup>E</sup> una<sup>R</sup> giornata<sup>S</sup> nevosa<sup>A</sup> una<sup>R</sup> regina<sup>S</sup> cuciva<sup>V</sup> a<sup>E</sup> una<sup>R</sup> finestra<sup>S</sup>

2. dopo<sup>E</sup> qualche<sup>D</sup> tempo<sup>S</sup> la<sup>R</sup> regina<sup>S</sup> ebbe<sup>V</sup> una<sup>R</sup> bimba<sup>S</sup> bianca<sup>A</sup> come<sup>E</sup> la<sup>R</sup> neve<sup>S</sup>

3. per<sup>E</sup> questo<sup>P</sup> chiamarono<sup>V</sup> la<sup>R</sup> bambina<sup>S</sup> biancaneve<sup>S</sup>

4. dopo<sup>E</sup> la<sup>R</sup> morte<sup>S</sup> di<sup>E</sup> la<sup>R</sup> regina<sup>S</sup> il<sup>R</sup> re<sup>S</sup> sposò<sup>V</sup> una<sup>R</sup> donna<sup>S</sup> bella<sup>A</sup>

5. la<sup>R</sup> donna<sup>S</sup> possedeva<sup>V</sup> uno<sup>R</sup> specchio<sup>S</sup>

6. quando<sup>C</sup> guardava<sup>V</sup> in<sup>E</sup> lo<sup>R</sup> specchio<sup>S</sup>

7. diceva<sup>V</sup>

8. chi<sup>P</sup> è<sup>V</sup> bella<sup>A</sup> senza<sup>E</sup> rivali<sup>S</sup> in<sup>E</sup> questo<sup>D</sup> castello<sup>S</sup>

9. lo<sup>R</sup> specchio<sup>S</sup> rispondeva<sup>V</sup> a<sup>E</sup> la<sup>R</sup> regina<sup>S</sup>

10. tu<sup>P</sup> sei<sup>V</sup> bella<sup>A</sup> senza<sup>E</sup> rivali<sup>S</sup> regina<sup>S</sup>

11. dopo<sup>E</sup> qualche<sup>D</sup> tempo<sup>S</sup> la<sup>R</sup> regina<sup>S</sup> chiese<sup>V</sup> a<sup>E</sup> lo<sup>R</sup> specchio<sup>S</sup>

12. chi<sup>P</sup> è<sup>V</sup> bella<sup>A</sup> senza<sup>E</sup> rivali<sup>S</sup> in<sup>E</sup> questo<sup>D</sup> castello<sup>S</sup>

13. lo<sup>R</sup> specchio<sup>S</sup> rispose<sup>V</sup> a<sup>E</sup> la<sup>R</sup> regina<sup>S</sup>

14. biancaneve<sup>S</sup> è<sup>V</sup> bella<sup>A</sup> senza<sup>E</sup> rivali<sup>S</sup> in<sup>E</sup> questo<sup>D</sup> castello<sup>S</sup>

15. la<sup>R</sup> regina<sup>S</sup> gelosa<sup>A</sup> ordinò<sup>V</sup> a<sup>E</sup> un<sup>R</sup> cacciatore<sup>S</sup> di<sup>Z</sup> uccidere<sup>V</sup> biancaneve<sup>S</sup>

16. ma<sup>C</sup> la<sup>R</sup> ragazza<sup>S</sup> riuscì<sup>V</sup> a<sup>Z</sup> scappare<sup>V</sup> in<sup>E</sup> il<sup>R</sup> bosco<sup>S</sup>

17. quando<sup>C</sup> arrivò<sup>V</sup> la<sup>R</sup> sera<sup>S</sup>

18. biancaneve<sup>S</sup> vide<sup>V</sup> una<sup>R</sup> piccola<sup>A</sup> casa<sup>S</sup>



19. entrò<sup>V</sup> per<sup>Z</sup> riposare<sup>V</sup>



20. ogni<sup>D</sup> cosa<sup>S</sup> in<sup>E</sup> la<sup>R</sup> casina<sup>S</sup> era<sup>V</sup> minuscola<sup>A</sup>



21. il<sup>R</sup> tavolino<sup>S</sup> era ricoperto<sup>V</sup> da<sup>E</sup> una<sup>R</sup> tovaglia<sup>S</sup> candida<sup>A</sup>



22. era apparecchiato<sup>V</sup> con<sup>E</sup> sette<sup>D</sup> piattini<sup>S</sup>



23. ogni<sup>D</sup> piattino<sup>S</sup> aveva<sup>V</sup> il<sup>R</sup> suo<sup>A</sup> cucchiaino<sup>S</sup>



24. ci erano<sup>V</sup> sette<sup>D</sup> coltelli<sup>S</sup> sette<sup>D</sup> forchette<sup>S</sup> sette<sup>D</sup> bicchierini<sup>S</sup>



25. biancaneve<sup>S</sup> si addormentò<sup>V</sup> su<sup>E</sup> un<sup>R</sup> lettino<sup>S</sup>



26. quando<sup>C</sup> scese<sup>V</sup> la<sup>R</sup> notte<sup>S</sup>



27. tornarono<sup>V</sup> i<sup>R</sup> padroni<sup>S</sup> di<sup>E</sup> casa<sup>S</sup>

28. erano<sup>V</sup> nani<sup>S</sup> che<sup>Z</sup> estraevano<sup>V</sup> l'<sup>R</sup> oro<sup>S</sup> da<sup>E</sup> i<sup>R</sup> monti<sup>S</sup>

29. i<sup>R</sup> nani<sup>S</sup> si accorsero<sup>V</sup> che<sup>Z</sup> era entrato<sup>V</sup> qualcuno<sup>P</sup>

30. un<sup>R</sup> nano<sup>S</sup> chiese<sup>V</sup>

31. chi<sup>P</sup> ha preso<sup>V</sup> un<sup>R</sup> pezzo<sup>S</sup> di<sup>E</sup> il<sup>R</sup> mio<sup>D</sup> panino<sup>S</sup>

32. un<sup>R</sup> altro<sup>A</sup> nano<sup>S</sup> disse<sup>V</sup>

33. chi<sup>P</sup> ha usato<sup>V</sup> la<sup>R</sup> mia<sup>A</sup> forchettina<sup>S</sup>

34. a<sup>E</sup> il<sup>R</sup> mattino<sup>S</sup> biancaneve<sup>S</sup> si svegliò<sup>V</sup>

35. i<sup>R</sup> nani<sup>S</sup> chiesero<sup>V</sup> a<sup>E</sup> biancaneve<sup>S</sup> con<sup>E</sup> gentilezza<sup>S</sup>

36. come<sup>B</sup> ti chiami<sup>V</sup>

37. mi chiamo<sup>V</sup> biancaneve<sup>S</sup>

38. biancaneve<sup>S</sup> rispose<sup>V</sup> a<sup>E</sup> i<sup>R</sup> nani<sup>S</sup>

39. come<sup>B</sup> sei arrivata<sup>V</sup> in<sup>E</sup> la<sup>R</sup> nostra<sup>D</sup> casina<sup>S</sup>

40. le<sup>P</sup> chiesero<sup>V</sup> i<sup>R</sup> nani<sup>S</sup>

41. biancaneve<sup>S</sup> rispose<sup>V</sup> che<sup>Z</sup> la<sup>R</sup> regina<sup>S</sup> la<sup>P</sup> voleva<sup>V</sup> uccidere<sup>V</sup>

42. ma<sup>C</sup> lei<sup>P</sup> riuscì<sup>V</sup> a<sup>Z</sup> scappare<sup>V</sup> da<sup>E</sup> i<sup>R</sup> nani<sup>S</sup>

43. uno<sup>P</sup> di<sup>E</sup> i<sup>R</sup> nani<sup>S</sup> chiese<sup>V</sup> a<sup>E</sup> biancaneve<sup>S</sup> di<sup>Z</sup> rimanere<sup>V</sup> con<sup>E</sup> loro<sup>P</sup> in<sup>E</sup> la<sup>R</sup> casina<sup>S</sup>

44. biancaneve<sup>S</sup> accettò<sup>V</sup> felice<sup>A</sup>

45. di<sup>E</sup> giorno<sup>S</sup> i<sup>R</sup> nani<sup>S</sup> andavano<sup>V</sup> su<sup>E</sup> i<sup>R</sup> monti<sup>S</sup> a<sup>Z</sup> cercare<sup>V</sup> l'<sup>R</sup> oro<sup>S</sup>

46. biancaneve<sup>S</sup> rimaneva<sup>V</sup> sola<sup>A</sup> in<sup>E</sup> la<sup>R</sup> casina<sup>S</sup>

47. intanto<sup>B</sup> in<sup>E</sup> il<sup>R</sup> castello<sup>S</sup> la<sup>R</sup> regina<sup>S</sup> chiedeva<sup>V</sup> a<sup>E</sup> lo<sup>R</sup> specchio<sup>S</sup>

48. chi<sup>P</sup> è<sup>V</sup> bella<sup>A</sup> senza<sup>E</sup> rivali<sup>S</sup> in<sup>E</sup> questo<sup>D</sup> castello<sup>S</sup>

49. lo<sup>R</sup> specchio<sup>S</sup> rispose<sup>V</sup>

50. in<sup>E</sup> il<sup>R</sup> castello<sup>S</sup> tu<sup>P</sup> non<sup>B</sup> hai<sup>V</sup> rivali<sup>S</sup> regina<sup>S</sup>

51. ma<sup>C</sup> in<sup>E</sup> la<sup>R</sup> casina<sup>S</sup> biancaneve<sup>S</sup> è<sup>V</sup> bella<sup>A</sup> senza<sup>E</sup> rivali<sup>S</sup>

52. la<sup>R</sup> regina<sup>S</sup> capì<sup>V</sup> l'<sup>R</sup> inganno<sup>S</sup> del<sup>E</sup> cacciatore<sup>S</sup>

53. e<sup>C</sup> disse<sup>V</sup>

54. allora<sup>B</sup> ucciderò<sup>V</sup> biancaneve<sup>S</sup> io<sup>P</sup> stessa<sup>A</sup>

55. si travestì<sup>V</sup> da<sup>E</sup> vecchia<sup>A</sup> strega<sup>S</sup>

56. andò<sup>V</sup> a<sup>E</sup> la<sup>R</sup> casa<sup>S</sup> di<sup>E</sup> i<sup>R</sup> sette<sup>A</sup> nani<sup>S</sup>

57. biancaneve<sup>S</sup> non<sup>B</sup> riconobbe<sup>V</sup> la<sup>R</sup> regina<sup>S</sup>

58. e<sup>C</sup> aprì<sup>V</sup> la<sup>R</sup> porta<sup>S</sup> a<sup>E</sup> la<sup>R</sup> vecchia<sup>S</sup>

59. la<sup>R</sup> regina<sup>S</sup> travestita<sup>A</sup> offrì<sup>V</sup> a<sup>E</sup> biancaneve<sup>S</sup> una<sup>R</sup> mela<sup>S</sup> avvelenata<sup>A</sup>

60. biancaneve<sup>S</sup> non<sup>B</sup> sapeva<sup>V</sup> che<sup>Z</sup> la<sup>R</sup> mela<sup>S</sup> era<sup>V</sup> avvelenata<sup>A</sup>

61. la<sup>P</sup> morse<sup>V</sup>

62. e<sup>C</sup> cadde<sup>V</sup> subito<sup>B</sup> in<sup>E</sup> un<sup>R</sup> sonno<sup>S</sup> profondissimo<sup>A</sup>
