# Supplementary material
Source: ML conference proceedings conference paper supplement (https://aclanthology.org/2021.teachingnlp-1.7)

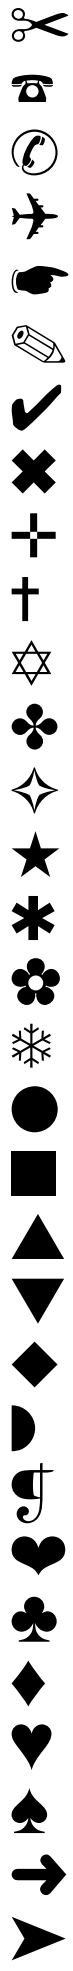

Supplement: OptionalSupplementaryMaterial [file 0210_dings_all_the_dings.pdf › materials/out/0210_dings_all_the_dings.pdf]

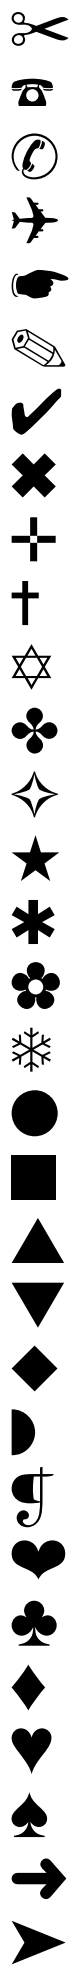

Supplement: OptionalSupplementaryMaterial [file Biancaneve_en_dings_all_the_dings.pdf › materials/out/Biancaneve_en_dings_all_the_dings.pdf]



Supplement: OptionalSupplementaryMaterial [file Biancaneve_it_dings_all_the_dings.pdf › materials/out/Biancaneve_it_dings_all_the_dings.pdf]

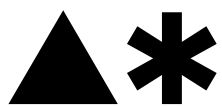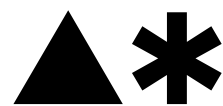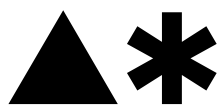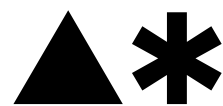

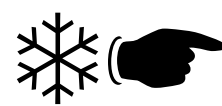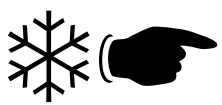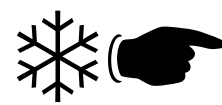

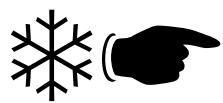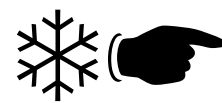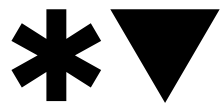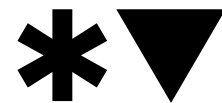

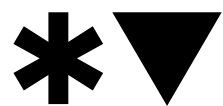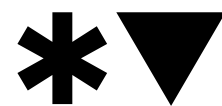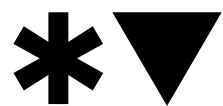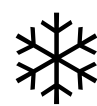

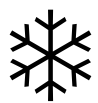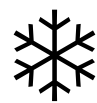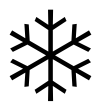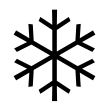

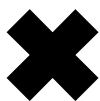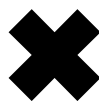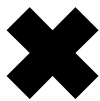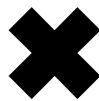

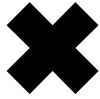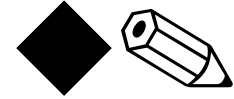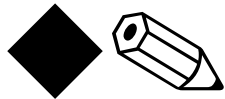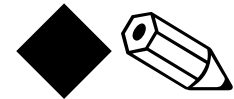

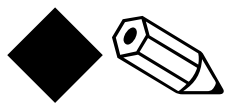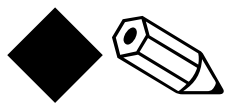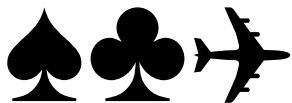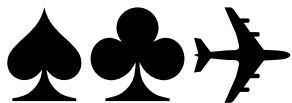



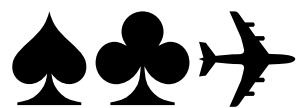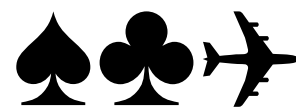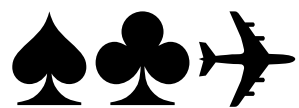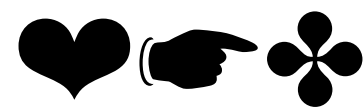

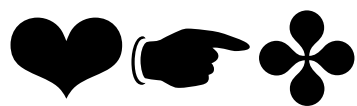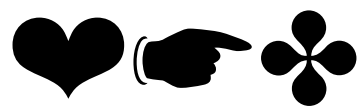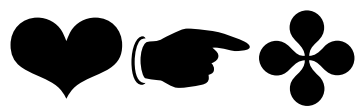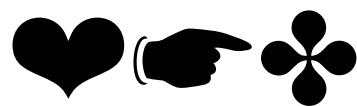

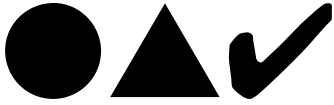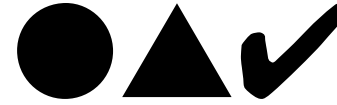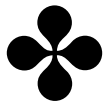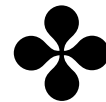

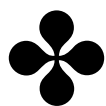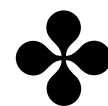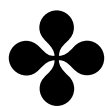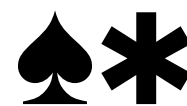

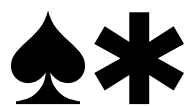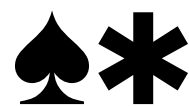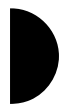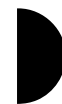

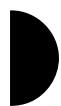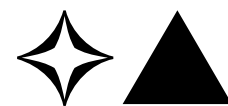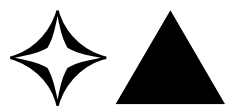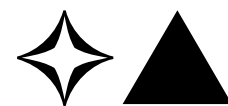

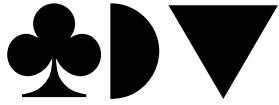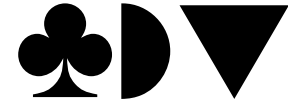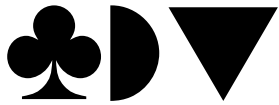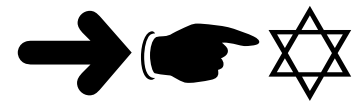

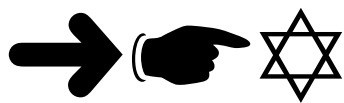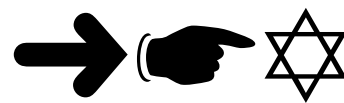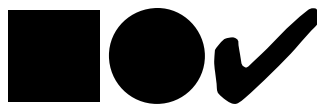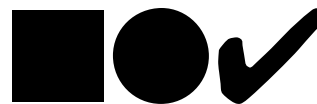



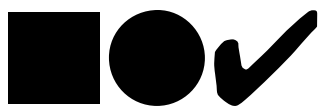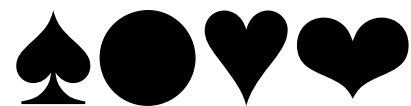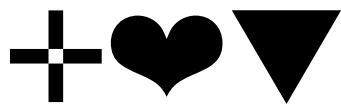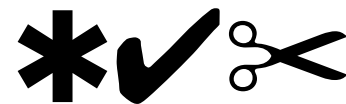

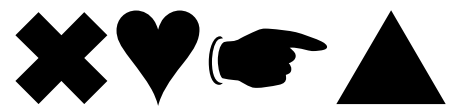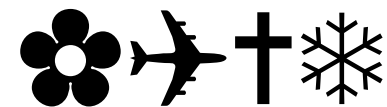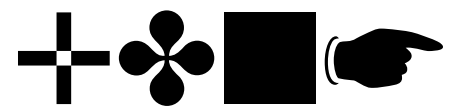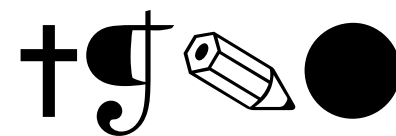

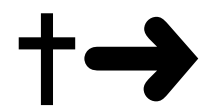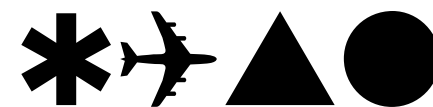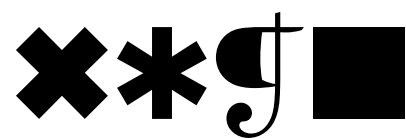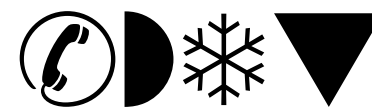

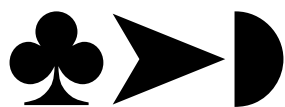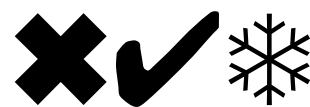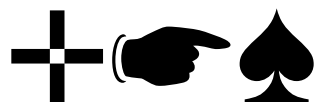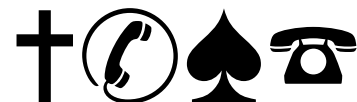

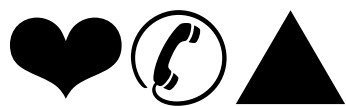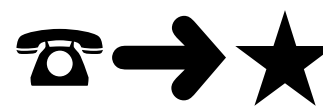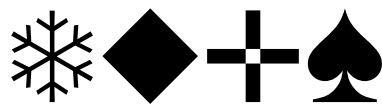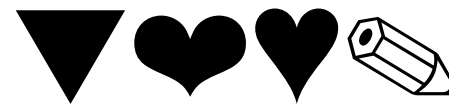

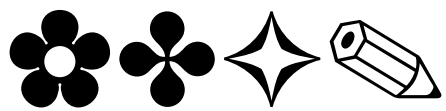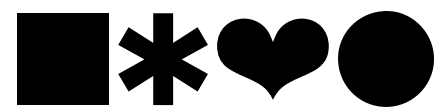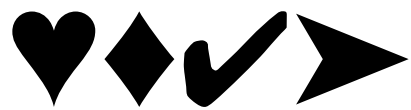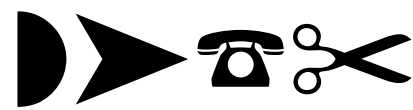

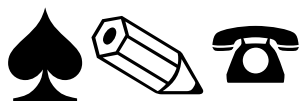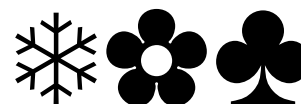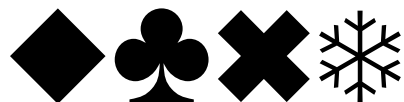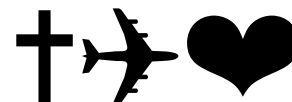

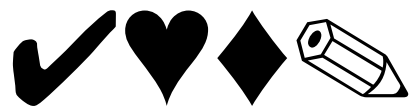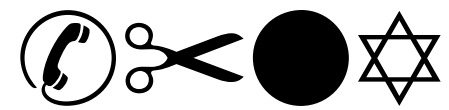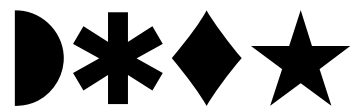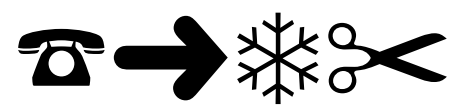



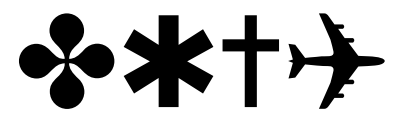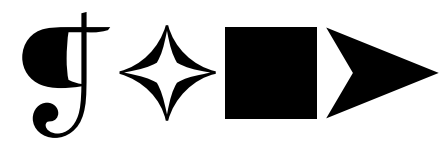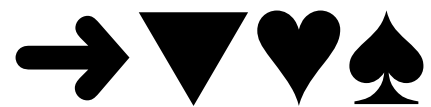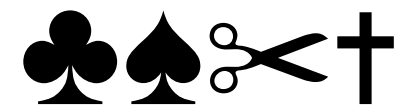

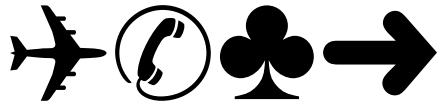

Supplement: OptionalSupplementaryMaterial [file 0210_dings_cards_activity_1_t-2x2.pdf › materials/tmp/0210_dings_cards_activity_1_t-2x2.pdf]

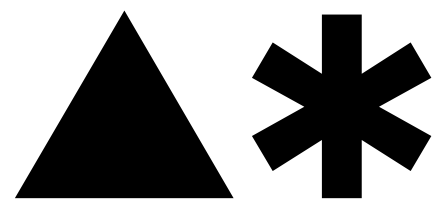







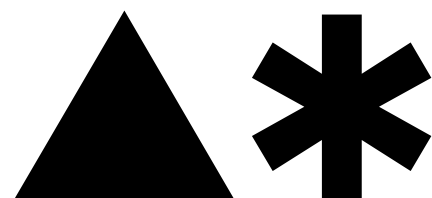

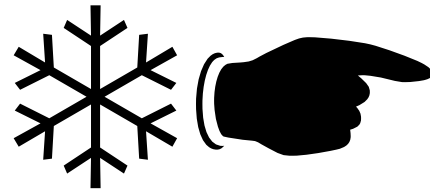











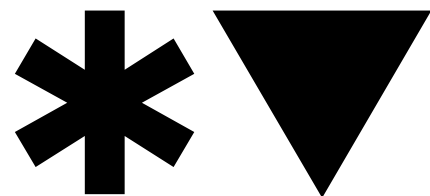





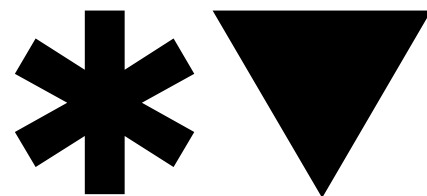



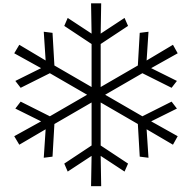







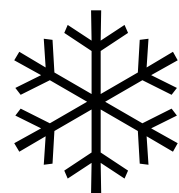



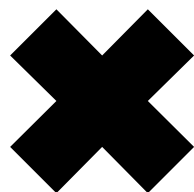











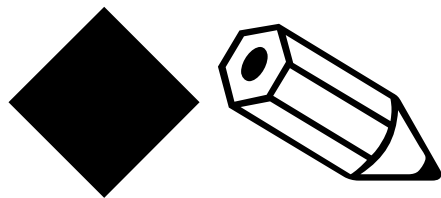









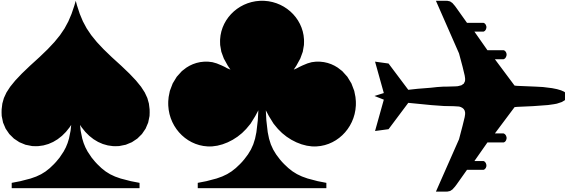

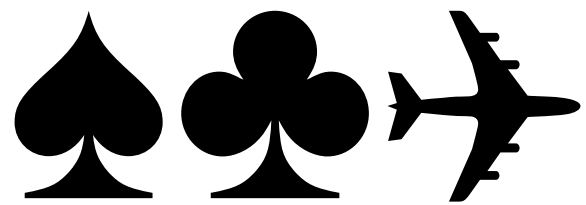









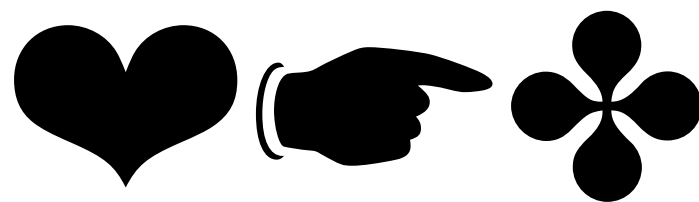

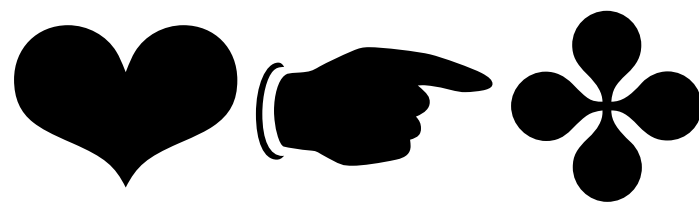









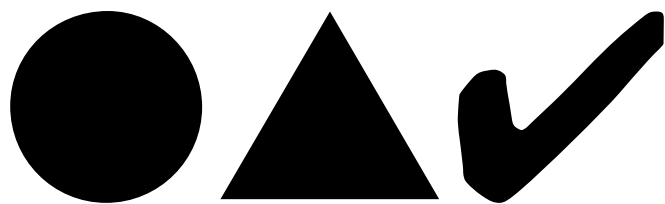



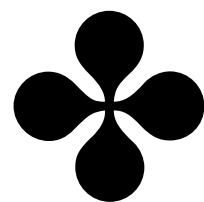









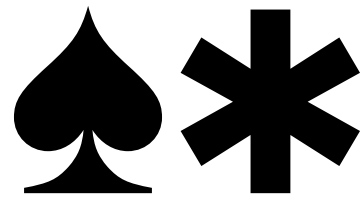



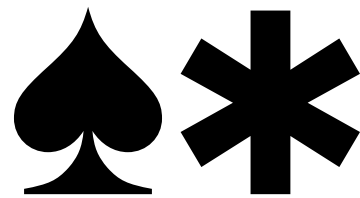



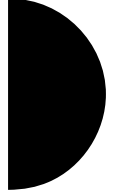





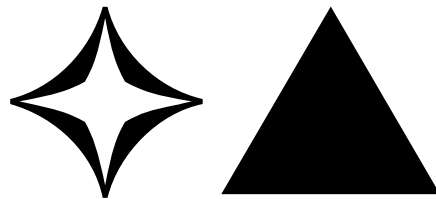







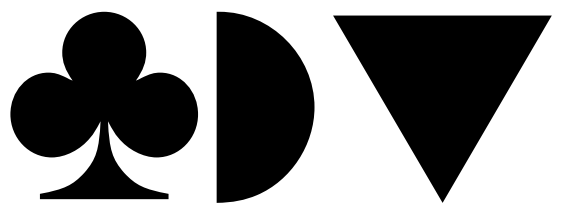





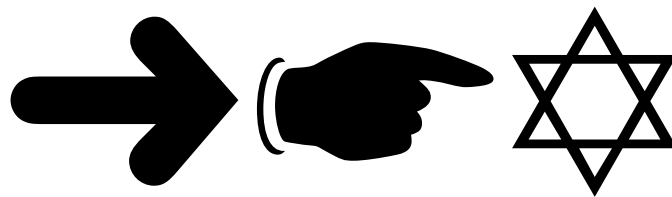





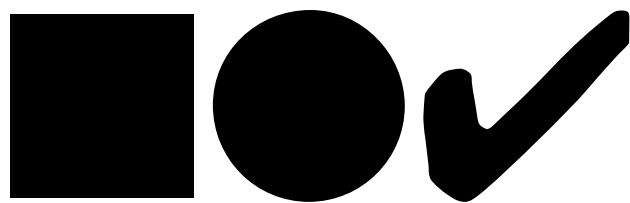







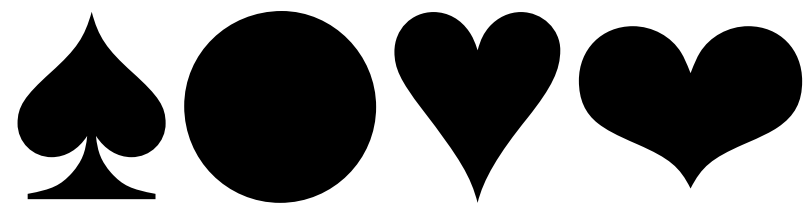

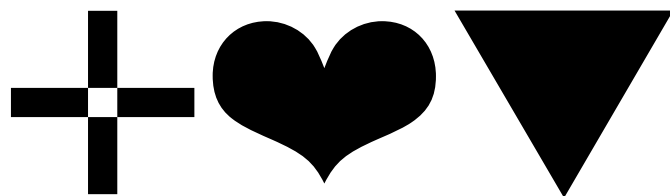

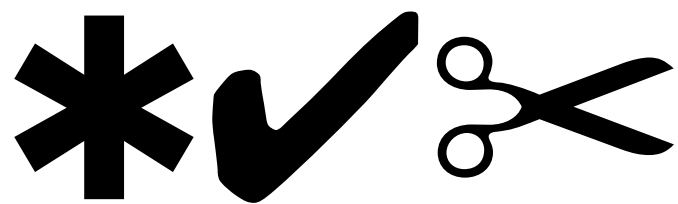

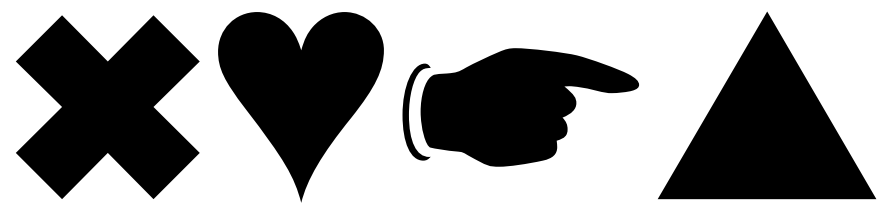

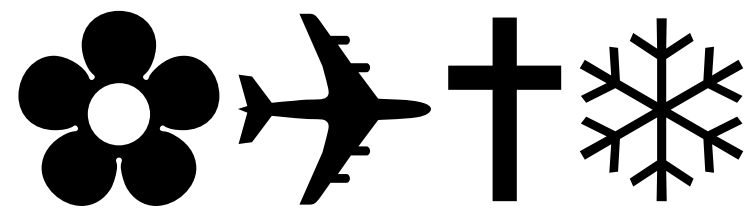

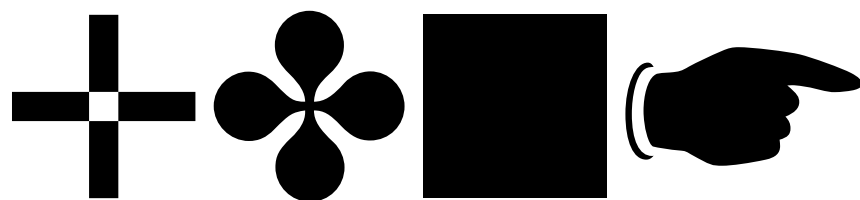

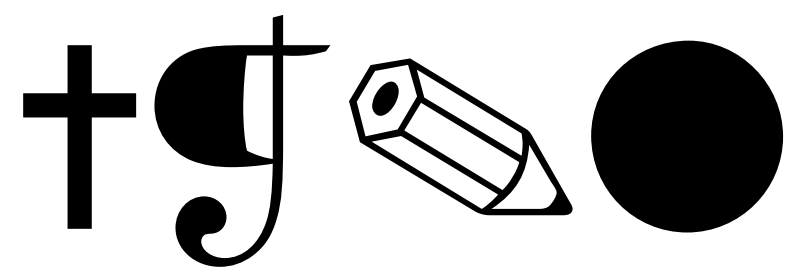



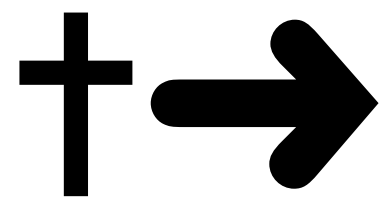

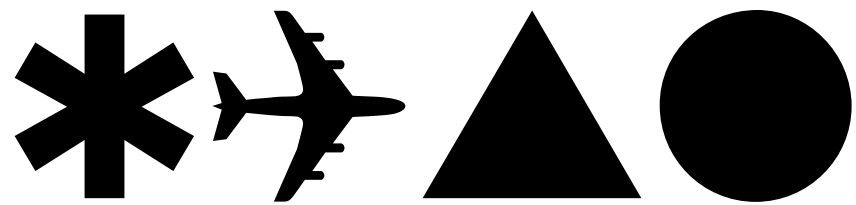

✕✱୨■

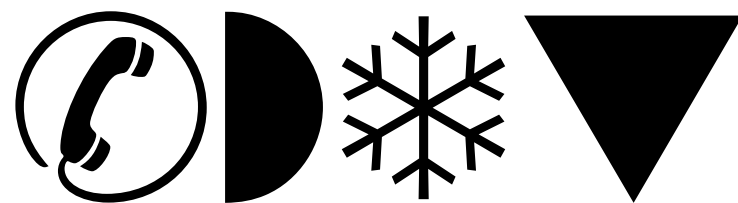

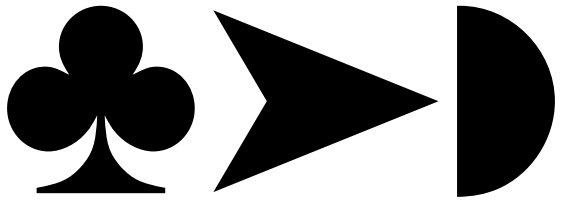

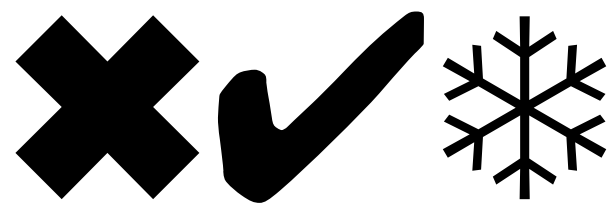

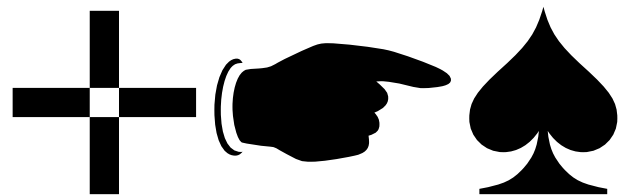

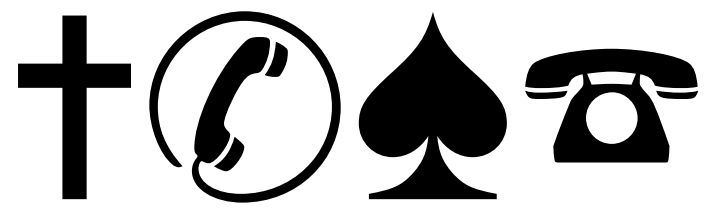



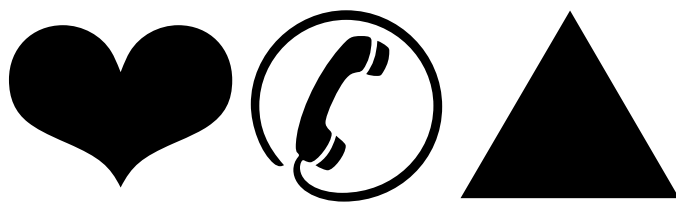

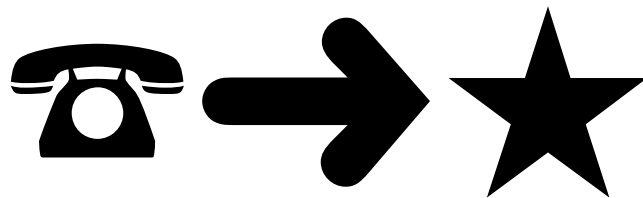

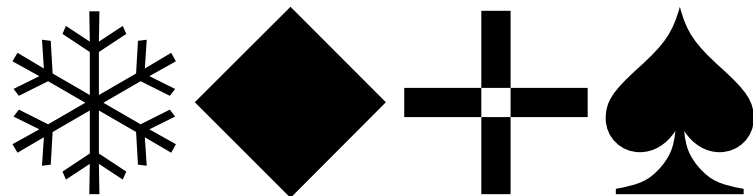

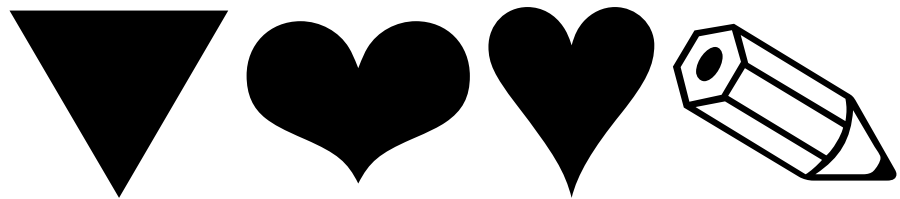

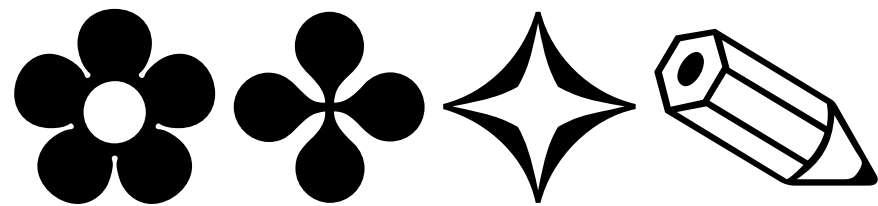

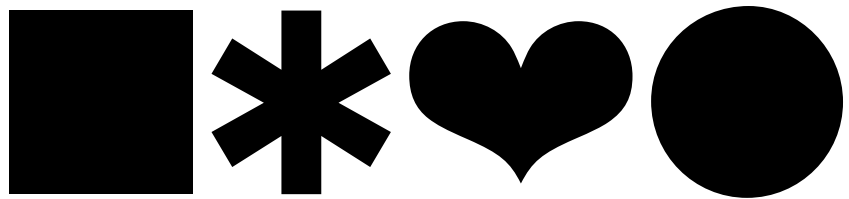

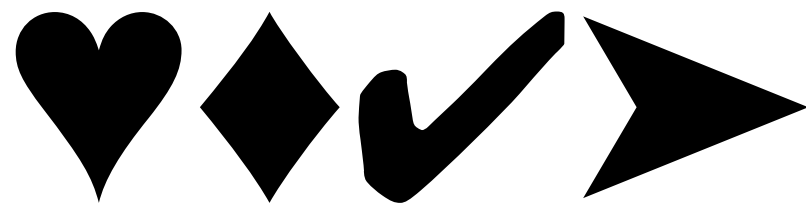

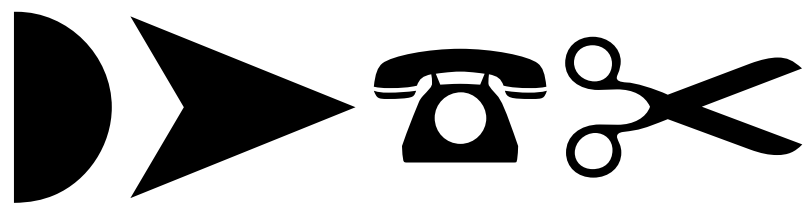



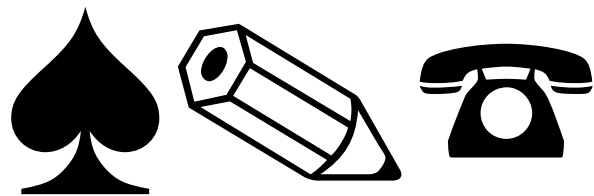

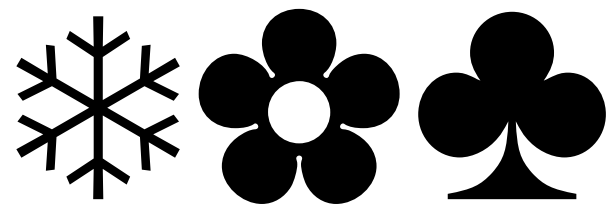

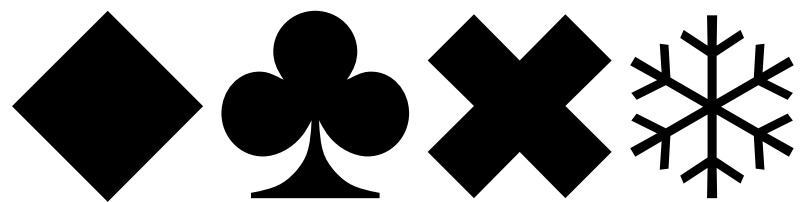

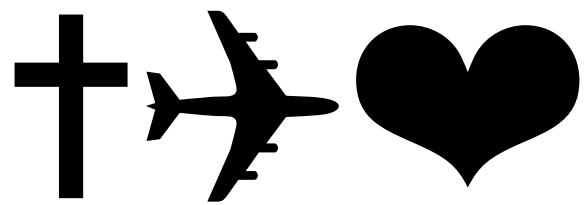

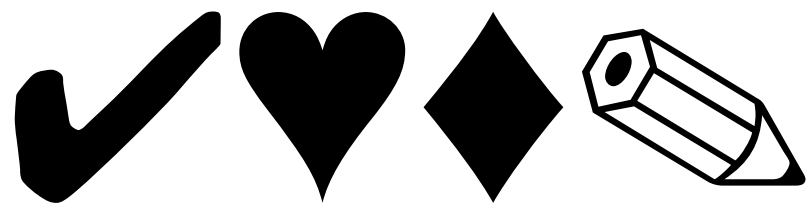

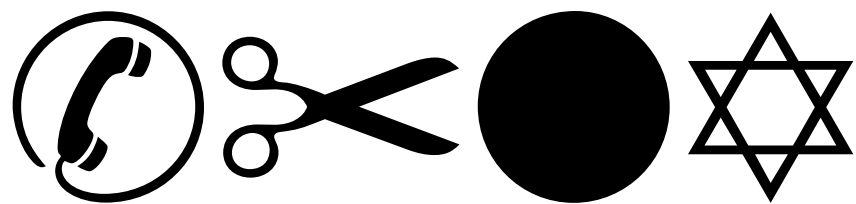

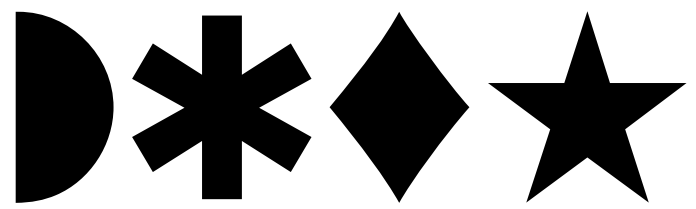

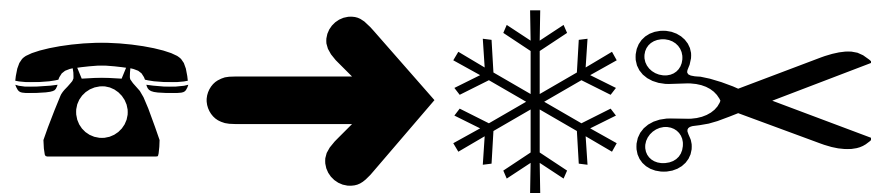



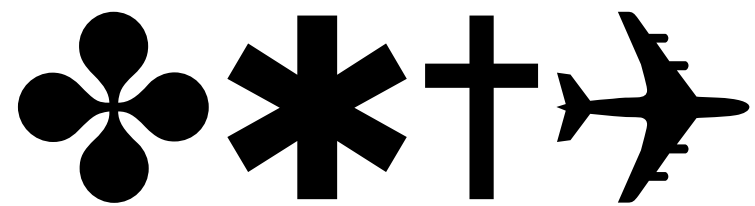

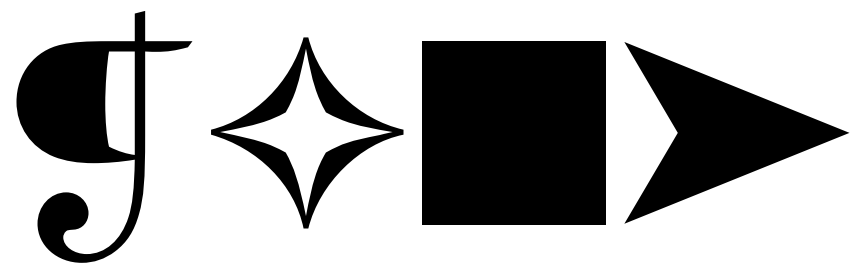

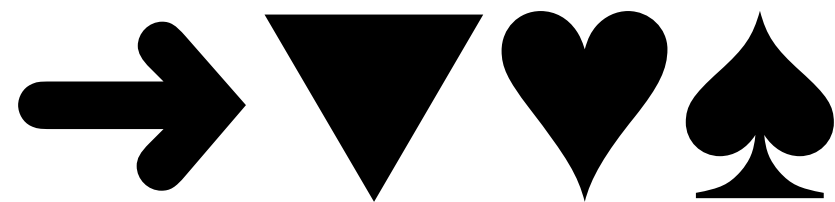

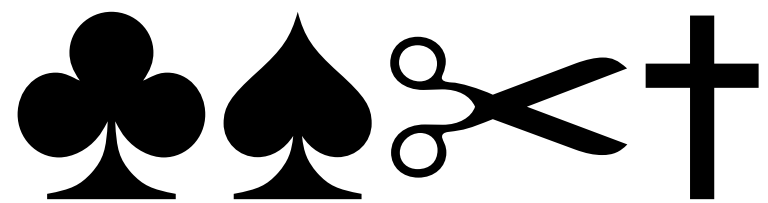

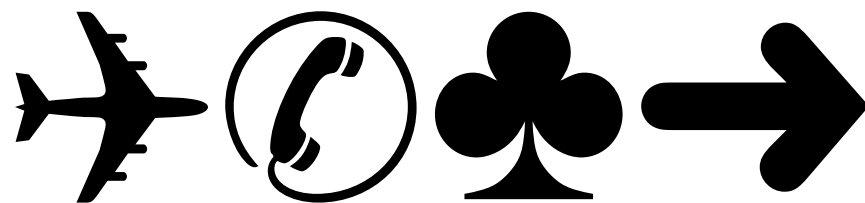

Supplement: OptionalSupplementaryMaterial [file 0210_dings_cards_activity_1_t.pdf › materials/tmp/0210_dings_cards_activity_1_t.pdf]

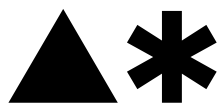

4

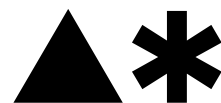

4

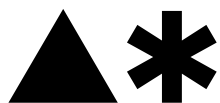

4

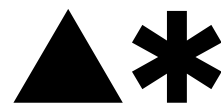

4

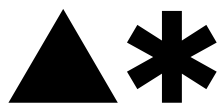

4

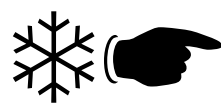

4

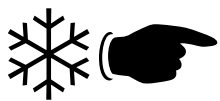

4

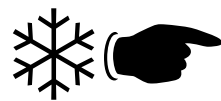

4

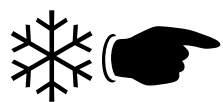

4

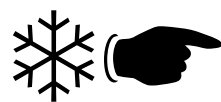

4

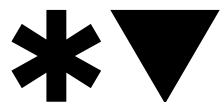

4

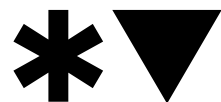

4

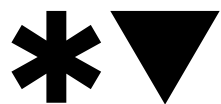

4

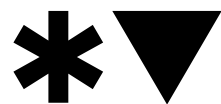

4

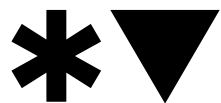

4

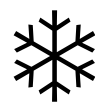

4

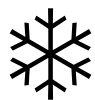

4

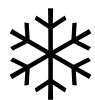

4

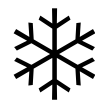

4

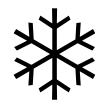

4

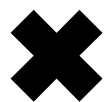

4

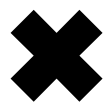

4

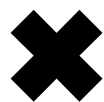

4

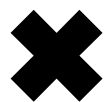

4

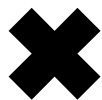

4

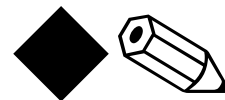

4

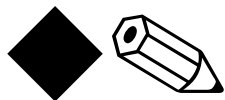

4

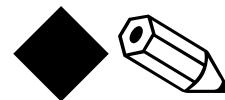

4

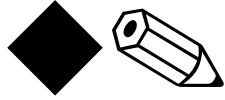

4

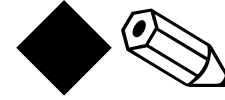

4

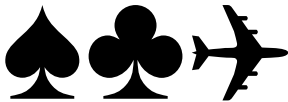

4

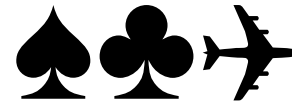

4



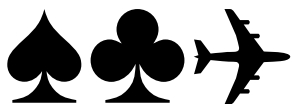

4

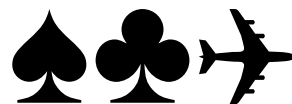

4

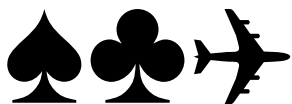

4

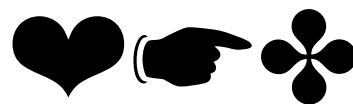

4

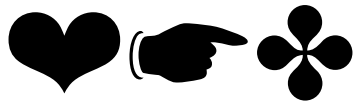

4

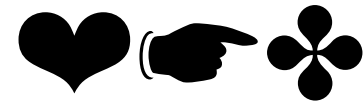

4

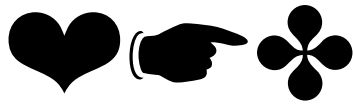

4

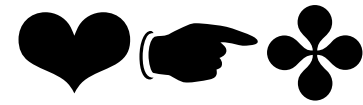

4

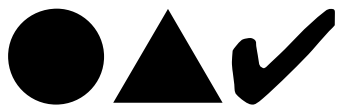

7

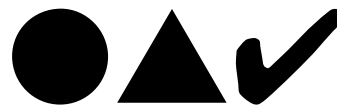

7

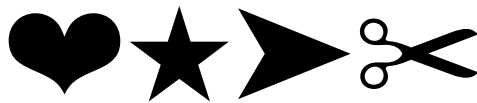

7

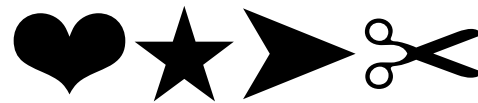

7

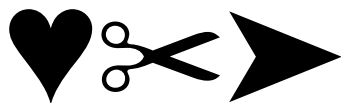

7

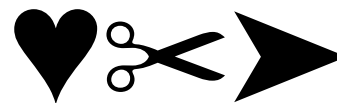

7

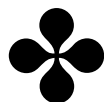

9

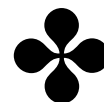

9

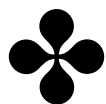

9

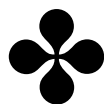

9

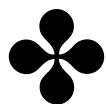

9

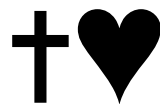

9

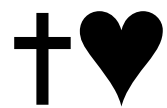

9

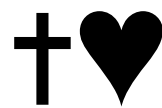

9

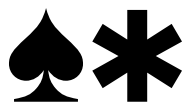

3

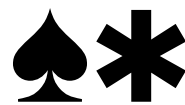

3

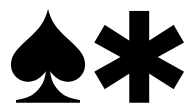

3

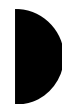

3

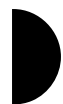

3

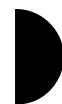

3

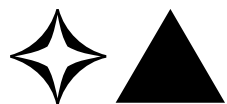

3

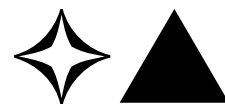

3

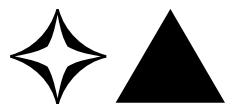

3

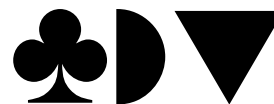

3



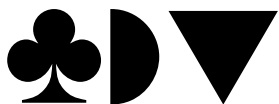

3

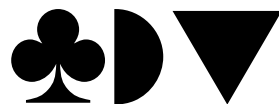

3

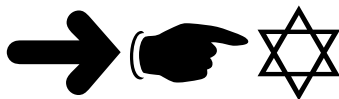

0

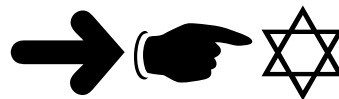

0

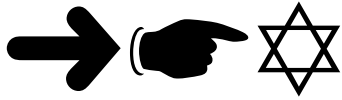

0

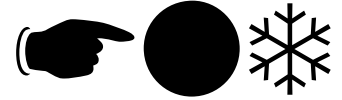

0

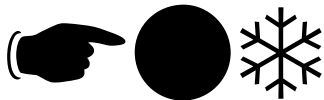

0

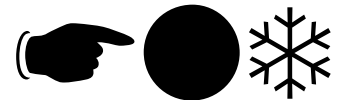

0

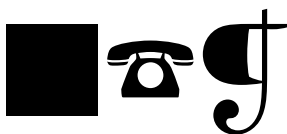

0

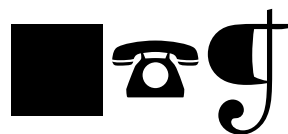

0

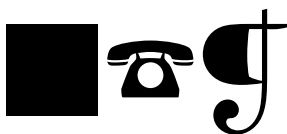

0

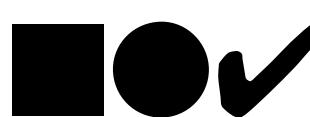

8

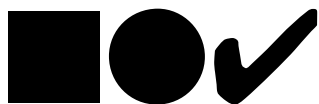

8

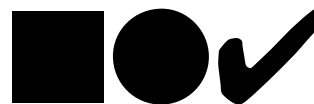

8

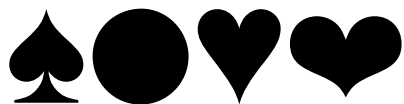

6

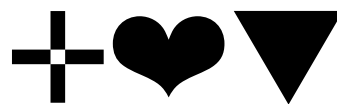

6

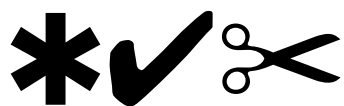

6

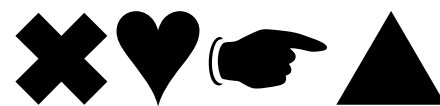

6

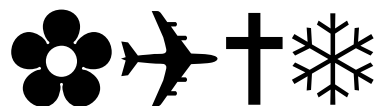

6

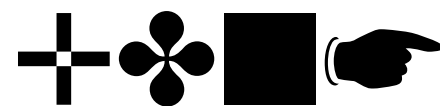

6

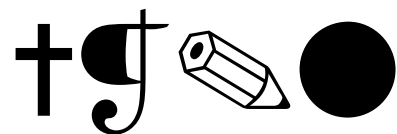

6

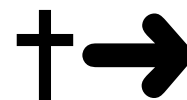

6

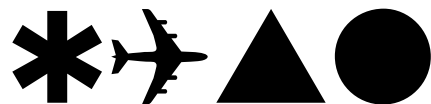

6

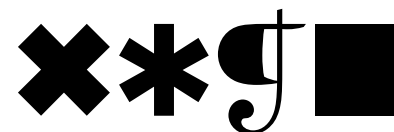

6

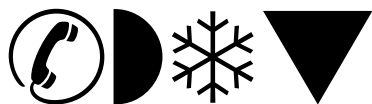

6

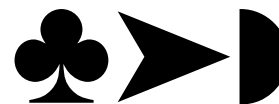

6

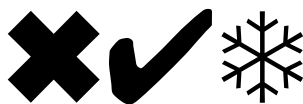

6

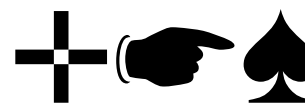

6

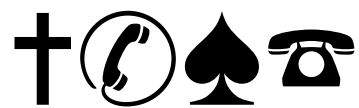

6

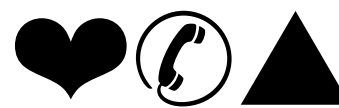

6

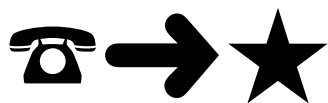

6

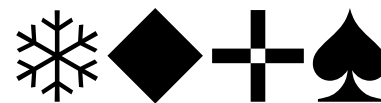

6



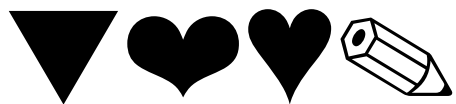

6

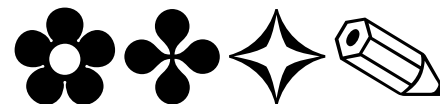

6

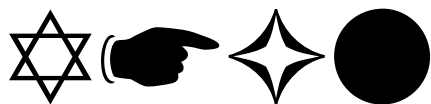

6

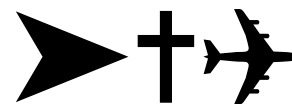

6

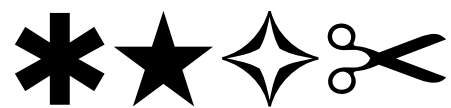

6

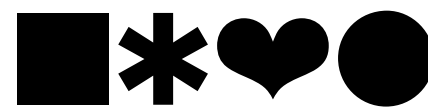

1

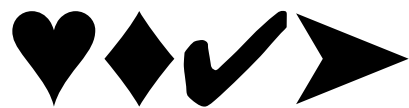

1

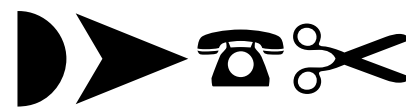

1

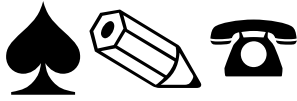

1

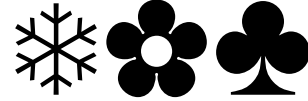

1

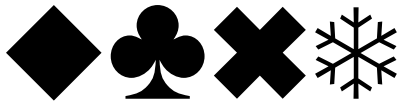

1

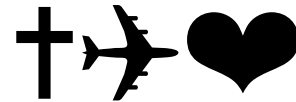

1

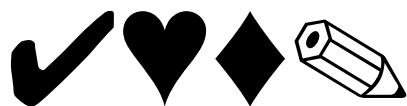

1

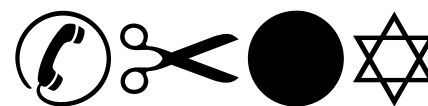

1

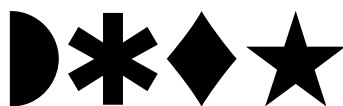

1

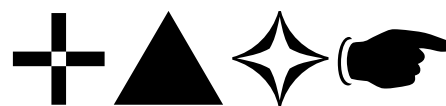

1

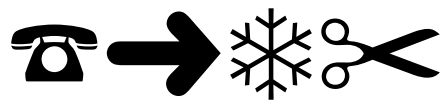

2

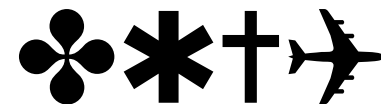

2

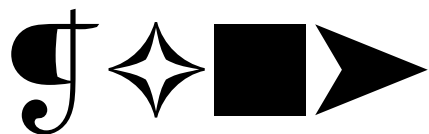

2

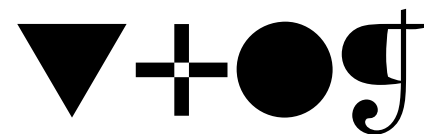

2



5

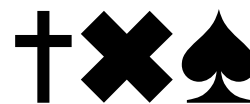

5

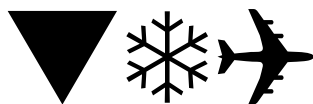

5

Supplement: OptionalSupplementaryMaterial [file 0210_dings_cards_activity_2_t-2x2.pdf › materials/tmp/0210_dings_cards_activity_2_t-2x2.pdf]

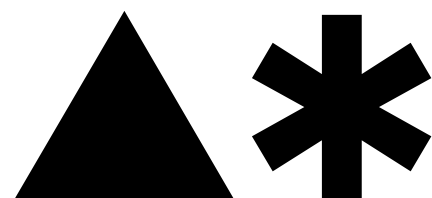

4



4



4



4



4

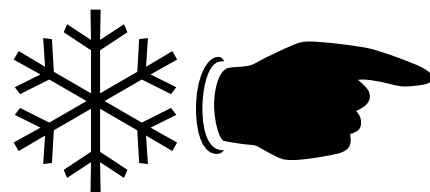

4



4



4





4



4

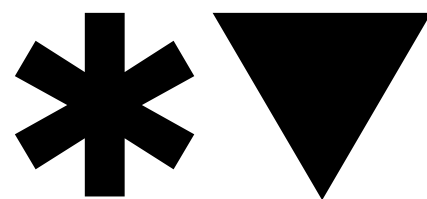

4



4



4



4



4

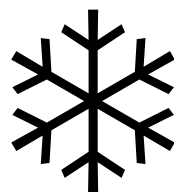

4





4



4



4



4

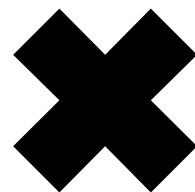

4



4

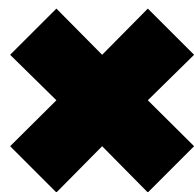

4



4





4

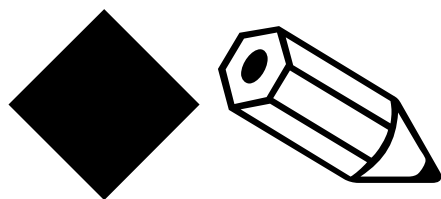

4



4



4



4



4

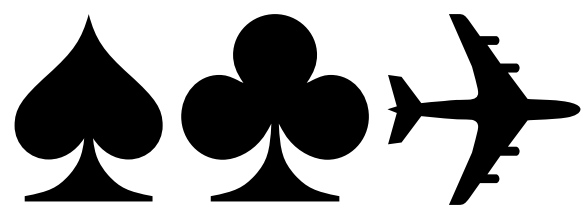

4



4





4

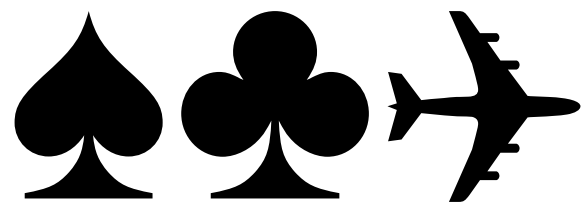

4



4

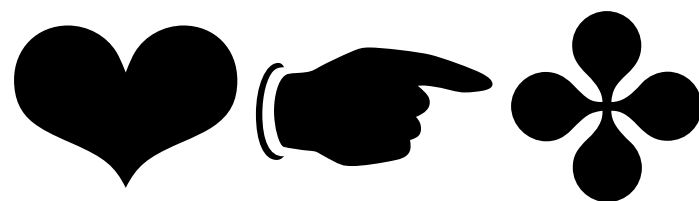

4

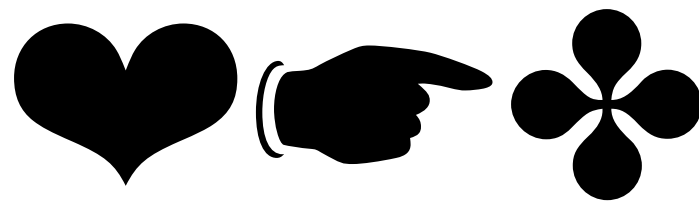

4



4



4



4



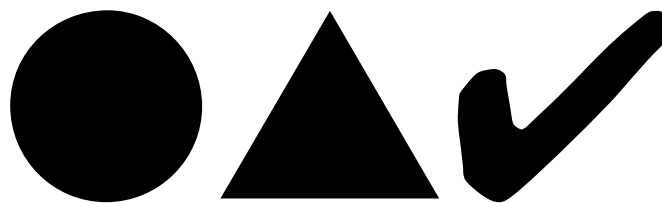

7



7

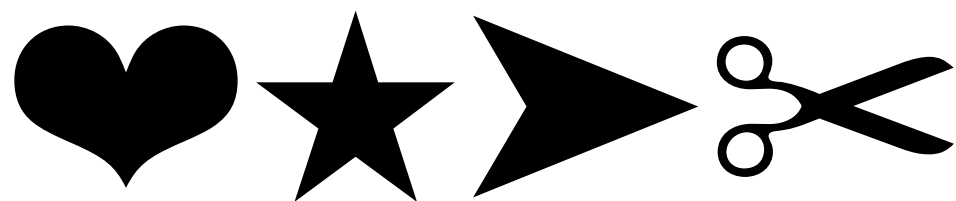

7

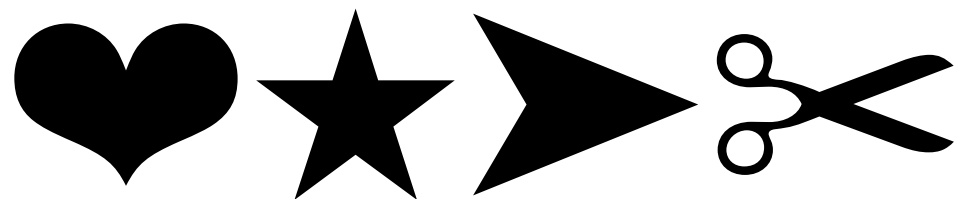

7

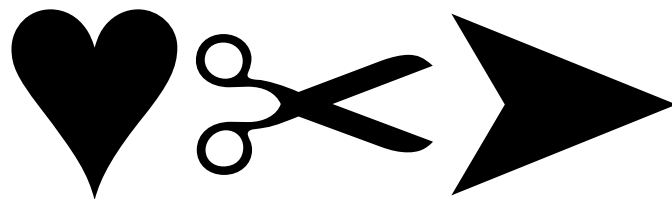

7



7

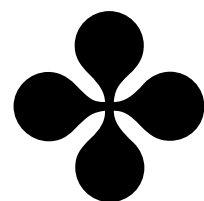

9



9





9



9



9

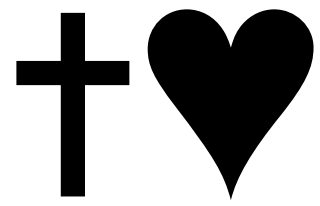

9



9

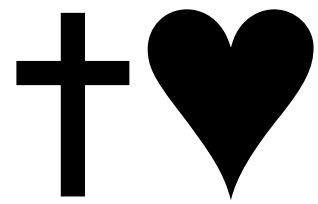

9

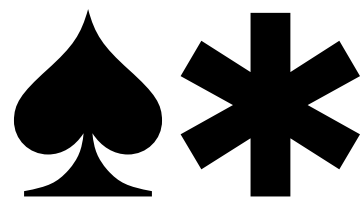

3



3



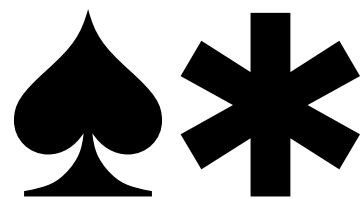

3

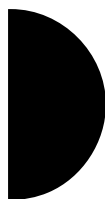

3



3



3

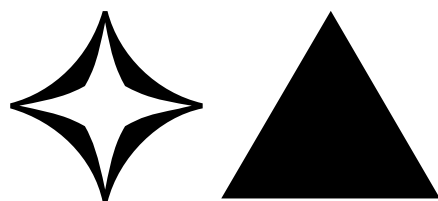

3



3



3

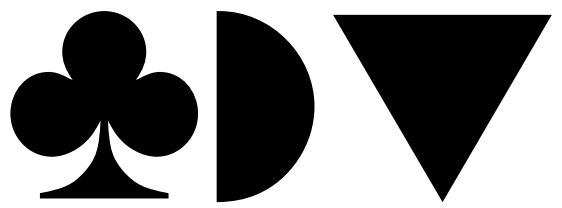

3





3



3

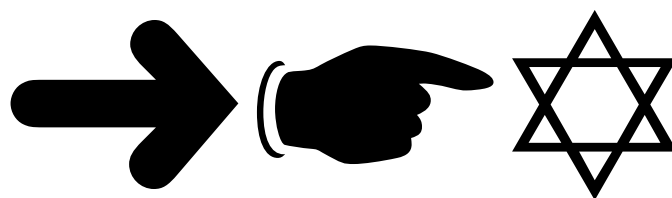

0



0



0

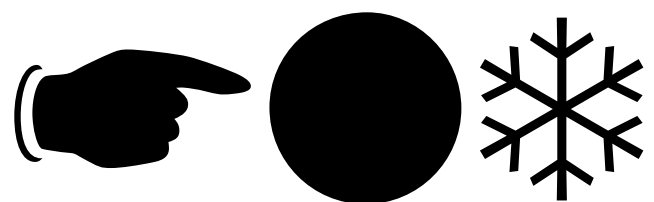

0



0

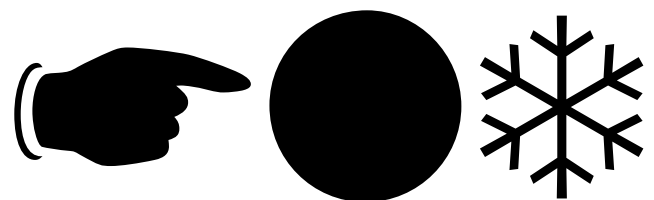

0



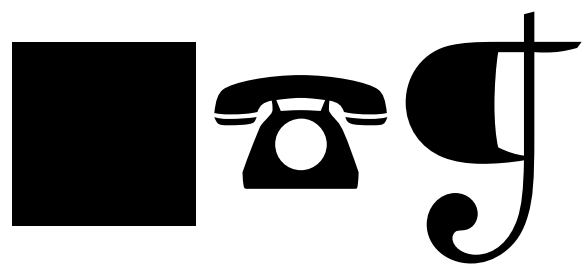

0

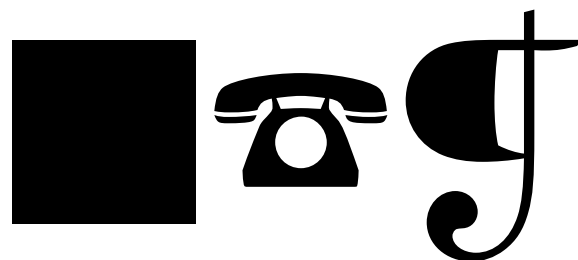

0

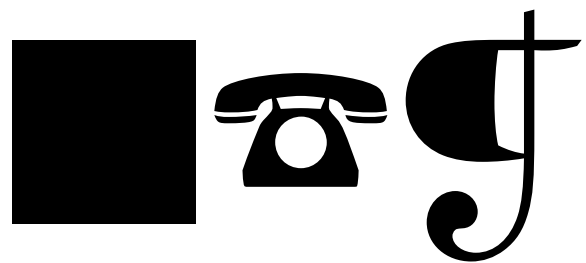

0

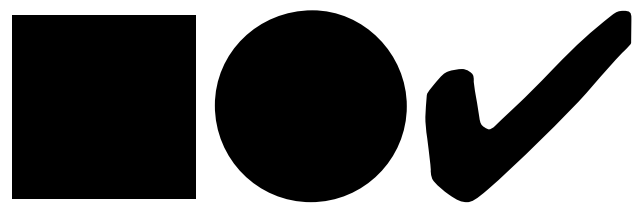

8

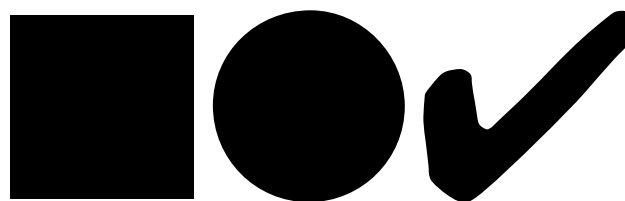

8



8

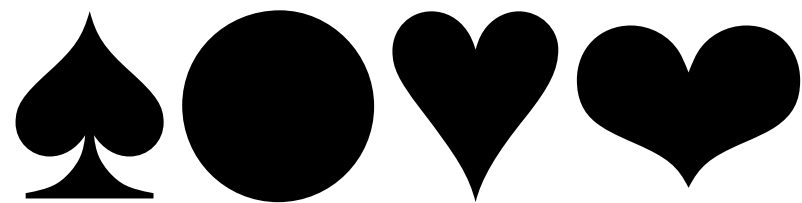

6

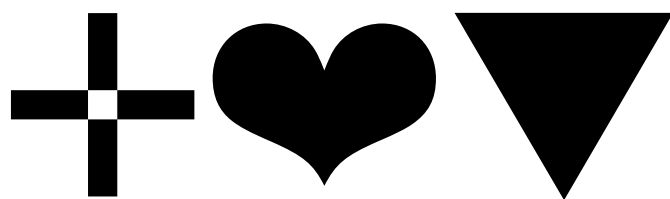

6



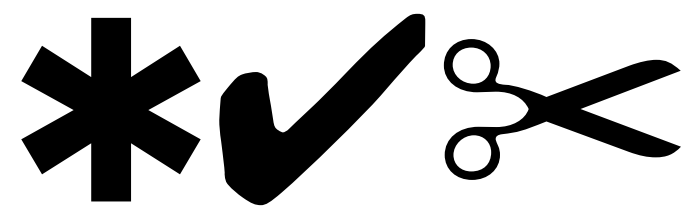

6

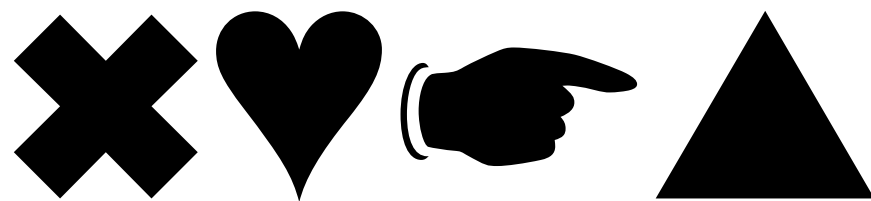

6

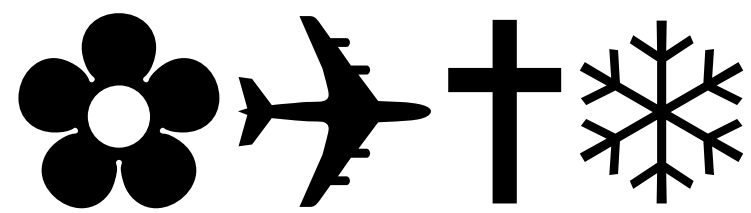

6

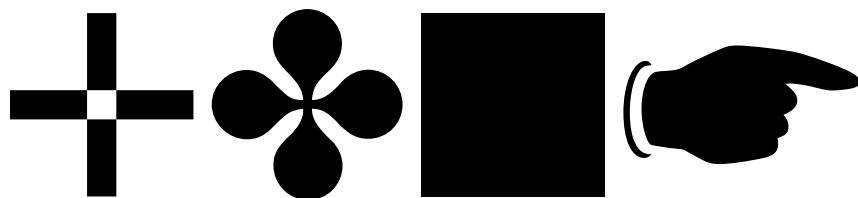

6

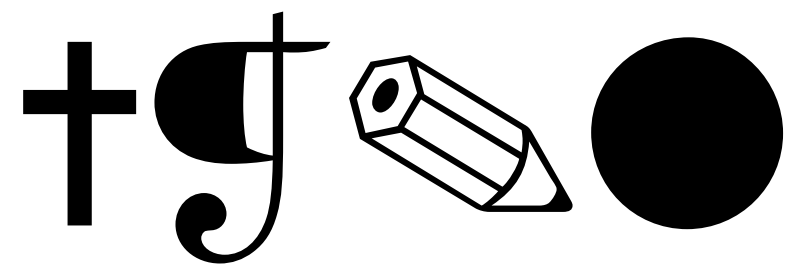

6

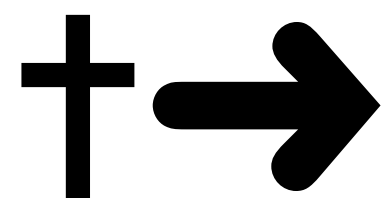

6

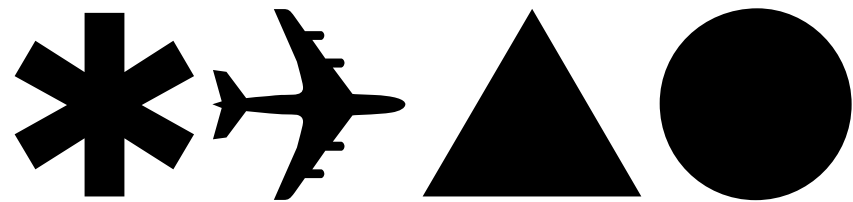

6

✕✱୨■

6



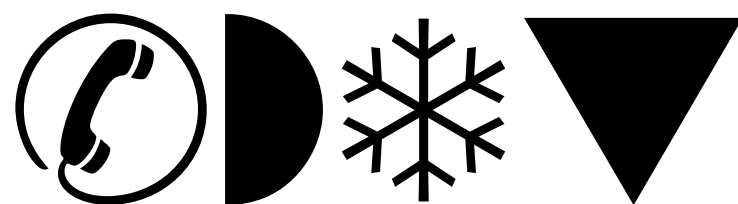

6

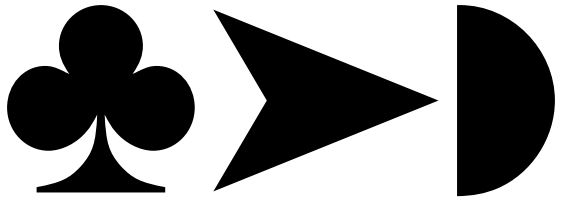

6

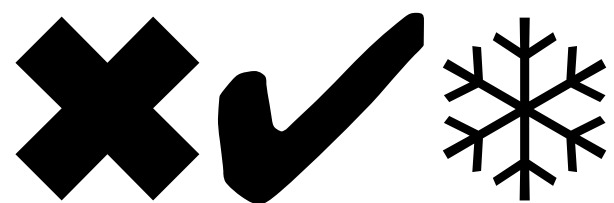

6

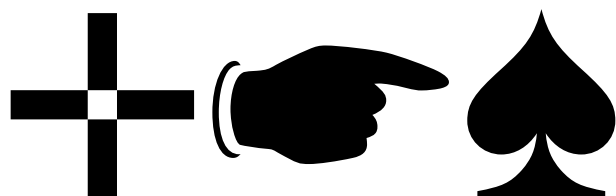

6

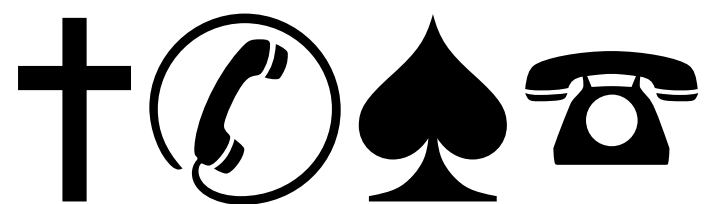

6

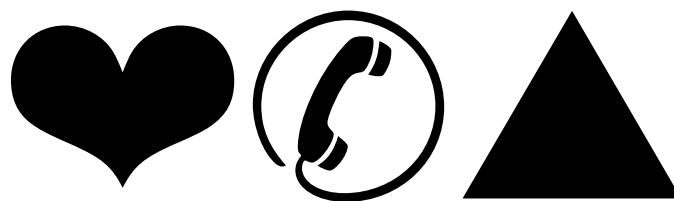

6

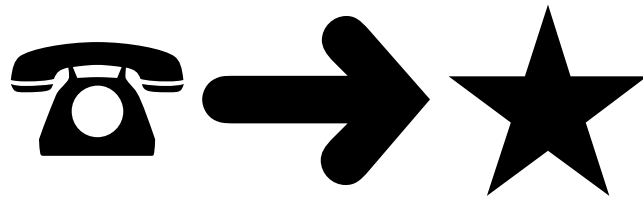

6

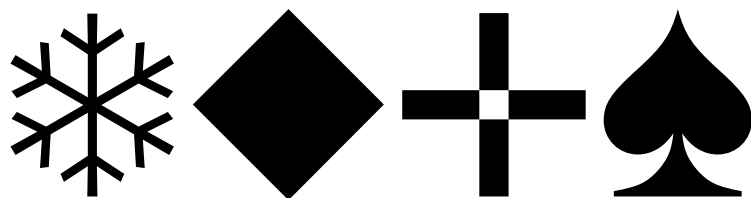

6



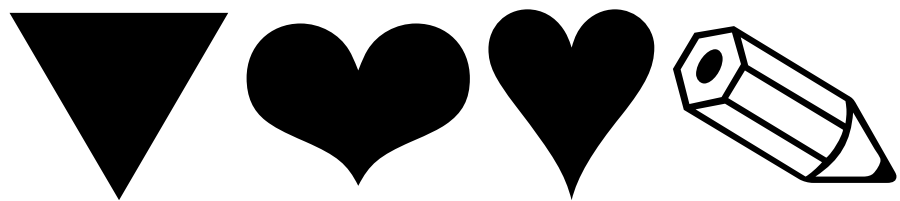

6

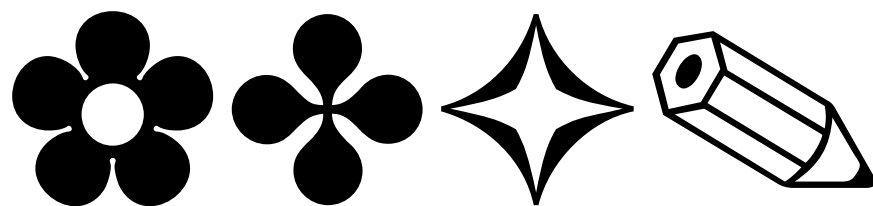

6

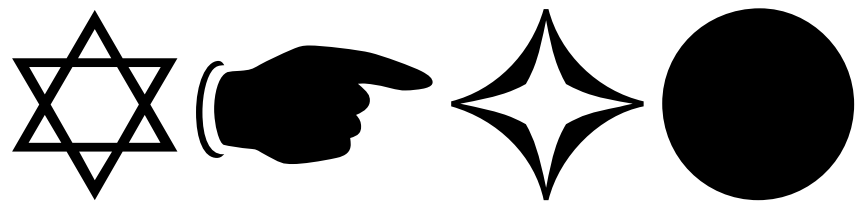

6

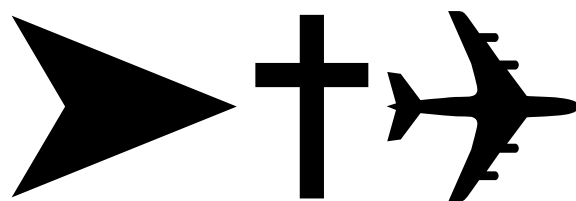

6

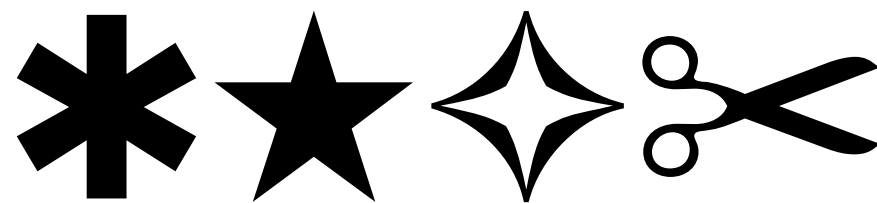

6

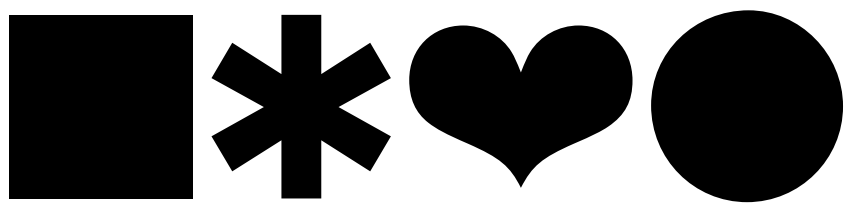

1

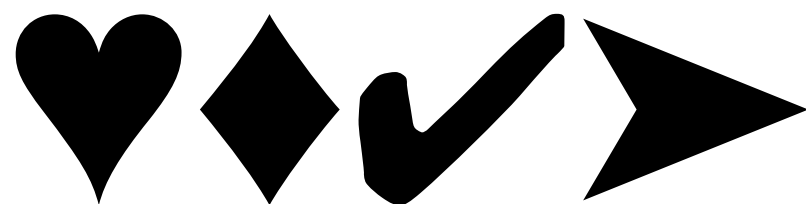

1

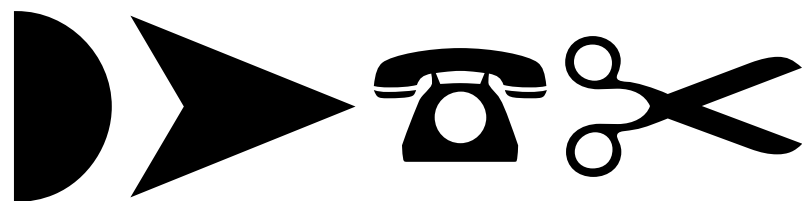

1



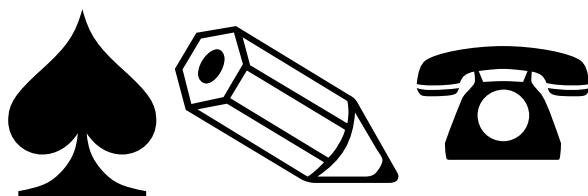

1

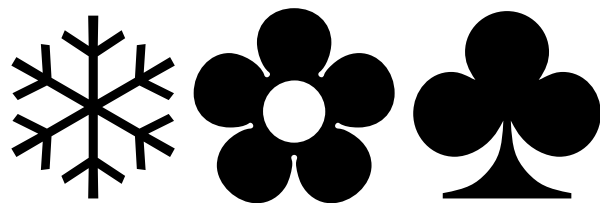

1

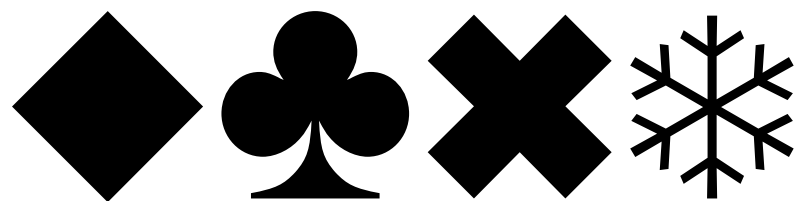

1

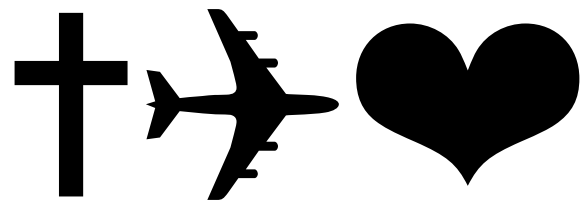

1

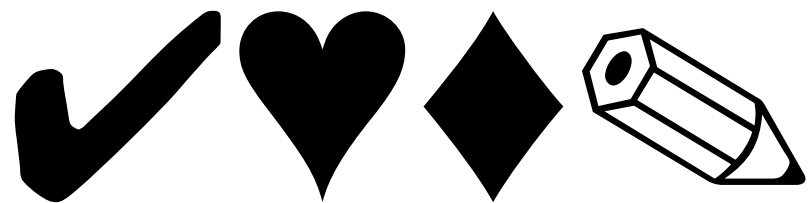

1

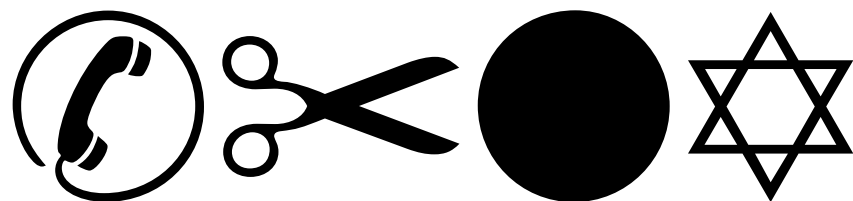

1

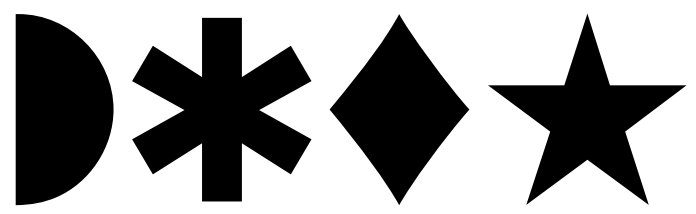

1

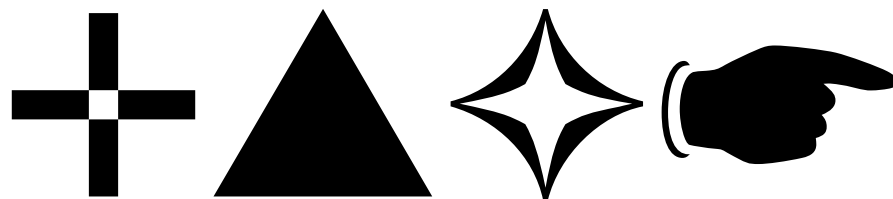

1



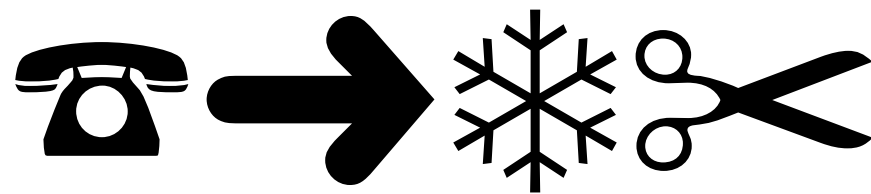

2

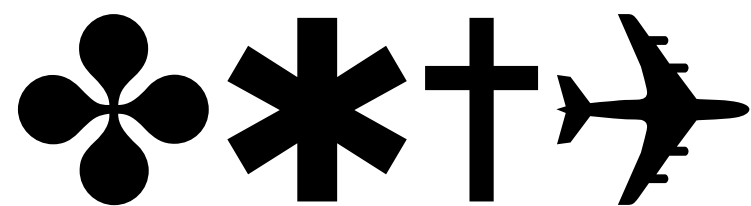

2

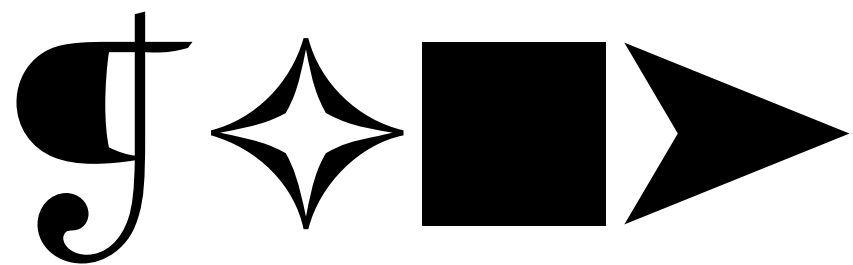

2

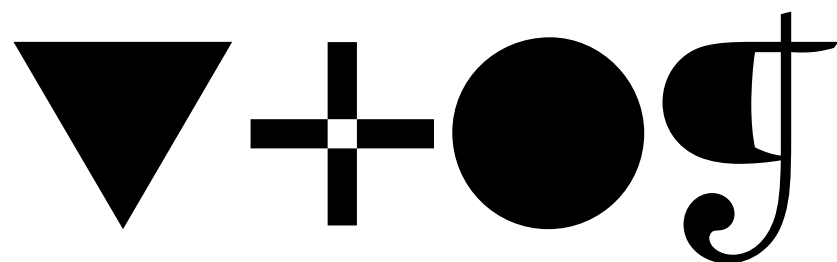

2

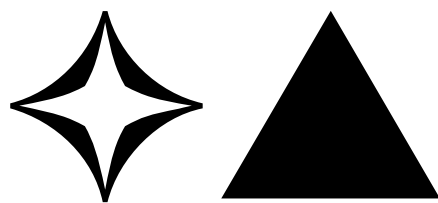

5

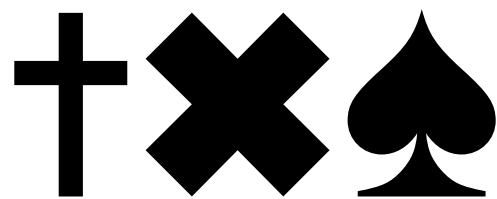

5

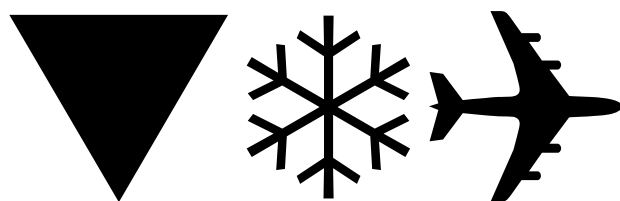

5

Supplement: OptionalSupplementaryMaterial [file 0210_dings_cards_activity_2_t.pdf › materials/tmp/0210_dings_cards_activity_2_t.pdf]

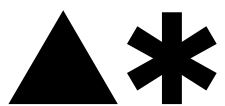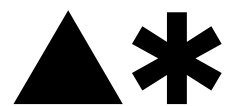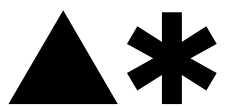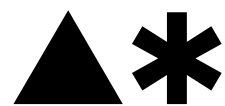

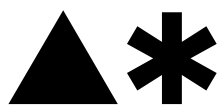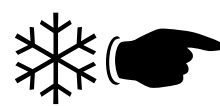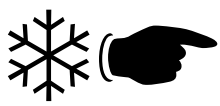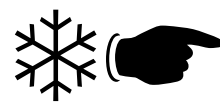









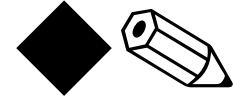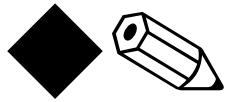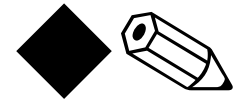

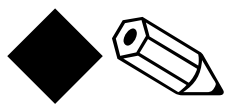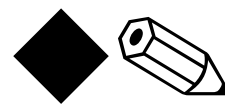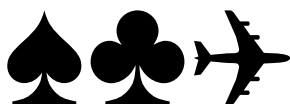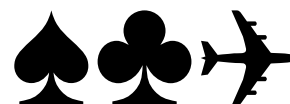



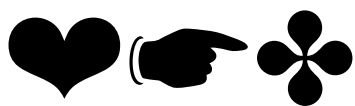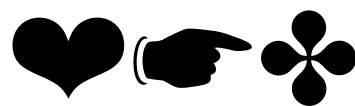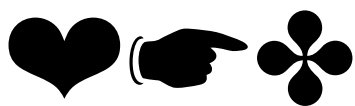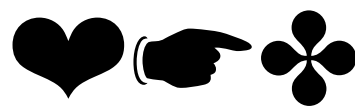

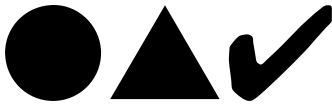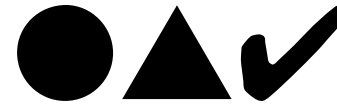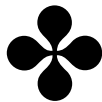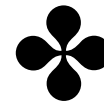



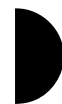

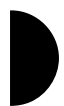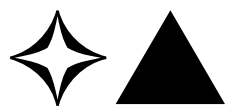





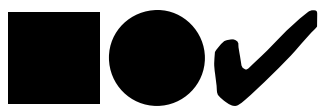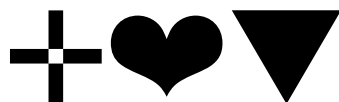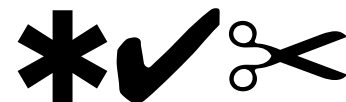





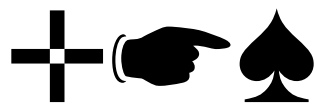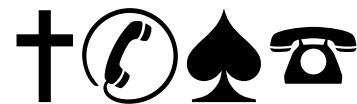

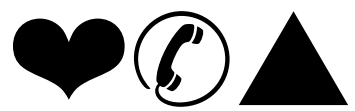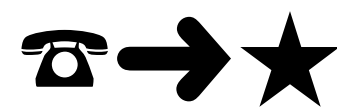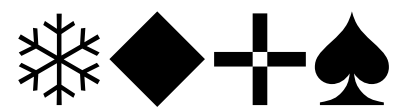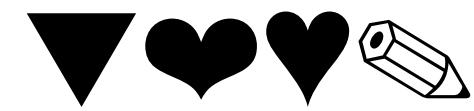

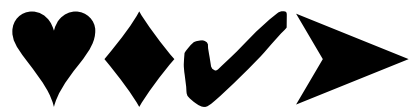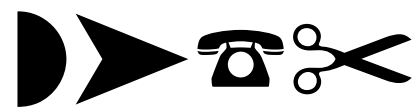

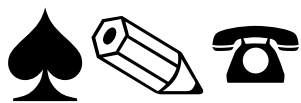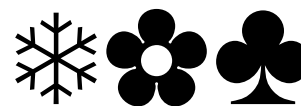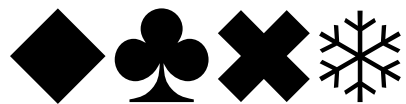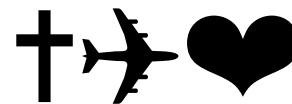

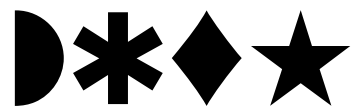

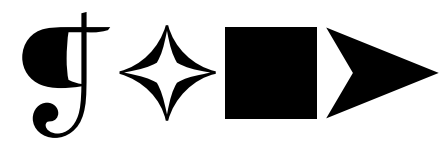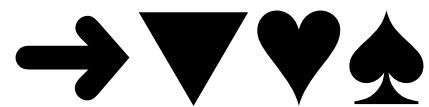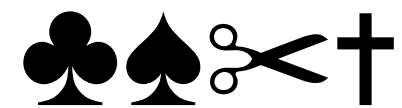



Supplement: OptionalSupplementaryMaterial [file Biancaneve_en_dings_cards_activity_1_t-2x2.pdf › materials/tmp/Biancaneve_en_dings_cards_activity_1_t-2x2.pdf]

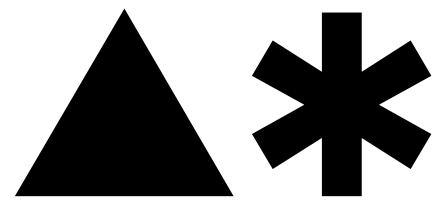







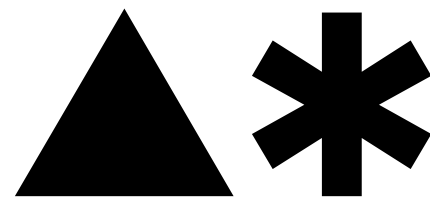









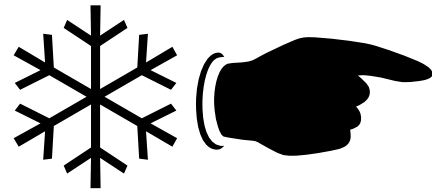













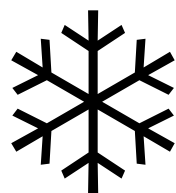













































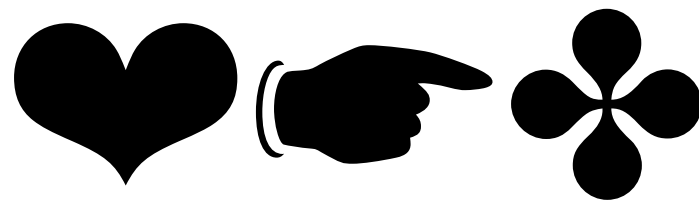



















































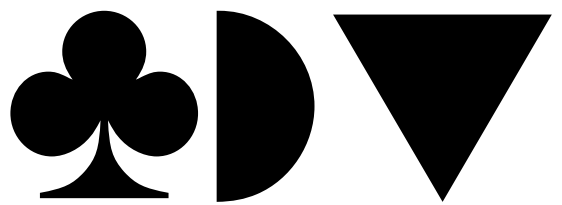





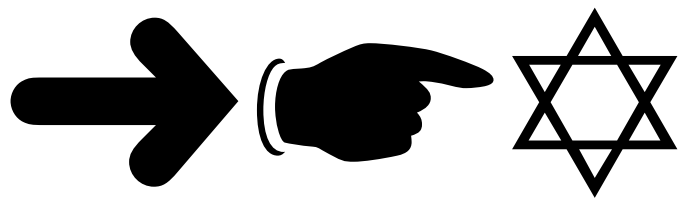









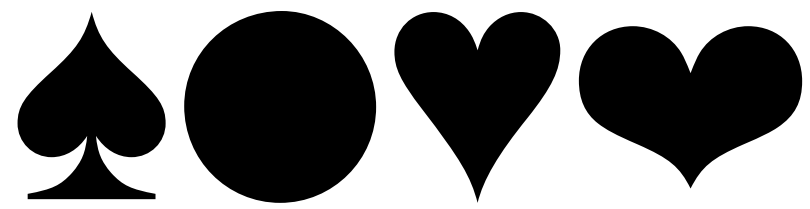





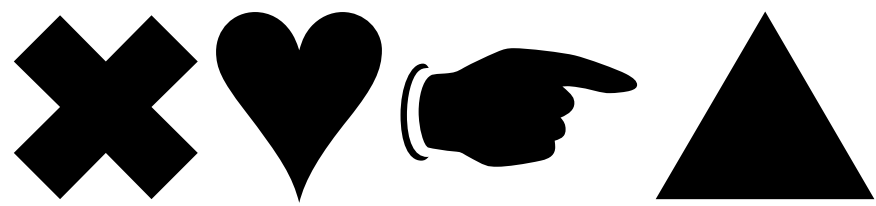

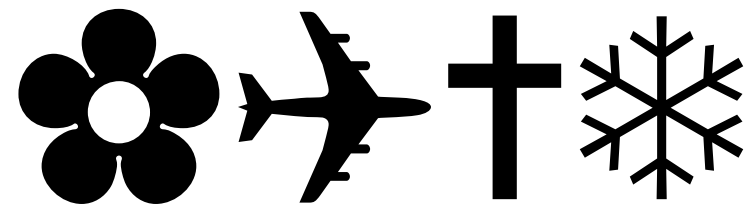

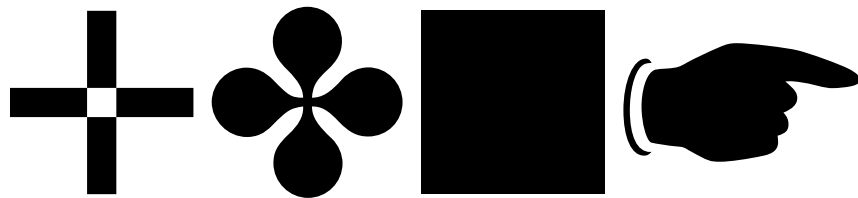









✕✱୨■



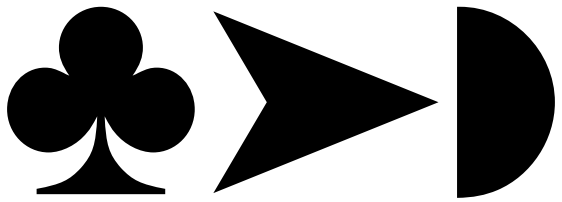

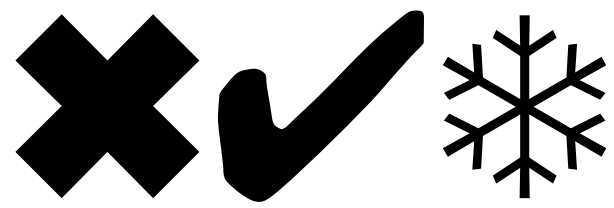

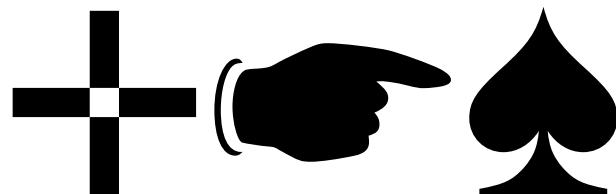





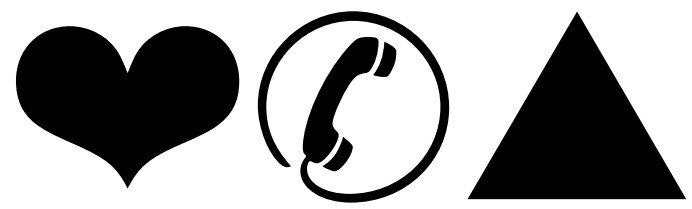



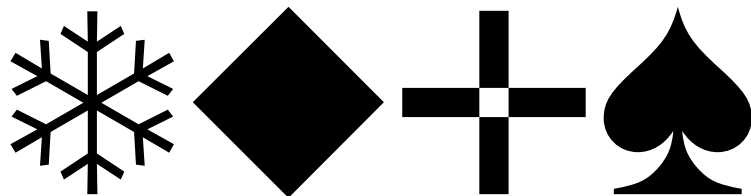

















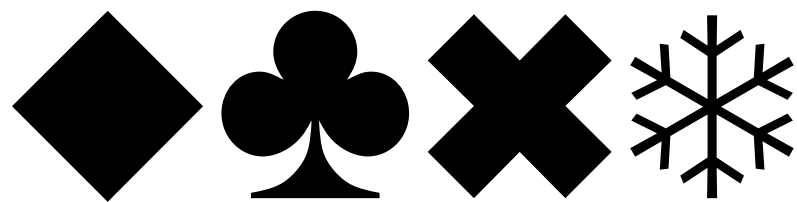





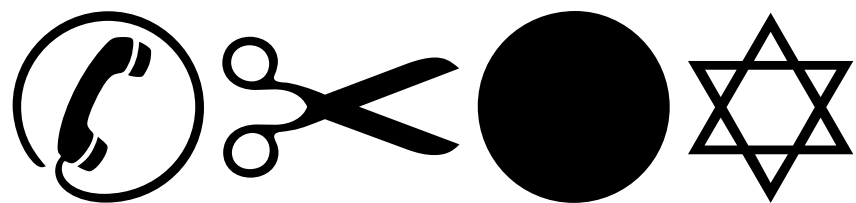

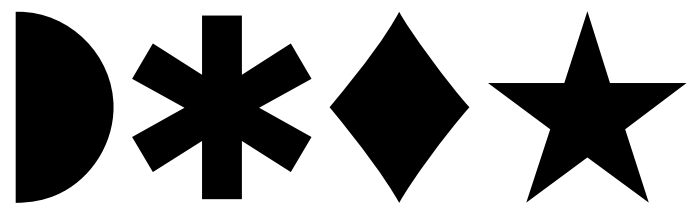

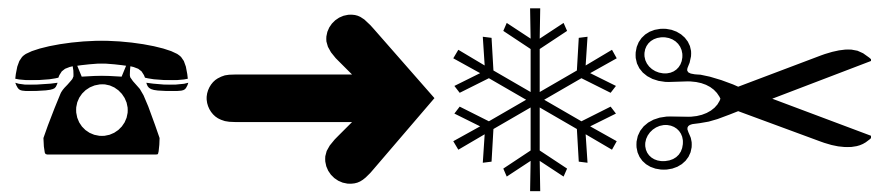



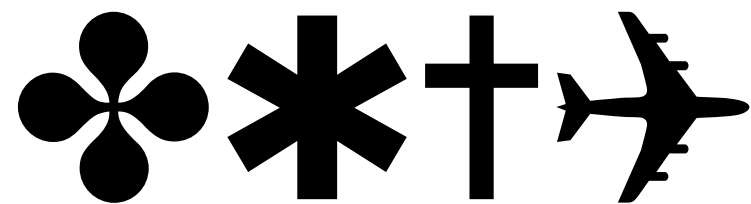

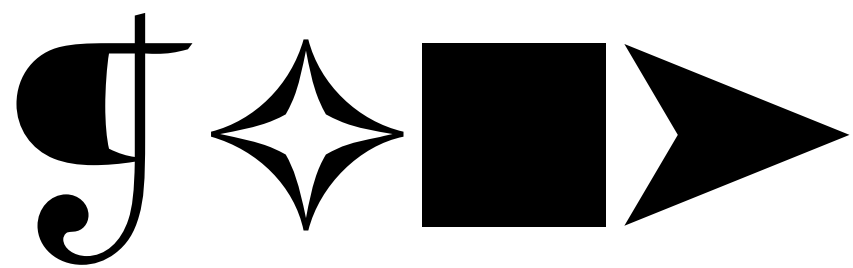







Supplement: OptionalSupplementaryMaterial [file Biancaneve_en_dings_cards_activity_1_t.pdf › materials/tmp/Biancaneve_en_dings_cards_activity_1_t.pdf]



4



4



4



4



4

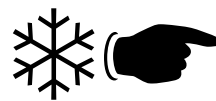

4



4

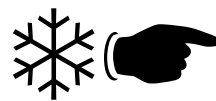

4



4



4



4



4



4



4

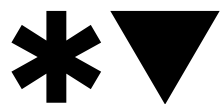

4

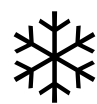

4



4



4



4



4

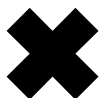

4

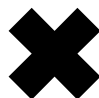

4

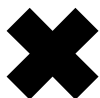

4

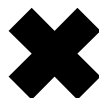

4

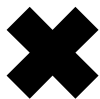

4

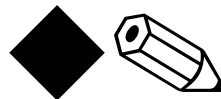

4

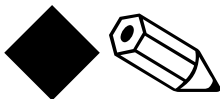

4

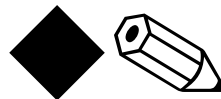

4

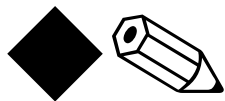

4

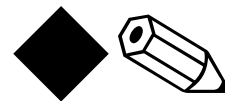

4

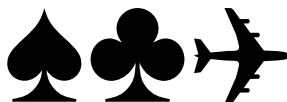

4

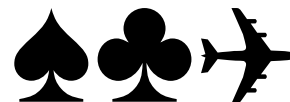

4





4



4



4

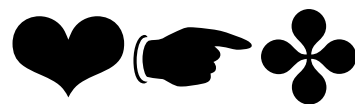

4

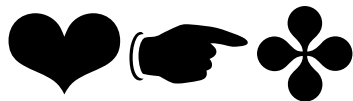

4

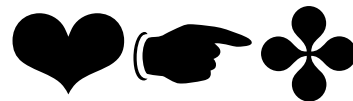

4

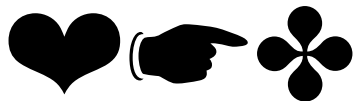

4

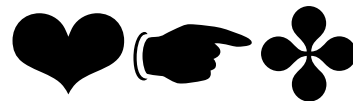

4



7



7



7



7



7



7

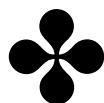

9

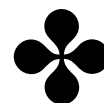

9



9



9



9



9

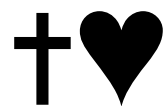

9

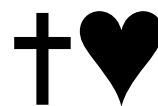

9

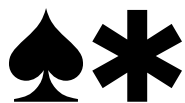

3

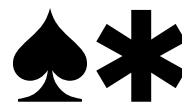

3



3



3



3



3



3



3



3



3



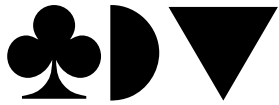

3

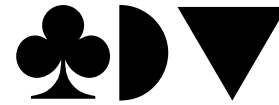

3

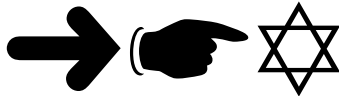

0

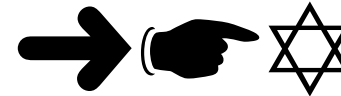

0



0



0



0



0



0



0



0



8



8

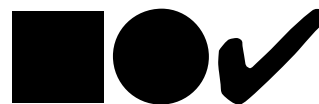

8

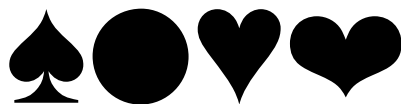

6



6



6



6



6



6

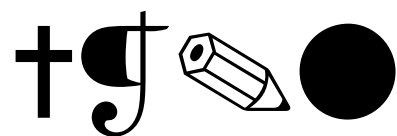

6

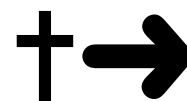

6



6



6



6



6



6



6

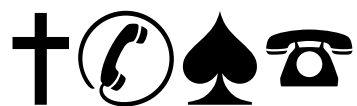

6

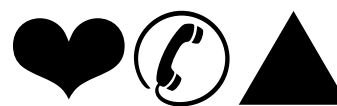

6



6

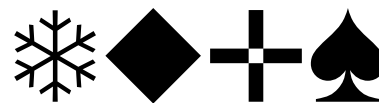

6





6



6



6



6



6



1



1

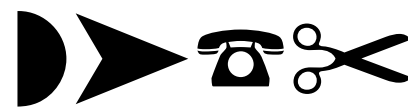

1



1



1

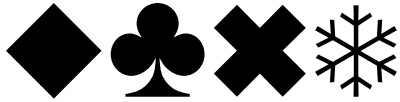

1

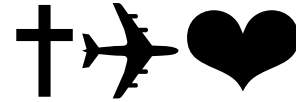

1



1



1

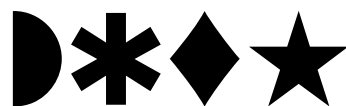

1

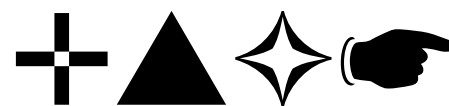

1

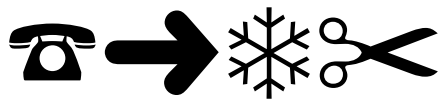

2

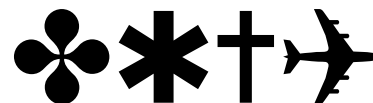

2

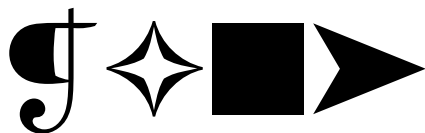

2

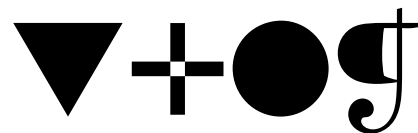

2



5

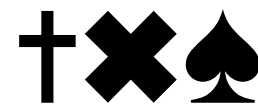

5



5

Supplement: OptionalSupplementaryMaterial [file Biancaneve_en_dings_cards_activity_2_t-2x2.pdf › materials/tmp/Biancaneve_en_dings_cards_activity_2_t-2x2.pdf]



4



4



4



4

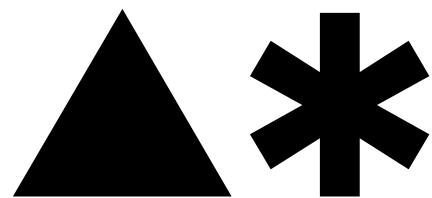

4



4



4



4





4



4



4



4



4



4



4



4





4



4



4



4



4

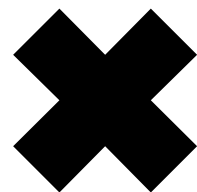

4



4



4





4



4



4



4



4



4

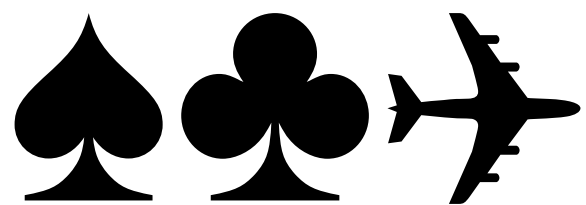

4

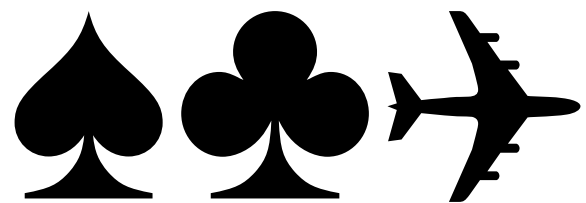

4





4



4

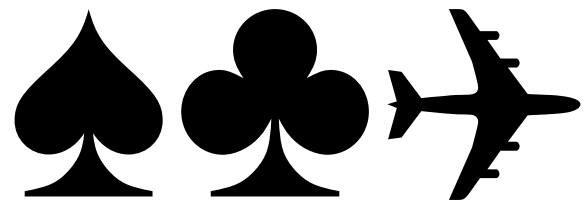

4

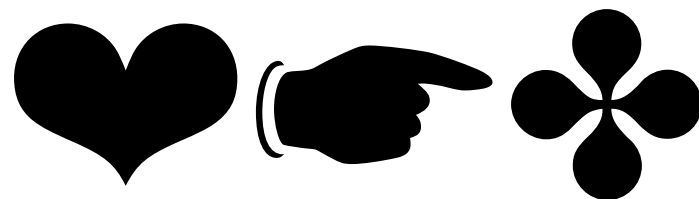

4



4



4



4



4





7

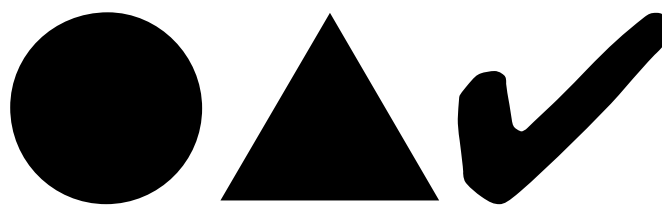

7



7



7



7



7

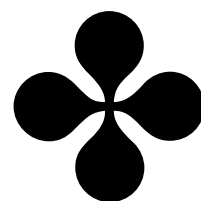

9



9





9



9



9



9



9



9



3

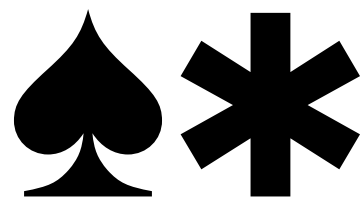

3





3



3



3



3



3



3



3



3





3



3

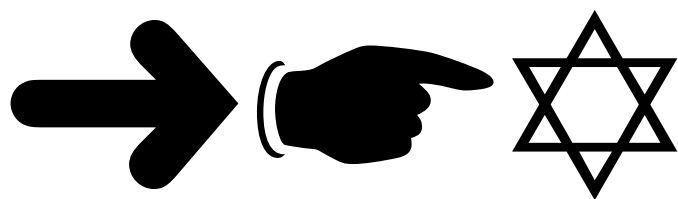

0



0



0

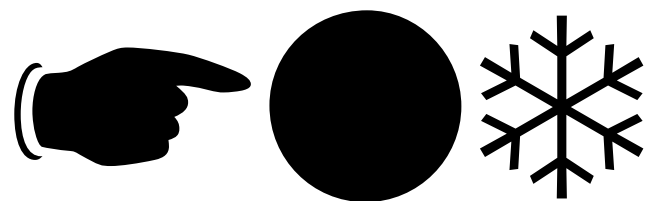

0



0



0





0



0



0

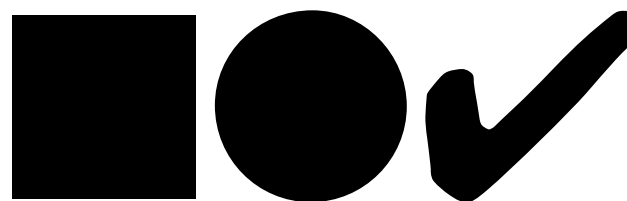

8

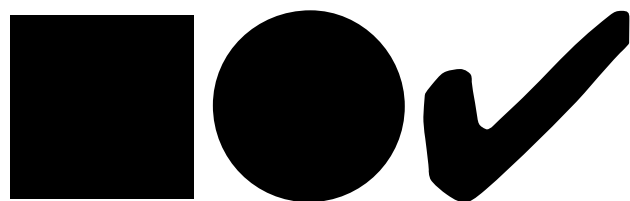

8



8

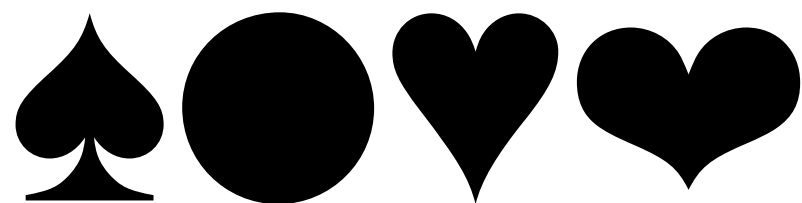

6



6



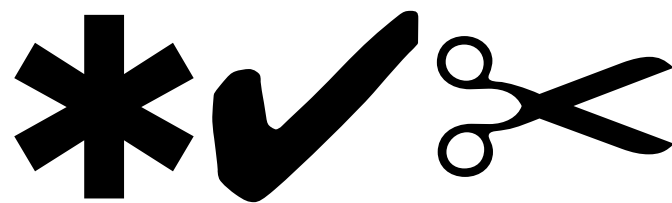

6



6



6

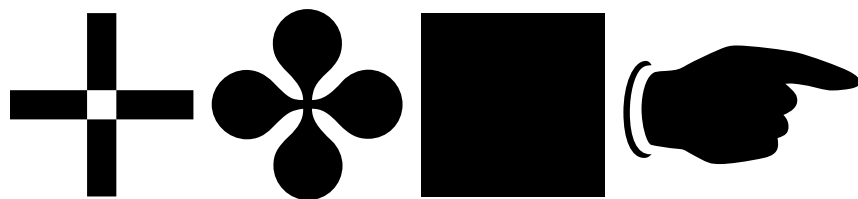

6

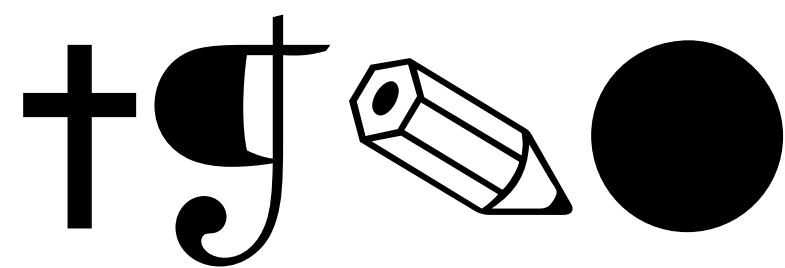

6



6

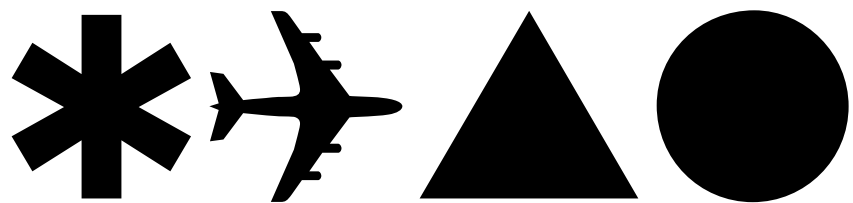

6

✕✖୨■

6



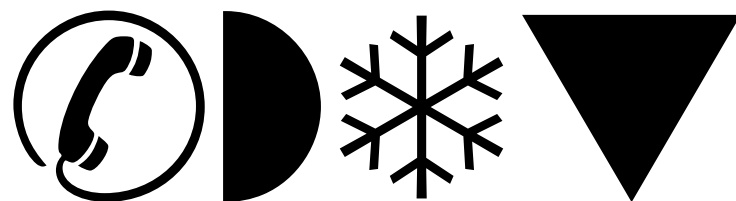

6

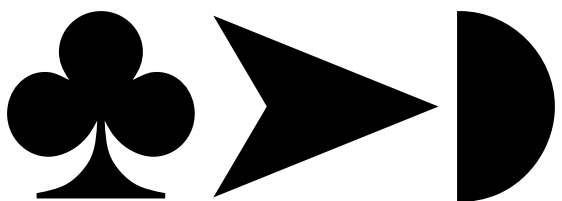

6

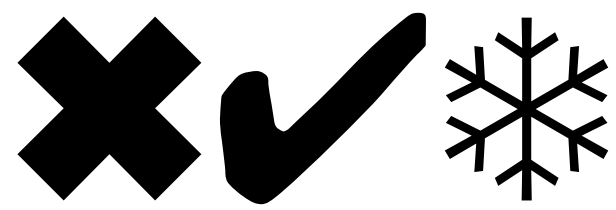

6



6

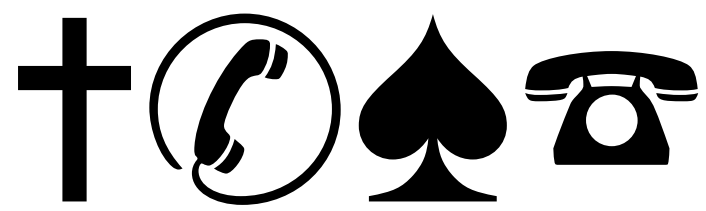

6



6

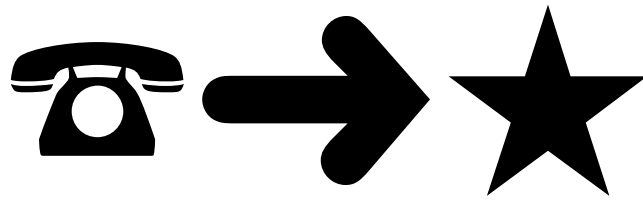

6



6



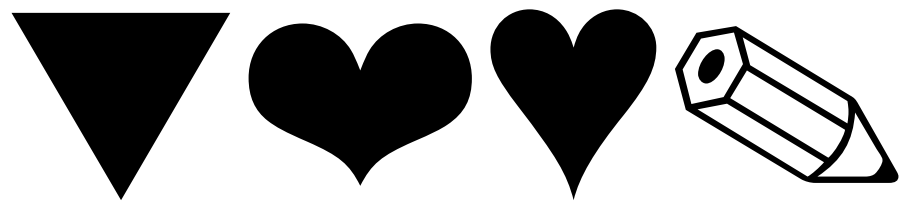

6

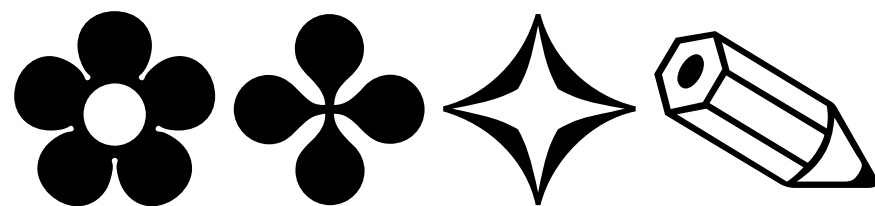

6

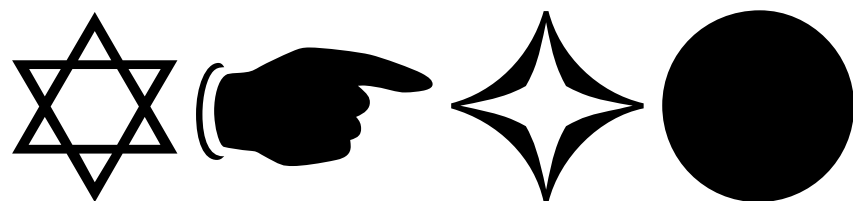

6



6



6



1



1

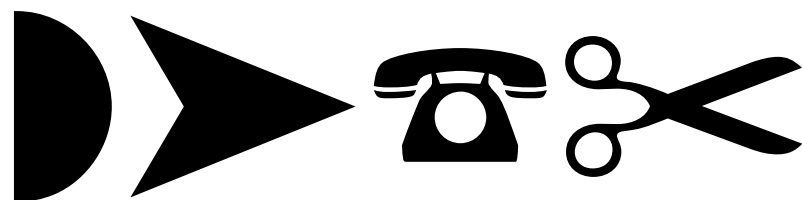

1





1



1



1



1

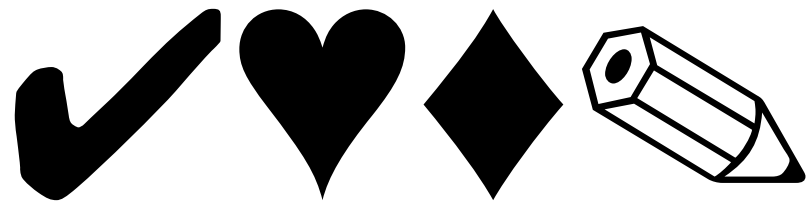

1



1



1



1



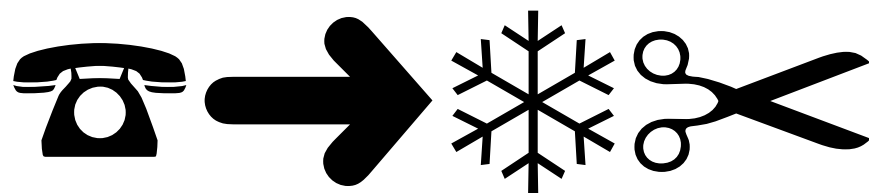

2

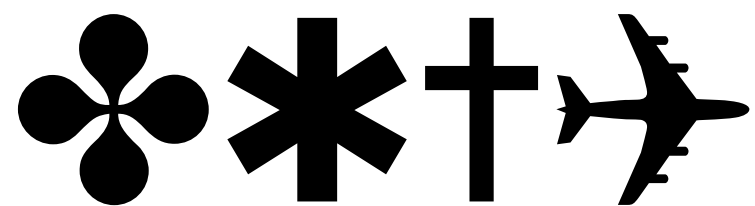

2



2



2



5

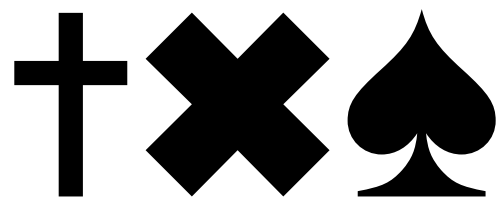

5



5

Supplement: OptionalSupplementaryMaterial [file Biancaneve_en_dings_cards_activity_2_t.pdf › materials/tmp/Biancaneve_en_dings_cards_activity_2_t.pdf]

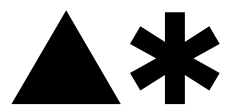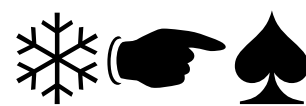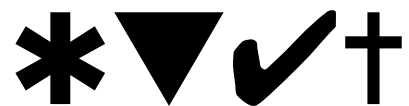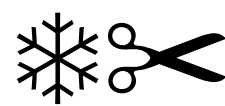

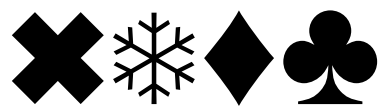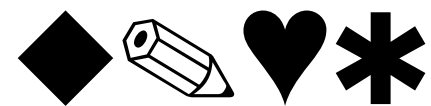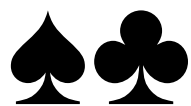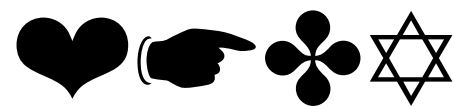

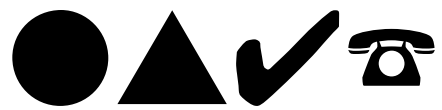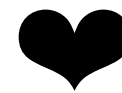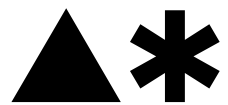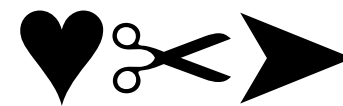

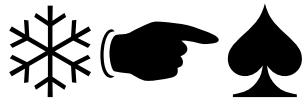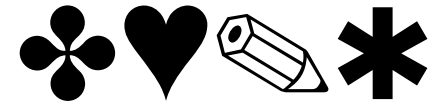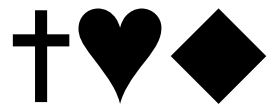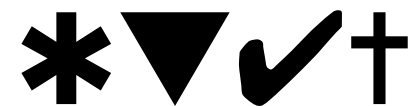

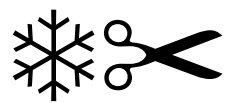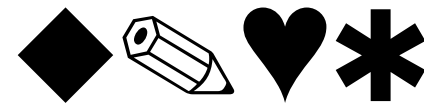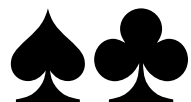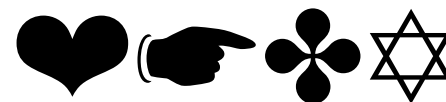

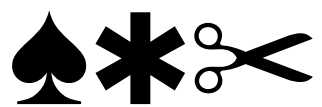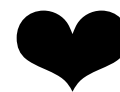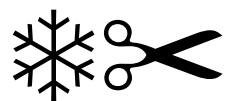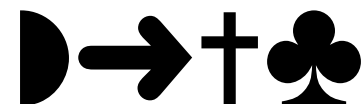

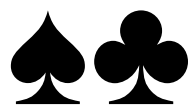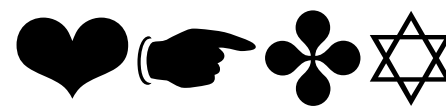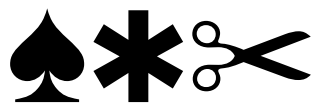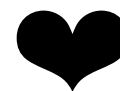

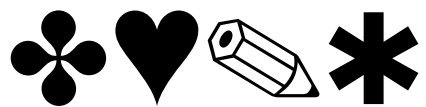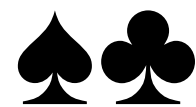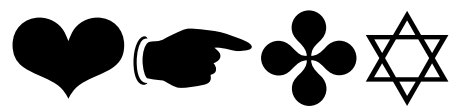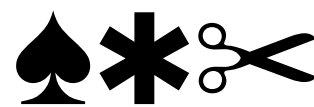



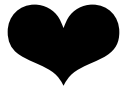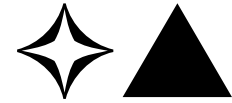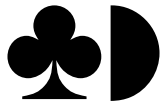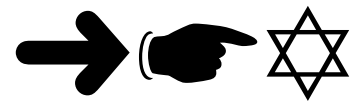

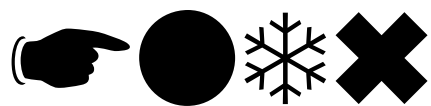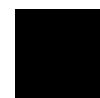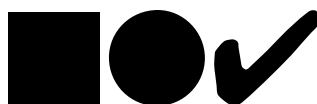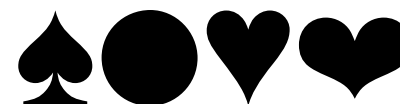

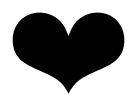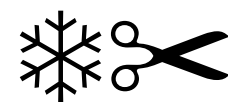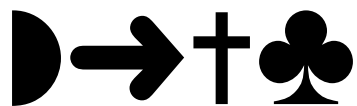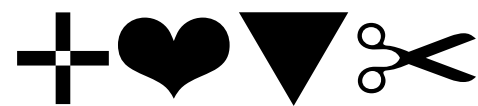

Supplement: OptionalSupplementaryMaterial [file Biancaneve_it_dings_cards_activity_1_t-2x2.pdf › materials/tmp/Biancaneve_it_dings_cards_activity_1_t-2x2.pdf]



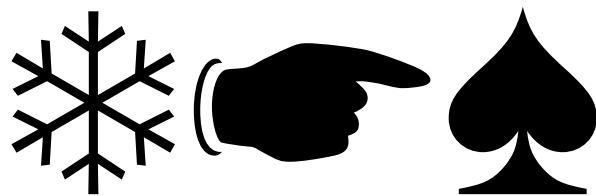

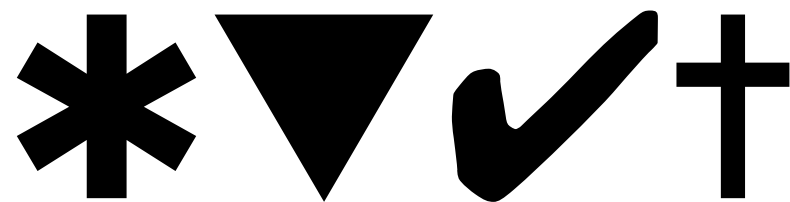

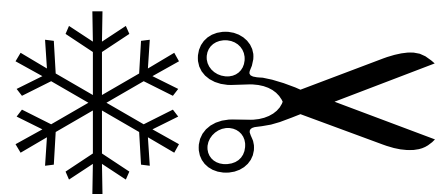

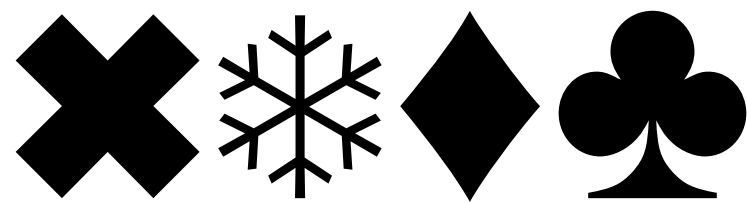

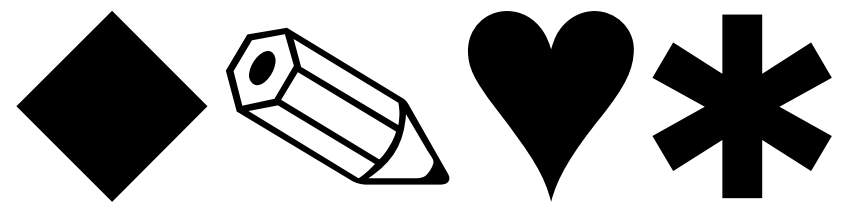

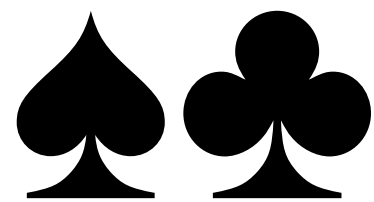

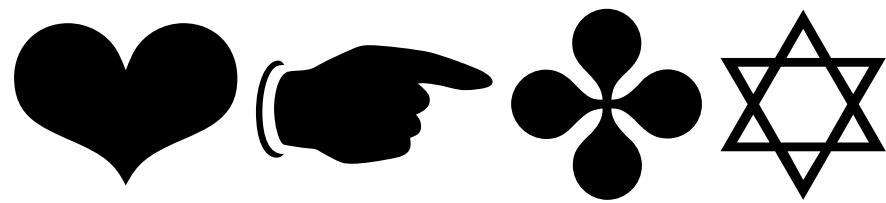



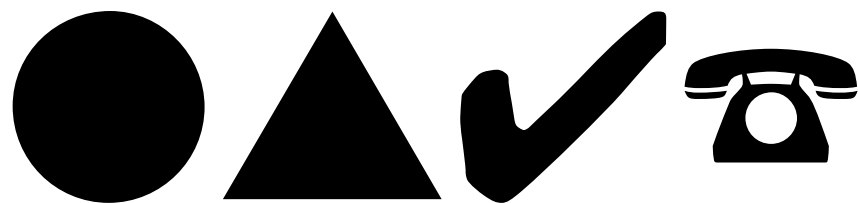

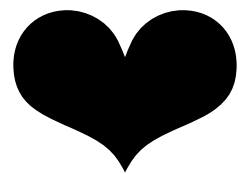



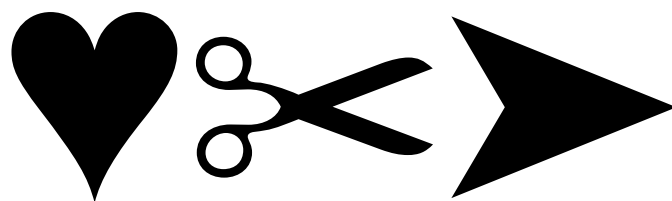



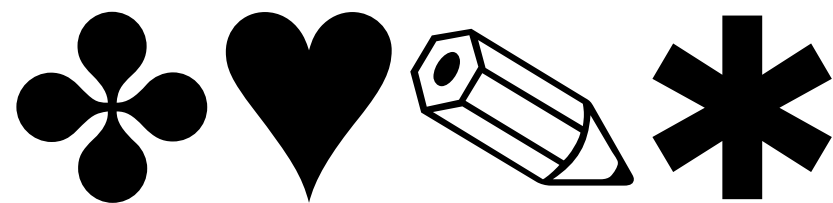

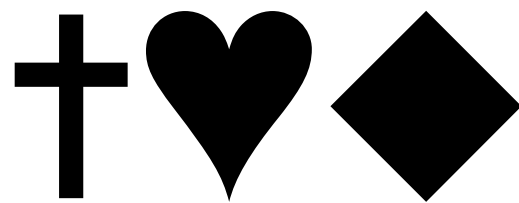





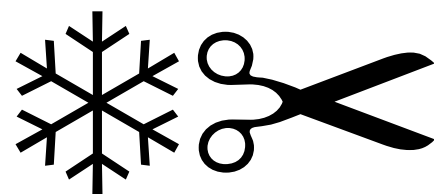







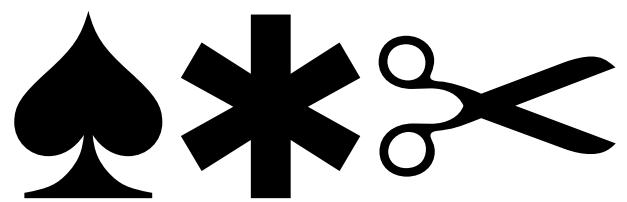

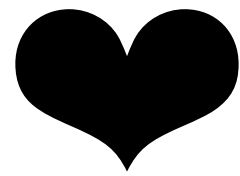



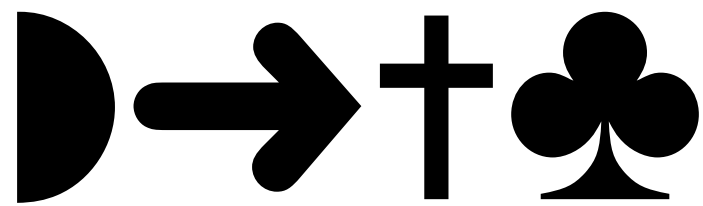



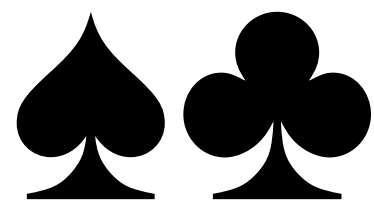

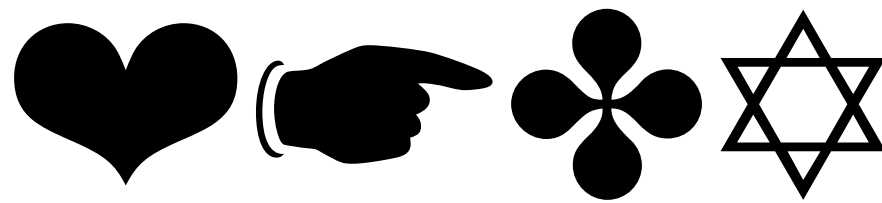





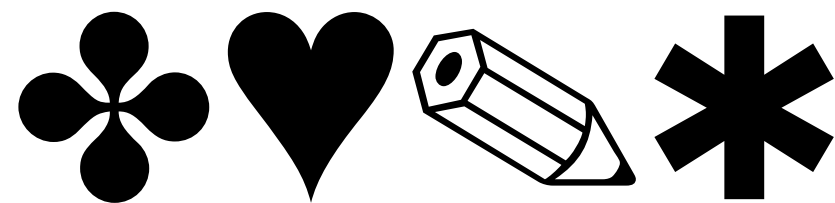











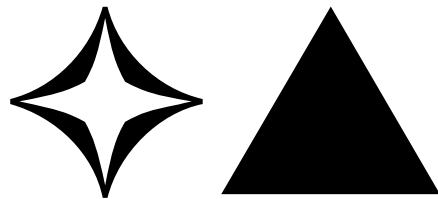

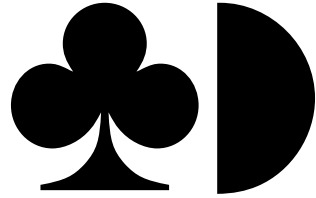



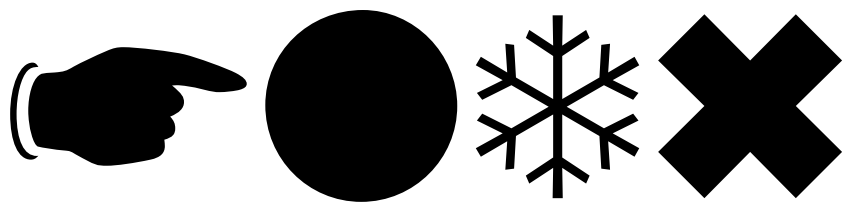

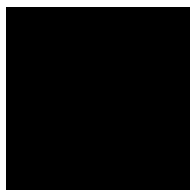



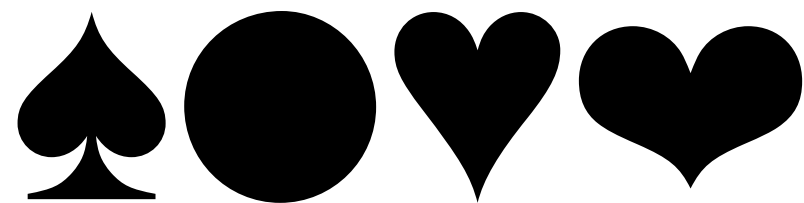







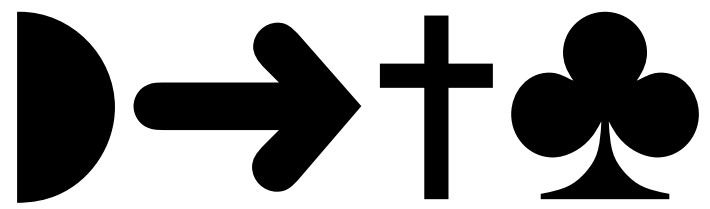

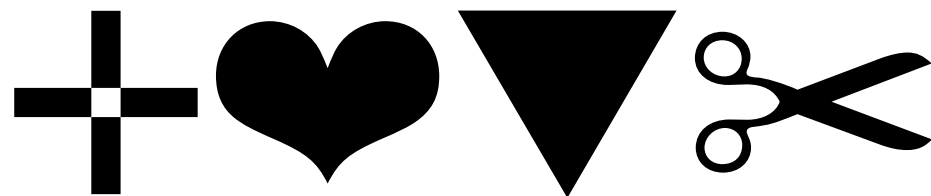

Supplement: OptionalSupplementaryMaterial [file Biancaneve_it_dings_cards_activity_1_t.pdf › materials/tmp/Biancaneve_it_dings_cards_activity_1_t.pdf]

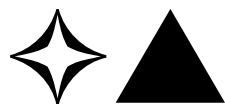

0



0

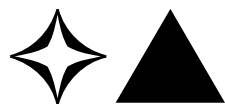

0

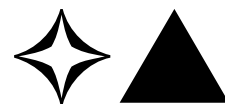

0

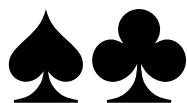

0

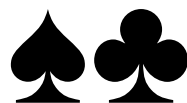

0

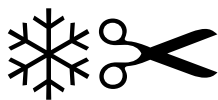

0

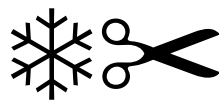

0

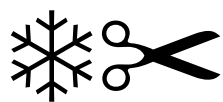

0

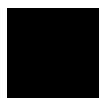

0

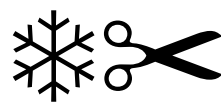

0

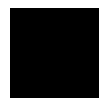

0



0

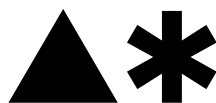

0



0

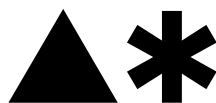

0



0

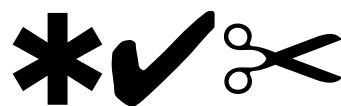

0

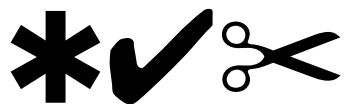

0

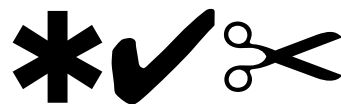

0

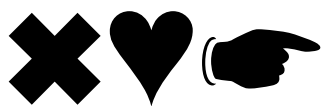

0

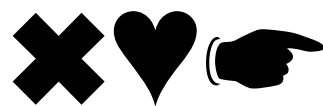

0

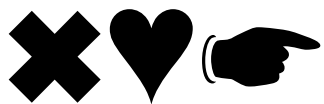

0

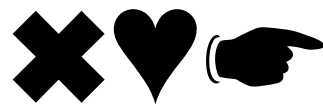

0

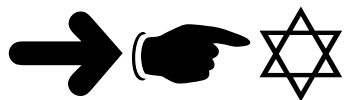

6

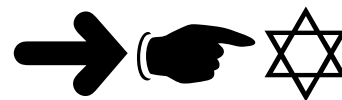

6



6

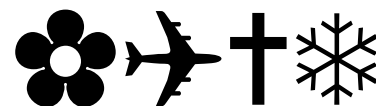

6

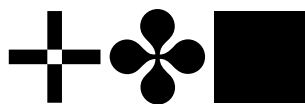

6

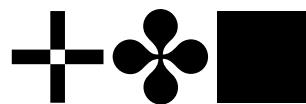

6

†

7

†

7

$\dagger$   
7

$\dagger$   
7

$\dagger \rightarrow$   
7

$\dagger \rightarrow$   
7

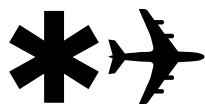

4

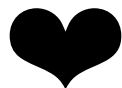

4

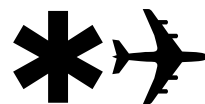

4

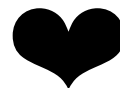

4

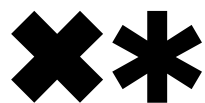

4

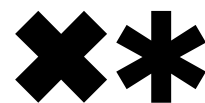

4

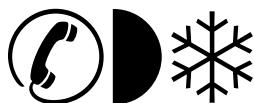

4

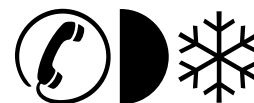

4

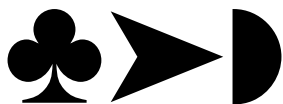

8

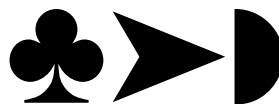

8

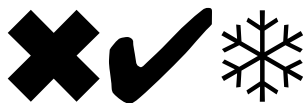

8

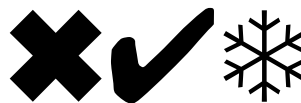

8

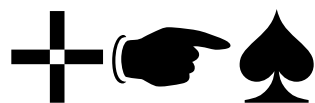

8

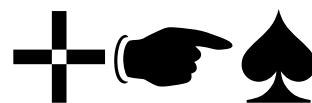

8

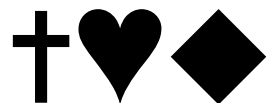

5

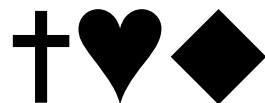

5



1

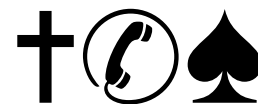

1

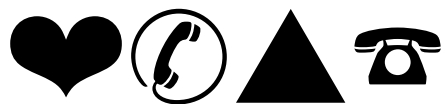

1

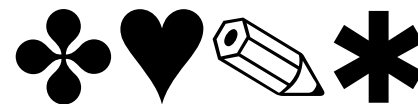

1

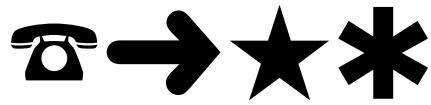

1

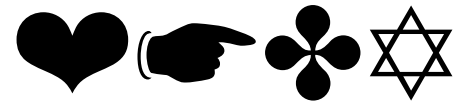

1

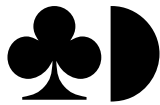

1

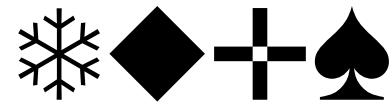

1

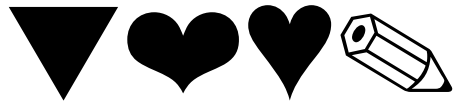

1

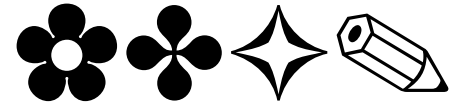

1

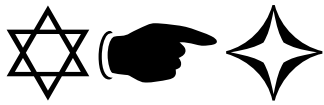

1

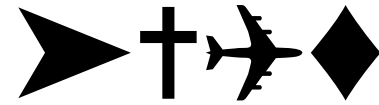

1



1



1

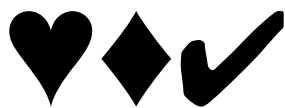

1



1

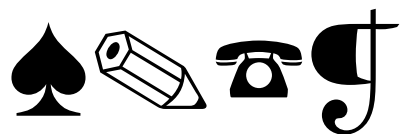

1

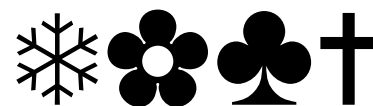

1

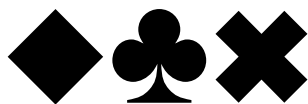

1

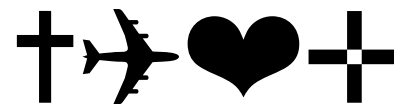

1

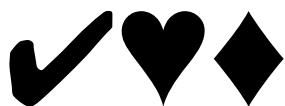

1

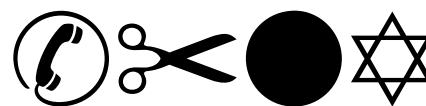

1



1

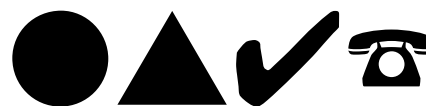

2

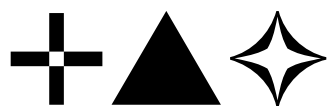

2

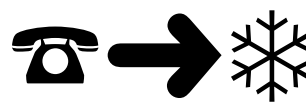

2

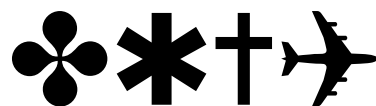

2

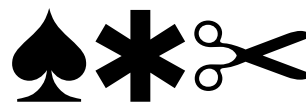

2

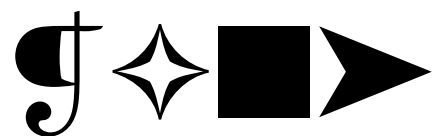

2

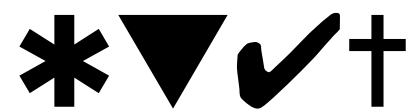

2

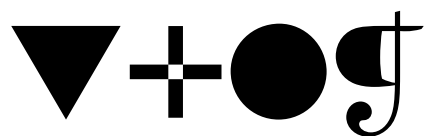

2

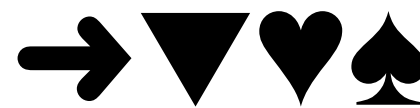

2

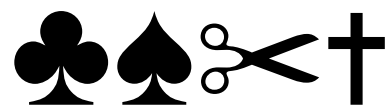

2

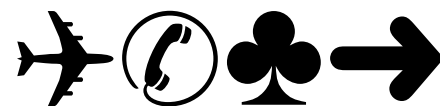

2

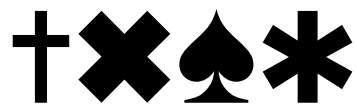

3

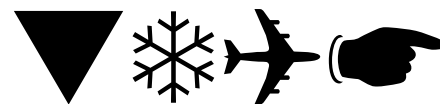

3

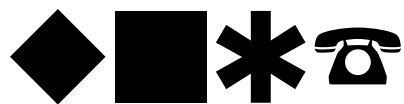

3

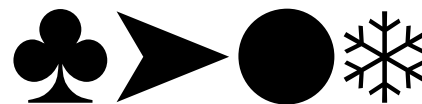

3

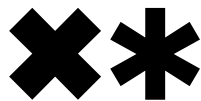

9

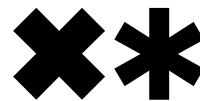

9

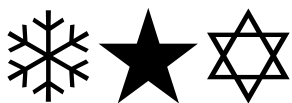

9

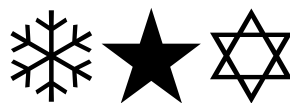

9

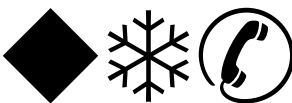

9

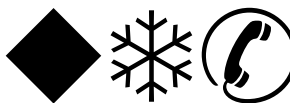

9

Supplement: OptionalSupplementaryMaterial [file Biancaneve_it_dings_cards_activity_2_t-2x2.pdf › materials/tmp/Biancaneve_it_dings_cards_activity_2_t-2x2.pdf]

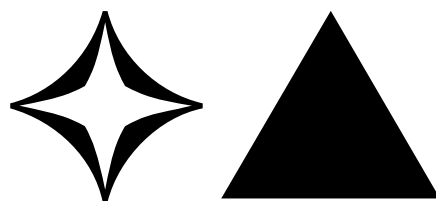

0



0



0



0

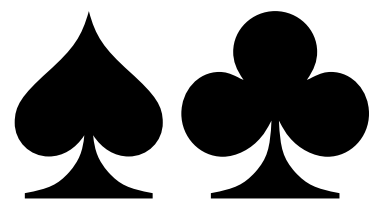

0



0

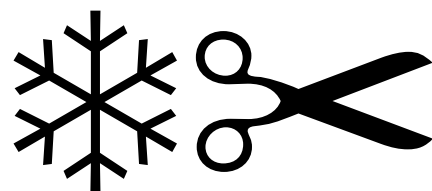

0



0





0



0

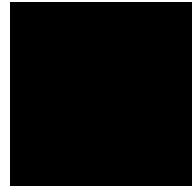

O



O

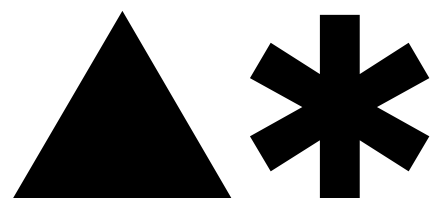

0



0



0



0



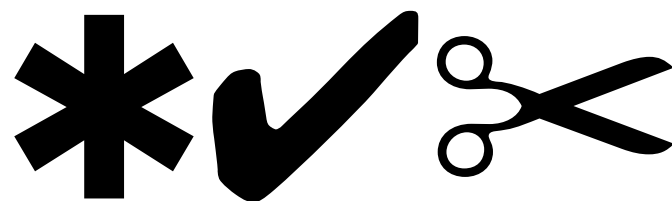

0

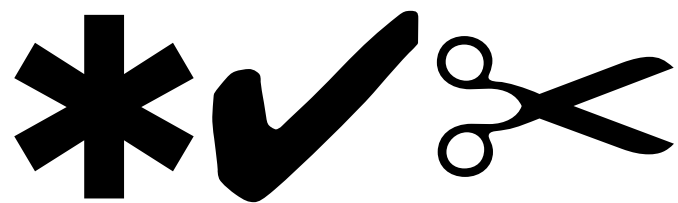

0



0



0

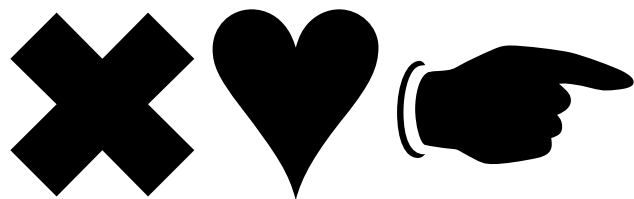

0



0



0



0





6

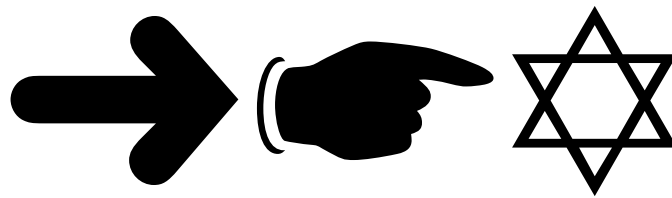

6

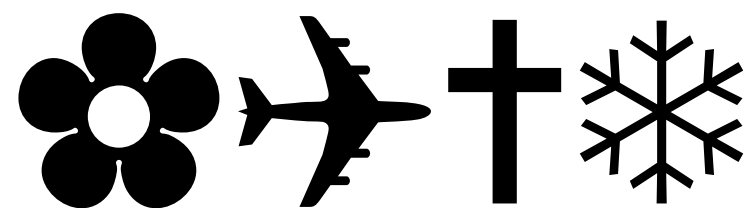

6



6

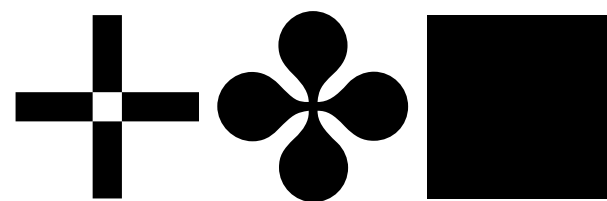

6



6

+

7

+

7



+

7

+

7

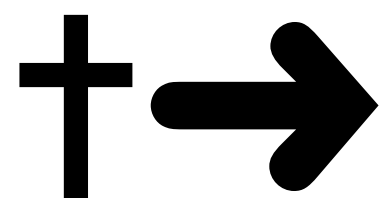

7



7

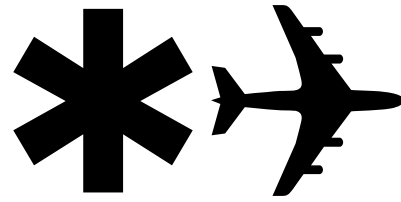

4

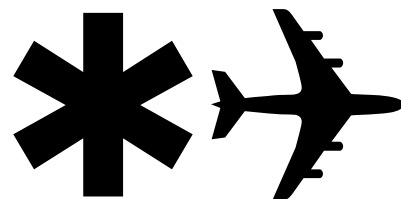

4

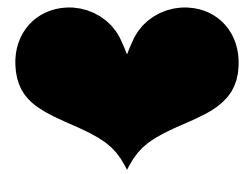

4



4



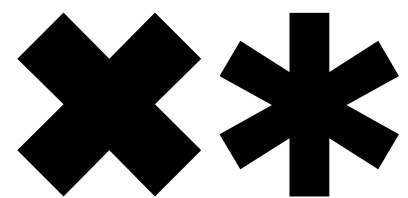

4



4

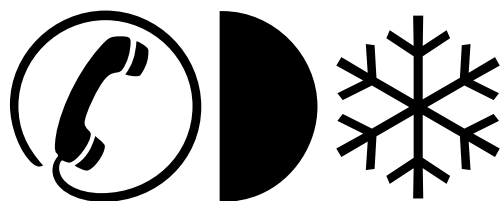

4

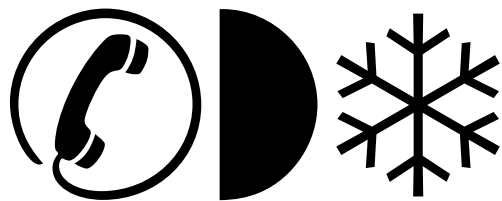

4

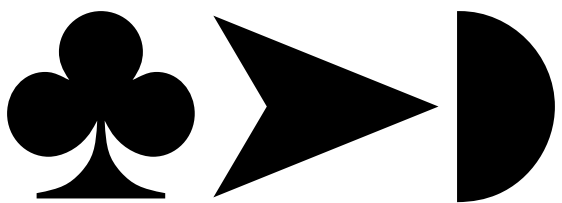

8



8

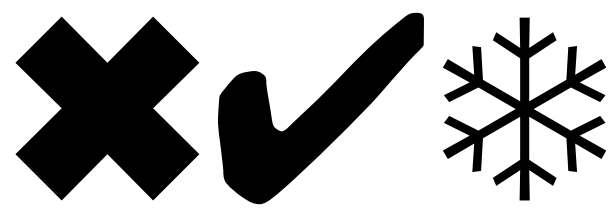

8



8



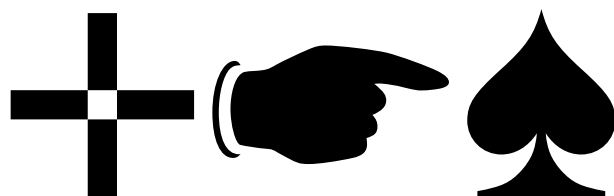

8



8

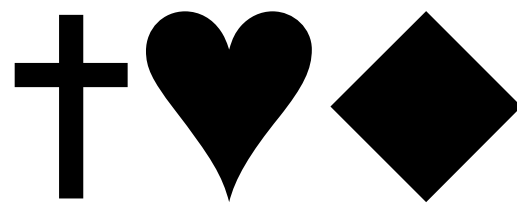

5



5



1

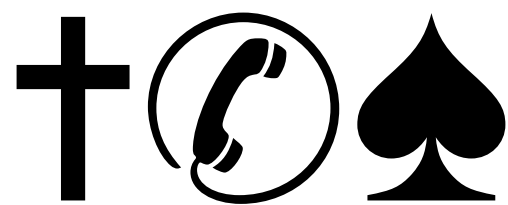

1

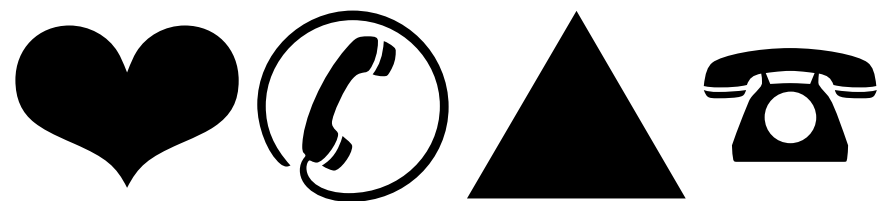

1

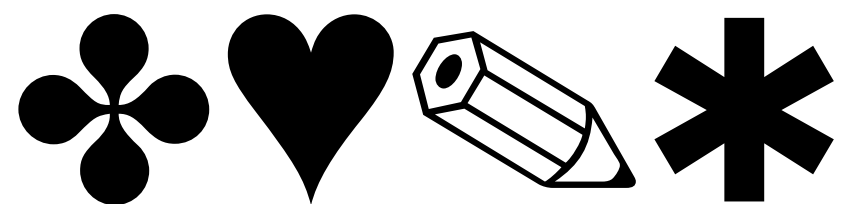

1



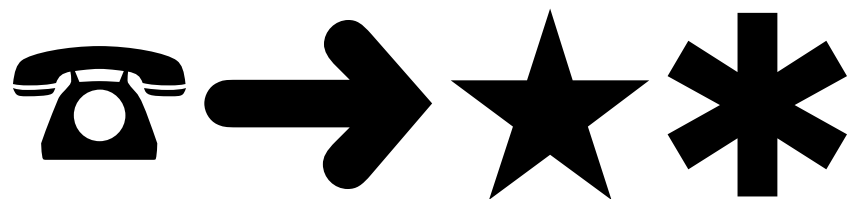

1

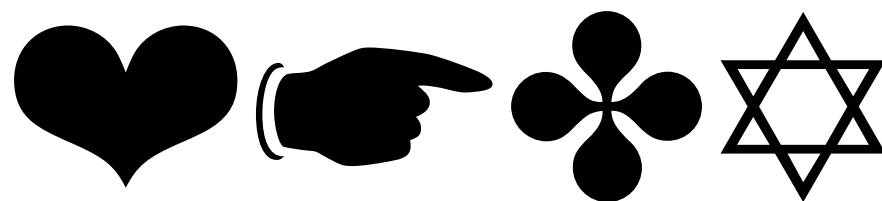

1

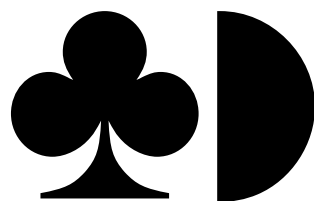

1



1

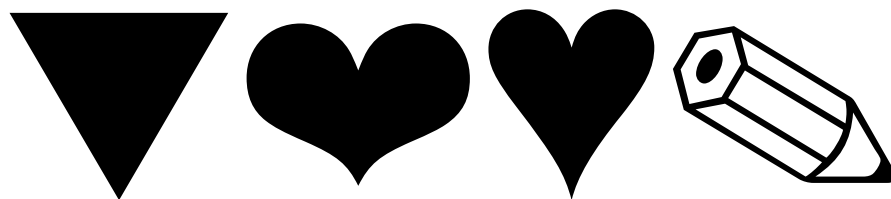

1

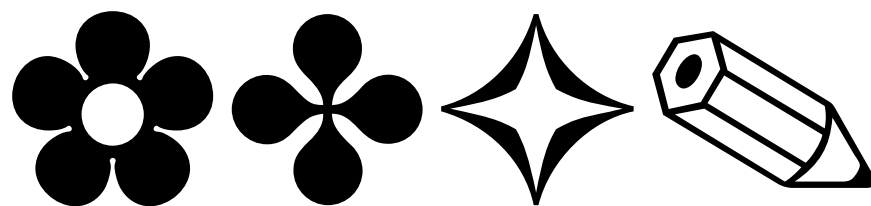

1

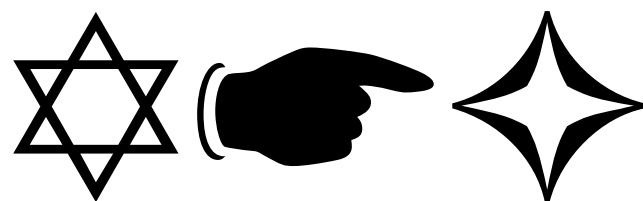

1

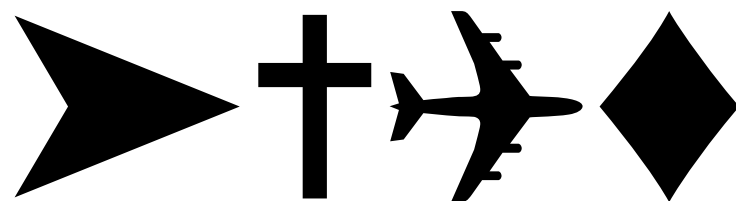

1





1



1

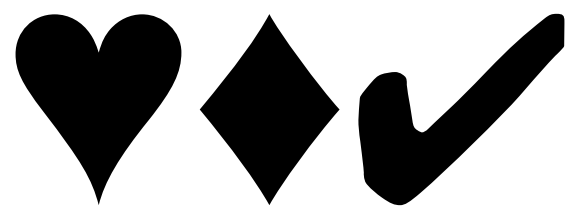

1



1

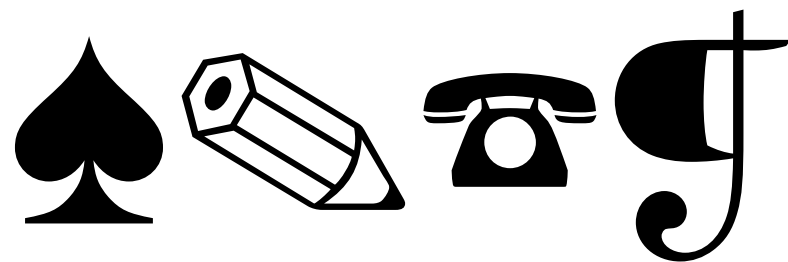

1

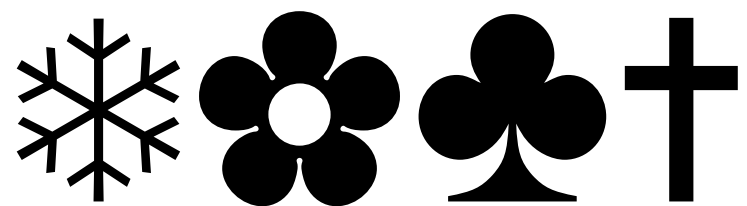

1

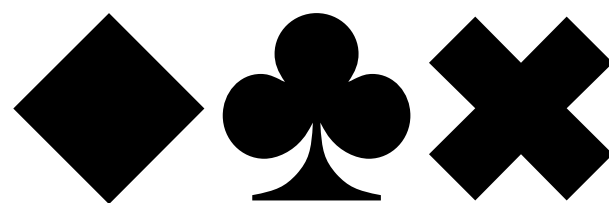

1

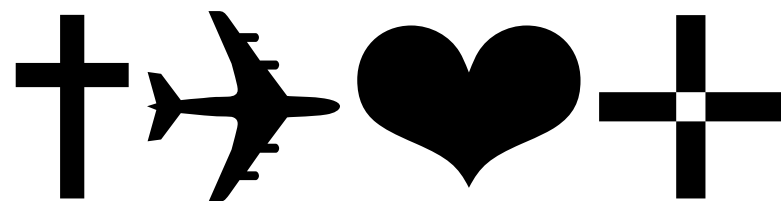

1



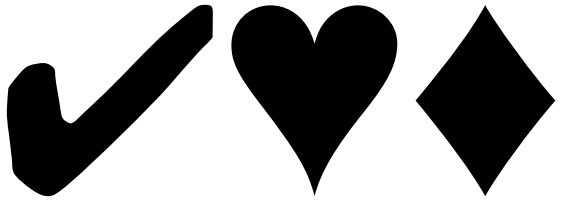

1



1

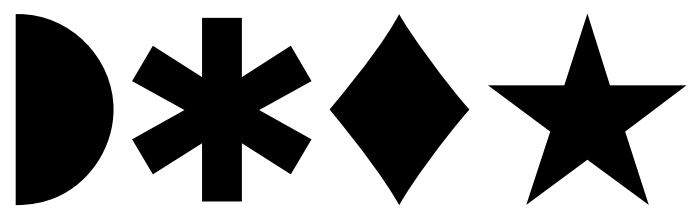

1

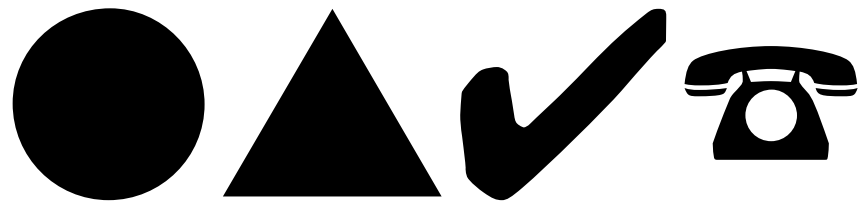

2

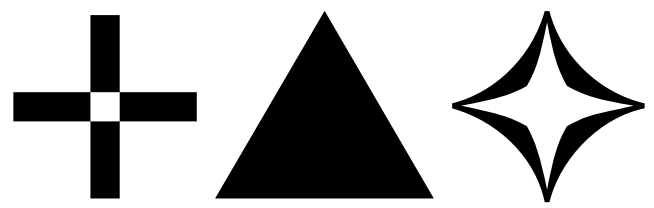

2

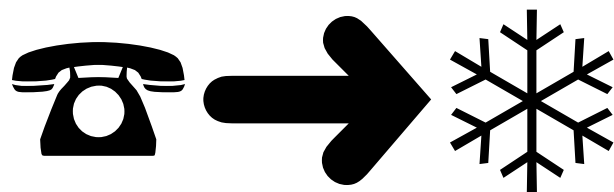

2



2

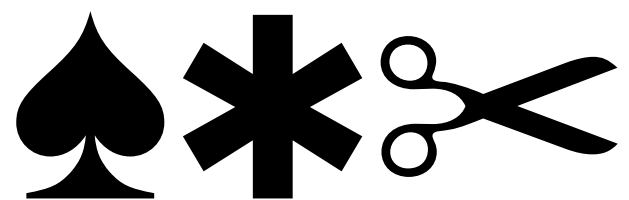

2





2

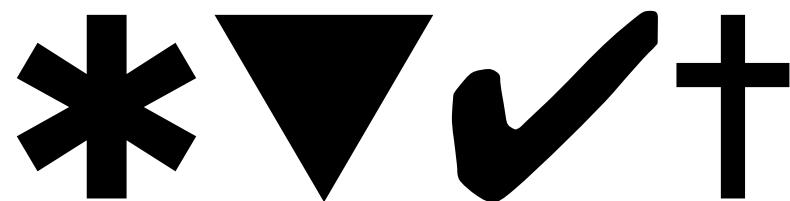

2



2

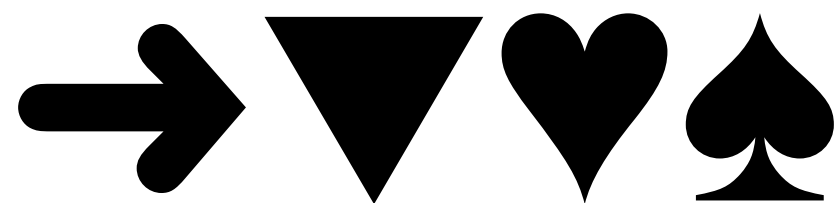

2

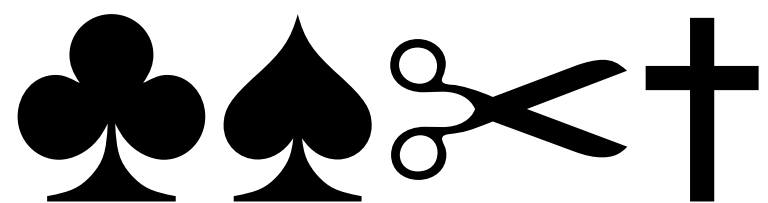

2

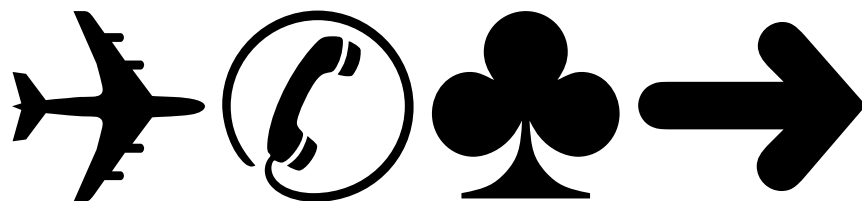

2

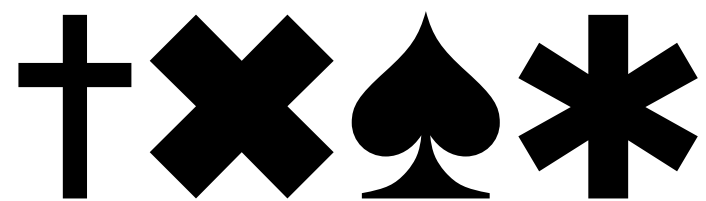

3

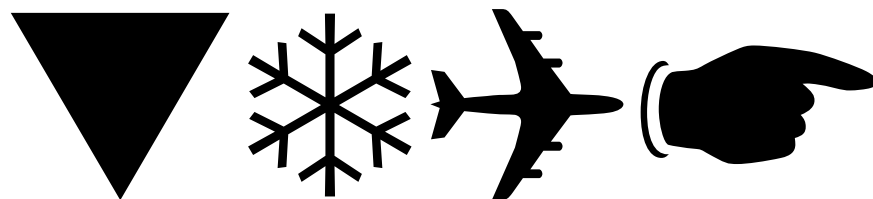

3



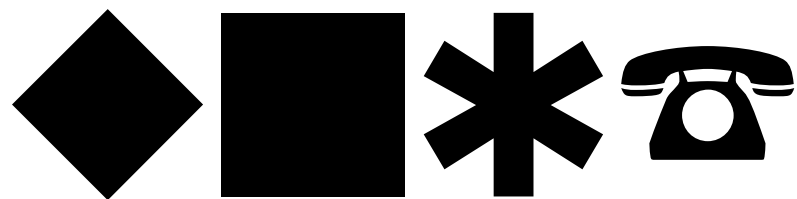

3

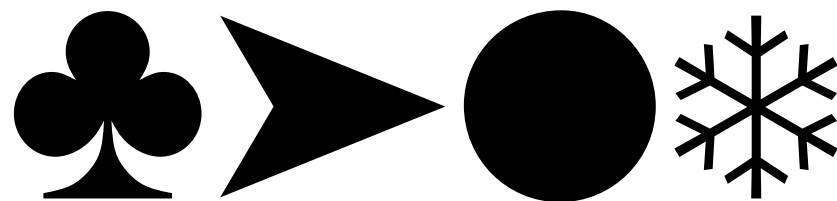

3



9



9

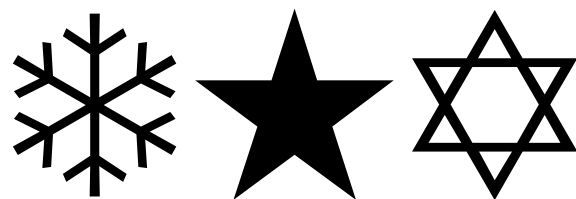

9



9

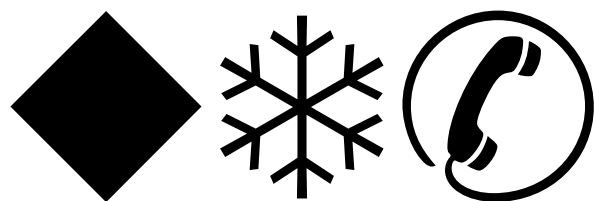

9



9

Supplement: OptionalSupplementaryMaterial [file Biancaneve_it_dings_cards_activity_2_t.pdf › materials/tmp/Biancaneve_it_dings_cards_activity_2_t.pdf]
